# Supplementary material for: A Mucoralean White Collar-1 Photoreceptor Controls Virulence by Regulating an Intricate Gene-Network during Host Interactions.
Source: Preprints.org preprint supplement (doi:10.20944/preprints202012.0804.v1), 2020-12-31
Supplement: Supplementary file 1 [file tableS1.xlsx]

## Sheet: allGenesDEvalues
geneId	log2FC_R7BM-R7Bc	pvalue	adj_pvalue	log2FC_WC1aM-WC1ac	pvalue	adj_pvalue	log2FC_WC1aM-R7BM	pvalue	adj_pvalue	log2FC_WC1Ac-R7Bc	pvalue	adj_pvalue	log2CPM_R7Bcb	log2CPM_R7Bca	log2CPM_R7BMb	log2CPM_R7BMa	log2CPM_WC1aMa	log2CPM_WC1aMb	log2CPM_WC1aca	log2CPM_WC1acb
10078	-0.903752	0.0018892	0.0108203	-0.992312	0.00209988	0.0384257	-1.06226	0.00146644	0.0317583	-0.973698	0.00129418	0.00488066	6.47284	6.84714	5.87772	5.63231	4.63413	4.74966	5.55531	5.81431
10111	0.346162	0.0908949	0.153802	-0.24324	0.214966	0.413845	0.328492	0.110753	0.288999	0.917894	0.00165285	0.00582827	6.23344	6.52925	6.5373	6.91409	7.00458	7.10595	7.38539	7.21089
104028	-0.729546	0.00686398	0.022101	-0.188747	0.372779	0.575986	-0.803158	0.00611812	0.0604019	-1.34396	0.000289841	0.00173497	6.63671	6.56047	6.0995	5.64045	5.25267	4.88417	5.2376	5.2722
104050	0.550048	0.0320307	0.0691228	0.105028	0.624998	0.782051	0.508468	0.0582373	0.19759	0.953488	0.00185016	0.0063214	3.05516	3.37618	3.79702	3.72898	4.04648	4.49319	4.27588	4.05861
104074	-1.52031	0.0160881	0.0413925	-0.900919	0.121399	0.289651	-0.262803	0.62712	0.763106	-0.882199	0.0955115	0.137651	5.94963	6.62479	4.15825	5.41704	4.6971	4.31411	5.0755	5.73146
104084	-1.17404	0.000180575	0.0027562	-0.372504	0.10178	0.260306	-0.779296	0.00654675	0.0623142	-1.58083	3.29682e-05	0.000510387	10.4501	10.5404	9.42753	9.20532	8.57564	8.50785	8.67196	9.16096
104089	0.525749	0.0123244	0.0340362	5.17178	2.58449e-07	0.000818252	-0.495568	0.0303128	0.135414	-5.1416	1.41602e-07	0.000130012	10.0403	9.91729	10.3233	10.7015	10.1486	9.87329	5.01428	4.65956
104093	-0.392616	0.518187	0.601428	1.02472	0.245639	0.444369	-1.84076	0.0358103	0.148241	-3.2581	0.00332713	0.00995803	6.95743	5.42913	6.39101	5.21931	3.68161	4.23576	2.76797	3.11452
104098	0.11128	0.526343	0.609057	0.381837	0.0628166	0.222723	0.112263	0.53071	0.694273	-0.158294	0.373725	0.43746	5.25652	4.78633	5.14645	5.11803	5.21013	5.27873	4.90222	4.82337
104113	0.156307	0.55397	0.634019	0.724551	0.0331486	0.15645	0.89702	0.0148525	0.0922955	0.328775	0.2301	0.290817	7.49024	6.89351	7.09582	7.60657	8.17876	8.31531	7.57642	7.46857
104125	1.95299	7.27648e-05	0.00180588	0.294375	0.181285	0.371343	0.866496	0.00486948	0.0541175	2.52511	1.33649e-05	0.000357607	2.49358	3.07682	4.84159	4.62207	5.51395	5.68969	5.29553	5.32055
104136	0.199735	0.159467	0.236477	0.0884432	0.695609	0.83003	-3.32867	1.59446e-06	0.00475788	-3.21738	9.0962e-07	0.000202977	5.5454	5.74968	5.9337	5.76107	2.39556	2.63731	2.4486	2.41091
104141	-0.893869	0.0983582	0.16383	0.663823	0.212319	0.410979	-0.00675208	0.989141	0.993971	-1.56444	0.0139189	0.0294382	6.22018	7.16503	6.40097	5.19188	5.58226	5.99338	5.18875	5.0608
104148	0.696005	0.0110283	0.0312968	0.274354	0.222418	0.41986	0.427709	0.0886929	0.252297	0.84936	0.00335379	0.0100177	3.44403	3.06397	3.8905	4.01849	4.17	4.58032	4.14017	4.06735
104153	0.88044	0.000974351	0.00717892	0.200027	0.228572	0.426354	0.303873	0.0887795	0.252358	0.984285	0.000517085	0.00252224	4.44283	4.44595	5.49792	5.14688	5.64854	5.6091	5.53681	5.32055
104161	0.0354747	0.796326	0.843235	-0.30337	0.0783372	0.239239	0.0425593	0.786869	0.870442	0.381404	0.0209054	0.0386984	8.15211	8.41489	8.20648	8.43791	8.34526	8.37593	8.69434	8.63312
104163	1.2076	0.0654347	0.118904	0.497065	0.478742	0.668491	-1.03985	0.142494	0.337577	-0.329315	0.593917	0.650366	-2.61727	-1.49224	-1.29649	-0.373828	-1.85237	-1.92747	-2.78662	-1.98141
104175	-0.0206794	0.885251	0.912388	0.279136	0.10963	0.272613	0.331989	0.0754165	0.22946	0.0321733	0.813391	0.8457	3.93219	3.70898	3.79702	3.80337	4.15513	4.10962	3.94583	3.75736
104189	0.089326	0.679715	0.745346	0.920783	0.00685122	0.0671397	0.449319	0.0951877	0.263733	-0.382138	0.116373	0.162592	3.99908	3.63705	3.91296	3.90145	4.32422	4.38843	3.69988	3.16427
104242	0.454486	0.288209	0.3772	0.0860391	0.868108	0.935503	-0.678656	0.207957	0.424085	-0.310209	0.476063	0.537078	-0.172484	-0.0677398	-0.196959	0.921628	0.0221008	-0.705079	-0.464689	-0.396445
104246	-0.454904	0.566276	0.644888	-0.115114	0.879391	0.942487	1.31333	0.153346	0.352531	0.973537	0.192735	0.250182	-2.08675	-3.41824	-4.10385	-2.2483	-1.85237	-1.92747	-2.04965	-1.49598
104247	2.60709	0.00322517	0.0153798	0.862575	0.186076	0.377203	-0.318293	0.588907	0.736736	1.42622	0.0481048	0.0772057	-5.78719	-5.74017	-2.51889	-3.83326	-3.43733	-3.51243	-4.37158	-4.30334
104248	1.7941	0.00521456	0.0180235	0.862575	0.0889441	0.239239	0.494694	0.289907	0.482973	1.42622	0.0148992	0.0294382	-5.78719	-5.74017	-4.10385	-3.83326	-3.43733	-3.51243	-4.37158	-4.30334
104249	0.314788	0.27582	0.363576	0.0433499	0.875824	0.94058	0.712306	0.05126	0.182693	0.983744	0.00480108	0.0131602	0.321331	0.142478	0.419713	0.690303	1.51687	1.01113	1.18301	1.25125
104250	1.78305	0.00038403	0.00409497	0.757012	0.0101143	0.081822	1.47488	0.000667307	0.0228665	2.50092	3.12355e-05	0.000501366	1.87814	1.51722	3.77267	3.15543	4.84344	5.06877	4.13225	4.27031
104254	-0.313202	0.430056	0.5185	-1.05131	0.0977295	0.253973	-1.13711	0.082652	0.241466	-0.399007	0.30361	0.368356	1.84943	2.57725	1.67751	2.14402	0.263109	1.24245	1.85724	1.76275
104257	0.784006	0.00352334	0.016275	-0.410855	0.0531415	0.203173	-0.214511	0.255018	0.481934	0.98035	0.00116213	0.00451977	5.17136	4.90098	5.74007	5.89976	5.69966	5.51271	6.19352	5.84005
104260	-0.697061	0.0223695	0.0528716	-0.358737	0.230617	0.428981	-0.471998	0.13555	0.328445	-0.810322	0.0106102	0.0246628	5.10079	4.66604	4.45457	3.88784	3.76234	3.66748	4.14806	3.99587
104262	2.60709	0.00528283	0.0181613	1.36626	0.0712456	0.238613	0.185387	0.768864	0.858963	1.42622	0.0668523	0.102144	-5.78719	-5.74017	-2.51889	-3.83326	-3.43733	-2.51243	-4.37158	-4.30334
104269	-0.60145	0.13219	0.204965	0.297611	0.45096	0.646411	0.814218	0.0922171	0.258199	-0.0848432	0.786546	0.822301	2.46547	1.80673	1.82689	1.21113	2.49341	2.21549	2.03781	2.0717
104273	1.40594	0.00101175	0.0072812	-0.54356	0.100286	0.258144	-0.616267	0.0749205	0.22865	1.33323	0.0011233	0.00439077	0.0456961	0.0411946	1.32242	1.59301	0.650132	1.01113	1.55916	1.18852
104275	-0.449752	0.02299	0.053952	0.332871	0.098133	0.254634	0.333634	0.107585	0.283694	-0.448989	0.0187756	0.035415	3.57694	3.70485	3.0357	3.36641	3.52845	3.52099	3.25047	3.13129
104285	1.05935	0.00307409	0.0150317	-0.920401	0.00699155	0.0677532	0.0300416	0.910109	0.949237	2.00979	4.4756e-05	0.000595549	2.22961	2.54061	3.24488	3.66659	3.61795	3.33306	4.5443	4.2397
104287	0.587185	0.515982	0.599451	-0.0103899	0.992276	0.996115	-0.151525	0.88911	0.936095	0.44605	0.61297	0.666886	1.63066	2.46441	1.18155	4.27003	2.49341	2.46485	2.70524	2.26652
104294	-0.471731	0.00950446	0.028025	-0.380946	0.0282257	0.14324	-0.256955	0.099803	0.27142	-0.34774	0.0337669	0.0574298	6.8797	6.88851	6.53187	6.29474	6.05652	6.25409	6.46526	6.60731
104298	-0.202592	0.428418	0.516786	-0.792104	0.0239966	0.129897	-0.729134	0.0356414	0.148131	-0.139623	0.569132	0.626617	8.28032	7.96341	8.29088	7.53361	7.10473	7.27791	8.03914	7.92638
104299	2.53161	0.000280926	0.00347497	0.18373	0.516396	0.700191	1.33227	0.00375649	0.0470981	3.68015	2.15854e-05	0.000427599	0.954273	2.07362	4.13932	3.92829	5.24566	5.49599	5.2596	5.11662
104300	-0.214416	0.796706	0.843488	-1.34166	0.138898	0.313519	0.514332	0.581413	0.732041	1.64158	0.0539357	0.0852459	-3.46527	-2.5075	-4.10385	-2.2483	-1.85237	-3.51243	-1.20165	-1.49598
104303	1.7941	0.00521456	0.0180235	0.862575	0.0889441	0.239239	0.494694	0.289907	0.482973	1.42622	0.0148992	0.0294382	-5.78719	-5.74017	-4.10385	-3.83326	-3.43733	-3.51243	-4.37158	-4.30334
104308	0.629462	0.183928	0.263961	0.166403	0.760141	0.871928	-0.70316	0.212991	0.430163	-0.240101	0.603441	0.658439	-0.501792	-0.530712	-0.0163865	0.254204	0.0221008	-1.19051	-1.20165	-0.303335
104312	-0.207259	0.318432	0.408386	-2.9703	2.3115e-06	0.00194672	-0.0557275	0.780552	0.866667	2.70731	3.96549e-06	0.000247812	5.86968	6.32895	5.73062	6.05091	5.85959	5.81175	8.88035	8.72992
104315	2.0538	0.00232565	0.0125323	-1.06127	0.0247018	0.132453	0.212884	0.623978	0.760989	3.32795	7.65776e-05	0.000784575	-1.39488	-2.28073	0.540007	-0.132819	0.46956	0.394457	1.55916	1.42459
104316	1.83562	5.41358e-05	0.00159942	0.288777	0.171678	0.358702	0.222614	0.283886	0.482973	1.76945	6.09834e-05	0.000700575	3.13465	2.79511	4.82393	4.77777	4.82476	5.21889	4.84517	4.62444
104318	-1.46049	0.00237975	0.012692	-0.529948	0.222108	0.419607	-1.45762	0.00792855	0.0684275	-2.38816	0.000226591	0.00149355	10.1256	10.154	9.01168	8.31871	7.3391	7.1038	7.23344	8.27763
104322	-1.57106	0.0641951	0.117394	-0.402006	0.749585	0.866519	-1.62541	0.199965	0.413581	-2.79446	0.0130595	0.0289629	4.39644	2.99793	2.79097	1.37619	0.263109	0.735494	0.757703	1.05422
104329	1.87637	0.0034861	0.0161593	1.0791	0.0325512	0.155329	0.798042	0.0889669	0.252775	1.59531	0.00732482	0.0184022	-1.69973	-1.83327	0.144078	0.0736314	1.08623	0.735494	-0.67114	0.340521
104333	-0.271898	0.555783	0.635485	-0.249507	0.625644	0.782448	-0.00645268	0.990162	0.994578	-0.0288435	0.947113	0.957704	-2.20223	-1.59775	-2.10385	-2.2483	-2.43733	-1.92747	-1.56422	-2.30334
104334	0.627057	0.51579	0.599344	0.0644103	0.946909	0.971322	0.494694	0.625009	0.761611	1.05734	0.27108	0.333981	-3.46527	-5.74017	-4.10385	-3.83326	-3.43733	-3.51243	-2.78662	-4.30334
104335	-0.193618	0.187594	0.267838	0.0829837	0.611026	0.771768	-0.350368	0.0622525	0.205488	-0.62697	0.00287527	0.00891176	4.51545	4.30012	4.29276	4.12674	3.92899	3.80045	3.80335	3.75736
104337	1.03047	0.000834446	0.00645911	0.772068	0.00581896	0.061302	0.308738	0.144767	0.340781	0.567135	0.0159363	0.0310405	2.77886	3.11626	3.83279	4.13828	4.25616	4.31411	3.46762	3.56085
104338	0.549767	0.0589625	0.109759	0.30295	0.369162	0.571953	-0.441649	0.1919	0.403927	-0.194833	0.467969	0.529449	2.16117	2.63052	2.71633	3.20016	2.49341	2.50993	2.10415	2.29658
104340	1.56363	0.0382743	0.0790384	0.025573	0.962496	0.9781	1.2743	0.0680159	0.216548	2.81235	0.00190173	0.00645349	-4.20223	-2.93281	-1.78192	-2.2483	-0.267406	-1.19051	-0.912148	-0.602895
104343	-0.850623	0.0523806	0.100259	0.394776	0.435849	0.633075	-0.0830739	0.86513	0.921241	-1.32847	0.00985647	0.0232872	2.79401	2.54985	2.08598	1.52429	1.08623	2.37021	1.55916	1.12293
104348	1.18696	0.0140711	0.0376256	-0.324706	0.393823	0.594269	0.229393	0.57285	0.725853	1.74105	0.00136661	0.00508321	0.927052	1.10532	1.67751	2.7961	2.44531	2.4183	2.63965	2.87657
104349	-0.834085	0.00343214	0.0160024	-0.595039	0.0338403	0.157781	-0.39956	0.130818	0.320755	-0.638607	0.00843596	0.0205661	4.4137	4.26966	3.7227	3.26477	3.19203	3.02672	3.58842	3.82079
104350	2.02838	0.000233211	0.00316834	-0.0244452	0.926964	0.963143	0.974531	0.00998515	0.076342	3.02736	1.86047e-05	0.00040629	4.54484	5.41149	7.0389	6.9749	7.94907	8.01358	8.00915	8.00244
104354	3.96673	0.00058881	0.00524089	-0.722114	0.2956	0.499259	-1.67794	0.0331326	0.14247	3.01091	0.0029111	0.00898085	-5.78719	-5.74017	-2.51889	-1.0259	-3.43733	-3.51243	-2.78662	-2.71837
104357	-1.36172	0.00902613	0.0270354	-0.359549	0.449252	0.644814	0.0597114	0.904648	0.945855	-0.942456	0.0242052	0.0436293	2.8458	3.59299	1.72904	1.99963	1.98893	1.84512	2.19828	2.35488
104361	-0.292666	0.109572	0.177528	-0.207448	0.279131	0.482088	0.107499	0.583009	0.732917	0.0222805	0.881659	0.904002	3.78076	3.93049	3.44305	3.69812	3.5739	3.76369	3.76285	3.99587
104363	0.601792	0.0242496	0.0561155	-0.0237615	0.919111	0.960126	0.165577	0.510108	0.676579	0.791131	0.00535722	0.0143629	1.92017	1.72744	2.236	2.64247	2.77212	2.4183	2.63965	2.59148
104364	0.201753	0.458532	0.545939	0.592834	0.101763	0.260306	0.183363	0.571672	0.725227	-0.207717	0.448769	0.510971	0.98099	0.82969	1.18155	1.02472	0.954987	1.61685	0.837874	0.554646
104373	-0.563216	0.0245802	0.0567046	0.282781	0.235701	0.432886	-0.709557	0.0140158	0.0898454	-1.55555	0.000194776	0.00134774	5.63224	5.92739	5.13216	5.30373	4.78667	4.23576	4.17145	4.27787
104376	1.07742	0.0654598	0.118924	1.3256	0.0401084	0.17289	0.598462	0.275097	0.482973	0.35028	0.503687	0.564295	-1.36093	-2.03973	-0.580287	-0.663334	-0.629976	0.575029	-1.20165	-1.49598
104387	3.67624	0.0051326	0.0180235	1.27482	0.160226	0.342796	0.357621	0.654079	0.783766	2.75904	0.0214383	0.0395193	-4.20223	-2.03973	0.540007	0.559058	0.263109	1.53196	0.383308	-1.13341
104395	-1.32617	0.0306246	0.0668387	0.718853	0.250356	0.449055	0.424149	0.486122	0.65633	-1.62088	0.0128229	0.0286134	4.63802	3.57045	3.11532	2.39556	3.38285	3.02672	2.28663	2.68535
104397	5.89556	3.124e-07	0.000372881	3.46834	1.37685e-06	0.00149401	0.589637	0.00546395	0.0572111	3.01685	3.44739e-05	0.00051992	-1.03231	-0.530712	5.08844	5.13541	5.79389	5.6091	2.42284	2.03651
104405	-0.815419	0.0429686	0.0863423	-0.341099	0.38459	0.586491	0.35432	0.399489	0.589334	-0.12	0.690071	0.736734	0.0456961	0.563616	-0.644418	-0.373828	-0.267406	-0.0530023	0.272277	0.0889822
104410	-0.416858	0.0177606	0.044371	-0.0115452	0.935991	0.966885	-0.218185	0.166528	0.370604	-0.623497	0.00268628	0.00846496	5.31413	5.32525	4.88199	4.92496	4.57948	4.78677	4.82071	4.57011
104412	2.84611	0.00014276	0.00245531	2.42383	0.000278792	0.0154775	0.998123	0.0121467	0.083742	1.42041	0.00905147	0.0217688	-0.929213	-1.34785	2.00468	1.37619	2.67119	2.74307	0.0207379	0.554646
104413	-1.27135	9.79803e-05	0.00208838	-2.00683	2.66976e-05	0.00561712	-0.93244	0.00289691	0.0417622	-0.196959	0.159597	0.212653	4.68346	4.84009	3.53278	3.44287	2.75249	2.37021	4.60284	4.52639
104414	-0.366575	0.378031	0.468458	0.293283	0.503879	0.690743	-0.100367	0.815993	0.889106	-0.760225	0.0952234	0.137345	5.61635	4.66816	5.18847	4.33165	4.80584	4.54826	4.29731	4.46815
104417	-0.931791	0.0344802	0.072932	-0.169424	0.651548	0.801657	0.329651	0.420724	0.608993	-0.432716	0.219273	0.278905	4.44042	5.27595	3.86769	3.99329	4.36357	4.1529	4.12428	4.73284
104420	1.29381	0.000276672	0.00345352	0.11355	0.551664	0.725184	0.232111	0.2614	0.482973	1.41237	0.00012945	0.00105613	2.56595	2.9568	3.96761	4.14973	4.33746	4.23576	4.08375	4.26272
104426	3.06787	1.27621e-05	0.000934529	3.2166	9.193e-06	0.00349535	0.405668	0.135241	0.327898	0.25694	0.341141	0.405721	4.90716	5.66178	8.47145	8.22439	8.66792	8.84649	5.55175	5.53114
104432	2.30283	0.00710371	0.0226893	-0.828956	0.163779	0.347965	0.0471238	0.937628	0.964468	3.17891	0.000867779	0.0036484	-0.00583417	1.91089	2.92957	3.60137	3.10183	3.47625	4.14017	4.10181
104441	-0.990209	0.188818	0.269198	-0.972023	0.356919	0.559957	-1.75782	0.114598	0.294919	-1.77601	0.0428324	0.07013	0.362553	0.526621	-1.29649	0.254204	-3.43733	-1.19051	-2.04965	-0.602895
104445	-0.00727155	0.978384	0.983658	0.34916	0.283314	0.486636	0.338381	0.314061	0.508565	-0.0180503	0.943295	0.954571	2.43681	1.89646	2.30554	1.99963	2.44531	2.55366	2.22833	2.0717
104452	1.29173	0.0400919	0.0818711	0.862575	0.141179	0.316274	0.494694	0.369134	0.559917	0.923848	0.112766	0.158331	-4.78719	-5.74017	-4.10385	-3.83326	-3.43733	-3.51243	-4.37158	-4.30334
104453	1.9132	0.0578969	0.108198	1.15207	0.200723	0.396202	0.797546	0.358582	0.550557	1.55867	0.105717	0.149987	-5.78719	-5.00898	-4.10385	-2.83326	-1.85237	-3.51243	-4.37158	-3.30334
104454	2.36259	4.69115e-06	0.000617737	-0.059171	0.709836	0.8396	0.0787101	0.637843	0.771122	2.50048	2.5247e-06	0.000242508	1.10762	1.15465	3.45839	3.53306	3.43303	3.70673	3.69988	3.56085
104459	0.197873	0.280669	0.368991	-0.0789736	0.673933	0.816287	0.399961	0.0842185	0.244315	0.676807	0.00369106	0.010756	2.86744	2.71516	3.01509	2.96116	3.27691	3.49879	3.61426	3.31872
104464	-0.968807	0.0701263	0.125195	0.1919	0.715682	0.843109	0.691178	0.238494	0.461895	-0.469529	0.295425	0.359779	0.143543	0.0927249	-1.29649	-0.373828	-0.267406	-0.0530023	-0.912148	0.220227
104466	1.7941	0.00521456	0.0180235	0.862575	0.0889441	0.239239	0.494694	0.289907	0.482973	1.42622	0.0148992	0.0294382	-5.78719	-5.74017	-4.10385	-3.83326	-3.43733	-3.51243	-4.37158	-4.30334
104469	2.31296	0.019785	0.0481202	0.33507	0.616052	0.775082	0.801121	0.288355	0.482973	2.77902	0.00652524	0.0168037	-2.97984	-0.882184	-0.0163865	0.810597	0.810597	1.53196	1.12027	0.554646
104471	0.525193	0.247535	0.334999	0.279214	0.578401	0.746368	0.142624	0.778556	0.865497	0.388603	0.36796	0.431813	1.56153	2.08638	1.82689	2.93493	2.82946	2.15999	2.4486	1.96345
104474	1.7941	0.00521456	0.0180235	0.862575	0.0889441	0.239239	0.494694	0.289907	0.482973	1.42622	0.0148992	0.0294382	-5.78719	-5.74017	-4.10385	-3.83326	-3.43733	-3.51243	-4.37158	-4.30334
104483	0.148765	0.497845	0.582348	0.0821739	0.746289	0.864742	-0.398111	0.148081	0.345347	-0.331519	0.16252	0.215994	4.54484	3.98605	4.30129	4.53743	4.07837	3.95517	3.93676	3.93028
104484	2.49228	4.67867e-06	0.000617737	0.838028	0.0015311	0.0326926	0.938321	0.000905738	0.0258298	2.59258	3.4343e-06	0.000242508	2.46547	2.69029	5.20676	4.92496	5.94421	6.07065	5.29553	5.04318
104492	0.625162	0.0479246	0.0936984	-0.0717741	0.795831	0.891761	0.223892	0.449229	0.632961	0.920827	0.00838281	0.0204727	3.64535	3.73759	3.946	4.72516	4.49931	4.58032	4.78071	4.4415
104495	3.72333	0.000312835	0.00367519	0.268618	0.595091	0.759517	0.639093	0.225893	0.445895	4.0938	0.000192071	0.00134115	1.57913	3.2285	5.73693	6.49654	6.71369	6.80385	6.61213	6.36821
104497	-0.102108	0.917512	0.938087	0.439239	0.656327	0.804799	1.15451	0.294861	0.488339	0.613164	0.508077	0.568734	-2.08675	-1.83327	-0.40341	-3.83326	-1.1154	-0.705079	-1.20165	-1.49598
104499	0.53154	0.462797	0.549865	-0.44987	0.558291	0.731397	0.0281541	0.971826	0.983661	1.00956	0.161982	0.215398	-0.44592	-1.60266	-0.592887	-0.373828	-0.366942	-0.54896	0.844099	-0.883796
104504	0.175275	0.81205	0.856012	-1.38321	0.0828579	0.239239	0.549958	0.511818	0.67788	2.10844	0.00942929	0.0224692	-1.69973	0.0411946	-0.933924	-0.373828	-0.629976	0.394457	1.12027	1.42459
104507	0.124966	0.746588	0.802095	0.713365	0.110384	0.273348	0.91209	0.0599388	0.200961	0.323691	0.395954	0.459726	-1.69973	-1.34785	-1.29649	-1.51133	-0.267406	-0.705079	-0.912148	-1.49598
104515	-1.83418	0.00028089	0.00347497	-0.836824	0.0820993	0.239239	-1.45339	0.0100858	0.076727	-2.45075	6.76403e-05	0.000741974	3.87636	4.08161	2.46601	1.78145	0.810597	0.575029	1.30085	1.76275
104517	0.317245	0.270709	0.358503	-0.195758	0.52838	0.709203	-0.0164876	0.958713	0.976715	0.496515	0.0901419	0.131132	3.33434	3.84292	3.6577	4.18355	3.6607	4.10962	4.17145	3.99587
104532	-0.933908	0.0168162	0.0426788	-0.502789	0.132201	0.305334	0.855985	0.046294	0.171925	0.424866	0.0996859	0.142805	2.01371	2.08638	0.754132	1.52429	2.17738	1.77297	2.31492	2.63918
104534	3.37578	0.000119036	0.00224943	0.862575	0.0905038	0.241667	-1.08699	0.0331586	0.14247	1.42622	0.0152927	0.0300269	-5.78719	-5.74017	-2.51889	-2.2483	-3.43733	-3.51243	-4.37158	-4.30334
104539	-0.642564	0.125	0.196264	0.831013	0.109875	0.272888	0.458997	0.341046	0.534006	-1.01458	0.0302808	0.0525795	1.87814	1.74365	1.388	0.921628	1.92022	1.34555	1.35634	0.220227
104540	0.637817	0.0202942	0.0490944	0.302545	0.18769	0.379321	0.895778	0.00428394	0.0504271	1.23105	0.000904733	0.00374442	4.55154	5.03545	5.24266	5.62412	6.26484	6.38994	6.09704	5.95287
104542	2.16447	0.000295395	0.00356635	-0.565415	0.083556	0.239239	0.0353305	0.909615	0.949237	2.76522	4.37635e-05	0.000592246	-0.832998	-0.785969	1.33577	1.37619	1.31756	1.46026	2.22833	1.67394
104544	-0.43368	0.152072	0.22746	-0.452886	0.262276	0.463308	-0.736831	0.0925898	0.258877	-0.717626	0.0323524	0.0554826	3.19865	2.96374	3.01509	2.23283	2.05452	1.77297	2.16758	2.56703
104549	-0.675576	0.0342474	0.0726409	-0.273541	0.356963	0.559957	0.382929	0.252389	0.478254	-0.0191059	0.931604	0.945547	3.1227	3.53828	2.66433	2.64247	2.86645	3.20181	3.51716	3.09754
104550	2.53423	0.000723385	0.00590583	0.105248	0.82011	0.907792	-0.775771	0.115958	0.297011	1.65322	0.0078848	0.0195296	-2.08675	-1.2166	0.940545	0.810597	0.263109	-0.0530023	0.383308	-0.396445
104551	1.7941	0.00521456	0.0180235	0.862575	0.0889441	0.239239	0.494694	0.289907	0.482973	1.42622	0.0148992	0.0294382	-5.78719	-5.74017	-4.10385	-3.83326	-3.43733	-3.51243	-4.37158	-4.30334
104552	1.57027	0.00632092	0.0207855	-0.679928	0.0973336	0.253459	0.44083	0.31047	0.505164	2.69103	0.000172704	0.0012651	0.362553	-0.454763	1.2537	1.83917	1.77212	2.15999	2.82809	2.46485
104563	-0.968293	0.000152543	0.00255008	-0.456197	0.00935084	0.0785998	0.308859	0.0588584	0.198905	-0.203237	0.105645	0.149905	4.75293	4.88646	3.85615	3.84622	4.22801	4.0949	4.58552	4.64795
104572	2.4991	0.00325	0.0154488	-0.47102	0.418703	0.61684	-0.600016	0.316604	0.511434	2.3701	0.00394739	0.0113423	-2.97984	-2.28073	-0.644418	0.414668	-0.267406	-1.19051	-0.464689	-0.0554077
104575	-0.80291	0.032597	0.0701167	0.0114232	0.970239	0.981848	0.614598	0.0798251	0.236601	-0.199735	0.520341	0.580467	6.40356	5.98477	5.8165	4.9579	6.02824	5.98542	5.89169	6.09861
104581	-0.132282	0.739146	0.796609	-0.385678	0.493505	0.680823	-0.778188	0.190965	0.402714	-0.524792	0.215464	0.274851	2.70065	1.86717	2.43531	1.83917	1.51687	1.24245	1.6057	1.92548
104582	1.41942	0.0905322	0.153341	-0.321923	0.67397	0.816287	0.0604504	0.940087	0.965901	1.80179	0.0334416	0.0570226	1.36255	3.67135	3.90178	3.95464	3.80107	4.16705	4.14017	4.4813
104585	1.12303	0.0906022	0.153438	0.880249	0.150463	0.329848	1.18073	0.07815	0.233843	1.42351	0.0370563	0.0619386	-2.61727	-2.93281	-1.78192	-1.51133	0.263109	-1.19051	-1.56422	-1.13341
104586	0.242386	0.128374	0.200323	0.00154434	0.991458	0.995463	0.429737	0.0233837	0.117817	0.670579	0.00218836	0.00717985	4.40387	4.42223	4.52915	4.79245	4.9763	5.19147	5.14609	5.02085
104592	-0.172474	0.786082	0.834757	-1.0808	0.171635	0.358702	-0.668652	0.392222	0.582357	0.239669	0.690672	0.73731	-1.39488	-2.28073	-1.78192	-2.2483	-3.43733	-1.92747	-2.04965	-1.13341
104593	1.51843	0.0979211	0.163209	0.366437	0.722071	0.848358	-1.67794	0.111903	0.290618	-0.525939	0.566858	0.624344	-4.20223	-2.41824	-2.51889	-1.0259	-3.43733	-3.51243	-4.37158	-3.30334
104595	0.571093	0.0046289	0.0180235	-0.0433575	0.752193	0.867377	0.00734037	0.957048	0.975881	0.621791	0.00310289	0.00945312	5.01613	5.34398	5.75258	5.74982	5.77942	5.73786	5.83177	5.77214
104610	1.26692	0.0088549	0.0267372	-0.874475	0.0288629	0.144914	0.406988	0.297983	0.492075	2.54838	8.96511e-05	0.000847249	-0.143338	-0.785969	1.02543	0.559058	1.42065	1.01113	2.13622	2.03651
104612	1.81882	0.0810014	0.140426	2.01419	0.0482834	0.193173	1.63149	0.0923844	0.258425	1.43612	0.149602	0.201084	-5.78719	-4.1552	-2.51889	-3.83326	-1.1154	-1.92747	-2.78662	-4.30334
104613	0.529428	0.0197145	0.0480283	-1.16623	0.000880056	0.0253728	-0.531323	0.0388585	0.155695	1.16433	0.000292175	0.00174545	3.89404	3.69238	4.12015	4.54612	3.82006	3.76369	5.03569	4.87906
104615	1.02213	0.0235321	0.0548484	-0.015159	0.96801	0.980857	-0.00480213	0.990067	0.994566	1.03249	0.020554	0.038113	-1.53927	-1.83327	-0.933924	-0.373828	-0.629976	-0.705079	-0.464689	-0.843904
104627	0.212834	0.49433	0.579199	0.0867656	0.868831	0.9357	-1.91498	0.00488214	0.0541573	-1.78891	0.00288219	0.00892626	3.62007	4.0688	4.14882	3.95464	2.86645	1.44176	2.25778	1.84641
104628	0.0102877	0.933428	0.95055	0.0199526	0.880385	0.942843	-0.387627	0.021542	0.11313	-0.397292	0.0145357	0.0294382	4.97519	5.11704	4.97029	5.14688	4.64482	4.69214	4.70256	4.59451
104629	2.70791	0.000627046	0.00540782	-0.228816	0.597228	0.760618	0.288649	0.505525	0.672756	3.22538	0.000245739	0.00156101	2.14944	3.52428	5.28201	5.80155	5.72002	5.93671	6.06201	6.05312
104634	-0.684887	0.041825	0.084669	-0.549103	0.219389	0.41907	-1.03856	0.0391893	0.156512	-1.17434	0.00479132	0.0131404	2.58349	3.0575	2.12497	2.14402	1.31756	0.879883	1.40978	1.88649
104635	-2.21879	0.0155858	0.0404859	-2.0619	0.099277	0.256821	-2.25331	0.0798785	0.236642	-2.4102	0.00953013	0.0226642	2.20716	2.99115	0.651038	0.0736314	-3.43733	-0.342509	0.151982	0.220227
104636	0.427897	0.254668	0.341657	-0.637789	0.128284	0.299412	0.176237	0.676746	0.799668	1.24192	0.00510931	0.0138287	1.86386	2.54985	2.43531	2.85324	3.07046	2.55366	3.65633	3.22805
104637	0.627422	0.20398	0.286633	-0.498809	0.311956	0.515294	-0.129187	0.785575	0.8697	0.997043	0.0628827	0.0971483	4.30952	5.04365	4.66764	5.95953	5.3075	5.04599	5.74346	5.60506
104640	-0.0899123	0.469813	0.556318	0.0311715	0.808016	0.899299	-0.139045	0.303623	0.497398	-0.260129	0.0639592	0.0983912	5.07777	4.94195	4.82984	5.01536	4.73759	4.82296	4.74476	4.75466
104655	-1.02522	0.0902481	0.152968	-0.204465	0.764795	0.875056	-0.579256	0.408838	0.598097	-1.40001	0.0328355	0.0561657	-0.832998	0.0927249	-1.29649	-1.51133	-1.43733	-2.51243	-2.04965	-1.49598
104658	-0.906117	0.0274919	0.0616926	0.152926	0.749638	0.866519	-1.04355	0.0529388	0.185846	-2.1026	0.000807393	0.00346282	1.03299	1.41971	0.540007	0.0736314	-1.1154	-0.342509	-0.912148	-0.843904
104660	-1.38493	0.00282242	0.0142322	-0.621012	0.208583	0.406871	-1.14044	0.0392378	0.156584	-1.90436	0.000610928	0.00282025	3.92189	3.97236	2.43531	2.7059	1.60706	1.24245	1.51106	2.59148
104666	-0.433364	0.0642494	0.117458	-0.445753	0.0857409	0.239239	-0.094248	0.696659	0.812678	-0.0818585	0.659895	0.709303	3.98924	4.32996	3.5472	3.92829	3.70222	3.56438	3.98157	4.17645
104671	1.7941	0.00521456	0.0180235	0.862575	0.0889441	0.239239	0.494694	0.289907	0.482973	1.42622	0.0148992	0.0294382	-5.78719	-5.74017	-4.10385	-3.83326	-3.43733	-3.51243	-4.37158	-4.30334
104672	1.7941	0.027878	0.0622665	1.66128	0.0326051	0.155329	1.2934	0.0747361	0.228321	1.42622	0.0623953	0.0964702	-5.78719	-5.74017	-4.10385	-3.83326	-3.43733	-1.92747	-4.37158	-4.30334
104681	-0.126862	0.613212	0.686485	-0.258221	0.403278	0.602593	-0.291643	0.36139	0.552806	-0.160284	0.508211	0.56883	3.49126	4.00635	3.47358	3.78879	3.13252	3.52099	3.68912	3.48457
104682	-0.29786	0.125611	0.196809	-0.240147	0.216416	0.415497	0.0123878	0.946995	0.970326	-0.0453254	0.790374	0.825797	4.94328	5.10454	4.57915	4.88442	4.79629	4.68232	5.1382	4.8182
104685	0.0519115	0.683927	0.748863	-0.332164	0.04706	0.191218	0.0758231	0.616359	0.755712	0.459898	0.00543891	0.0145297	3.62007	3.46685	3.57563	3.61795	3.69607	3.64744	3.97564	4.03206
104689	-0.533351	0.0459442	0.0907701	-0.459452	0.120323	0.28803	0.0276169	0.923218	0.956307	-0.0462816	0.812744	0.845321	2.31609	2.5313	1.62407	2.18911	1.92022	1.91383	2.36989	2.38317
104696	1.70081	0.0023102	0.0124828	1.17261	0.0136487	0.0963837	0.149281	0.676309	0.799408	0.677483	0.0946279	0.136603	4.02177	4.36181	5.34942	6.43236	6.123	5.96127	4.92534	4.81301
104699	0.175331	0.339763	0.429326	-0.138288	0.493823	0.681104	0.114439	0.589744	0.737319	0.428058	0.0328177	0.0561433	3.29229	3.10219	3.26247	3.49766	3.59609	3.38238	3.76285	3.48457
104700	3.59562	0.000119775	0.00224943	0.274201	0.433743	0.63113	0.257342	0.474294	0.65041	3.57876	0.000109778	0.000956963	-0.360929	1.22562	4.02027	4.01849	4.19929	4.35175	4.09194	3.91098
104709	1.97989	0.0651776	0.118646	0.862575	0.435035	0.632316	-1.08699	0.298291	0.492328	0.0303256	0.97594	0.981036	-5.78719	-2.93281	-2.51889	-2.2483	-3.43733	-3.51243	-4.37158	-4.30334
104714	-0.429665	0.0728746	0.129051	0.142793	0.500969	0.687938	0.0795027	0.70414	0.816887	-0.492955	0.0468703	0.0756619	6.24451	5.84855	5.8547	5.37863	5.69453	5.69945	5.53981	5.56857
104718	0.99765	0.151844	0.227204	0.862575	0.221578	0.41907	0.494694	0.46355	0.640386	0.629769	0.341647	0.405721	-4.20223	-5.74017	-4.10385	-3.83326	-3.43733	-3.51243	-4.37158	-4.30334
104719	1.7941	0.00521456	0.0180235	0.862575	0.0889441	0.239239	0.494694	0.289907	0.482973	1.42622	0.0148992	0.0294382	-5.78719	-5.74017	-4.10385	-3.83326	-3.43733	-3.51243	-4.37158	-4.30334
104722	0.99765	0.248762	0.336075	1.64821	0.0793411	0.239239	1.28033	0.152025	0.350611	0.629769	0.452179	0.514461	-4.20223	-5.74017	-4.10385	-3.83326	-1.85237	-3.51243	-4.37158	-4.30334
104727	-0.614814	0.197067	0.278563	0.862575	0.154608	0.335346	-0.502229	0.359396	0.551312	-1.97962	0.00443999	0.012404	-1.97984	-2.74017	-3.10385	-2.83326	-3.43733	-3.51243	-4.37158	-4.30334
104732	-0.563885	0.0309156	0.0673018	-0.198073	0.436822	0.634107	-0.63876	0.0350688	0.147088	-1.00457	0.00244226	0.00784679	4.88964	5.37813	4.60005	4.53743	3.70222	4.1529	4.0755	4.1845
104734	-1.6984	0.062452	0.114929	3.91921	0.0535775	0.204076	-0.82517	0.472902	0.648874	-6.44278	0.00409663	0.01167	5.1227	3.47172	1.91852	3.36641	1.77212	1.77297	-2.78662	-1.49598
104736	0.615434	0.0308397	0.0672136	-0.263014	0.304276	0.507737	0.198942	0.457669	0.639291	1.07739	0.00163442	0.00578027	3.28695	2.93579	3.50348	3.98052	3.72254	4.12419	4.17145	4.20842
104741	1.78758	0.193512	0.274579	-0.781521	0.537908	0.715452	0.0613125	0.963606	0.97947	2.63042	0.0573657	0.0899051	0.143543	4.35655	4.30129	3.69812	4.03027	4.12419	4.81577	4.90368
104742	0.99765	0.151844	0.227204	0.862575	0.221578	0.41907	0.494694	0.46355	0.640386	0.629769	0.341647	0.405721	-4.20223	-5.74017	-4.10385	-3.83326	-3.43733	-3.51243	-4.37158	-4.30334
104744	-0.788717	0.0509763	0.0980902	-0.0408019	0.927262	0.963228	-0.244704	0.593744	0.740376	-0.992618	0.0198929	0.037064	3.36001	2.83348	2.19993	2.43353	2.44531	1.69702	2.3966	1.80519
104746	0.0422717	0.860638	0.89319	-0.0170018	0.952017	0.973633	-0.821501	0.0204678	0.110196	-0.762228	0.017947	0.0341162	5.16336	4.68924	4.72587	5.22473	4.01388	4.27547	4.06721	4.26272
104751	0.0649014	0.756805	0.810664	0.220155	0.339342	0.54353	0.215101	0.361281	0.552711	0.0598473	0.768296	0.806471	4.33304	4.24425	4.05097	4.68638	4.62337	4.51547	4.35974	4.33691
104756	-0.845335	0.00818447	0.0251454	0.161586	0.536263	0.714448	-0.137723	0.598811	0.743206	-1.14464	0.00179615	0.00617834	5.34787	4.96978	4.55793	4.04326	4.19929	4.1529	3.87159	4.16019
104758	1.7941	0.00521456	0.0180235	0.862575	0.0889441	0.239239	0.494694	0.289907	0.482973	1.42622	0.0148992	0.0294382	-5.78719	-5.74017	-4.10385	-3.83326	-3.43733	-3.51243	-4.37158	-4.30334
104761	1.41571	0.00274942	0.0140064	0.658292	0.0706215	0.237448	0.472861	0.173132	0.380361	1.23028	0.00496988	0.0135281	0.98099	0.368359	1.82689	2.39556	2.49341	2.63731	1.96827	1.84641
104765	0.99765	0.151844	0.227204	0.862575	0.221578	0.41907	0.494694	0.46355	0.640386	0.629769	0.341647	0.405721	-4.20223	-5.74017	-4.10385	-3.83326	-3.43733	-3.51243	-4.37158	-4.30334
104766	-0.279672	0.489588	0.575037	-0.174486	0.749552	0.866519	-1.25251	0.0465294	0.172316	-1.3577	0.0148071	0.0294382	0.321331	-0.3139	-0.40341	-0.132819	-1.1154	-1.92747	-1.56422	-1.13341
104769	1.7941	0.00521456	0.0180235	0.862575	0.0889441	0.239239	0.494694	0.289907	0.482973	1.42622	0.0148992	0.0294382	-5.78719	-5.74017	-4.10385	-3.83326	-3.43733	-3.51243	-4.37158	-4.30334
104770	-0.501331	0.00151516	0.00931251	-0.0869649	0.427414	0.624892	-0.138748	0.222804	0.442346	-0.553114	0.000893331	0.00371397	7.48733	7.58781	7.01704	7.05472	6.92615	6.86803	7.00183	6.96638
104771	-0.636953	0.0350615	0.0738605	0.20031	0.631559	0.785927	-1.83827	0.00179019	0.034298	-2.67553	9.91367e-05	0.000898846	4.5911	4.95941	4.43918	3.80337	2.44531	2.15999	1.96827	2.23582
104772	0.040316	0.851775	0.886004	-0.0406423	0.890683	0.94862	-0.603317	0.0727717	0.225303	-0.522359	0.0488036	0.0781171	2.14944	2.11158	2.236	2.09748	1.51687	1.61685	1.30085	1.92548
104774	1.7941	0.00521456	0.0180235	0.862575	0.0889441	0.239239	0.494694	0.289907	0.482973	1.42622	0.0148992	0.0294382	-5.78719	-5.74017	-4.10385	-3.83326	-3.43733	-3.51243	-4.37158	-4.30334
104783	-0.827881	0.0126875	0.0347893	1.08274	0.0168663	0.107771	-0.143651	0.652759	0.782656	-2.05428	0.000261661	0.00162497	3.99253	3.6543	3.27985	2.67454	2.67119	3.02672	1.69451	1.84641
104793	-0.0413848	0.810199	0.854514	-1.21997	0.000489625	0.0192959	-0.165923	0.433508	0.619906	1.01267	0.000399647	0.00212482	3.66608	4.05587	3.82096	3.81779	3.70222	3.60651	4.89286	4.85401
104801	0.604616	0.111145	0.179347	0.862575	0.317026	0.520913	-5.01642	0.000163943	0.012385	-5.27438	9.89014e-05	0.000898392	0.525689	1.35702	1.50614	1.58155	-3.43733	-3.51243	-4.37158	-4.30334
104805	2.60537	0.000353073	0.00394852	0.106128	0.77005	0.877956	-0.0417896	0.909925	0.949237	2.45746	0.000439296	0.00226171	-0.577741	0.599685	2.52551	2.7059	2.62876	2.50993	2.5942	2.32602
104807	1.78219	0.111635	0.179967	0.862575	0.475398	0.666082	-1.08699	0.340041	0.533412	-0.167374	0.878606	0.901413	-2.61727	-5.74017	-2.51889	-2.2483	-3.43733	-3.51243	-4.37158	-4.30334
104809	0.110864	0.434316	0.522791	0.874599	0.00147088	0.0318717	0.123187	0.456781	0.638798	-0.640549	0.00348733	0.010293	3.4631	3.61077	3.63086	3.66659	3.85729	3.68724	2.99474	2.7947
104818	-0.549545	0.00317141	0.0153441	-0.274379	0.0725224	0.239239	-0.42886	0.0146204	0.0916539	-0.704025	0.000829943	0.00352785	5.6573	5.45889	5.03826	4.97731	4.56829	4.59085	4.78577	4.92308
104824	0.314206	0.26344	0.350979	0.418959	0.15147	0.331187	-0.0993509	0.710634	0.821434	-0.204103	0.45422	0.516438	5.56981	5.09352	5.96089	5.32913	5.62066	5.47341	5.2339	5.02085
104825	-0.456294	0.204487	0.287147	0.414605	0.311837	0.515168	-0.292234	0.45512	0.637521	-1.16313	0.0123532	0.0277993	5.08856	4.64246	4.77573	4.00594	4.28377	3.95517	3.38997	4.02309
104828	0.20927	0.615687	0.688352	0.862575	0.0889922	0.239239	0.494694	0.289991	0.482973	-0.15861	0.702942	0.747533	-4.20223	-4.1552	-4.10385	-3.83326	-3.43733	-3.51243	-4.37158	-4.30334
104832	-0.566802	0.120172	0.19026	0.108188	0.754118	0.868	0.208129	0.565483	0.721189	-0.466861	0.170198	0.224771	5.14354	4.50895	4.6577	3.81779	4.48153	4.45335	4.31492	4.40402
104836	1.7941	0.0231119	0.0541546	0.854928	0.184037	0.375626	0.990416	0.139423	0.333563	1.92959	0.0158396	0.0309047	-5.78719	-5.74017	-4.10385	-3.83326	-2.43733	-3.51243	-3.37158	-4.30334
104837	1.7941	0.00521456	0.0180235	0.862575	0.0889441	0.239239	0.494694	0.289907	0.482973	1.42622	0.0148992	0.0294382	-5.78719	-5.74017	-4.10385	-3.83326	-3.43733	-3.51243	-4.37158	-4.30334
104840	1.7941	0.00521456	0.0180235	0.862575	0.0889441	0.239239	0.494694	0.289907	0.482973	1.42622	0.0148992	0.0294382	-5.78719	-5.74017	-4.10385	-3.83326	-3.43733	-3.51243	-4.37158	-4.30334
104841	1.7941	0.0231119	0.0541546	0.854928	0.184037	0.375626	0.990416	0.139423	0.333563	1.92959	0.0158396	0.0309047	-5.78719	-5.74017	-4.10385	-3.83326	-2.43733	-3.51243	-3.37158	-4.30334
104849	0.317792	0.100171	0.165961	0.242914	0.203989	0.400759	0.382565	0.0737835	0.227038	0.457443	0.0260828	0.0463625	3.73048	4.13482	4.19536	4.3114	4.67641	4.59085	4.35293	4.42798
104858	-1.56501	0.00222286	0.0121428	0.502276	0.326602	0.530672	-1.52405	0.0100402	0.0765212	-3.59133	7.18348e-05	0.000764189	6.41094	6.13443	5.00206	4.39074	3.48153	2.89696	2.16758	3.21236
104863	1.01842	0.00047841	0.00466909	-0.0953008	0.546218	0.721678	0.995953	0.000543725	0.0209352	2.10967	6.37797e-06	0.000277389	5.41064	5.81969	6.64182	6.62515	7.63614	7.62263	7.77403	7.67466
104865	3.60713	1.11708e-05	0.000860122	0.155573	0.524343	0.706544	0.444154	0.119739	0.30317	3.89571	5.21903e-06	0.000266338	-2.61727	-2.93281	0.754132	0.921628	1.20653	1.34555	1.12027	1.12293
104867	-0.939437	0.0818032	0.141467	-0.714865	0.370681	0.573858	-1.45608	0.0878624	0.250652	-1.68065	0.0130252	0.0289133	2.64326	3.37618	1.45074	2.76665	0.650132	0.575029	1.46131	1.18852
104871	-0.658426	0.00296492	0.014646	-0.520058	0.0125344	0.0922675	-0.467715	0.0204823	0.110224	-0.606083	0.0041618	0.0117865	5.74954	5.6278	5.15589	4.89806	4.52267	4.60131	4.97936	5.18651
104873	1.7941	0.00521456	0.0180235	0.862575	0.0889441	0.239239	0.494694	0.289907	0.482973	1.42622	0.0148992	0.0294382	-5.78719	-5.74017	-4.10385	-3.83326	-3.43733	-3.51243	-4.37158	-4.30334
104877	-0.00899254	0.948174	0.961465	-0.339634	0.0623389	0.222045	-0.220881	0.201711	0.415536	0.10976	0.419332	0.482703	4.34338	4.09746	4.26684	4.14973	3.92899	4.04981	4.36651	4.29285
104882	-0.286739	0.648867	0.718649	0.862575	0.276203	0.478902	-0.318293	0.66298	0.789202	-1.46761	0.057558	0.0901355	-2.32776	-3.41824	-2.51889	-3.83326	-3.43733	-3.51243	-4.37158	-4.30334
104887	-0.412925	0.0324113	0.0697675	-0.444476	0.0416815	0.17661	-0.143115	0.457591	0.639291	-0.111565	0.458676	0.520711	9.4607	9.70051	9.35558	8.96217	8.96435	9.08166	9.41203	9.5253
104888	0.315555	0.134501	0.207658	0.204733	0.366142	0.568527	0.217217	0.356689	0.548639	0.328039	0.106129	0.150482	1.66402	1.41971	1.82689	1.89466	1.98893	2.15999	1.89521	1.84641
104890	0.271467	0.205345	0.288048	0.518775	0.0443721	0.184346	0.636735	0.0255588	0.12351	0.389427	0.0709515	0.107513	2.35746	2.09904	2.49606	2.50659	3.22088	3.05742	2.4486	2.7947
104895	0.278258	0.142576	0.216953	0.289089	0.171929	0.359017	0.0548993	0.780509	0.866667	0.044069	0.796667	0.831135	8.90591	9.14844	9.06717	9.56147	9.35891	9.36005	9.10403	9.0361
104898	2.17273	0.00780313	0.024272	1.77252	0.022144	0.124323	0.476891	0.413001	0.602123	0.877104	0.192313	0.249749	-2.61727	-0.882184	0.419713	0.414668	0.650132	1.13142	-0.912148	-0.843904
104904	-0.459554	0.0970398	0.161995	-0.0556139	0.823511	0.910047	0.0115371	0.963417	0.97947	-0.392403	0.140869	0.190896	5.71215	5.44781	5.41382	4.8142	5.25964	5.0072	5.04416	5.33148
104905	-0.618247	0.126125	0.197485	-0.322848	0.494513	0.681662	-0.252028	0.605025	0.747865	-0.547428	0.142389	0.192606	3.48193	2.64785	2.49606	2.39556	2.23509	2.15999	2.47391	2.56703
104909	-0.00283409	0.98224	0.986289	0.25333	0.124341	0.293423	-0.00894221	0.952466	0.973592	-0.265106	0.0686826	0.104566	3.84398	3.76167	3.70993	3.90145	3.83879	3.74495	3.57679	3.49756
104915	0.257932	0.0370534	0.0771311	-0.433239	0.00400959	0.0509133	-0.107352	0.30904	0.503481	0.583819	0.0008869	0.00369624	5.70115	5.80142	5.99813	6.02005	5.90029	5.90331	6.34866	6.32146
104917	0.229792	0.177812	0.257256	-0.209149	0.303499	0.507007	-0.315241	0.148138	0.345347	0.1237	0.427002	0.489738	3.00397	2.88554	3.29703	3.03711	2.75249	2.9633	3.14412	2.99129
104918	-0.19052	0.160726	0.237314	0.753927	0.000755645	0.0236066	0.181718	0.184512	0.394896	-0.762729	0.000646087	0.00292775	5.35683	5.18391	5.04336	5.11803	5.1663	5.35484	4.508	4.50724
104920	6.04306	2.19668e-05	0.00110631	0.155118	0.519808	0.70252	2.21184	0.000329948	0.0164781	8.09979	2.29527e-06	0.000242508	-5.78719	-4.1552	0.940545	1.21113	3.27691	3.28198	3.23575	3.00955
104932	-0.215351	0.132163	0.204965	-0.637737	0.00417705	0.0520974	-1.16787	0.000158579	0.0123369	-0.745488	0.000930124	0.00382299	8.20468	8.47895	8.07979	8.17412	6.98579	6.92947	7.6057	7.58503
104937	1.11878	0.000215801	0.00302571	-0.0197551	0.900425	0.954299	0.0342375	0.832011	0.90117	1.17277	0.000144179	0.00112922	3.50972	3.7007	4.60696	4.84974	4.80584	4.71157	4.88345	4.67108
104938	1.63026	0.00229194	0.0124066	0.760662	0.0487163	0.193891	0.762939	0.0549361	0.190528	1.63254	0.00187108	0.00637835	-0.172484	0.0927249	1.18155	2.04938	2.23509	2.46485	1.51106	1.67394
104940	-0.372989	0.117403	0.186819	0.0962704	0.741364	0.862268	-0.439034	0.159975	0.361915	-0.908294	0.00471524	0.012974	3.06767	2.77159	2.71633	2.35657	2.17738	2.04215	1.85724	2.1724
104943	0.725776	0.0784562	0.136908	-0.100245	0.836489	0.917341	-1.12216	0.0429841	0.164281	-0.296138	0.45895	0.520973	-0.246175	0.467337	0.594369	1.10031	-0.235697	-0.342509	-0.37158	-0.00321147
104945	-0.374045	0.0518066	0.0994115	-0.0285527	0.876206	0.940757	-0.471931	0.0349766	0.147052	-0.817424	0.00181015	0.00620862	5.11292	5.06638	4.70672	4.72516	4.33746	4.1529	4.06721	4.4813
104957	0.328968	0.376798	0.467123	0.0726662	0.858444	0.929468	0.227157	0.599469	0.743713	0.483459	0.182447	0.238755	1.77886	1.60111	1.56858	2.53026	1.82946	2.65066	2.15292	2.19651
104959	0.326267	0.120511	0.190721	0.478624	0.0376269	0.167187	0.772893	0.00480166	0.0538147	0.620536	0.0140231	0.0294382	5.68702	5.52721	5.68242	6.18216	6.66202	6.75084	6.28216	6.17341
104960	0.545407	0.0177612	0.044371	-0.816611	0.00215542	0.0390396	0.845152	0.0027395	0.0410025	2.20717	6.30319e-06	0.000277389	6.28594	6.7277	6.98428	7.1173	7.96195	7.8302	8.76317	8.66101
104961	2.60709	0.00322517	0.0153798	0.862575	0.186076	0.377203	-0.318293	0.588907	0.736736	1.42622	0.0481048	0.0772057	-5.78719	-5.74017	-2.51889	-3.83326	-3.43733	-3.51243	-4.37158	-4.30334
104962	-0.155806	0.332084	0.421901	0.506662	0.022277	0.124689	0.294848	0.131526	0.321767	-0.36762	0.0434598	0.0709431	3.97934	3.74163	3.61725	3.80337	3.96355	4.03446	3.40321	3.58541
104967	0.20927	0.615687	0.688352	0.862575	0.0889922	0.239239	0.494694	0.289991	0.482973	-0.15861	0.702942	0.747533	-4.20223	-4.1552	-4.10385	-3.83326	-3.43733	-3.51243	-4.37158	-4.30334
104978	7.41391	0.000184976	0.00278587	2.71514	0.0516891	0.200179	-3.35236	0.00467291	0.0531705	1.3464	0.31834	0.383236	-3.46527	-4.74017	3.99944	2.54178	-0.267406	0.188006	-2.78662	-2.71837
104985	0.551359	0.107633	0.175243	-0.0461864	0.898036	0.952909	-0.4157	0.273133	0.482973	0.181846	0.557869	0.615921	-0.465266	-0.785969	-0.0163865	-0.132819	-0.267406	-0.705079	-0.284117	-0.602895
104987	1.7941	0.00521456	0.0180235	0.862575	0.0889441	0.239239	0.494694	0.289907	0.482973	1.42622	0.0148992	0.0294382	-5.78719	-5.74017	-4.10385	-3.83326	-3.43733	-3.51243	-4.37158	-4.30334
104995	1.7941	0.00521456	0.0180235	0.862575	0.0889441	0.239239	0.494694	0.289907	0.482973	1.42622	0.0148992	0.0294382	-5.78719	-5.74017	-4.10385	-3.83326	-3.43733	-3.51243	-4.37158	-4.30334
105000	-0.0848567	0.586082	0.662952	0.111766	0.507383	0.692999	0.276975	0.146281	0.342691	0.0803521	0.583495	0.640659	4.00234	3.97922	4.09091	3.69812	4.19929	4.16705	4.01644	4.12712
105019	-1.22082	0.0136978	0.0368714	-0.892314	0.14642	0.324604	-1.40779	0.0373482	0.15161	-1.7363	0.00292992	0.00902491	2.21843	2.06073	1.51086	0.254204	-0.267406	-0.705079	0.582617	0.220227
105024	1.2419	0.000181771	0.00275982	0.661369	0.0100436	0.0814957	-0.00624936	0.972658	0.983911	0.574285	0.0116172	0.0264678	2.34723	2.13635	3.58964	3.36641	3.45749	3.49879	2.92304	2.70789
105025	0.324212	0.181122	0.261064	0.467785	0.0945362	0.248927	0.374959	0.173848	0.381092	0.231386	0.305531	0.370311	3.4631	3.03791	3.70993	3.42413	3.9973	3.90542	3.65633	3.304
105027	2.6654	0.00353643	0.0163165	0.273562	0.534142	0.713073	1.29535	0.0363353	0.149396	3.68719	0.000371237	0.0020255	-0.929213	-2.28073	0.540007	1.65859	2.11726	2.59609	2.13622	2.03651
105035	0.20927	0.743358	0.799976	0.0762886	0.908497	0.956932	0.494694	0.481106	0.652402	0.627676	0.324574	0.389554	-4.20223	-4.1552	-4.10385	-3.83326	-3.43733	-3.51243	-4.37158	-2.71837
105036	1.44362	0.110274	0.178302	-0.620227	0.478348	0.668289	-0.492746	0.579495	0.730345	1.5711	0.0803925	0.11929	-2.32776	-1.49224	-1.29649	0.414668	0.0221008	-1.92747	-0.464689	-0.215872
105044	3.15049	0.0638643	0.116987	1.47999	0.310241	0.513383	0.553879	0.682609	0.803751	2.22439	0.172268	0.227128	-5.78719	-5.74017	-4.10385	-1.0259	-3.43733	-0.705079	-2.78662	-4.30334
105045	2.11161	0.000117576	0.00224943	0.851224	0.0101469	0.0818887	0.567227	0.0507735	0.181753	1.82761	0.00025763	0.00161083	1.45121	1.49824	3.33078	3.8741	4.21372	4.0949	3.51716	3.08037
105047	-0.736352	0.00411771	0.0180235	-0.630624	0.00918337	0.0776844	0.158653	0.396713	0.586761	0.0529253	0.751529	0.791795	5.37183	5.49445	4.89333	4.48415	4.95927	4.75435	5.54481	5.42741
105048	0.152108	0.862571	0.894477	0.966811	0.37927	0.581469	-0.27585	0.785615	0.8697	-1.09055	0.270052	0.332921	-1.72888	-1.51829	-1.60305	-1.33246	-1.56549	-1.92747	-4.37158	-1.03131
105056	5.21077	8.7533e-05	0.00194708	0.56689	0.250487	0.449124	0.765703	0.133977	0.325626	5.40959	7.22212e-05	0.000766251	0.190086	1.98093	5.84013	6.72612	6.90807	7.19751	6.63194	6.33962
105058	1.74795	0.000339502	0.00386934	0.25049	0.307482	0.51067	0.947551	0.0069024	0.0636673	2.44501	3.68587e-05	0.000534564	2.36762	3.00467	4.25809	4.62207	5.30076	5.45623	5.22275	5.03429
105060	-0.726081	0.0207674	0.0498752	0.657464	0.106483	0.267744	-0.444874	0.217581	0.435933	-1.82842	0.000430971	0.0022317	2.16117	2.39765	1.77879	1.29602	1.20653	1.01113	0.672815	0.220227
105063	-0.0189221	0.934555	0.951211	-0.1439	0.572958	0.742301	-0.234169	0.376743	0.567466	-0.10919	0.631902	0.684055	4.88788	4.37488	4.76343	4.44751	4.51104	4.24912	4.64801	4.39363
105066	0.461178	0.148893	0.224762	-1.17117	0.00545849	0.0593915	0.59747	0.0751814	0.229212	2.22982	0.000183844	0.00130964	4.65056	4.69133	5.56681	4.67849	5.61524	5.84292	6.97105	6.83045
105068	1.92525	2.12331e-05	0.00108852	-0.547448	0.0186158	0.113309	-0.249607	0.208674	0.424895	2.2231	7.37127e-06	0.000290375	2.5571	2.77947	4.41579	4.78513	4.28377	4.40046	4.9571	4.82337
105079	-0.375035	0.11458	0.183574	-0.0281454	0.896992	0.952594	-0.29529	0.205993	0.421593	-0.64218	0.0191723	0.0360436	6.09965	5.79948	5.49792	5.65257	5.52557	5.03831	5.16564	5.44988
105084	-1.40988	0.000259068	0.00333638	-1.60271	0.00041382	0.0182738	-1.30112	0.00135284	0.0307442	-1.10829	0.000882558	0.003682	6.28594	6.57187	5.13216	4.89806	4.01388	3.43008	5.2339	5.40575
105085	0.835912	0.00319397	0.0153798	0.524456	0.0267129	0.138809	0.641047	0.0142706	0.0904048	0.952503	0.0012577	0.00478001	3.33951	2.92161	3.96761	3.96764	4.72758	4.49319	4.05049	4.11873
105088	1.833	0.130765	0.20331	0.0644103	0.95676	0.975725	-0.698829	0.554919	0.712206	1.06976	0.356844	0.420298	-5.78719	-3.41824	-1.78192	-3.83326	-3.43733	-3.51243	-2.78662	-4.30334
105093	-0.566209	0.00426388	0.0180235	-0.718876	0.00225795	0.0401652	-0.430973	0.0264792	0.125718	-0.278307	0.0631251	0.0974219	4.98512	5.05669	4.52186	4.38106	3.87555	4.16705	4.79081	4.69384
105095	-0.26627	0.146232	0.2215	0.206646	0.247065	0.446127	-0.00191846	0.990885	0.994871	-0.474835	0.0245794	0.044197	6.47578	6.0684	6.07108	5.94317	6.03231	5.97741	5.71323	5.88278
105096	0.000983017	0.996348	0.997435	-0.245703	0.349261	0.552816	-0.000466683	0.99861	0.999363	0.246219	0.236395	0.297634	2.24071	2.3313	2.49606	2.04938	2.05452	2.50993	2.47391	2.59148
105098	0.239154	0.496106	0.580883	0.238224	0.520242	0.703001	-0.0114651	0.975044	0.985613	-0.0105346	0.975395	0.980901	5.10231	4.03627	4.89897	4.70977	4.81533	4.77758	4.61426	4.5008
105105	0.219669	0.292055	0.381105	0.913048	0.00294763	0.0453161	0.990839	0.00248091	0.0394828	0.297461	0.149768	0.201241	3.41982	3.7254	3.67094	3.92829	4.60159	4.95924	3.92763	3.81041
105114	2.11683	0.00584711	0.0195878	-0.420525	0.44813	0.644064	-0.37951	0.501375	0.669304	2.15785	0.00473392	0.0130104	-2.08675	-2.57024	-0.644418	0.254204	0.0221008	-1.19051	-0.123652	-0.215872
105117	0.232778	0.194257	0.275374	0.0411473	0.817425	0.905838	0.30018	0.145641	0.341876	0.491811	0.015837	0.0309047	3.73833	3.49585	3.7227	3.99329	4.27003	4.03446	4.06721	4.15199
105118	-0.582731	0.0449871	0.0891969	-0.129522	0.604052	0.766119	0.081099	0.748722	0.846886	-0.372111	0.151059	0.202793	5.65004	5.26335	5.16528	4.56335	4.95927	4.95109	4.97936	5.19052
105120	0.821479	0.00817059	0.0251286	0.660962	0.0206214	0.120596	0.463406	0.0715611	0.223133	0.623922	0.0262433	0.0465964	5.81708	5.51486	6.77803	6.20154	6.89022	7.01211	6.35719	6.22316
105122	0.397113	0.0513854	0.0987819	0.639127	0.0147155	0.100275	0.0569106	0.770063	0.859781	-0.185103	0.314811	0.379631	3.74614	3.74968	3.92406	4.39074	4.29738	4.10962	3.57679	3.54841
105123	2.81827	0.00278035	0.0140739	0.575962	0.264298	0.465564	1.5391	0.0238129	0.118948	3.78141	0.000399986	0.00212566	-4.20223	-3.30721	-0.40341	-1.51133	0.810597	0.394457	-0.284117	0.340521
105126	-0.403571	0.0565418	0.106314	-0.244526	0.230587	0.428981	0.0201991	0.919442	0.95455	-0.138846	0.427142	0.489803	4.82291	4.56019	4.45457	4.10338	4.43919	4.18105	4.59709	4.50724
105137	0.715462	0.00225231	0.0122756	0.354291	0.0562225	0.20971	0.295133	0.103696	0.277437	0.656303	0.00301177	0.00922465	3.62007	3.5313	4.15825	4.4382	4.71749	4.45911	4.22461	4.2397
105139	1.64791	0.00119751	0.00809826	-2.23341	0.000472634	0.0190393	-0.778132	0.060968	0.202989	3.10319	2.80526e-05	0.000478209	2.59218	3.33932	4.35968	4.88442	3.96355	3.70673	6.16855	5.96462
105145	0.314262	0.210663	0.294056	0.233543	0.373438	0.576482	0.330706	0.239304	0.462864	0.411425	0.100468	0.143719	3.27728	3.63705	3.5182	4.05548	4.15513	4.04981	4.0078	3.72457
105146	-0.108299	0.48965	0.575037	-0.255994	0.224364	0.422265	-0.664077	0.0120431	0.0835677	-0.516381	0.0126613	0.0284016	4.04411	3.89465	3.70993	4.03093	3.19203	3.20181	3.54131	3.362
105149	-1.2325	0.000181557	0.00275982	-2.08294	2.23382e-05	0.00502262	-0.598143	0.0226246	0.115751	0.252293	0.105459	0.14971	4.96184	4.79414	3.5182	3.78879	3.00561	3.08748	5.23019	5.02982
105153	-1.40814	0.0716955	0.127459	0.00784926	0.992644	0.9964	0.0792122	0.929067	0.959535	-1.33678	0.0660083	0.10101	2.68448	3.79705	1.87343	1.78145	1.77212	2.04215	1.12027	2.70789
105154	-0.0314932	0.94851	0.961724	0.644504	0.4704	0.661422	-1.71269	0.0519766	0.184202	-2.38868	0.00953202	0.0226642	4.06377	3.38178	4.35493	2.94363	2.11726	1.84512	0.837874	1.84641
105158	-0.759127	0.176469	0.255778	-1.05582	0.259509	0.460321	-1.88258	0.0619959	0.205095	-1.58588	0.0244517	0.0440203	3.86923	2.90153	3.01509	2.18911	1.31756	0.188006	1.40978	2.20446
105160	0.2229	0.373995	0.464179	-0.0396102	0.868165	0.935503	0.773773	0.0223158	0.115408	1.03628	0.0020809	0.00692242	3.21562	3.2414	3.13932	3.80337	4.24215	4.20867	4.44796	4.07778
105167	-0.408639	0.0727239	0.128827	0.13284	0.608915	0.769916	-0.449552	0.11088	0.28903	-0.991031	0.00211811	0.00700909	4.13018	3.73759	3.44305	3.61795	3.19203	2.9633	3.04627	2.83622
105168	0.119107	0.673696	0.740446	0.0575542	0.876956	0.94097	-0.461887	0.236202	0.459096	-0.400334	0.19548	0.253174	3.03617	2.54061	3.0357	2.76665	2.05452	2.82742	2.3966	2.38317
105174	-0.662249	0.0505796	0.097484	-0.255766	0.393692	0.594147	0.137254	0.650354	0.780713	-0.269229	0.345165	0.409248	5.5103	5.15995	5.06357	4.24889	4.83413	4.78677	4.96604	5.16631
105181	0.138224	0.412619	0.502092	0.417359	0.0490035	0.194839	0.552085	0.0212657	0.112194	0.27295	0.110477	0.155815	3.01694	2.75569	3.01509	3.03711	3.50518	3.64744	3.22088	3.09754
105182	1.32337	3.24841e-05	0.0013057	0.422325	0.0144607	0.0994657	0.321128	0.0435384	0.165501	1.22218	4.8268e-05	0.000621142	3.68651	3.57951	4.98626	4.92496	5.37965	5.17756	4.93903	4.77081
105183	0.887656	0.00536128	0.0183622	-0.392239	0.116401	0.282255	0.309835	0.223661	0.443606	1.58973	0.000164522	0.0012271	3.04253	3.55675	4.13932	4.2382	4.32422	4.66249	4.9526	4.82337
105184	1.7941	0.00521456	0.0180235	0.862575	0.0889441	0.239239	0.494694	0.289907	0.482973	1.42622	0.0148992	0.0294382	-5.78719	-5.74017	-4.10385	-3.83326	-3.43733	-3.51243	-4.37158	-4.30334
105185	-0.400291	0.729491	0.788268	-1.33837	0.350049	0.553621	-1.13741	0.435116	0.621089	-0.199327	0.856534	0.881877	-2.97984	-0.882184	-0.933924	-3.83326	-3.43733	-3.51243	-1.56422	-2.71837
105192	2.4635	0.0059373	0.0197899	-0.124155	0.81521	0.904731	0.940761	0.142059	0.336899	3.52841	0.000629988	0.00288105	-3.46527	-3.41824	-0.933924	-1.0259	-0.267406	0.188006	0.757703	-0.602895
105201	1.00259	0.0231954	0.0543125	-0.216021	0.570153	0.739872	-0.0396958	0.919726	0.954679	1.17891	0.00896946	0.0216238	-0.577741	-0.454763	0.419713	0.559058	0.954987	-0.0530023	0.672815	0.650861
105207	1.7941	0.00521456	0.0180235	0.862575	0.0889441	0.239239	0.494694	0.289907	0.482973	1.42622	0.0148992	0.0294382	-5.78719	-5.74017	-4.10385	-3.83326	-3.43733	-3.51243	-4.37158	-4.30334
105209	1.05462	5.19561e-05	0.00157397	0.0797807	0.491194	0.679261	0.85055	0.000176685	0.0128859	1.82539	2.02614e-06	0.000232538	4.75196	4.8773	5.86626	5.87237	6.67511	6.76485	6.70323	6.57701
105210	-0.380586	0.242479	0.329639	0.0451221	0.906699	0.956884	-0.246093	0.533299	0.696364	-0.671801	0.0586531	0.091622	3.86565	3.38654	3.64434	2.7961	2.97206	3.02672	2.86683	3.04539
105214	-0.207339	0.475887	0.562117	-2.02241	0.00118305	0.0289957	-1.0483	0.0328569	0.141661	0.766767	0.0166035	0.0320678	3.98264	3.34995	3.36376	3.56762	2.67119	2.15999	4.55026	4.31505
105215	1.7941	0.00521456	0.0180235	0.862575	0.0889441	0.239239	0.494694	0.289907	0.482973	1.42622	0.0148992	0.0294382	-5.78719	-5.74017	-4.10385	-3.83326	-3.43733	-3.51243	-4.37158	-4.30334
105221	-0.926579	0.00117615	0.00800904	-0.679522	0.00725826	0.0688122	-0.364915	0.0776515	0.232994	-0.611971	0.00903731	0.0217391	6.2376	6.48353	5.54541	5.31903	5.15138	4.98741	5.59276	5.90246
105223	2.68067	0.0140599	0.0376256	-1.50797	0.106632	0.268061	-1.18014	0.201437	0.415536	3.0085	0.00717983	0.0180913	-5.78719	-4.1552	-2.33831	-2.2483	-3.43733	-3.51243	-2.78662	-1.13341
105224	0.0334499	0.897129	0.922479	0.5382	0.091265	0.243102	0.599625	0.0702555	0.220213	0.0948752	0.709033	0.753004	8.09885	7.39153	7.84488	7.71508	8.37845	8.38276	7.77975	7.90612
105228	0.664507	0.070498	0.12561	0.317823	0.361821	0.563798	0.467803	0.217487	0.435924	0.814488	0.0277561	0.0488863	2.44162	1.83726	2.79097	2.82495	3.40816	3.14578	3.26505	2.63918
105230	-0.0795886	0.888246	0.914916	1.0022	0.161109	0.344184	0.662852	0.333706	0.527006	-0.418934	0.466797	0.528222	1.08317	0.735568	0.850347	0.810597	1.20653	1.77297	-0.464689	1.47802
105231	0.164481	0.219652	0.304502	0.157599	0.23343	0.431853	0.355511	0.0240934	0.119396	0.362393	0.0225788	0.0411891	5.17642	5.25631	5.2559	5.50882	5.73009	5.74259	5.6014	5.5562
105240	0.503089	0.236223	0.322864	-0.727304	0.0866681	0.239239	0.721666	0.138573	0.332731	1.95206	0.000649484	0.00293979	1.03299	1.99454	1.77879	2.27527	2.79149	2.67739	3.52929	3.39015
105242	-0.152081	0.289541	0.37857	0.101932	0.547718	0.721984	-0.161866	0.354831	0.54698	-0.415878	0.0172659	0.0330849	3.68651	3.54755	3.5182	3.40515	3.40816	3.20181	3.17531	3.22805
105243	-1.32478	0.0316844	0.0685491	-0.503278	0.399107	0.599118	-0.371621	0.544333	0.705064	-1.19312	0.0369661	0.0618138	5.46724	4.94896	4.61383	3.06156	3.72254	3.30775	3.77308	4.26272
105255	1.7941	0.00521456	0.0180235	0.862575	0.0889441	0.239239	0.494694	0.289907	0.482973	1.42622	0.0148992	0.0294382	-5.78719	-5.74017	-4.10385	-3.83326	-3.43733	-3.51243	-4.37158	-4.30334
105258	0.317479	0.118659	0.188565	-0.0309774	0.86524	0.933892	0.542951	0.0250114	0.121847	0.891408	0.00155621	0.00557136	3.96936	4.20966	4.2493	4.58037	4.91582	4.98342	5.12759	4.83366
105261	0.17594	0.511082	0.595091	0.112285	0.720223	0.846635	-0.0524326	0.869203	0.923436	0.0112221	0.964913	0.972901	3.47255	2.9568	3.56149	3.20016	3.48153	3.20181	3.40321	3.04539
105262	4.15232	7.74248e-05	0.00184092	0.353889	0.439381	0.636153	-0.66239	0.149888	0.347906	3.13604	0.000502085	0.00247129	-2.32776	-2.93281	1.45074	1.60636	0.46956	1.24245	0.913823	0.0889822
105267	2.67209	7.05305e-05	0.00177606	-0.0944893	0.714905	0.842753	0.570369	0.0733652	0.22651	3.33695	1.3507e-05	0.000359064	5.91108	6.64111	8.66826	9.24839	9.51468	9.51909	9.69627	9.5249
105271	-0.630038	0.0277777	0.0621723	-0.231408	0.346884	0.551387	0.666342	0.0405281	0.15936	0.267712	0.192944	0.250324	3.59867	3.13942	2.66433	2.82495	3.35709	3.45335	3.69988	3.57318
105272	-1.012	0.0462744	0.0911588	-0.251532	0.568771	0.738648	0.0208688	0.962365	0.978682	-0.739601	0.112403	0.157971	6.35715	5.69603	5.59832	4.40036	5.05852	5.01504	5.15002	5.42629
105275	1.7941	0.0282742	0.062752	-1.32823	0.0565026	0.210191	0.494694	0.460628	0.640386	3.61703	0.000631269	0.0028858	-5.78719	-5.74017	-4.10385	-3.83326	-3.43733	-3.51243	-2.78662	-1.49598
105276	0.810517	0.0793333	0.13807	0.635072	0.153479	0.333866	0.824429	0.0862776	0.247967	0.999874	0.0350537	0.0591379	-1.03231	-1.6527	-0.40341	-0.663334	0.650132	-0.0530023	-0.284117	-0.396445
105278	-0.531498	0.0146511	0.0386606	-0.516672	0.0497424	0.19617	-0.557942	0.041969	0.162327	-0.572767	0.00831691	0.0203418	3.02338	2.90008	2.49606	2.35657	2.05452	1.69702	2.42284	2.35488
105280	-0.349887	0.374238	0.464432	0.375328	0.367639	0.57005	0.740608	0.114475	0.294667	0.0153927	0.965937	0.973694	-1.8803	-1.75831	-1.90222	-2.45475	-1.6718	-1.19051	-1.73931	-1.87038
105288	-0.496084	0.0136713	0.0368186	0.134716	0.411841	0.61091	-0.235013	0.174343	0.381784	-0.865813	0.000912247	0.00376767	7.18273	6.86508	6.63171	6.42766	6.35546	6.2324	6.14904	6.16936
105295	-0.392291	0.273919	0.36167	1.29621	0.0274283	0.140665	-0.575658	0.187095	0.397785	-2.26416	0.001189	0.00460031	5.27147	4.30286	4.5364	4.2382	3.87555	3.76369	2.34267	2.70789
105299	1.7941	0.0070974	0.0226752	1.10312	0.0492693	0.195311	0.735242	0.153299	0.35249	1.42622	0.0195414	0.0365532	-5.78719	-5.74017	-4.10385	-3.83326	-2.9519	-3.51243	-4.37158	-4.30334
105303	-0.660947	0.0146262	0.0386349	0.259858	0.36678	0.569073	-0.715651	0.0290003	0.131765	-1.63646	0.000235821	0.00153059	4.69964	4.33264	3.64434	4.09155	3.13252	3.14578	2.9413	2.81561
105313	1.00584	0.258756	0.345819	1.09662	0.152059	0.331976	2.68493	0.0114606	0.0821094	2.59414	0.0116173	0.0264678	-5.78719	-4.1552	-4.10385	-3.83326	-0.629976	-1.92747	-2.04965	-2.71837
105315	-0.638088	0.0535833	0.101989	-1.49867	0.00994668	0.0811332	-1.69468	0.00592306	0.0594597	-0.834107	0.0182883	0.0346601	3.98924	4.47779	3.56149	3.63435	1.31756	2.46485	3.49261	3.304
105316	1.35197	0.00123418	0.00821593	-0.21082	0.434668	0.632014	-0.0154273	0.954811	0.974653	1.54736	0.000474717	0.00237645	2.74028	3.3605	4.52915	4.2595	4.22801	4.53741	4.508	4.68535
105317	-0.225357	0.681127	0.746482	-2.33476	0.0206391	0.120641	-2.51019	0.0158282	0.0955135	-0.400793	0.464747	0.526351	-0.360929	0.488654	-0.196959	-0.132819	-3.43733	-1.92747	0.151982	-0.843904
105321	-1.66233	0.0008628	0.00661	-1.01742	0.0222927	0.124689	-0.736002	0.0787552	0.235064	-1.38091	0.00160074	0.00569944	5.37708	5.88417	4.16761	3.74417	3.10183	3.35793	3.98448	4.52003
105327	-0.588229	0.0064647	0.0211	0.164752	0.326913	0.531105	0.27049	0.142868	0.338079	-0.482491	0.0125908	0.0282541	4.78456	4.50895	4.16294	3.94153	4.34403	4.31411	4.14017	4.18852
105336	0.555531	0.0154824	0.0403232	0.00131282	0.993974	0.996984	0.329166	0.0960797	0.265386	0.883384	0.00169838	0.00594631	4.66916	4.84009	5.1129	5.51325	5.52557	5.75201	5.63264	5.64357
105339	4.14492	0.000147999	0.00251641	-2.14347	0.00192727	0.0369838	-0.458063	0.308883	0.503448	5.83032	2.06416e-05	0.000424058	0.441625	1.69446	4.70028	5.73089	4.72758	4.76834	6.90745	6.87595
105347	0.968002	0.027306	0.0614024	-0.514719	0.107506	0.269224	1.33858	0.00685995	0.0635717	2.82131	4.11914e-05	0.000571035	-1.39488	-0.882184	-0.40341	0.0736314	1.08623	1.24245	1.77817	1.57931
105350	1.09844	0.00270535	0.0138529	-0.415903	0.0926869	0.245738	0.643582	0.0358243	0.148241	2.15792	2.63904e-05	0.000468047	0.899307	1.15465	1.91852	2.35657	2.90252	2.63731	3.25047	3.11452
105355	1.4743	0.000101257	0.00210918	-0.714606	0.00568331	0.060622	-0.169667	0.359113	0.550947	2.01924	1.65874e-05	0.000390474	3.95259	4.08797	5.30766	5.68441	5.30076	5.34865	6.18205	5.89756
105357	0.854055	0.0837741	0.144165	-0.981827	0.0517498	0.200179	0.131035	0.780237	0.866559	1.96692	0.00163856	0.00579056	-1.61247	-1.41824	-1.122	-0.171054	-0.267406	-0.789968	0.283772	0.622664
105361	0.373456	0.430101	0.518501	-1.54618	0.0230478	0.127184	-1.00528	0.109079	0.286221	0.914352	0.0683416	0.10414	-1.46527	-0.882184	-0.933924	-0.663334	-2.43733	-1.19051	-0.464689	-0.0554077
105363	0.300061	0.0523788	0.100259	-0.150696	0.277477	0.480343	0.470027	0.0123849	0.0842934	0.920785	0.000180622	0.00130188	3.91844	3.88737	4.29276	4.10338	4.62337	4.72119	4.73956	4.90855
105365	1.7941	0.00521456	0.0180235	0.862575	0.0889441	0.239239	0.494694	0.289907	0.482973	1.42622	0.0148992	0.0294382	-5.78719	-5.74017	-4.10385	-3.83326	-3.43733	-3.51243	-4.37158	-4.30334
105366	1.7941	0.00521456	0.0180235	0.862575	0.0889441	0.239239	0.494694	0.289907	0.482973	1.42622	0.0148992	0.0294382	-5.78719	-5.74017	-4.10385	-3.83326	-3.43733	-3.51243	-4.37158	-4.30334
105367	-1.16464	0.000749056	0.00603337	-0.697597	0.0137916	0.0969471	-0.027969	0.894614	0.939729	-0.495016	0.0397978	0.0658297	7.13036	7.5329	5.95279	6.37498	6.14199	6.13322	6.85543	6.81496
105370	-0.384431	0.109942	0.177983	0.610714	0.0411985	0.175248	-0.42963	0.105305	0.280251	-1.42477	0.000552523	0.00263618	5.46488	5.06154	5.02286	4.72516	4.60159	4.30135	3.66734	4.01408
105372	1.62063	0.00763032	0.0239051	-0.243979	0.566927	0.737691	0.345088	0.451761	0.634752	2.2097	0.0011739	0.00455165	1.90629	3.10219	3.80904	4.46595	4.32422	4.60131	4.78071	4.63624
105379	1.85145	0.00277954	0.0140739	1.04976	0.0113116	0.0868263	1.8336	0.00152212	0.0323274	2.63529	0.000237989	0.00153881	-1.69973	-1.49224	0.419713	0.0736314	1.84807	2.32046	0.774098	1.31137
105388	-0.867227	0.173903	0.252827	-2.11452	0.049794	0.196217	-2.58351	0.0235125	0.118141	-1.33621	0.0570425	0.0894926	0.552656	1.0013	-0.933924	0.810597	-3.43733	-1.92747	-0.284117	-0.843904
105389	1.11498	0.0683653	0.122911	1.95107	0.0190604	0.114727	-0.307537	0.59787	0.742655	-1.14363	0.0931432	0.134693	-2.46527	-2.93281	-2.10385	-1.0259	-1.85237	-1.92747	-4.37158	-3.30334
105398	-0.377256	0.0162094	0.0416316	0.0116018	0.924091	0.962121	0.0265739	0.828875	0.898669	-0.362284	0.0185197	0.034993	5.62485	5.54003	5.2559	5.15258	5.28718	5.17756	5.30261	5.13753
105408	1.19896	0.00435234	0.0180235	-0.747331	0.0348693	0.160819	0.0478188	0.881199	0.931373	1.99411	0.000141368	0.00111672	1.26809	1.41971	2.81501	2.23283	2.34403	2.82742	3.50494	3.16427
105410	-0.287636	0.0719099	0.127761	0.118317	0.524197	0.706504	-0.416854	0.0506115	0.181356	-0.822807	0.000803723	0.00345594	3.50513	3.51958	3.22707	3.22202	2.90252	2.71638	2.80833	2.56703
105412	-0.108672	0.590558	0.666796	-0.248065	0.263731	0.465182	-0.269845	0.23279	0.455206	-0.130452	0.515658	0.576355	5.34144	4.91715	4.84744	5.20291	4.67641	4.82296	5.06929	4.92789
105415	1.72908	7.6716e-06	0.000736187	0.913484	0.000315129	0.0162507	0.523189	0.00571776	0.0587831	1.33879	3.50463e-05	0.000523545	5.61208	5.39362	7.27931	7.18452	7.68096	7.82931	6.89462	6.78876
105416	-0.703243	0.0833577	0.143593	-0.00738105	0.98509	0.991905	0.0386371	0.924998	0.957089	-0.657225	0.0873039	0.127797	4.95005	4.21258	4.23154	3.47962	3.76234	4.06499	3.78324	4.06735
105419	-0.456666	0.0929101	0.156436	0.045872	0.851321	0.926371	-0.171102	0.493808	0.6633	-0.673641	0.0252373	0.0451285	6.21386	5.53887	5.57034	5.2674	5.27348	5.22566	5.19257	5.21433
105438	0.880415	0.000432448	0.00439293	0.498358	0.0086408	0.0753371	0.577109	0.00524756	0.0557538	0.959165	0.000207624	0.0014145	3.3498	3.13328	4.20449	4.03093	4.6971	4.70189	4.20962	4.19252
105439	0.87367	0.0462226	0.0911019	-0.0420893	0.905561	0.956275	0.65928	0.131097	0.321164	1.57504	0.00208398	0.00692468	-0.20103	0.00399597	0.322415	1.28111	1.20998	1.64945	1.50223	1.44781
105449	-0.949189	0.0305346	0.0666974	0.38511	0.386805	0.588215	-0.834523	0.0758883	0.230484	-2.16882	0.000925745	0.00380892	6.25549	5.58007	5.394	4.51989	4.33746	3.93878	3.73171	3.76813
105451	0.676413	0.141709	0.215938	-0.251954	0.54713	0.721744	0.59632	0.21449	0.43202	1.52469	0.00540059	0.01445	-1.05384	-1.38967	-0.999513	-0.0571552	-0.20467	0.305189	0.225356	0.385964
105456	5.31167	0.00431616	0.0180235	-0.695329	0.532147	0.711511	-1.91356	0.101678	0.274705	4.09343	0.0165557	0.031991	-3.28639	1.23413	3.66896	4.91929	2.75526	1.9568	3.12156	2.96532
105462	-0.446419	0.308556	0.39824	1.47878	0.0378853	0.167854	-0.457589	0.403737	0.592966	-2.38279	0.00201207	0.00674042	0.235174	0.237115	-0.644418	0.254204	-0.629976	-0.705079	-2.78662	-1.49598
105472	1.2619	0.283304	0.371922	1.29904	0.303045	0.506675	0.344518	0.768023	0.858586	0.307384	0.791557	0.826598	-1.14334	-3.41824	0.144078	-2.2483	-0.629976	-0.705079	-2.78662	-1.13341
105473	-0.256176	0.180713	0.260589	0.276722	0.15566	0.336892	0.0674752	0.706036	0.818338	-0.465423	0.0330261	0.0564513	6.42561	6.11041	6.2079	5.81959	6.0485	6.11145	5.78703	5.81949
105478	-0.0599086	0.785951	0.834739	-0.475523	0.0717334	0.239239	-0.175572	0.451383	0.634444	0.240042	0.299098	0.363547	6.60028	6.84127	6.34633	6.97006	6.40345	6.56572	6.91902	7.00102
105495	-0.2804	0.110649	0.178691	0.0215325	0.896533	0.952302	-0.0135737	0.935838	0.963693	-0.315506	0.0748992	0.11245	5.02739	4.84386	4.52186	4.79974	4.57948	4.70189	4.51412	4.72733
105502	1.67412	7.09936e-05	0.00177769	0.781209	0.00438634	0.0533326	0.425581	0.0532612	0.186923	1.31849	0.000276382	0.00168225	3.63277	4.11626	5.64602	5.44983	5.99521	5.95313	5.2523	5.13338
105503	-0.191802	0.215045	0.299263	0.280058	0.118722	0.286161	0.378562	0.0569858	0.194727	-0.093298	0.499253	0.56017	3.55488	3.35523	3.26247	3.26477	3.72254	3.56438	3.38997	3.33329
105505	2.40931	5.01836e-05	0.0015712	0.253428	0.237963	0.435366	0.96129	0.00388825	0.0479591	3.11717	6.99918e-06	0.000285561	1.08317	1.49824	3.45839	3.96764	4.68679	4.63222	4.50186	4.30769
105506	-0.221844	0.481094	0.5672	0.270689	0.443918	0.640624	0.521795	0.188159	0.398556	0.0292625	0.917083	0.933906	1.961	2.18465	1.51086	2.23283	2.71242	2.04215	2.19828	2.00045
105510	0.797042	0.0027636	0.0140308	0.171822	0.340783	0.545034	1.02734	0.000729459	0.023992	1.65256	5.22564e-05	0.000643087	5.5412	5.34265	6.04717	6.42766	7.27606	7.25658	7.20254	6.98611
105516	3.10387	0.000934389	0.00699488	0.308214	0.552573	0.726057	0.0365387	0.94334	0.967662	2.83219	0.00147501	0.00535616	-3.46527	-4.1552	-0.40341	-1.0259	-0.629976	-0.705079	-0.464689	-1.49598
105520	-0.64231	0.00584	0.0195792	-0.352047	0.1291	0.300494	-0.895399	0.00381644	0.0475501	-1.18566	0.000264324	0.00163637	4.9089	4.66604	4.29276	3.98052	3.35709	3.14578	3.6057	3.59753
105526	2.91708	7.14405e-08	0.000261566	1.49775	4.33122e-06	0.00246179	-0.346354	0.0136587	0.0887028	1.07297	3.27665e-05	0.000509214	3.72258	3.74566	6.67341	6.62924	6.34567	6.264	4.86443	4.74923
105534	-0.284673	0.292096	0.381117	0.422058	0.166922	0.351929	0.0902167	0.749585	0.847338	-0.616515	0.0452489	0.073382	4.99417	4.36443	4.50718	4.27003	4.27003	4.69214	4.09194	4.03206
105537	-1.01974	0.000480511	0.00468086	-0.0917226	0.597111	0.76055	-0.711449	0.00477554	0.0536228	-1.63947	3.11798e-05	0.000501366	7.36366	7.09174	6.21921	6.19879	5.59884	5.39746	5.4438	5.73421
105542	0.518328	0.0413198	0.0838941	0.548262	0.0530941	0.203173	0.327286	0.208221	0.424406	0.297352	0.182095	0.238347	1.86386	1.60856	2.09896	2.43353	2.44531	2.71638	2.10415	1.96345
105548	0.436503	0.119887	0.189897	0.684535	0.0463529	0.189475	0.42796	0.173206	0.380454	0.179928	0.478905	0.539978	2.05201	1.95332	2.12497	2.7961	2.67119	3.05742	2.25778	2.10606
105549	0.16961	0.378752	0.469155	-0.317583	0.126679	0.297177	-0.109995	0.561249	0.717449	0.377198	0.0792908	0.117904	5.27553	5.69498	5.549	5.76107	5.44837	5.63985	5.76669	5.95758
105552	0.421404	0.403304	0.49307	0.862515	0.163708	0.347939	-0.0520292	0.924541	0.957013	-0.49314	0.352063	0.415486	-1.39488	-1.6527	-1.78192	-0.373828	-1.1154	-1.19051	-2.04965	-1.98141
105558	-0.0433887	0.822796	0.863831	0.144753	0.524147	0.706504	0.140241	0.550335	0.709297	-0.0479006	0.794957	0.829568	3.53248	3.17571	3.26247	3.36641	3.35709	3.54285	3.42932	3.18048
105559	-0.7956	0.0913116	0.154358	-0.0732312	0.911786	0.958926	-1.12304	0.109393	0.28689	-1.84541	0.00588487	0.0154718	3.24347	2.40449	2.30554	1.72133	1.08623	0.735494	1.05469	0.906118
105563	-0.0735724	0.596053	0.671876	0.0625237	0.650575	0.800873	0.0742392	0.591112	0.738179	-0.0618569	0.655479	0.705101	5.70115	5.91402	5.61211	5.85569	5.84576	5.77065	5.74866	5.74242
105566	0.0635042	0.836222	0.874236	-0.885417	0.0138326	0.097064	1.05995	0.0167051	0.0980297	2.00887	8.41501e-05	0.000820601	0.587846	1.0013	0.540007	1.21113	1.98893	1.84512	2.82809	2.77348
105569	0.14573	0.647757	0.717552	-0.914557	0.0486854	0.193891	-0.447741	0.302285	0.495797	0.612546	0.0629491	0.0972223	1.48893	1.31512	1.1056	2.04938	0.954987	1.24245	1.89521	2.13961
105572	-0.123758	0.479639	0.565877	0.427371	0.0388222	0.169737	0.235207	0.199109	0.412448	-0.315921	0.10166	0.14511	5.90586	5.48203	5.60523	5.53525	5.72002	5.89058	5.447	5.30953
105576	0.748079	0.0133547	0.0361619	0.196107	0.476947	0.667155	-0.127398	0.641519	0.773607	0.424575	0.096	0.138221	2.24071	2.09904	3.13456	2.67454	2.82946	2.75435	2.82809	2.35488
105578	1.32264	0.355773	0.446015	1.04086	0.403872	0.60318	1.93462	0.173444	0.380487	2.2164	0.121626	0.168727	-2.61727	-5.74017	-4.10385	-1.51133	-0.629976	-1.19051	-1.20165	-2.71837
105587	1.7941	0.0499491	0.0966517	1.87067	0.0368747	0.165465	1.50279	0.0752745	0.229291	1.42622	0.100565	0.143798	-5.78719	-5.74017	-4.10385	-3.83326	-3.43733	-1.51243	-4.37158	-4.30334
105589	-1.26054	0.0688523	0.123564	-0.722635	0.288546	0.492153	0.327454	0.659823	0.78736	-0.210454	0.664045	0.712581	3.43197	4.21525	2.76232	2.33667	2.95224	2.83026	2.92157	4.3242
105600	1.08798	0.0173564	0.0436989	-0.977936	0.0522189	0.201189	-0.943415	0.0652673	0.210864	1.1225	0.0121402	0.0273924	0.0954492	0.0927249	1.51086	0.810597	-0.267406	0.735494	1.18301	1.25125
105606	-0.408258	0.0361727	0.0757468	-0.2922	0.11459	0.279646	0.249645	0.163338	0.366345	0.133586	0.419009	0.482378	6.85192	6.48775	6.36477	6.16251	6.55561	6.46913	6.77244	6.83686
105607	-0.26719	0.359936	0.450335	0.132614	0.680419	0.820518	0.076374	0.816427	0.889293	-0.32343	0.259528	0.32198	3.84398	4.30012	3.48861	4.16109	3.6607	4.0949	3.78324	3.71347
105608	2.22729	0.000745524	0.00602476	-1.86929	0.00336402	0.047558	-2.07895	0.00205929	0.0363009	2.01763	0.00119095	0.00460519	7.98749	7.0373	10.1241	9.33165	7.69002	7.63795	9.56919	9.49665
105610	1.72129	0.00100898	0.00727685	-0.787074	0.0361693	0.163777	-0.158638	0.637565	0.770942	2.34973	0.000102595	0.00091797	-0.232605	-0.695771	1.02543	1.52429	0.954987	1.24245	1.96827	1.80519
105612	-0.647195	0.218451	0.303095	0.079237	0.885984	0.945979	0.288762	0.626104	0.762472	-0.43767	0.349411	0.4138	4.30794	3.34464	3.68405	2.60968	3.16258	3.76369	3.29376	3.48718
105615	-0.526872	0.0895591	0.152124	-0.567107	0.122617	0.291487	-0.155378	0.66289	0.789202	-0.115143	0.636545	0.688457	2.85305	3.37097	2.71633	2.43353	2.53995	2.32046	2.84759	3.14788
105619	1.88735	0.131222	0.20386	-1.32943	0.252457	0.451475	-0.242389	0.843606	0.907868	2.97439	0.0194052	0.0363896	-1.26363	2.49345	2.66433	2.27527	2.05452	2.4183	3.57679	3.56085
105622	-1.45093	0.000303842	0.00362665	-0.350445	0.30079	0.504238	-1.3947	0.00303432	0.0428611	-2.49519	2.43322e-05	0.000450277	4.88788	4.69967	3.41185	3.26477	2.05452	1.84512	1.96827	2.63918
105623	0.235267	0.285317	0.37399	1.38017	0.000477593	0.0191294	0.327875	0.163666	0.366651	-0.817032	0.00601707	0.0157569	6.26435	6.81706	6.82467	6.7242	7.1028	7.10136	5.59565	5.84768
105625	-1.23805	0.00825191	0.025268	-0.0949183	0.800869	0.894551	-0.908275	0.044599	0.168088	-2.05141	0.00064298	0.00291925	7.29479	7.28238	6.44978	5.65659	5.11342	5.17056	4.80584	5.66964
105626	0.87507	0.0539802	0.102597	-0.687432	0.131534	0.30432	-0.215697	0.628418	0.763953	1.34681	0.00662727	0.0169968	-0.501792	-0.610882	-0.0163865	0.690303	0.263109	-0.0530023	1.12027	0.451552
105634	0.758287	0.00800712	0.0247214	0.487293	0.0747468	0.239239	0.121224	0.612646	0.753432	0.392218	0.0919611	0.133259	2.21843	2.3313	3.09582	2.96116	3.19203	3.11692	2.9413	2.38317
105638	-0.447273	0.161305	0.237842	-0.0450376	0.877676	0.941403	0.26919	0.381042	0.571802	-0.133046	0.646754	0.697349	5.70716	5.2321	5.40988	4.61382	5.25267	5.32992	5.31317	5.36022
105649	-0.398427	0.600979	0.675959	1.66092	0.0580317	0.213531	2.07933	0.0306516	0.135804	0.0199787	0.97788	0.982324	-4.20223	-2.93281	-4.10385	-3.83326	-1.85237	-1.92747	-4.37158	-2.71837
105653	-0.714199	0.0197361	0.0480658	-0.300667	0.278108	0.480946	-0.358076	0.212477	0.429698	-0.771608	0.0129665	0.0288316	5.53867	5.04037	4.74477	4.39074	4.28377	4.1529	4.33923	4.69948
105654	-0.318728	0.0943228	0.15839	-0.0515728	0.779983	0.883041	0.18118	0.36741	0.558721	-0.0859758	0.587096	0.644079	4.21703	3.94107	3.7479	3.77407	4.01388	3.87127	3.86204	4.12712
105659	-0.0907025	0.551289	0.631617	0.0684781	0.650696	0.800939	0.557421	0.0101174	0.0768203	0.398241	0.0249838	0.0447488	4.22543	4.5231	4.24045	4.33165	4.80584	4.87558	4.84517	4.69948
105671	0.170772	0.142226	0.216559	0.329321	0.0228038	0.126244	-0.18135	0.145106	0.341277	-0.339899	0.0151705	0.0298165	4.66916	4.79024	4.91574	4.88442	4.70733	4.73074	4.39991	4.37966
105676	1.7941	0.00521456	0.0180235	0.862575	0.0889441	0.239239	0.494694	0.289907	0.482973	1.42622	0.0148992	0.0294382	-5.78719	-5.74017	-4.10385	-3.83326	-3.43733	-3.51243	-4.37158	-4.30334
105678	1.7941	0.00521456	0.0180235	0.862575	0.0889441	0.239239	0.494694	0.289907	0.482973	1.42622	0.0148992	0.0294382	-5.78719	-5.74017	-4.10385	-3.83326	-3.43733	-3.51243	-4.37158	-4.30334
105679	-0.958052	0.0696652	0.124607	0.239677	0.604043	0.766119	0.83426	0.136564	0.3301	-0.36347	0.376925	0.440687	4.62114	3.8125	3.83279	2.60968	4.03027	4.1529	3.73171	3.97744
105692	0.906158	0.00962187	0.0282804	-0.518979	0.0791072	0.239239	0.284492	0.339711	0.533034	1.70963	0.000175166	0.00127799	0.954273	1.05425	1.62407	2.23283	2.11726	2.26893	2.5942	2.83622
105696	0.796942	0.383696	0.474049	-0.708687	0.46312	0.655615	-0.262358	0.790268	0.872745	1.24327	0.173089	0.228035	-2.61727	-2.57024	-2.51889	-1.0259	-3.43733	-0.705079	-1.56422	-1.13341
105698	0.945444	0.0364705	0.0762501	-0.351485	0.365019	0.567203	0.224116	0.583566	0.733205	1.52105	0.00313923	0.00952947	-0.929213	-1.09631	-0.196959	0.0736314	-0.267406	0.575029	0.672815	0.340521
105699	-1.42195	6.74768e-05	0.00173594	-0.202517	0.342845	0.547293	-0.790126	0.00616689	0.0605229	-2.00956	1.04621e-05	0.000336591	5.11443	5.39875	3.90178	3.7592	3.16258	2.93051	3.25047	3.24356
105700	2.89097	5.11113e-05	0.00157366	1.18311	0.00266901	0.0424764	0.824403	0.0142392	0.0904048	2.53227	0.000110765	0.00096283	0.321331	0.563616	3.0357	3.66659	3.98052	4.32677	3.0293	2.91583
105704	0.41071	0.0069235	0.0222506	0.364571	0.0176787	0.109652	0.2161	0.108395	0.285042	0.262238	0.0403966	0.0666816	8.91053	8.8567	9.16805	9.43135	9.46039	9.55973	9.11482	9.17788
105709	-0.733432	0.0191029	0.0469837	0.019785	0.939465	0.968166	-0.0770706	0.772191	0.86131	-0.830288	0.010278	0.0240377	5.58622	4.93491	4.63424	4.40991	4.33746	4.55903	4.37996	4.4813
105710	1.52874	0.00118473	0.00804778	-0.577589	0.0563052	0.209908	0.703355	0.0399325	0.158298	2.80968	2.19621e-05	0.000429035	2.01371	2.83726	3.86769	4.04326	4.64482	4.66249	5.2523	5.21039
105712	-0.0323774	0.885695	0.912687	-0.365993	0.152571	0.332801	0.41181	0.146779	0.343251	0.745425	0.00709818	0.0179272	3.32915	3.62834	3.64434	3.22202	4.01388	3.70673	4.35974	4.08468
105714	0.552321	0.0857485	0.146948	-1.35364	0.00340759	0.0477104	-0.185698	0.594166	0.740469	1.72026	0.000219958	0.00146528	1.0583	0.526621	1.32242	1.37619	1.31756	1.01113	2.61711	2.41091
105726	-0.327495	0.0680462	0.122504	0.173781	0.379717	0.581782	-0.154925	0.431989	0.618697	-0.656202	0.00406006	0.0115935	3.60298	3.76565	3.33078	3.38591	3.38285	3.02672	2.97715	3.08037
105728	-0.0994662	0.545519	0.626148	0.142554	0.438044	0.635374	0.417533	0.062135	0.205205	0.175512	0.259186	0.321685	2.809	2.94983	2.92957	2.60968	3.19203	3.20181	3.0293	3.08037
105729	-0.575201	0.0251332	0.0577125	-0.050814	0.831842	0.914766	-0.281028	0.270373	0.482973	-0.805415	0.00545409	0.014554	4.84852	4.36967	4.08103	3.98052	3.82006	3.68724	3.68912	3.92067
105731	2.60709	0.00322517	0.0153798	0.862575	0.186076	0.377203	-0.318293	0.588907	0.736736	1.42622	0.0481048	0.0772057	-5.78719	-5.74017	-2.51889	-3.83326	-3.43733	-3.51243	-4.37158	-4.30334
105732	0.0674801	0.545079	0.625823	-0.224687	0.136396	0.31075	-0.859146	0.000468255	0.0196438	-0.56698	0.00170282	0.00595338	4.45479	4.43601	4.51454	4.51104	3.63948	3.66748	3.95485	3.79995
105740	5.92803	0.000150911	0.00254282	1.27608	0.0563291	0.209908	0.576781	0.317269	0.511678	5.22873	0.000331828	0.00188336	-5.78719	-5.74017	-0.196959	0.559058	0.0221008	1.44176	-0.67114	-0.396445
105758	-0.593487	0.0619437	0.114136	-0.0535003	0.850618	0.925774	-0.0151626	0.958301	0.976543	-0.555149	0.0704666	0.106927	5.44223	5.14018	5.07357	4.29086	4.77699	4.59085	4.67554	4.79733
105766	1.44567	0.0105875	0.0304293	-0.681989	0.156362	0.33792	-0.380237	0.426112	0.613816	1.74742	0.00313081	0.00950874	-1.14334	-0.530712	0.144078	1.12094	0.263109	0.188006	0.985972	0.825948
105769	-0.0324216	0.804173	0.8497	0.394511	0.0234442	0.127961	0.0485124	0.725785	0.83138	-0.378421	0.0223498	0.0408525	4.95005	4.72029	4.88199	4.71749	4.88008	4.82296	4.45179	4.46154
105774	0.687892	0.00826706	0.0253079	0.128978	0.512874	0.697705	0.320747	0.146615	0.343069	0.87966	0.00201824	0.0067554	3.77696	3.59746	4.49978	4.2382	4.51104	4.87558	4.6972	4.43476
105777	0.455768	0.0266923	0.0604208	0.101824	0.57867	0.746461	0.201274	0.308989	0.503481	0.555218	0.00915112	0.0219465	3.07699	3.08956	3.41185	3.68244	3.85729	3.62712	3.76285	3.51045
105783	1.08139	0.00757498	0.0238044	0.224126	0.435875	0.633075	0.657598	0.0650312	0.21056	1.51486	0.000858608	0.00361621	1.45121	1.0013	2.32242	2.29602	2.62876	3.29492	2.6837	2.80519
105785	1.7941	0.00521456	0.0180235	0.862575	0.0889441	0.239239	0.494694	0.289907	0.482973	1.42622	0.0148992	0.0294382	-5.78719	-5.74017	-4.10385	-3.83326	-3.43733	-3.51243	-4.37158	-4.30334
105790	-0.110221	0.584865	0.66189	-0.420329	0.0890858	0.239256	0.0147572	0.948857	0.971234	0.324866	0.114275	0.160141	3.8728	4.32458	4.09091	3.8741	3.89359	4.10962	4.41958	4.42798
105802	0.229884	0.0822128	0.142045	0.0340019	0.770031	0.877956	0.366655	0.0149645	0.0927397	0.562538	0.00213873	0.00705774	5.9437	5.78045	6.0497	6.13397	6.5125	6.40494	6.443	6.40661
105806	-0.618099	0.0543519	0.103172	-0.41724	0.175166	0.36306	-0.357449	0.233631	0.455954	-0.558308	0.0762434	0.114082	6.80129	6.53276	6.44015	5.66459	5.72506	5.65999	5.94922	6.26937
105811	0.103897	0.583119	0.660289	0.0787268	0.680314	0.820518	-0.0171114	0.927889	0.959065	0.00805931	0.965717	0.97363	6.56898	6.16635	6.63001	6.31776	6.37805	6.53333	6.42689	6.32693
105813	1.0601	0.00152185	0.00933615	0.371662	0.107625	0.269254	0.561146	0.0350953	0.147088	1.24958	0.000451981	0.00230647	2.50282	2.73151	3.48861	3.88784	4.18472	4.28847	4.02503	3.70229
105814	-0.715978	0.098402	0.16388	0.135395	0.772047	0.879057	-0.149061	0.751501	0.847779	-1.00043	0.0326418	0.0558744	3.84762	4.69342	3.29703	3.84622	3.48153	3.33306	2.97715	3.57318
105829	-0.199431	0.187357	0.267586	-0.0497608	0.758164	0.870473	-0.03731	0.821556	0.893575	-0.18698	0.198584	0.256692	9.39205	9.34277	9.37163	8.94769	9.13466	9.12713	9.10137	9.26141
105830	0.99765	0.151844	0.227204	0.862575	0.221578	0.41907	0.494694	0.46355	0.640386	0.629769	0.341647	0.405721	-4.20223	-5.74017	-4.10385	-3.83326	-3.43733	-3.51243	-4.37158	-4.30334
105832	1.45246	0.188633	0.268999	0.0762886	0.944043	0.970217	-0.318293	0.770389	0.859862	1.05788	0.322102	0.386976	-5.78719	-3.41824	-2.51889	-3.83326	-3.43733	-3.51243	-4.37158	-2.71837
105833	-1.04478	0.0395245	0.0810313	-1.63992	0.00950473	0.0793479	-0.0108238	0.983958	0.991183	0.58431	0.0963186	0.138613	1.35236	1.05425	0.651038	-0.373828	0.650132	-0.342509	1.85724	1.71903
105839	7.76944	5.40514e-06	0.000637427	0.525661	0.123794	0.292768	0.719633	0.04967	0.179221	7.96341	4.6534e-06	0.000254785	-1.8803	0.190572	6.92198	6.90568	7.49562	7.77123	7.27813	6.93686
105848	-0.618434	0.00921319	0.0273975	-0.202374	0.315983	0.519786	-0.197125	0.330327	0.524445	-0.613185	0.00925216	0.0221266	8.20318	7.81286	7.34685	7.43528	7.26398	7.12328	7.31361	7.47925
105851	-0.15136	0.323081	0.413323	-0.0055457	0.969745	0.981753	0.568219	0.00619357	0.0606571	0.422405	0.0240547	0.0434104	5.71415	5.71156	5.68568	5.43587	6.02005	6.23911	6.21994	6.05091
105852	0.208858	0.301886	0.391599	0.164713	0.42462	0.622025	0.408305	0.0890416	0.252867	0.45245	0.0403275	0.0665885	3.75777	4.03955	4.10072	4.11511	4.71749	4.32046	4.48329	4.2163
105858	0.191474	0.190034	0.270415	0.110611	0.424008	0.621511	0.297123	0.0589873	0.199059	0.377987	0.0268873	0.0475588	5.62167	5.52955	5.91435	5.62001	6.09989	6.02866	5.97825	5.92909
105861	-0.530718	0.0187795	0.0463412	0.32083	0.111444	0.274949	-0.181568	0.331568	0.525403	-1.03312	0.000774598	0.00335837	6.11027	5.73607	5.53096	5.25155	5.23863	5.18453	4.81577	4.96579
105864	1.7941	0.0281544	0.0625911	0.0644103	0.918784	0.960091	0.494694	0.46015	0.64033	2.22439	0.0100314	0.0235776	-5.78719	-5.74017	-4.10385	-3.83326	-3.43733	-3.51243	-2.78662	-4.30334
105868	-0.100947	0.676727	0.743024	0.157054	0.560994	0.733008	0.354872	0.237342	0.460659	0.096871	0.663934	0.712526	3.45836	3.0575	3.42753	2.85324	3.48153	3.54285	3.33578	3.37614
105869	0.180008	0.20089	0.283063	-0.180222	0.211033	0.409485	0.316882	0.0574214	0.195712	0.677112	0.00110103	0.00432017	4.07079	4.20088	4.21356	4.42884	4.68679	4.58032	4.85483	4.77081
105875	1.53266	0.151933	0.227281	-0.529723	0.646097	0.796922	-1.44338	0.224365	0.444337	0.619002	0.546547	0.605662	-2.97984	-4.1552	-2.51889	-1.51133	-3.43733	-3.51243	-4.37158	-1.49598
105881	-3.19819	0.000250938	0.00329505	-1.74713	0.0131755	0.0951261	-0.354985	0.533201	0.696348	-1.80604	0.00311207	0.0094687	7.19396	7.53305	4.04081	4.30117	3.87555	3.74495	4.88581	6.22512
105886	1.7941	0.00521456	0.0180235	0.862575	0.0889441	0.239239	0.494694	0.289907	0.482973	1.42622	0.0148992	0.0294382	-5.78719	-5.74017	-4.10385	-3.83326	-3.43733	-3.51243	-4.37158	-4.30334
105890	-0.748939	0.0124955	0.0343972	-0.846079	0.0130418	0.0946633	-0.477689	0.109755	0.287415	-0.380549	0.106995	0.151476	5.15752	4.78242	4.48487	3.92829	3.80107	3.68724	4.61426	4.56394
105893	3.27578	4.15641e-06	0.000613744	0.297389	0.107433	0.269224	0.881782	0.00214977	0.0375141	3.86018	1.02088e-06	0.000202977	-1.39488	-1.49224	1.82689	1.83917	2.71242	2.71638	2.3966	2.43813
105894	-0.38005	0.307417	0.397179	-0.159949	0.756243	0.869271	-0.734753	0.177817	0.386106	-0.954854	0.0353055	0.0594619	2.46547	2.27664	1.56858	2.47052	0.650132	1.84512	1.40978	1.42459
105913	-0.668271	0.178839	0.258522	-0.467342	0.419015	0.617148	-0.965236	0.120979	0.305213	-1.16616	0.0384209	0.0638441	5.30358	5.25772	5.31611	3.84622	3.94637	3.35793	4.23945	3.98668
105917	0.16649	0.623777	0.695731	-1.73915	0.00166336	0.034362	0.184478	0.652326	0.782372	2.09011	0.000118716	0.00100283	1.26809	1.83726	1.51086	1.9481	1.69195	2.10228	3.80335	3.47145
105918	2.00635	0.0021085	0.0116893	-0.0738461	0.84891	0.925136	0.248274	0.553628	0.711773	2.32847	0.000683194	0.00305073	-1.53927	-0.882184	0.419713	1.21113	1.20653	0.879883	1.24313	0.982067
105920	-0.368108	0.0522718	0.100099	-0.0545436	0.755041	0.86881	-0.0133522	0.940638	0.966164	-0.326917	0.0678165	0.103459	4.50167	4.75069	4.12977	4.40036	4.31086	4.18105	4.37325	4.22414
105921	-0.596717	0.00481795	0.0180235	0.634956	0.00887457	0.0762363	0.351532	0.0840194	0.243944	-0.880141	0.000589928	0.002757	3.16991	3.0832	2.58265	2.47052	2.93771	2.82742	2.19828	2.29658
105931	3.06673	5.28495e-07	0.000414725	0.456361	0.0102578	0.0825046	0.422618	0.01531	0.0939056	3.03299	5.24818e-07	0.000169299	1.77505	1.80673	4.75724	4.9644	5.21013	5.34865	4.89755	4.74923
105933	-0.731766	0.003975	0.0177265	0.0884722	0.615698	0.774962	0.0198148	0.910371	0.949427	-0.800424	0.00242619	0.00780147	5.6635	5.98477	4.97029	5.21931	5.20291	5.02284	4.93903	5.10818
105934	2.91198	2.19418e-06	0.000497321	3.2699	2.90224e-06	0.00194672	0.0227872	0.893829	0.939232	-0.335138	0.159861	0.212917	7.88053	7.39643	10.4432	10.6698	10.5754	10.5744	7.16416	7.44669
105938	1.7941	0.00521456	0.0180235	0.862575	0.0889441	0.239239	0.494694	0.289907	0.482973	1.42622	0.0148992	0.0294382	-5.78719	-5.74017	-4.10385	-3.83326	-3.43733	-3.51243	-4.37158	-4.30334
105940	3.16361	4.39635e-05	0.00146667	0.569141	0.272624	0.474637	-2.31796	0.000946911	0.0261024	0.276506	0.521903	0.582027	0.68854	1.75968	4.31822	4.45214	2.29059	1.84512	1.46131	1.52955
105948	1.76544	6.61969e-05	0.00172433	-0.351076	0.103425	0.26276	-0.205817	0.305133	0.498983	1.9107	4.13952e-05	0.000571534	5.01694	5.41022	6.78717	7.17026	6.73385	6.81287	7.17194	7.07658
105949	3.47355	1.79689e-06	0.000497321	0.557347	0.0120926	0.0903386	0.876931	0.00153016	0.0324405	3.79314	9.62531e-07	0.000202977	1.20149	1.62616	4.75102	5.02783	5.68937	5.83408	5.28842	5.12083
105951	1.43616	0.0133597	0.0361672	0.862575	0.0972658	0.253459	0.121572	0.789314	0.872096	0.695159	0.153363	0.205424	-5.05601	-5.00898	-3.37267	-3.83326	-3.43733	-3.51243	-4.37158	-4.30334
105956	-1.38337	0.00253859	0.0132723	-0.618765	0.0965972	0.252663	0.022597	0.945235	0.969147	-0.742005	0.0382986	0.0637065	7.6413	8.33239	6.63846	6.56442	6.53278	6.71518	6.98212	7.50442
105976	-0.58536	0.0146638	0.03868	0.193334	0.414771	0.613698	-0.00457691	0.984383	0.991309	-0.78327	0.0034054	0.0101288	2.8958	2.84104	2.08598	2.50659	2.34403	2.21549	2.16758	2.00045
105978	-0.169905	0.210096	0.293539	0.0616286	0.666787	0.811374	0.0872557	0.558827	0.715606	-0.144278	0.257973	0.320412	4.04411	3.94809	3.82096	3.83208	4.03027	3.80045	3.86204	3.84132
105979	0.342519	0.13302	0.206011	0.222362	0.374996	0.578064	0.0761582	0.759394	0.852933	0.196315	0.343933	0.408208	2.58349	2.27664	2.86193	2.67454	3.07046	2.63731	2.5942	2.66245
105981	0.159213	0.428232	0.516614	0.282075	0.261873	0.462932	-0.205574	0.396409	0.586385	-0.328436	0.13533	0.184648	3.81086	3.58402	3.73535	3.99329	3.5739	3.72597	3.59996	3.13129
105995	-0.106454	0.515888	0.599401	-0.0800538	0.716043	0.843449	-0.549768	0.0370782	0.150993	-0.576168	0.00976442	0.023088	2.6516	2.49345	2.49606	2.43353	1.92022	1.91383	2.10415	1.88649
105998	1.7941	0.00521456	0.0180235	0.862575	0.0889441	0.239239	0.494694	0.289907	0.482973	1.42622	0.0148992	0.0294382	-5.78719	-5.74017	-4.10385	-3.83326	-3.43733	-3.51243	-4.37158	-4.30334
105999	1.7941	0.00521456	0.0180235	0.862575	0.0889441	0.239239	0.494694	0.289907	0.482973	1.42622	0.0148992	0.0294382	-5.78719	-5.74017	-4.10385	-3.83326	-3.43733	-3.51243	-4.37158	-4.30334
106004	0.975834	0.0366448	0.0764871	0.808483	0.112369	0.276171	0.081241	0.852684	0.913612	0.248592	0.543138	0.602721	0.98099	1.98093	2.37188	2.54178	2.75249	2.32046	1.81824	1.6274
106010	-0.0525412	0.727561	0.786467	-0.151236	0.446034	0.642436	-0.555851	0.0232607	0.11757	-0.457156	0.0189786	0.0357414	3.75777	3.57951	3.64434	3.58459	2.97206	3.14578	3.07963	3.34772
106011	-0.164874	0.16827	0.246166	-0.112563	0.35833	0.560636	-0.318432	0.0304447	0.135514	-0.370743	0.0114793	0.0262422	5.04807	5.13097	4.97564	4.87064	4.57948	4.63222	4.76028	4.6768
106013	1.04377	0.0397698	0.0814223	0.0327689	0.924504	0.962233	1.38146	0.0125898	0.0849955	2.39246	0.000355928	0.0019702	1.43197	2.29875	2.49606	3.36641	4.32422	4.24912	4.0755	4.43476
106015	-0.144543	0.412405	0.501933	0.693108	0.0109029	0.0854319	0.341819	0.125909	0.312832	-0.495832	0.0224731	0.0410277	3.34466	3.40958	3.42753	3.01223	3.45749	3.68724	2.84759	2.91583
106017	-0.682287	0.0212942	0.0509149	1.02176	0.00518726	0.0575696	1.11889	0.00438554	0.0509686	-0.585161	0.0288709	0.0504839	1.64743	1.67769	0.940545	1.02472	2.29059	1.91383	1.24313	0.906118
106019	0.859601	0.0360357	0.0755612	1.14535	0.0103344	0.0829535	1.27522	0.00731742	0.0655219	0.989463	0.0184145	0.0348384	-1.39488	-1.6527	-0.933924	-0.373828	0.650132	0.575029	-0.464689	-0.602895
106022	-1.83167	0.000146549	0.00250245	-1.19555	0.00529378	0.0582365	-1.2688	0.00420271	0.0498644	-1.90492	0.000104786	0.000930601	6.59678	6.5713	4.90458	4.58881	3.63948	3.33306	4.37325	4.98899
106025	-1.39578	0.000993511	0.00721323	-1.14382	0.0233636	0.12771	-2.14515	0.00103812	0.0270197	-2.39712	7.52626e-05	0.000778272	5.44942	5.72693	4.3266	4.04326	2.11726	1.97942	2.80833	3.58541
106028	-0.694653	0.00561615	0.0190366	-1.00922	0.000897981	0.0255413	0.381396	0.0619741	0.20508	0.695962	0.00577499	0.0152465	5.84353	6.18872	5.15118	5.49542	5.72002	5.68478	6.72711	6.69596
106029	-0.794119	0.0215459	0.0513788	0.104057	0.72393	0.849715	0.630584	0.0787827	0.235088	-0.267592	0.303452	0.36824	8.94789	9.17363	8.44618	8.07275	8.85136	8.94058	8.41039	9.18212
106032	-0.358652	0.395972	0.486097	0.439636	0.395638	0.595577	-0.360805	0.471077	0.647114	-1.15909	0.0284655	0.0499286	-1.49736	-1.02647	-1.65495	-1.58837	-1.48873	-2.46979	-2.43047	-2.41581
106037	1.7941	0.00521456	0.0180235	0.862575	0.0889441	0.239239	0.494694	0.289907	0.482973	1.42622	0.0148992	0.0294382	-5.78719	-5.74017	-4.10385	-3.83326	-3.43733	-3.51243	-4.37158	-4.30334
106038	1.7941	0.00521456	0.0180235	0.862575	0.0889441	0.239239	0.494694	0.289907	0.482973	1.42622	0.0148992	0.0294382	-5.78719	-5.74017	-4.10385	-3.83326	-3.43733	-3.51243	-4.37158	-4.30334
106042	3.75616	0.000148541	0.00251889	2.81901	0.000748462	0.0236066	0.489074	0.27657	0.482973	1.42622	0.0292713	0.0511167	-5.78719	-5.74017	-1.78192	-2.2483	-1.85237	-1.19051	-4.37158	-4.30334
106051	0.127991	0.577188	0.655127	-0.468786	0.168492	0.354196	-0.826794	0.0323821	0.140397	-0.230017	0.330007	0.394962	2.36255	2.69446	2.59659	2.72133	1.60706	2.04215	2.49879	2.08898
106057	2.89748	0.000288178	0.00351753	-0.594777	0.0921708	0.244532	0.906963	0.0324655	0.140605	4.39922	1.73817e-05	0.00039608	0.587846	1.479	3.50348	4.40036	4.84344	4.82296	5.45338	5.4023
106064	0.00698617	0.969718	0.97725	0.134127	0.459167	0.65251	1.0463	0.00156776	0.0325152	0.919159	0.000690325	0.00307452	2.31609	2.09904	2.16294	2.27527	3.16258	3.35793	3.19066	3.06299
106066	-0.408427	0.0585634	0.109204	0.0423351	0.821794	0.908739	0.0998741	0.604915	0.747827	-0.350888	0.0876119	0.128091	5.52171	5.05669	4.94327	4.8142	4.89806	5.06121	4.88345	4.99358
106067	0.0484106	0.831891	0.871386	0.204888	0.400201	0.600134	0.568195	0.056513	0.193777	0.411717	0.0853784	0.125579	3.72653	3.58851	3.396	4.05548	4.41442	4.13862	4.13225	4.005
106068	0.00284691	0.9827	0.986668	0.178211	0.270378	0.471696	-0.216476	0.189568	0.400687	-0.39184	0.0202638	0.037645	4.09698	4.28912	4.16761	4.22744	3.87555	4.08002	3.82318	3.77881
106071	-0.150547	0.479542	0.56585	0.0505925	0.857321	0.929005	-0.424209	0.161563	0.36408	-0.625349	0.0212006	0.0391355	1.90629	1.77553	1.51086	1.89466	1.08623	1.44176	1.24313	1.18852
106072	0.627057	0.524495	0.60739	0.0762886	0.938482	0.968037	0.494694	0.632282	0.767011	1.04546	0.28539	0.34949	-3.46527	-5.74017	-4.10385	-3.83326	-3.43733	-3.51243	-4.37158	-2.71837
106078	0.95297	0.0196196	0.0478797	0.267487	0.413738	0.612549	0.22842	0.48359	0.65414	0.913902	0.0228052	0.0415322	4.04728	4.80808	5.07357	5.69617	5.65278	5.56705	5.46605	5.21827
106080	2.57755	0.0351313	0.0739946	-1.23388	0.234188	0.432504	-0.644676	0.534428	0.697532	3.16675	0.0127723	0.0285274	-5.78719	-3.41824	-2.51889	-1.51133	-3.43733	-1.92747	-0.912148	-1.98141
106084	0.0112854	0.939336	0.954368	0.672263	0.00314981	0.0462437	0.204024	0.20227	0.416402	-0.456953	0.0179524	0.034117	5.42165	5.12015	5.28632	5.27788	5.58226	5.39145	4.88345	4.74379
106088	-0.389449	0.301121	0.390862	0.227157	0.536092	0.714335	0.0212975	0.952995	0.973716	-0.595308	0.133838	0.182863	6.4527	5.63759	6.04463	5.2674	5.77456	5.58296	5.33059	5.57165
106092	-0.30595	0.2504	0.337792	0.144312	0.575808	0.744342	-0.2166	0.408887	0.598097	-0.666862	0.0317339	0.0545708	6.30126	5.62013	5.80154	5.50882	5.39239	5.48475	5.17338	5.41605
106093	-0.121186	0.555251	0.635059	0.468262	0.0754611	0.239239	0.115017	0.618216	0.756891	-0.474431	0.0493652	0.078942	4.35874	4.08956	3.84452	4.39074	4.19929	4.23576	3.75254	3.74651
106094	-0.92523	0.0799456	0.138838	-0.960995	0.251178	0.449957	-2.05479	0.0294131	0.13279	-2.01902	0.00596643	0.0156551	4.3174	4.30286	4.19536	2.47052	1.42065	1.24245	2.31492	2.26652
106095	1.18238	0.00878154	0.0265694	-0.139542	0.718772	0.845414	-0.392448	0.332051	0.525718	0.929477	0.0232393	0.042175	2.34723	1.87454	2.88484	3.7592	2.79149	3.01113	3.17531	2.90612
106104	0.639472	0.517426	0.600778	0.0644103	0.948147	0.972047	0.494694	0.632959	0.767157	1.06976	0.276268	0.339428	-5.78719	-3.41824	-4.10385	-3.83326	-3.43733	-3.51243	-2.78662	-4.30334
106107	-0.154277	0.434853	0.523226	0.15947	0.461022	0.654199	-0.0153937	0.942776	0.967415	-0.329141	0.118233	0.164806	4.71464	4.28912	4.4079	4.28048	4.32422	4.33932	4.31842	4.02309
106110	1.48572	0.000385236	0.0041002	1.6157	0.000106518	0.00960104	1.75685	9.57022e-05	0.0100202	1.62687	0.000169785	0.00125395	1.66402	2.06073	3.13456	3.58459	5.10725	5.09859	3.54131	3.43137
106111	1.96458	0.061249	0.113098	0.862517	0.348698	0.552438	0.497644	0.57919	0.730345	1.59971	0.110874	0.156318	-2.97984	-5.74017	-2.51889	-2.2483	-1.85237	-1.92747	-2.78662	-2.71837
106118	-1.29981	0.106914	0.17431	1.0725	0.348437	0.552279	-1.31256	0.214936	0.432554	-3.68487	0.00414212	0.0117435	-0.263632	0.563616	-0.518887	-1.83326	-3.43733	-1.51243	-2.78662	-4.30334
106129	-0.119325	0.649506	0.719257	-1.02626	0.0346085	0.160111	-1.61483	0.00471045	0.053394	-0.707898	0.033044	0.0564737	1.93391	1.49824	1.72904	1.45214	0.0221008	-0.0530023	0.837874	1.18852
106135	-0.665231	0.0741371	0.130883	-0.250554	0.468101	0.659748	0.272105	0.427959	0.615419	-0.142572	0.664469	0.712908	6.94455	6.56047	6.57651	5.60761	6.3391	6.38238	6.49028	6.73215
106140	1.7941	0.00521456	0.0180235	0.862575	0.0889441	0.239239	0.494694	0.289907	0.482973	1.42622	0.0148992	0.0294382	-5.78719	-5.74017	-4.10385	-3.83326	-3.43733	-3.51243	-4.37158	-4.30334
106151	-1.42208	0.00440161	0.0180235	-0.584022	0.233034	0.431708	-0.734605	0.152779	0.351904	-1.57266	0.00220504	0.00722663	4.51087	4.15314	3.33078	2.43353	2.44531	1.91383	2.49879	3.02758
106152	0.208345	0.400246	0.489983	0.284915	0.319714	0.523759	0.208812	0.469325	0.645748	0.132242	0.571955	0.629493	3.41493	2.84104	3.24488	3.44287	3.52845	3.56438	3.22088	3.304
106153	-0.253662	0.174223	0.2532	0.530587	0.0279036	0.142242	-0.282528	0.165839	0.369784	-1.06678	0.000718756	0.00317979	5.26334	4.88097	4.83573	4.79974	4.56829	4.50437	3.86204	4.15199
106158	-0.350468	0.0412115	0.0837278	0.210895	0.180159	0.370181	0.278318	0.0902578	0.254504	-0.283045	0.0833603	0.123036	6.59912	6.35885	6.25919	6.00121	6.37485	6.44031	6.21994	6.17341
106161	-1.52454	0.000159061	0.00260076	-0.580815	0.0269492	0.139414	-0.122276	0.565368	0.721189	-1.066	0.0011302	0.00440994	6.77767	6.93777	5.26902	5.39796	5.44225	4.98342	5.60999	5.97163
106171	0.356975	0.281481	0.369892	-1.80029	0.00142351	0.0313988	-0.724554	0.086562	0.248247	1.43271	0.00170598	0.00595507	-1.39488	-1.6527	-1.29649	-1.0259	-1.85237	-1.92747	-0.123652	-0.0554077
106174	0.963187	0.00758082	0.0238055	0.942459	0.00788925	0.072195	0.437528	0.121877	0.30658	0.458256	0.111031	0.156484	5.47901	4.69342	6.0598	6.03865	6.44837	6.52511	5.63545	5.45322
106177	2.88773	0.000257258	0.0033268	-0.0387068	0.923398	0.96192	-0.534374	0.209504	0.425932	2.39206	0.000780083	0.00337847	-1.39488	-0.785969	1.56858	2.04938	1.51687	1.01113	1.6057	0.982067
106179	1.7941	0.00521456	0.0180235	0.862575	0.0889441	0.239239	0.494694	0.289907	0.482973	1.42622	0.0148992	0.0294382	-5.78719	-5.74017	-4.10385	-3.83326	-3.43733	-3.51243	-4.37158	-4.30334
106183	0.434828	0.0494764	0.0960441	-0.163491	0.394938	0.5952	0.222743	0.255647	0.482741	0.821062	0.00354225	0.0104293	6.18543	5.77356	6.36884	6.46021	6.54138	6.73431	6.93619	6.66605
106184	-0.626509	0.0312441	0.0677931	-0.158264	0.606451	0.767614	-0.227653	0.476175	0.651028	-0.695898	0.0168523	0.0324853	2.48427	2.59968	2.19993	1.59301	1.84807	1.53196	1.96827	1.71903
106189	1.76365	0.0652522	0.118691	-1.45907	0.102288	0.260878	-0.271304	0.751537	0.847779	2.95141	0.00627063	0.0162903	-4.20223	-5.74017	-4.10385	-2.2483	-3.43733	-3.51243	-2.04965	-1.98141
106194	-0.436337	0.26369	0.351234	0.067022	0.855517	0.928748	0.369786	0.335163	0.528468	-0.133573	0.718631	0.761504	6.30589	5.33732	5.72429	5.04018	5.76968	5.74259	5.58697	5.79074
106197	1.39305	0.249215	0.336535	-0.129525	0.913961	0.959687	-0.271304	0.823063	0.894806	1.25128	0.290475	0.3547	-3.46527	-5.74017	-4.10385	-2.2483	-3.43733	-3.51243	-4.37158	-2.30334
106198	0.773006	0.401398	0.491142	2.3101	0.0913008	0.243112	-0.554034	0.596139	0.741713	-2.09112	0.0905044	0.131531	-0.625306	-1.46218	0.298054	-0.869785	0.30683	-1.92747	-4.37158	-1.87038
106207	1.6609	9.09564e-05	0.00199254	0.0245452	0.887853	0.947213	0.679028	0.0096011	0.0753578	2.31538	7.49215e-06	0.000293201	2.08932	1.92517	3.82096	3.49766	4.35057	4.34555	4.46762	4.17645
106212	0.0390264	0.799642	0.845697	0.542713	0.010908	0.0854319	0.461725	0.0234127	0.117913	-0.0419611	0.779995	0.816908	4.49242	4.45089	4.67423	4.33165	4.8891	5.05362	4.35974	4.5008
106223	0.20927	0.851178	0.885759	0.255912	0.813006	0.903122	1.28033	0.292753	0.485905	1.23369	0.257929	0.320391	-4.20223	-4.1552	-4.10385	-3.83326	-1.85237	-3.51243	-4.37158	-1.49598
106224	-0.63442	0.121855	0.19242	0.395196	0.374169	0.577238	0.496422	0.294406	0.487856	-0.533195	0.154071	0.206188	1.08317	1.479	0.850347	0.414668	0.650132	1.61685	0.837874	0.650861
106231	0.545945	0.0182959	0.0454486	0.943655	0.000695008	0.0228355	1.70322	5.22152e-05	0.00835972	1.30551	0.000111088	0.000964321	2.85197	2.61871	3.14976	3.43165	4.8846	5.08376	3.99649	4.08812
106232	1.7941	0.00521456	0.0180235	0.862575	0.0889441	0.239239	0.494694	0.289907	0.482973	1.42622	0.0148992	0.0294382	-5.78719	-5.74017	-4.10385	-3.83326	-3.43733	-3.51243	-4.37158	-4.30334
106233	1.72982	0.018531	0.0458797	-0.025208	0.945845	0.971045	2.0233	0.00502486	0.0548735	3.77833	0.000128231	0.00105121	-1.39488	-0.3139	0.288468	1.52429	2.69195	3.08748	2.84759	2.99129
106234	1.39197	0.00314993	0.0152783	-0.141162	0.52727	0.708338	2.47154	7.58425e-05	0.00905257	4.00467	2.92962e-06	0.000242508	1.39272	1.92517	2.76652	3.36641	5.3473	5.68969	5.69585	5.62592
106235	1.7941	0.00521456	0.0180235	0.862575	0.0889441	0.239239	0.494694	0.289907	0.482973	1.42622	0.0148992	0.0294382	-5.78719	-5.74017	-4.10385	-3.83326	-3.43733	-3.51243	-4.37158	-4.30334
106237	0.317574	0.367652	0.457495	-0.879413	0.015074	0.101594	1.38869	0.00642969	0.0618909	2.58568	3.317e-05	0.000512846	0.190086	0.449659	0.288468	1.02472	1.77212	2.26893	2.95035	2.85654
106238	0.0512432	0.921401	0.940871	-0.596007	0.21853	0.417941	1.43278	0.0352951	0.147255	2.08003	0.00168386	0.00590092	-0.501792	-0.695771	-1.29649	0.254204	1.20653	0.575029	1.4864	1.47802
106239	-0.154839	0.540193	0.621429	0.721756	0.0134876	0.0960464	2.54227	3.45403e-05	0.00790959	1.66567	0.000191366	0.00134	3.7539	4.20381	3.57563	4.10338	6.24391	6.48897	5.67963	5.60955
106240	0.249718	0.245561	0.332994	0.317609	0.132821	0.305993	2.26611	2.05385e-05	0.00751473	2.19822	1.69031e-05	0.000394755	3.81829	4.29463	4.19536	4.42884	6.48897	6.65624	6.29642	6.21335
106243	-0.645345	0.000993187	0.00721323	0.00451965	0.968679	0.981257	1.6421	4.07705e-06	0.00695195	0.992233	8.70518e-05	0.000833909	5.686	5.77307	5.06858	5.10043	6.6855	6.76718	6.80646	6.63698
106251	0.52502	0.51179	0.595799	0.0761484	0.933892	0.966095	-0.632636	0.491369	0.661216	-0.183764	0.819842	0.850702	-3.46527	-2.77669	-3.61842	-1.51133	-3.43733	-3.02701	-3.88615	-2.71837
106254	0.377979	0.170406	0.248556	-0.218907	0.264067	0.465501	2.50021	3.5196e-05	0.00790959	3.0971	2.58624e-06	0.000242508	2.07699	2.62178	2.74164	2.7059	5.14387	5.30455	5.52778	5.36022
106257	-1.85166	0.020948	0.0502482	-0.365547	0.574079	0.743108	0.976458	0.229946	0.451643	-0.50965	0.300732	0.365273	2.64326	3.74566	0.850347	1.89466	2.11726	2.50993	2.74736	2.61553
106261	0.573323	0.140209	0.214144	-0.296273	0.427608	0.624945	0.401013	0.338415	0.5317	1.27061	0.00478964	0.0131393	1.66402	1.92517	2.18155	2.57613	2.23509	3.28198	2.90454	3.22805
106262	-0.0168826	0.92036	0.9403	0.15701	0.375416	0.578414	0.74375	0.00601706	0.0599496	0.569857	0.00686607	0.0174629	3.2708	3.27943	3.27119	3.24356	3.87555	4.12419	3.68912	4.005
106268	1.7941	0.00521456	0.0180235	0.862575	0.0889441	0.239239	0.494694	0.289907	0.482973	1.42622	0.0148992	0.0294382	-5.78719	-5.74017	-4.10385	-3.83326	-3.43733	-3.51243	-4.37158	-4.30334
106271	3.6099	0.0100804	0.0292465	-0.810122	0.404712	0.603982	-0.524741	0.594264	0.740469	3.89528	0.00627262	0.0162903	-5.78719	-4.1552	-2.51889	-0.132819	-1.85237	-1.92747	-0.67114	-1.49598
106272	1.81064	0.0673686	0.121511	0.0644103	0.942	0.969222	-0.318293	0.720588	0.828311	1.42793	0.129773	0.178297	-4.20223	-5.74017	-2.51889	-3.83326	-3.43733	-3.51243	-2.78662	-4.30334
106275	-0.53865	0.0169628	0.0429686	0.520624	0.0733767	0.239239	-0.612371	0.0334422	0.143327	-1.67164	9.91773e-05	0.000898846	3.68854	3.51013	3.17228	2.93493	2.31756	2.57503	2.08785	1.76275
106276	3.69093	0.000174088	0.00271623	-0.00689318	0.988209	0.993118	0.204461	0.673353	0.797889	3.90228	0.000105586	0.000933537	3.62432	4.84761	7.44834	8.42854	8.05202	8.21165	8.17989	8.09728
106277	0.0839448	0.827842	0.868423	0.445231	0.32921	0.532951	0.189054	0.670178	0.79547	-0.172231	0.654903	0.704735	9.38089	10.2637	9.51786	10.3179	10.1376	10.0471	9.49096	9.80527
106297	-0.349514	0.0351936	0.0740977	0.211221	0.184679	0.376294	0.467706	0.0200414	0.108882	-0.0930293	0.465434	0.52693	3.63697	3.684	3.29703	3.32661	3.89359	3.66748	3.62277	3.51045
106302	-1.55314	0.00950258	0.028025	-0.363123	0.527337	0.708338	-0.384613	0.518223	0.683104	-1.57463	0.00665112	0.0170397	4.22822	4.18909	3.42753	1.78145	2.44531	2.10228	2.49879	2.77348
106305	0.0460078	0.959505	0.969989	-1.34918	0.17341	0.361099	0.238295	0.814543	0.888295	1.63348	0.0741121	0.111467	-2.97984	-0.610882	-1.29649	-2.2483	-1.85237	-1.19051	-0.123652	-0.215872
106307	0.308265	0.0556956	0.105071	0.769206	0.00202794	0.037902	0.136476	0.38772	0.5779	-0.324465	0.0522475	0.0829511	3.84034	3.85789	4.21655	4.09155	4.15513	4.42809	3.4422	3.60955
106312	0.315962	0.0566639	0.106443	0.361916	0.0342791	0.159081	0.259975	0.0986628	0.269392	0.214022	0.162185	0.215621	5.28895	5.23783	5.47923	5.68047	5.7351	5.94289	5.56653	5.38841
106315	0.639377	0.497263	0.581838	1.38565	0.169139	0.355029	1.28541	0.20364	0.418429	0.53913	0.558602	0.616627	-1.22282	-3.41824	-2.51889	-0.773212	-0.437331	-0.342509	-2.04965	-1.49598
106316	-0.288965	0.152129	0.227516	0.0307294	0.869711	0.936237	-0.0529515	0.779227	0.86576	-0.372646	0.0770951	0.115199	5.71911	5.38202	5.45266	5.06459	5.14387	5.2722	5.16952	5.18651
106321	0.374026	0.0802433	0.139274	-0.5791	0.0611016	0.219856	-1.18871	0.00287555	0.0417622	-0.235582	0.248317	0.31023	3.16991	3.49585	3.84452	3.55045	2.34403	2.68527	3.06305	3.13129
106331	2.37142	1.12415e-05	0.000860122	0.165122	0.406468	0.605769	0.48799	0.0367797	0.150395	2.69429	5.53949e-06	0.000269875	3.32394	3.7834	5.90598	5.94317	6.32256	6.50298	6.38414	6.11135
106332	1.7941	0.00521456	0.0180235	0.862575	0.0889441	0.239239	0.494694	0.289907	0.482973	1.42622	0.0148992	0.0294382	-5.78719	-5.74017	-4.10385	-3.83326	-3.43733	-3.51243	-4.37158	-4.30334
106335	-2.34761	0.109992	0.178039	0.0893117	0.95856	0.976364	-0.237857	0.89	0.936859	-2.67478	0.0764824	0.114369	-0.657911	0.488654	-4.10385	-0.663334	-3.43733	-1.92747	-4.37158	-1.13341
106337	-0.0639206	0.768029	0.820464	0.132134	0.640946	0.792872	-0.374458	0.208067	0.424239	-0.570512	0.034857	0.0589089	3.48193	3.07041	3.34736	3.06156	3.00561	2.67739	2.6837	2.73009
106342	2.5601	0.0193383	0.0473968	1.66128	0.0863571	0.239239	0.527404	0.52482	0.689288	1.42622	0.141302	0.191359	-5.78719	-5.74017	-4.10385	-2.2483	-3.43733	-1.92747	-4.37158	-4.30334
106344	-0.804202	0.0138507	0.0372012	-1.08335	0.00844104	0.0744658	-1.11764	0.00775337	0.0675998	-0.838491	0.0106595	0.0247533	5.43137	5.79268	5.11774	4.47508	3.82006	3.56438	4.72908	4.8182
106346	3.70994	0.00148278	0.00920358	-0.212701	0.689882	0.826386	1.04388	0.120322	0.304142	4.96652	0.000183829	0.00130964	-4.20223	-4.1552	-1.29649	0.414668	0.263109	0.879883	0.672815	0.906118
106349	0.192097	0.353268	0.443465	0.394084	0.080092	0.239239	0.641391	0.0150028	0.0928788	0.439404	0.0567463	0.0890513	5.03378	4.48986	5.01249	4.89125	5.51395	5.67492	5.21526	5.18651
106355	0.139347	0.851646	0.886004	-0.153189	0.863555	0.93288	-0.331675	0.71491	0.824221	-0.0391383	0.957174	0.966568	0.479593	-0.785969	0.940545	-1.0259	-0.629976	-0.0530023	0.0207379	-0.396445
106356	2.32786	1.42954e-05	0.000969479	0.528554	0.0177483	0.109878	0.750042	0.00465338	0.0530199	2.54935	6.45438e-06	0.000278121	1.54372	2.02139	4.02027	4.20566	4.79629	4.91802	4.37996	4.27787
106358	1.7941	0.00521456	0.0180235	0.862575	0.0889441	0.239239	0.494694	0.289907	0.482973	1.42622	0.0148992	0.0294382	-5.78719	-5.74017	-4.10385	-3.83326	-3.43733	-3.51243	-4.37158	-4.30334
106359	1.7941	0.034134	0.0724694	1.64821	0.0407923	0.174104	1.28033	0.0901037	0.254408	1.42622	0.0737507	0.111021	-5.78719	-5.74017	-4.10385	-3.83326	-1.85237	-3.51243	-4.37158	-4.30334
106367	1.33355	0.0426649	0.0859346	0.550658	0.32757	0.531476	0.647486	0.269929	0.482973	1.43037	0.0294411	0.0513548	-1.8803	-1.34785	-0.196959	-0.373828	1.08623	-0.342509	0.0207379	-0.396445
106369	-0.904971	0.00128257	0.00839754	0.344646	0.169826	0.356058	-1.13955	0.00126339	0.0291117	-2.38917	1.08189e-05	0.000337769	5.66659	5.32121	4.49234	4.69422	3.59609	3.30775	3.06305	3.14788
106371	0.590661	0.294617	0.383861	1.39376	0.23404	0.432497	-1.9061	0.0563124	0.193351	-2.70919	0.0182515	0.0346068	2.31609	3.27664	2.66433	4.19465	1.42065	1.53196	-0.0496515	0.220227
106385	-0.492562	0.00257183	0.0133843	-0.493132	0.00321637	0.0467567	-0.294841	0.0324965	0.140689	-0.294271	0.0251918	0.0450673	5.59597	5.61574	5.13694	5.08858	4.8891	4.74966	5.30261	5.32055
106387	1.7941	0.00521456	0.0180235	0.862575	0.0889441	0.239239	0.494694	0.289907	0.482973	1.42622	0.0148992	0.0294382	-5.78719	-5.74017	-4.10385	-3.83326	-3.43733	-3.51243	-4.37158	-4.30334
106388	1.55268	0.012742	0.0349146	0.862575	0.104836	0.264998	0.494694	0.316297	0.511146	1.1848	0.0376733	0.0628732	-5.78719	-5.25474	-4.10385	-3.83326	-3.43733	-3.51243	-4.37158	-4.30334
106390	1.7941	0.00521456	0.0180235	0.862575	0.0889441	0.239239	0.494694	0.289907	0.482973	1.42622	0.0148992	0.0294382	-5.78719	-5.74017	-4.10385	-3.83326	-3.43733	-3.51243	-4.37158	-4.30334
106394	-0.491471	0.228878	0.31517	-0.604253	0.416326	0.614808	-2.76309	0.00428964	0.0504356	-2.65031	0.00125399	0.00477132	4.6936	4.94546	4.92682	3.66659	1.46956	1.65749	2.00346	2.34052
106396	-0.237865	0.426798	0.515457	1.27537	0.0134268	0.095851	-0.1917	0.58303	0.732917	-1.70494	0.00183943	0.0062963	4.36382	4.07842	4.41579	3.49766	3.82006	3.76369	2.3966	2.63918
106397	-0.187081	0.431539	0.519973	0.565537	0.0948487	0.249364	-0.0169586	0.95364	0.974041	-0.769577	0.0150967	0.0297105	2.90977	2.58626	2.43531	2.7059	2.29059	2.79135	1.85724	2.10606
106404	1.41039	0.146282	0.221549	0.496519	0.62725	0.783718	-0.657748	0.505937	0.673004	0.25612	0.783585	0.819577	-3.46527	-3.41824	-2.51889	-1.51133	-1.85237	-3.51243	-4.37158	-1.98141
106406	1.7941	0.00521456	0.0180235	0.862575	0.0889441	0.239239	0.494694	0.289907	0.482973	1.42622	0.0148992	0.0294382	-5.78719	-5.74017	-4.10385	-3.83326	-3.43733	-3.51243	-4.37158	-4.30334
106409	0.520766	0.0531092	0.101264	-0.251983	0.305754	0.509277	-0.561238	0.0463456	0.172026	0.211511	0.368549	0.432419	6.3896	7.00949	7.23544	7.20085	6.53565	6.77874	6.86443	6.95346
106413	-1.1809	0.191755	0.272507	-0.288859	0.76332	0.87408	0.0998784	0.920215	0.955103	-0.792165	0.335237	0.40066	-2.08675	-1.09631	-1.78192	-3.83326	-3.43733	-1.92747	-2.78662	-1.98141
106418	0.212339	0.129305	0.201625	0.299324	0.0500778	0.196989	-0.000866571	0.994624	0.996753	-0.0878514	0.49464	0.55562	4.93476	5.18687	5.32032	5.22473	5.25267	5.2917	4.94809	4.99816
106421	0.485546	0.125127	0.196412	0.116395	0.686075	0.823677	0.440592	0.16791	0.372592	0.809744	0.022022	0.0403833	4.09086	4.5042	4.43918	5.15258	5.09015	5.35484	5.24864	4.96579
106438	-0.353996	0.146205	0.2215	0.711827	0.021938	0.123903	0.561747	0.0564999	0.193777	-0.504076	0.0491441	0.0786095	4.08471	3.71722	3.76034	3.30629	3.96355	4.24912	3.37661	3.41776
106441	0.155263	0.425296	0.514059	0.109463	0.673714	0.816225	-0.58288	0.0504824	0.181112	-0.53708	0.0302444	0.052524	2.81643	2.98435	2.90738	3.22202	2.34403	2.59609	2.54728	2.1724
106444	-0.0940456	0.847914	0.883364	0.850636	0.13695	0.311226	0.947642	0.112452	0.291462	0.00296121	0.995006	0.995757	-1.81818	-0.770232	-1.60305	-1.16878	-0.377283	-0.512434	-1.09956	-1.49598
106449	1.0821	0.000944837	0.00704848	-0.0684167	0.719809	0.846466	0.915495	0.00227209	0.0383309	2.06602	2.35864e-05	0.000441982	3.87992	4.18613	4.91017	5.32913	6.04043	6.0209	6.19922	5.9993
106453	-0.0699407	0.619924	0.692311	0.457999	0.0182379	0.111864	0.538374	0.0111369	0.0806806	0.0104342	0.93678	0.949588	3.68245	3.53828	3.44305	3.65056	4.12491	4.03446	3.66734	3.57318
106454	-0.57368	0.294842	0.384111	-0.577279	0.344757	0.549255	0.17243	0.788897	0.871797	0.176029	0.699432	0.744862	0.885231	0.0411946	0.144078	-0.373828	-0.267406	0.394457	1.05469	0.220227
106458	1.7941	0.0338653	0.0721081	1.66092	0.0290754	0.145373	2.07933	0.013908	0.0895224	2.21251	0.0127535	0.0285014	-5.78719	-5.74017	-4.10385	-3.83326	-1.85237	-1.92747	-4.37158	-2.71837
106469	-0.287079	0.13175	0.204522	-0.0574562	0.766048	0.875664	-0.566537	0.0208111	0.111092	-0.79616	0.00286541	0.00889274	5.29562	5.15465	4.85325	5.02783	4.56829	4.18105	4.2902	4.57011
106479	-0.502266	0.0212621	0.0508586	0.27168	0.22487	0.422721	-0.389465	0.0929596	0.259063	-1.16341	0.000430891	0.0022317	4.64848	4.53945	3.91296	4.29086	3.80107	3.60651	3.55323	3.304
106481	2.78617	0.000244249	0.00324785	-0.437356	0.27208	0.474022	0.0937544	0.808446	0.883907	3.31728	7.96684e-05	0.000799766	3.84034	5.04365	7.09029	7.36825	7.36438	7.28117	7.78608	7.73387
106489	-0.0664149	0.653971	0.722826	-0.449675	0.036563	0.164566	-0.322515	0.115304	0.29631	0.0607446	0.661893	0.710975	3.65368	3.6543	3.50348	3.68244	3.22088	3.30775	3.85242	3.57318
106493	-0.160423	0.827084	0.867893	-1.56734	0.0827513	0.239239	-0.292653	0.733241	0.83697	1.11427	0.125593	0.173403	-2.08675	-1.6527	-2.51889	-1.51133	-1.1154	-3.51243	-0.67114	-0.843904
106502	1.7941	0.00521456	0.0180235	0.862575	0.0889441	0.239239	0.494694	0.289907	0.482973	1.42622	0.0148992	0.0294382	-5.78719	-5.74017	-4.10385	-3.83326	-3.43733	-3.51243	-4.37158	-4.30334
106505	-0.449929	0.109878	0.177909	-0.91476	0.0165063	0.106101	-0.384923	0.241734	0.465602	0.0799083	0.727851	0.769839	4.01855	4.52779	3.68405	3.98052	3.33085	3.54285	4.17145	4.53902
106506	0.328647	0.0966267	0.161419	0.183539	0.339669	0.543754	0.552055	0.0269277	0.126738	0.697163	0.00332136	0.00994824	1.97436	2.09904	2.37188	2.35657	2.90252	2.93051	2.5942	2.87657
106511	-0.403471	0.0993795	0.165024	0.676176	0.0335522	0.157184	0.363711	0.193203	0.40574	-0.715937	0.0129715	0.0288373	3.31347	3.39683	2.63762	3.30629	3.22088	3.40643	2.5942	2.68535
106512	-0.158798	0.269492	0.357286	-0.0783039	0.630145	0.785367	-0.0736677	0.661082	0.787939	-0.154162	0.259724	0.322118	3.67429	3.50539	3.48861	3.36641	3.38285	3.33306	3.48017	3.39015
106515	-0.787494	0.00722004	0.0229748	0.464306	0.113515	0.277975	-0.182149	0.484649	0.654981	-1.43395	0.000412244	0.00217051	4.53361	4.15314	3.57563	3.53306	3.22088	3.52099	2.72645	3.09754
106517	-0.463299	0.594382	0.670246	0.0644103	0.95109	0.973367	-0.698829	0.505926	0.673004	-1.22654	0.196865	0.254747	-1.69973	-2.93281	-1.78192	-3.83326	-3.43733	-3.51243	-2.78662	-4.30334
106518	-0.760628	0.00435901	0.0180235	0.00786394	0.966396	0.980061	-0.155426	0.417953	0.606233	-0.923918	0.00165321	0.00582827	6.76427	6.35292	5.70189	5.89636	5.67901	5.6091	5.51564	5.75601
106522	-0.150628	0.355504	0.445724	-0.197711	0.253433	0.452638	-0.197992	0.257342	0.482973	-0.150909	0.349421	0.4138	5.40325	5.03215	5.06357	5.07062	4.88008	4.85825	5.15785	4.97511
106534	0.0696185	0.831077	0.870807	0.33256	0.372962	0.576119	0.368483	0.345704	0.538685	0.105541	0.733087	0.774621	3.75002	2.92161	3.44305	3.36641	3.92899	3.62712	3.38997	3.49756
106539	-0.559714	0.0056172	0.0190366	-0.38679	0.0313332	0.152464	-0.353913	0.0424184	0.16343	-0.526837	0.00762171	0.0189962	6.46458	6.44997	5.77113	6.02317	5.6738	5.41534	5.95373	5.90734
106540	0.315774	0.0383553	0.079192	0.201836	0.275799	0.47841	-0.787203	0.00235994	0.038962	-0.673265	0.00198916	0.0066843	3.18147	3.2285	3.58964	3.44287	2.79149	2.67739	2.57093	2.49108
106541	4.40267	4.80676e-05	0.00153807	-0.481622	0.122863	0.291773	1.08154	0.00918489	0.0738175	5.96583	6.68412e-06	0.000281914	-0.832998	0.526621	3.99944	4.51104	5.42376	5.22566	5.9447	5.66677
106547	-0.266355	0.160964	0.237398	-1.01817	0.00421032	0.0522939	-0.953268	0.00667756	0.0625615	-0.201452	0.244564	0.306243	3.20433	3.15768	2.99418	2.82495	2.23509	1.69702	3.07963	2.87657
106552	-0.491579	0.220545	0.305563	0.0305622	0.947113	0.971365	0.0270419	0.954712	0.974636	-0.4951	0.196174	0.25399	2.73244	3.46685	2.33909	2.90821	2.39556	2.86261	2.78829	2.41091
106558	0.0172369	0.895856	0.921719	0.404501	0.0184373	0.112567	0.2566	0.0911748	0.256122	-0.130664	0.336244	0.401663	5.05122	5.02719	4.91685	5.20291	5.32089	5.30532	4.9526	4.86408
106562	-0.582392	0.230406	0.316845	-0.48564	0.356634	0.559801	-0.401518	0.444535	0.629564	-0.49827	0.292449	0.356752	7.55558	8.40744	6.79021	8.00791	7.09112	6.89802	7.32495	7.63735
106563	1.7941	0.00521456	0.0180235	0.862575	0.0889441	0.239239	0.494694	0.289907	0.482973	1.42622	0.0148992	0.0294382	-5.78719	-5.74017	-4.10385	-3.83326	-3.43733	-3.51243	-4.37158	-4.30334
106574	0.262857	0.186991	0.267327	0.170691	0.404127	0.603411	0.365985	0.116999	0.298781	0.458151	0.0315806	0.0544118	3.4051	3.36574	3.41185	3.91493	3.94637	4.08002	3.92763	3.75736
106575	-0.746341	0.0156512	0.0406204	0.0971052	0.734054	0.857474	-0.325227	0.276394	0.482973	-1.16867	0.00194682	0.00657906	4.64012	4.66178	4.26684	3.49766	3.55135	3.60651	3.45497	3.51045
106578	1.81882	0.0759159	0.133294	1.64821	0.111689	0.274975	0.467343	0.603159	0.746894	0.637955	0.498933	0.559864	-5.78719	-4.1552	-2.51889	-3.83326	-1.85237	-3.51243	-4.37158	-4.30334
106580	3.42536	0.000206471	0.00295142	0.122421	0.787918	0.887869	0.519631	0.275446	0.482973	3.82257	0.000112646	0.000970652	2.49358	3.78536	6.17808	6.93906	6.99417	7.16793	6.99201	6.92488
106590	-0.075793	0.864807	0.89627	-0.19551	0.748814	0.86649	-1.13443	0.0898608	0.254408	-1.01471	0.0651312	0.099898	0.0456961	0.563616	-0.196959	0.690303	-1.1154	-0.705079	-1.20165	-0.215872
106594	-0.44679	0.0648431	0.118236	0.502368	0.0596178	0.217143	-0.160922	0.479437	0.652088	-1.11008	0.00145794	0.00531519	5.42652	5.07922	4.93232	4.67057	4.76724	4.52649	3.94583	4.34412
106595	-0.561803	0.377955	0.468411	-1.1988	0.0716559	0.239239	1.08419	0.155986	0.355789	1.72119	0.00846024	0.0206169	-1.14334	0.325924	-0.933924	-1.0259	0.0221008	0.188006	1.35634	1.25125
106596	0.99765	0.151844	0.227204	0.862575	0.221578	0.41907	0.494694	0.46355	0.640386	0.629769	0.341647	0.405721	-4.20223	-5.74017	-4.10385	-3.83326	-3.43733	-3.51243	-4.37158	-4.30334
106600	1.21031	0.00492351	0.0180235	-0.0984397	0.707803	0.838297	0.880416	0.0217599	0.113765	2.18917	9.36876e-05	0.000866864	0.0954492	-0.185576	0.850347	1.52429	2.11726	1.97942	2.16758	2.12293
106601	-1.44007	0.000652955	0.00556293	-0.647742	0.0390387	0.170384	-0.176911	0.497585	0.666799	-0.969237	0.00525194	0.0141219	7.13688	7.27089	5.5127	6.0138	5.75989	5.41534	5.98707	6.48048
106602	-1.73228	0.000612522	0.00537108	-1.78182	0.00821182	0.0736965	-2.22541	0.00277405	0.0413371	-2.17587	0.000185165	0.00131568	3.54148	3.92339	2.0459	1.9481	0.263109	-0.705079	1.35634	1.76275
106603	-1.07951	0.00123077	0.00821157	-0.256969	0.289847	0.493384	-0.413311	0.114923	0.295629	-1.23585	0.000533021	0.00257264	5.10231	5.57555	4.15825	4.37131	3.82006	3.87127	4.0078	4.20049
106608	-0.820877	0.0660354	0.119656	0.769651	0.179996	0.370101	-0.220883	0.659915	0.78736	-1.81141	0.00408312	0.0116343	4.03139	3.30149	3.24488	2.39556	2.79149	2.46485	1.81824	1.89437
106612	2.75534	0.000203461	0.00292944	-0.357376	0.206507	0.404011	0.941083	0.018766	0.104816	4.0538	1.13783e-05	0.000339527	-0.360929	0.702778	2.86193	2.98692	4.06252	3.66748	4.26867	4.16834
106618	-0.184332	0.488962	0.574539	-0.497649	0.152878	0.333045	-0.207442	0.543305	0.704649	0.105875	0.658067	0.707566	3.01047	2.83348	2.49606	3.01223	2.11726	2.93051	3.0293	3.02758
106622	0.219929	0.661211	0.729072	-1.43184	0.073626	0.239239	-1.26229	0.115275	0.29631	0.389471	0.412397	0.475729	3.70666	2.44471	3.57563	2.98692	2.23509	1.84512	3.59996	3.33329
106624	-0.731947	0.00458219	0.0180235	0.0789223	0.753565	0.867725	-0.499617	0.0768225	0.231847	-1.31049	0.000247268	0.00156572	2.58349	2.5313	1.96224	1.67136	1.20653	1.44176	1.24313	1.25125
106631	0.305175	0.054288	0.10309	1.09449	0.000187589	0.0126846	0.180307	0.221825	0.44121	-0.609005	0.0036728	0.0107211	4.54036	4.77455	5.04336	4.87755	5.18105	5.10595	4.1001	3.99587
106642	2.98763	0.0204853	0.0494064	0.863118	0.394897	0.5952	0.0998784	0.917436	0.953614	2.22439	0.0630989	0.0973941	-5.78719	-5.74017	-1.78192	-3.83326	-3.43733	-1.92747	-2.78662	-4.30334
106649	-0.253607	0.529862	0.612061	-0.342646	0.446638	0.642918	-0.00422025	0.992621	0.995456	0.0848186	0.822395	0.852759	-2.22648	-1.68705	-2.17785	-2.2483	-2.29983	-2.13392	-1.64911	-2.1017
106652	-0.769266	0.000329891	0.00379708	0.567727	0.00304793	0.0457612	-0.121623	0.342761	0.535867	-1.45862	8.99133e-06	0.000322532	5.43137	5.35325	4.69381	4.54612	4.47556	4.52649	3.91844	3.94933
106665	-0.109405	0.568671	0.647035	0.772766	0.00700008	0.067764	0.826126	0.00587895	0.059438	-0.0560444	0.759795	0.798812	9.87105	9.49607	9.37125	9.79621	10.3237	10.4781	9.61613	9.64202
106668	-0.81566	0.0482645	0.0942702	1.61679	0.00513292	0.0574235	0.192416	0.631726	0.766678	-2.24003	0.000459068	0.00232639	8.6516	8.07111	7.57431	7.52044	7.77151	7.70855	5.61852	6.62592
106670	-0.292312	0.338878	0.428525	0.0731593	0.812404	0.902705	-0.0473373	0.87936	0.930171	-0.412808	0.186662	0.243418	5.43318	4.77652	5.09337	4.51104	4.93336	4.60131	4.72382	4.65956
106673	1.00584	0.160929	0.237377	-0.722114	0.278698	0.481549	0.494694	0.478036	0.651053	2.22264	0.00837737	0.0204693	-5.78719	-4.1552	-4.10385	-3.83326	-3.43733	-3.51243	-2.78662	-2.71837
106678	0.909545	0.00364648	0.0166952	0.376864	0.11908	0.28633	0.0115831	0.957419	0.976147	0.544264	0.0335219	0.0570894	4.36382	3.98605	4.86482	5.31395	5.20291	4.99139	4.75512	4.68251
106685	0.20233	0.458064	0.545437	-0.628341	0.107097	0.268741	-0.676883	0.0936202	0.260539	0.153789	0.551758	0.610416	1.26809	1.22562	1.32242	1.59301	0.810597	0.735494	1.73694	1.05422
106702	0.367571	0.740299	0.797708	0.693463	0.53493	0.713505	1.14427	0.339442	0.532963	0.818381	0.447116	0.50938	-4.20223	-2.93281	-4.10385	-2.2483	-3.43733	-0.705079	-2.78662	-2.71837
106704	-2.45885	0.0345587	0.0730463	-1.45907	0.248823	0.44749	-0.698829	0.584555	0.733829	-1.69861	0.0824549	0.12185	-1.14334	0.526621	-1.78192	-3.83326	-3.43733	-3.51243	-2.04965	-1.98141
106706	-0.160251	0.368402	0.458333	0.254137	0.318175	0.522312	-0.563528	0.044384	0.167595	-0.977917	0.00133357	0.00500048	2.42713	2.24283	2.12497	2.23283	1.60706	1.61685	1.46131	1.25125
106712	0.35538	0.0458295	0.0905814	0.392646	0.0365642	0.164566	0.428152	0.0298159	0.13395	0.390885	0.028588	0.0500846	4.13613	3.83159	4.30129	4.38106	4.82476	4.71157	4.42608	4.32237
106714	-0.236309	0.558896	0.638432	-0.26691	0.54793	0.722103	0.367118	0.44588	0.630646	0.397719	0.292465	0.356752	-0.0592734	-0.248312	-0.40341	-0.373828	-0.629976	0.575029	0.151982	0.340521
106717	0.693305	0.00250441	0.0131512	-0.176338	0.328656	0.532488	-0.230769	0.223993	0.44397	0.638874	0.00310299	0.00945312	2.81643	2.87086	3.37997	3.71364	3.33085	3.28198	3.48017	3.48457
106722	-1.32884	0.00110498	0.00768423	-0.965487	0.0337825	0.157696	-1.61989	0.0032999	0.0447078	-1.98324	0.000151094	0.00116127	5.02739	4.73658	3.68405	3.40515	2.17738	1.69702	2.5942	3.21236
106723	-0.452513	0.0930215	0.156601	0.551301	0.0621479	0.221885	-0.0268374	0.914326	0.951575	-1.03065	0.00401048	0.0114794	5.51487	5.17795	5.18847	4.58037	4.74754	4.98342	4.35293	4.27787
106727	-0.0393098	0.95102	0.963737	-0.307979	0.686938	0.824525	-0.657748	0.40064	0.590277	-0.389079	0.549489	0.608414	-2.32776	-1.6527	-2.51889	-1.51133	-1.85237	-3.51243	-2.04965	-2.71837
106728	0.23434	0.799438	0.845651	-1.50797	0.153311	0.333562	-0.318293	0.760814	0.853649	1.42402	0.123518	0.170925	-4.20223	-2.57024	-2.51889	-3.83326	-3.43733	-3.51243	-2.78662	-1.13341
106737	-0.184414	0.611874	0.685437	0.690264	0.169341	0.355291	-0.0329861	0.940986	0.96624	-0.907664	0.0461106	0.0746071	3.59435	2.88554	3.314	2.76665	3.38285	2.67739	2.36989	2.29658
106744	1.42328	0.000576526	0.0051896	0.540532	0.0496276	0.195949	0.478723	0.0800861	0.236963	1.36148	0.000610941	0.00282025	1.59651	1.33665	2.63762	3.17797	3.35709	3.38238	2.90454	2.75195
106746	-0.436868	0.0276121	0.0618577	0.47309	0.0213602	0.122398	0.310107	0.0929041	0.259012	-0.599851	0.00684855	0.0174295	5.40818	5.13865	4.99155	4.67057	5.14387	5.14934	4.65909	4.68819
106750	3.87201	0.0194268	0.0475551	0.246766	0.858439	0.929468	-1.58096	0.246031	0.4715	2.04429	0.173126	0.228058	-4.20223	-5.74017	-0.0163865	-2.2483	-3.43733	-1.92747	-1.56422	-4.30334
106753	0.392279	0.63783	0.709321	0.608964	0.47428	0.664983	0.975537	0.284169	0.482973	0.758852	0.354858	0.418246	-4.20223	-3.41824	-4.10385	-2.69576	-1.85237	-3.02701	-2.30119	-3.81791
106760	-1.06039	0.0224954	0.0531062	-0.260545	0.503743	0.690703	0.827747	0.0613478	0.203719	0.027905	0.939868	0.951829	6.75027	6.6732	6.24156	5.05852	6.52412	6.43447	6.58043	6.8994
106768	1.7941	0.00521456	0.0180235	0.862575	0.0889441	0.239239	0.494694	0.289907	0.482973	1.42622	0.0148992	0.0294382	-5.78719	-5.74017	-4.10385	-3.83326	-3.43733	-3.51243	-4.37158	-4.30334
106770	1.36812	0.0333338	0.0713929	1.10312	0.0714766	0.239227	0.735242	0.195913	0.408958	1.00024	0.0926231	0.134055	-4.9392	-5.74017	-4.10385	-3.83326	-2.9519	-3.51243	-4.37158	-4.30334
106773	-0.476773	0.12567	0.196865	-1.60177	0.0087463	0.0757076	-1.64376	0.00850197	0.0713153	-0.51877	0.0874373	0.127946	3.24347	2.97751	2.71633	2.54178	0.263109	1.69702	2.61711	2.56703
106776	0.359448	0.566942	0.645523	-0.98229	0.223387	0.420905	-0.955654	0.245831	0.471365	0.386084	0.522564	0.582655	-0.577741	0.0927249	-0.0163865	0.254204	0.263109	-1.92747	0.486401	-0.215872
106780	1.50031	0.0147205	0.0387782	0.862575	0.105332	0.265745	0.494694	0.317083	0.511585	1.13243	0.0440901	0.0717796	-5.20223	-5.74017	-4.10385	-3.83326	-3.43733	-3.51243	-4.37158	-4.30334
106785	1.47498	0.18422	0.264317	0.0765939	0.944502	0.970426	-0.3387	0.759085	0.852667	1.05968	0.323022	0.387912	-4.20223	-3.41824	-0.933924	-3.83326	-3.43733	-1.92747	-2.78662	-2.71837
106792	-0.612409	0.00475238	0.0180235	0.0138453	0.937327	0.967425	-0.681438	0.00591094	0.059438	-1.30769	9.49345e-05	0.000874335	5.3285	5.22345	4.61383	4.71749	4.17	3.80045	3.87159	4.06735
106794	-0.0166372	0.905713	0.929233	0.316841	0.0536903	0.204287	0.705842	0.0021847	0.0377921	0.372364	0.0260188	0.0462664	4.52228	4.24852	4.38399	4.35162	5.15138	4.99932	4.75512	4.76006
106795	-0.183231	0.255887	0.342867	0.0330942	0.833413	0.915733	0.124845	0.449038	0.632961	-0.0914798	0.543902	0.603294	4.88788	4.88554	4.88767	4.50436	4.87101	4.78677	4.83543	4.75466
106808	-1.52736	0.0149332	0.0392001	0.172706	0.826194	0.911662	-1.29343	0.109411	0.28689	-2.99349	0.0014242	0.0052267	2.37771	2.94983	1.32242	0.921628	-0.267406	-0.0530023	-1.20165	0.554646
106809	-0.0334514	0.854404	0.887913	0.206048	0.278029	0.480946	0.489826	0.0320976	0.139671	0.250326	0.190927	0.248255	5.00152	4.72438	5.03826	4.60553	5.36033	5.27873	5.12228	5.10393
106816	-0.597644	0.042685	0.0859546	-0.471043	0.101371	0.259911	-0.000288087	0.999089	0.999525	-0.126889	0.611303	0.665437	6.83692	6.57555	6.47452	5.74982	6.096	6.12238	6.5103	6.65013
106820	-0.182993	0.239891	0.326853	0.364017	0.0428828	0.180596	0.799296	0.0019652	0.0354329	0.252286	0.0916817	0.132977	3.66608	3.46196	3.41185	3.34665	4.10956	4.24912	3.76285	3.87159
106822	2.98763	0.0100418	0.0291768	0.856164	0.264497	0.465635	1.25095	0.137134	0.33074	3.38241	0.00472846	0.0130013	-5.78719	-5.74017	-1.78192	-3.83326	-1.1154	-1.92747	-2.04965	-2.71837
106823	0.410826	0.041017	0.0834747	0.792558	0.00255593	0.0421197	0.431714	0.0365739	0.14981	0.0499816	0.764011	0.802608	4.74126	4.31647	4.91574	4.9644	5.3473	5.39446	4.64244	4.51365
106827	0.195428	0.809836	0.85437	-0.668882	0.452457	0.647545	0.213245	0.82683	0.897349	1.07755	0.149553	0.201084	0.441625	2.58626	1.67751	1.72133	2.05452	1.77297	2.61711	2.54215
106834	-0.100808	0.313355	0.403001	0.19189	0.104966	0.26527	0.087463	0.421892	0.60987	-0.205235	0.0640348	0.098482	7.58581	7.63827	7.45792	7.56495	7.62134	7.57569	7.4208	7.39233
106836	-0.349776	0.213171	0.296931	-0.27278	0.516183	0.700191	-1.21913	0.0174032	0.100138	-1.29613	0.00327057	0.00982572	2.49358	2.34198	1.96224	2.18911	1.31756	0.394457	1.40978	0.825948
106842	-0.639305	0.00142863	0.00896535	-0.206044	0.197404	0.39231	-0.37289	0.0409678	0.160063	-0.806151	0.000348762	0.00194162	4.42348	4.45582	3.78489	3.81779	3.55135	3.30775	3.64523	3.62148
106843	-0.457569	0.0326336	0.0701703	0.29512	0.173961	0.361868	0.0627338	0.757836	0.851763	-0.689955	0.0052759	0.0141704	4.38398	4.09746	3.84452	3.71364	3.9114	3.78219	3.40321	3.70229
106855	-0.752443	0.0206923	0.0497449	0.14163	0.5825	0.749781	0.332389	0.23151	0.453744	-0.561684	0.0545262	0.0861108	5.72998	5.32928	5.05854	4.47508	5.28035	4.94289	4.90222	5.03429
106858	-0.403848	0.00938957	0.027782	0.207114	0.101737	0.260306	0.550244	0.00201108	0.0358666	-0.0607177	0.596417	0.652445	5.81318	5.63759	5.29489	5.34914	5.8318	5.91173	5.67145	5.65811
106868	-0.555338	0.00703587	0.0225269	0.315383	0.128519	0.29968	-0.298675	0.138335	0.33236	-1.1694	0.000170678	0.00125599	4.18865	3.98946	3.47358	3.60137	3.35709	3.11692	2.90454	2.93507
106870	0.186079	0.421076	0.510291	0.477164	0.0830055	0.239239	0.53267	0.0675414	0.215612	0.241585	0.282343	0.346072	3.52342	3.44719	3.33078	4.05548	4.21372	4.19493	3.77308	3.67966
106871	-1.1097	0.00244578	0.0129401	-1.0145	0.0163117	0.105469	-1.00459	0.0189825	0.105403	-1.09978	0.0019282	0.00652907	4.07544	4.6008	3.314	3.13253	2.29059	2.15999	3.17531	3.304
106874	3.41361	0.000562977	0.00517297	-0.249449	0.532353	0.711552	0.71811	0.145192	0.341345	4.38116	8.52239e-05	0.000824896	-2.61727	-1.6527	0.803041	1.8106	1.95499	2.03168	2.46131	2.01859
106877	0.0819114	0.611552	0.685147	0.11609	0.471856	0.662609	0.437906	0.0276614	0.128563	0.403727	0.036912	0.0617493	5.01128	5.30286	5.25809	5.21931	5.73759	5.61685	5.70256	5.41947
106879	1.00584	0.160867	0.237314	0.862575	0.235555	0.432751	0.494694	0.477962	0.651028	0.637955	0.35106	0.414468	-5.78719	-4.1552	-4.10385	-3.83326	-3.43733	-3.51243	-4.37158	-4.30334
106882	2.91898	0.000361403	0.00396845	-0.169278	0.617447	0.776101	0.900964	0.0494696	0.178876	3.98922	3.28071e-05	0.000509214	-2.61727	-2.93281	-0.296494	0.626172	1.14763	0.946998	1.27228	1.1561
106884	0.0943378	0.848575	0.883744	-0.221385	0.651841	0.801794	0.63052	0.233273	0.455555	0.946242	0.0862195	0.126625	4.10307	5.44409	4.43143	5.33416	5.50811	5.49038	5.67418	5.76679
106885	-0.30794	0.627334	0.698951	0.870118	0.241207	0.439058	0.51559	0.470614	0.646827	-0.662467	0.313095	0.377943	-3.20223	-3.1552	-4.10385	-2.83326	-3.43733	-2.51243	-4.37158	-3.30334
106892	0.83698	0.00131304	0.00851446	0.772285	0.00250732	0.0418133	0.678726	0.00555667	0.0577837	0.743422	0.00201275	0.00674079	1.80526	1.82208	2.71633	2.57613	3.43303	3.22903	2.54728	2.56703
106893	1.7941	0.00521456	0.0180235	0.862575	0.0889441	0.239239	0.494694	0.289907	0.482973	1.42622	0.0148992	0.0294382	-5.78719	-5.74017	-4.10385	-3.83326	-3.43733	-3.51243	-4.37158	-4.30334
106896	-0.884698	0.269624	0.357344	2.87747	0.0683476	0.234155	-0.648889	0.549776	0.70873	-4.41105	0.00630724	0.0163595	2.84034	1.20235	0.940545	1.37619	0.810597	0.188006	-2.04965	-2.71837
106900	0.286875	0.0896848	0.152229	0.047983	0.780534	0.883244	-0.0791035	0.655122	0.784306	0.159789	0.290067	0.3544	3.50972	3.53828	3.96761	3.63435	3.6607	3.80045	3.62277	3.74651
106904	3.75616	0.0032757	0.0155249	-0.289116	0.741941	0.862335	-1.46736	0.117755	0.300197	2.57791	0.0212198	0.0391649	-5.78719	-5.74017	-1.78192	-2.2483	-3.43733	-3.51243	-4.37158	-1.98141
106909	-0.398427	0.588619	0.665104	0.0765939	0.915181	0.959979	1.2934	0.133543	0.324836	0.818381	0.244283	0.305924	-4.20223	-2.93281	-4.10385	-3.83326	-3.43733	-1.92747	-2.78662	-2.71837
106914	-0.287921	0.274836	0.36272	0.259513	0.375101	0.578151	0.410339	0.200993	0.415133	-0.137096	0.558929	0.616863	3.1465	2.96374	2.90738	2.60968	3.07046	3.28198	3.23575	2.59148
106918	0.679267	0.0015656	0.00952929	0.0346531	0.798775	0.893278	0.298941	0.0674417	0.215433	0.943556	0.000207356	0.00141429	3.87992	3.78144	4.39998	4.63027	4.76724	4.84951	4.84274	4.70509
106920	-1.71309	7.38445e-05	0.00180667	0.977819	0.0237767	0.129175	-1.05869	0.0089239	0.0730059	-3.74961	4.26099e-06	0.000249675	3.65782	3.69584	2.12497	1.78145	0.732594	1.07253	0.151982	-0.303335
106921	-1.28241	0.000352074	0.00394852	1.17079	0.00983809	0.0806326	-1.48355	0.00109555	0.0277775	-3.93675	4.18775e-06	0.000249675	5.25833	5.15188	4.17692	3.63711	2.48534	2.39446	1.35634	1.17758
106923	-0.92314	0.0012957	0.00846032	-0.0525604	0.784702	0.886112	-0.688861	0.0088476	0.0729577	-1.55944	7.44754e-05	0.000778272	6.35842	5.97965	5.394	5.09452	4.54566	4.56972	4.61426	4.60656
106925	0.907328	0.0155058	0.0403395	-0.0663321	0.839533	0.919066	-0.117063	0.729284	0.834586	0.856597	0.0166529	0.0321386	1.80526	1.71105	2.52551	2.82495	2.05452	3.02672	2.54728	2.68535
106932	-0.0712285	0.940227	0.955051	-0.539664	0.598475	0.761778	0.171273	0.872908	0.925971	0.639708	0.479445	0.540485	-2.97984	-2.57024	-4.10385	-1.51133	-3.43733	-1.92747	-1.56422	-2.71837
106942	-0.0157542	0.970362	0.977735	-0.313936	0.462277	0.655235	0.931544	0.0779754	0.233496	1.22973	0.0141819	0.0294382	-1.69973	-1.09631	-1.78192	-1.0259	-0.629976	-0.342509	-0.284117	-0.0554077
106945	0.954035	0.108631	0.176387	-0.444056	0.458061	0.651814	-0.566707	0.355985	0.548051	0.831384	0.14682	0.19777	-3.86119	-3.0177	-2.51889	-2.45475	-2.58933	-3.51243	-2.30119	-2.92482
106952	-0.186458	0.47674	0.562957	0.22693	0.411817	0.61091	0.583672	0.0792108	0.235789	0.170284	0.47409	0.535206	3.88346	3.40194	3.68405	3.20016	4.06252	4.01895	3.95485	3.66821
106955	0.625637	0.0917726	0.155006	0.00308073	0.992857	0.996512	0.267861	0.468565	0.645009	0.890417	0.0228184	0.0415437	3.04886	3.83915	3.79702	4.37131	4.27003	4.40046	4.43255	4.23194
106957	0.266785	0.149778	0.225754	0.276132	0.150802	0.33021	0.410104	0.0566719	0.193988	0.400757	0.040343	0.0666022	4.10914	3.83159	4.27553	4.19465	4.47556	4.814	4.42608	4.31505
106959	1.40547	0.184911	0.264894	-1.45907	0.165757	0.350668	-0.271304	0.794999	0.874987	2.59324	0.0233464	0.0423372	-5.78719	-3.41824	-4.10385	-2.2483	-3.43733	-3.51243	-2.04965	-1.98141
106963	1.09522	0.00164666	0.00985188	0.237603	0.318515	0.522647	-0.0755992	0.742068	0.843073	0.782015	0.00838391	0.0204727	3.81179	3.8048	4.67423	5.14688	4.67641	4.97541	4.77053	4.40747
106972	0.33465	0.0206582	0.049693	0.302718	0.0286594	0.14434	0.714116	0.000488472	0.0198079	0.746048	0.000370091	0.00202401	4.71564	4.87178	5.18386	5.07062	5.84576	5.83939	5.55175	5.52797
106990	-0.352981	0.115502	0.18453	0.131192	0.53465	0.713409	0.139459	0.51926	0.683791	-0.344714	0.115011	0.161048	5.09009	4.90098	4.91017	4.35162	4.77699	4.78677	4.59709	4.70509
106998	-0.0537663	0.743481	0.799981	0.272923	0.174595	0.362555	-0.0115006	0.950861	0.972313	-0.33819	0.0715045	0.108227	4.37394	4.02636	4.19536	4.09155	4.03027	4.23576	3.86204	3.86157
107004	1.7941	0.00521456	0.0180235	0.862575	0.0889441	0.239239	0.494694	0.289907	0.482973	1.42622	0.0148992	0.0294382	-5.78719	-5.74017	-4.10385	-3.83326	-3.43733	-3.51243	-4.37158	-4.30334
107005	1.7941	0.00521456	0.0180235	0.862575	0.0889441	0.239239	0.494694	0.289907	0.482973	1.42622	0.0148992	0.0294382	-5.78719	-5.74017	-4.10385	-3.83326	-3.43733	-3.51243	-4.37158	-4.30334
107007	-0.403977	0.189171	0.269522	-0.336315	0.36356	0.565512	-0.190229	0.614037	0.754019	-0.25789	0.346643	0.410796	2.57475	2.81058	1.91852	2.7059	1.92022	2.26893	2.25778	2.61553
107019	-0.49398	0.521117	0.604358	-0.110712	0.896411	0.952302	0.415477	0.654631	0.783937	0.0322095	0.961541	0.970158	-0.172484	1.57272	0.144078	0.254204	0.650132	0.575029	0.985972	0.451552
107026	0.792596	0.0894295	0.151989	0.679216	0.339694	0.543754	-1.41958	0.0444023	0.167595	-1.3062	0.0441592	0.0718685	1.17859	1.91089	2.00468	2.7059	0.46956	1.34555	0.672815	-0.215872
107027	1.97433	1.79055e-05	0.00103789	0.505152	0.0319803	0.154033	-0.21135	0.276247	0.482973	1.25783	0.000301773	0.00177875	1.94752	2.27664	3.95685	4.22744	3.89359	3.85389	3.41632	3.31872
107030	-0.698157	0.00329255	0.0155667	-0.102448	0.597725	0.761089	-0.464773	0.0443419	0.167489	-1.06048	0.000358674	0.00197743	4.51773	4.74063	4.07108	3.77407	3.52845	3.40643	3.52929	3.60955
107037	-0.117666	0.652391	0.721748	-0.443298	0.16464	0.348987	0.118061	0.711963	0.822221	0.443694	0.0871985	0.127721	3.1227	2.73962	2.55436	3.10926	2.71242	3.14578	3.33578	3.41776
107046	-0.294857	0.146476	0.221787	-1.03751	0.00241531	0.0413226	-0.224456	0.370274	0.561068	0.518199	0.0123622	0.0278145	2.46547	2.37358	2.236	1.99963	1.69195	2.10228	2.90454	2.97279
107047	-0.0797883	0.568703	0.647035	-0.0173006	0.922365	0.961095	-0.855011	0.00187657	0.0347268	-0.917499	0.000542284	0.00260261	4.52909	4.41592	4.35968	4.42884	3.38285	3.68724	3.66184	3.44486
107050	0.000528035	0.996204	0.997373	-0.355471	0.0160766	0.104743	-0.720735	0.000477271	0.0196438	-0.364736	0.0132233	0.0292407	6.21843	6.15957	6.16645	6.2125	5.55985	5.37935	5.82932	5.81949
107053	0.064423	0.862597	0.894477	-0.234715	0.498076	0.685131	1.13469	0.026643	0.126095	1.43383	0.00216599	0.00712406	0.167002	0.903691	0.568576	0.626172	1.84807	1.61685	2.12027	1.80519
107054	2.60709	0.0257231	0.0588069	0.861924	0.352223	0.556029	0.467343	0.604488	0.747612	2.21251	0.0467312	0.0754679	-5.78719	-5.74017	-2.51889	-3.83326	-1.85237	-3.51243	-4.37158	-2.71837
107056	0.71479	0.00569726	0.0192532	0.380099	0.0678567	0.233005	0.575869	0.0165007	0.0974801	0.910559	0.0014948	0.00540335	4.26402	3.88005	4.93232	4.63027	5.32089	5.40345	5.02716	4.93746
107057	-0.542994	0.0016402	0.00983793	-0.455618	0.00450507	0.0538803	0.508093	0.00244964	0.0393874	0.420716	0.00627226	0.0162903	6.34498	6.39586	5.89756	5.75733	6.29907	6.37174	6.81453	6.76746
107058	-0.0631849	0.917584	0.938087	-2.10145	0.0218575	0.123704	-1.08049	0.193681	0.406288	0.957773	0.11374	0.159492	-1.03231	-0.454763	-1.29649	-0.289763	-1.85237	-1.92747	-0.464689	0.906118
107059	0.704868	0.322954	0.413231	-1.14183	0.141487	0.316668	0.214362	0.777119	0.864475	2.06106	0.0136475	0.0294382	2.50282	4.40831	3.70993	4.65458	4.27003	4.47056	5.35464	5.67251
107060	0.664194	0.00174963	0.0102875	0.0917285	0.526469	0.707889	0.260191	0.11849	0.3013	0.832657	0.000358171	0.00197647	2.92361	3.09589	3.7227	3.61795	3.9114	3.95517	3.80335	3.88154
107061	-0.124935	0.265314	0.353001	0.222644	0.0815788	0.239239	0.155551	0.194905	0.407494	-0.192027	0.107739	0.152421	6.89865	6.80986	6.77036	6.68932	6.93717	6.83297	6.62065	6.70439
107062	1.7941	0.00521456	0.0180235	0.862575	0.0889441	0.239239	0.494694	0.289907	0.482973	1.42622	0.0148992	0.0294382	-5.78719	-5.74017	-4.10385	-3.83326	-3.43733	-3.51243	-4.37158	-4.30334
107063	1.7941	0.00521456	0.0180235	0.862575	0.0889441	0.239239	0.494694	0.289907	0.482973	1.42622	0.0148992	0.0294382	-5.78719	-5.74017	-4.10385	-3.83326	-3.43733	-3.51243	-4.37158	-4.30334
107081	1.80328	0.0137063	0.0368714	1.6584	0.0320171	0.154033	-0.159028	0.781929	0.867631	-0.0141465	0.981342	0.985126	-1.69973	-2.57024	-0.0163865	-0.663334	-0.267406	-0.705079	-2.78662	-1.49598
107084	1.7941	0.00521456	0.0180235	0.862575	0.0889441	0.239239	0.494694	0.289907	0.482973	1.42622	0.0148992	0.0294382	-5.78719	-5.74017	-4.10385	-3.83326	-3.43733	-3.51243	-4.37158	-4.30334
107090	1.98147	0.0421185	0.085078	-3.59173	0.00227619	0.0403095	-0.903979	0.321398	0.515758	4.66922	0.000307914	0.00179623	-2.61727	-4.1552	-1.29649	-1.51133	-3.43733	-1.19051	1.38331	1.18852
107093	0.644566	0.0165615	0.0422422	-0.595478	0.0701144	0.237251	-1.08581	0.00638629	0.0616223	0.15423	0.473996	0.535151	0.954273	1.15465	1.62407	1.78145	0.650132	0.575029	1.35634	1.05422
107097	1.7941	0.00521456	0.0180235	0.862575	0.0889441	0.239239	0.494694	0.289907	0.482973	1.42622	0.0148992	0.0294382	-5.78719	-5.74017	-4.10385	-3.83326	-3.43733	-3.51243	-4.37158	-4.30334
107098	-0.977229	0.0442544	0.0882427	0.0694903	0.877308	0.941212	-0.0584989	0.896465	0.940765	-1.10522	0.0284655	0.0499286	7.74065	7.96967	6.15	7.5998	6.86531	6.77181	6.69384	6.80454
107105	-0.52769	0.215146	0.299299	0.862575	0.089025	0.239239	0.494694	0.290048	0.482973	-0.895571	0.0564832	0.0887083	-3.46527	-3.41824	-4.10385	-3.83326	-3.43733	-3.51243	-4.37158	-4.30334
107108	-0.491488	0.117673	0.187197	0.381209	0.223429	0.420905	0.449769	0.172852	0.380026	-0.422928	0.152818	0.204787	4.78551	4.44719	3.7227	4.57188	4.61252	4.53741	4.14017	4.24741
107109	-0.00309313	0.984519	0.988043	-1.15183	0.000629636	0.0219106	-0.372064	0.109725	0.287399	0.776676	0.000855182	0.00360815	2.75584	2.54985	2.71633	2.57613	2.23509	2.32046	3.42932	3.43137
107112	0.0648007	0.533403	0.61508	-0.0924463	0.402377	0.601591	-0.254698	0.0464079	0.172026	-0.0974514	0.358773	0.422278	6.89777	6.82041	6.97363	6.87496	6.64082	6.69824	6.78892	6.7349
107136	2.43511	0.047422	0.0928829	2.03313	0.0974681	0.25361	0.235974	0.814651	0.888332	0.637955	0.568963	0.626489	-5.78719	-4.1552	-1.78192	-3.34783	-3.43733	-1.19051	-4.37158	-4.30334
107141	-0.748067	0.00885192	0.0267349	-1.17785	0.00326752	0.0469893	-0.587507	0.0750326	0.228875	-0.157725	0.390637	0.454727	1.72851	1.80673	1.1056	0.921628	0.46956	0.394457	1.73694	1.47802
107142	3.54708	1.74118e-06	0.000497321	0.885202	0.00227075	0.0402799	0.155504	0.406139	0.594879	2.81738	7.39562e-06	0.000290375	1.83486	1.6861	5.0835	5.53961	5.44837	5.47909	4.68099	4.47474
107145	0.0526716	0.70955	0.771048	0.0285697	0.837859	0.918168	0.830875	0.000715003	0.0237723	0.854977	0.00067578	0.00303174	5.21913	5.41529	5.49048	5.24623	6.16072	6.24078	6.11123	6.23291
107146	-0.418036	0.235801	0.322544	0.816458	0.179328	0.369044	-1.31918	0.0298377	0.133989	-2.55367	0.000763828	0.00332133	1.66402	2.02139	1.1056	1.78145	0.263109	-0.0530023	-1.20165	-0.215872
107147	1.00584	0.160867	0.237314	0.862575	0.235555	0.432751	0.494694	0.477962	0.651028	0.637955	0.35106	0.414468	-5.78719	-4.1552	-4.10385	-3.83326	-3.43733	-3.51243	-4.37158	-4.30334
107150	0.234629	0.223513	0.309101	-0.143472	0.444259	0.640962	0.172563	0.360362	0.551847	0.550664	0.018929	0.0356704	6.12232	6.35754	6.24156	6.70299	6.66727	6.62584	6.81268	6.76746
107155	0.112061	0.551758	0.632033	0.0519804	0.805478	0.897851	0.227937	0.325234	0.519748	0.288017	0.129625	0.178126	2.62643	2.65644	2.74164	2.76665	2.90252	3.05742	3.14412	2.70789
107156	4.26798	6.86059e-05	0.00174506	1.44618	0.00490252	0.056104	1.29239	0.00915723	0.0738175	4.1142	7.87458e-05	0.000795186	-3.46527	-4.1552	0.144078	0.810597	1.51687	1.97942	0.272277	0.340521
107163	3.70222	0.0013717	0.0087042	1.66128	0.0736218	0.239239	-1.40298	0.0802575	0.237276	0.637955	0.439111	0.501841	-5.78719	-4.1552	-1.29649	-1.2483	-3.43733	-1.92747	-4.37158	-4.30334
107171	1.54001	0.00185012	0.0106784	-0.646576	0.115761	0.281352	-1.07769	0.0211892	0.112017	1.1089	0.0094929	0.0225982	-0.651331	-0.594488	0.576475	1.30014	-0.101047	-0.219652	0.446044	0.526514
107173	0.264965	0.349381	0.439155	-0.423647	0.225742	0.423206	-0.235983	0.501341	0.669304	0.452629	0.108782	0.153641	1.90629	1.41971	1.96224	1.89466	1.69195	1.69702	2.34267	1.88649
107174	0.63325	0.0022191	0.0121334	0.131888	0.332668	0.536295	0.209589	0.145088	0.341277	0.710951	0.00120934	0.00464584	4.87458	4.84386	5.61896	5.36396	5.64215	5.76136	5.62136	5.51908
107176	-0.20174	0.404658	0.494573	0.527402	0.106208	0.267254	0.151955	0.605134	0.747865	-0.577187	0.0418751	0.06877	2.44643	2.66923	2.58265	2.09748	2.29059	2.71638	1.85724	2.10606
107181	1.61688	0.22223	0.307647	0.167514	0.872854	0.938509	1.69415	0.181691	0.391175	3.14352	0.0259402	0.0461847	-3.20223	-5.74017	-4.10385	-1.51133	-1.1154	-1.19051	-0.67114	-1.98141
107183	-0.484572	0.105139	0.172122	-0.038606	0.893339	0.950493	0.550744	0.102271	0.275617	0.104778	0.681076	0.728368	8.1026	7.81616	7.89791	7.04862	7.95552	8.09721	7.99173	8.13987
107187	-0.442257	0.258425	0.34557	-0.509594	0.298019	0.501643	-0.273058	0.583144	0.732984	-0.205722	0.547928	0.606967	2.31609	2.97977	1.87343	2.57613	1.69195	2.15999	2.29233	2.59148
107199	0.168799	0.287452	0.376456	-0.0524436	0.764058	0.874549	-0.0882344	0.626152	0.762472	0.133008	0.374641	0.43849	3.49589	3.76961	3.87914	3.71364	3.6607	3.76369	3.75254	3.77881
107204	2.64019	0.000701599	0.00580503	-0.953859	0.0653871	0.228072	-0.459797	0.321211	0.515565	3.13425	0.000271678	0.00166579	1.98759	3.44223	5.23823	5.46366	4.84344	4.93465	5.71721	5.96929
107205	2.91623	0.0585543	0.109204	-0.0679449	0.952325	0.973865	0.763689	0.536025	0.698904	3.74787	0.0191525	0.036012	-5.78719	-5.74017	-4.10385	-1.51133	-0.629976	-3.51243	-2.04965	-1.98141
107212	0.459034	0.0170542	0.0431086	0.0767127	0.591797	0.756806	0.896991	0.000917625	0.0258298	1.27931	4.26191e-05	0.00058011	3.04253	3.30696	3.60351	3.66659	4.56829	4.49319	4.41958	4.48783
107222	3.73218	0.000252195	0.00330036	-0.722114	0.202479	0.398613	-1.44338	0.0263881	0.125636	3.01091	0.000909815	0.00375893	-5.78719	-5.74017	-2.51889	-1.51133	-3.43733	-3.51243	-2.78662	-2.71837
107223	-0.934282	0.0455796	0.0901784	-0.47523	0.276764	0.479654	-0.181621	0.661204	0.787939	-0.640672	0.139391	0.189173	7.31133	6.65991	6.55704	5.55691	6.08034	5.66499	6.18205	6.51205
107224	-0.718343	0.541272	0.62247	-1.50803	0.245079	0.443562	0.133992	0.920916	0.955336	0.923673	0.375044	0.438832	-2.08675	-1.34785	-4.10385	-0.663334	-3.43733	-1.19051	-0.464689	-1.13341
107229	-0.348197	0.0815456	0.141083	0.199835	0.271047	0.472638	0.473972	0.029553	0.133111	-0.0740591	0.668113	0.716303	5.14871	5.5676	5.10316	4.91157	5.40502	5.56171	5.28842	5.27975
107231	1.7941	0.00521456	0.0180235	0.862575	0.0889441	0.239239	0.494694	0.289907	0.482973	1.42622	0.0148992	0.0294382	-5.78719	-5.74017	-4.10385	-3.83326	-3.43733	-3.51243	-4.37158	-4.30334
107234	2.96582	0.000293866	0.00355739	-1.01735	0.0513826	0.199708	-1.26217	0.02399	0.119143	2.721	0.00045867	0.00232569	-4.20223	-4.1552	-0.933924	-1.51133	-2.43733	-2.51243	-1.20165	-1.71837
107235	3.99018	1.4351e-05	0.000969479	1.14142	0.00164954	0.034362	1.12482	0.00220524	0.0378442	3.97358	1.30957e-05	0.000355219	-1.69973	-0.985278	2.43531	2.88099	3.68161	3.85389	2.63965	2.61553
107245	3.45897	2.5278e-05	0.00115483	4.1775	3.40179e-05	0.00624674	0.675728	0.0310064	0.136771	-0.0428003	0.92478	0.94038	0.98099	0.142478	3.92406	4.13828	4.55702	4.84071	0.151982	0.906118
107249	-1.1402	0.0896132	0.152151	0.125562	0.833652	0.915912	1.31333	0.079797	0.236577	0.0475621	0.928176	0.942788	-2.08675	-2.03973	-4.10385	-2.2483	-1.85237	-1.92747	-2.04965	-1.98141
107252	1.18359	0.0104097	0.0300338	0.247586	0.475659	0.666291	0.503018	0.196232	0.409173	1.43902	0.00295136	0.00907456	1.10762	1.66923	2.19993	2.98692	2.93771	3.20181	2.95934	2.68535
107254	1.7941	0.00521456	0.0180235	0.862575	0.0889441	0.239239	0.494694	0.289907	0.482973	1.42622	0.0148992	0.0294382	-5.78719	-5.74017	-4.10385	-3.83326	-3.43733	-3.51243	-4.37158	-4.30334
107257	-0.312368	0.268705	0.356521	-0.30683	0.34208	0.546643	-0.0501233	0.879037	0.929993	-0.0556611	0.820161	0.850959	3.61155	3.61519	3.7227	2.82495	3.19203	3.30775	3.66734	3.44486
107263	1.7941	0.00521456	0.0180235	0.862575	0.0889441	0.239239	0.494694	0.289907	0.482973	1.42622	0.0148992	0.0294382	-5.78719	-5.74017	-4.10385	-3.83326	-3.43733	-3.51243	-4.37158	-4.30334
107267	1.9705	0.101799	0.168014	0.693427	0.540525	0.717814	-0.00776539	0.994316	0.99657	1.2693	0.270846	0.333762	-2.32776	-4.1552	-2.51889	0.0736314	-1.85237	-0.705079	-1.63606	-2.30334
107269	0.0583026	0.725909	0.78511	-0.152195	0.374698	0.577754	0.198238	0.261618	0.482973	0.408736	0.0400211	0.0661623	5.09009	5.18093	5.06357	5.32913	5.42995	5.35484	5.71456	5.37438
107271	0.488946	0.203125	0.285773	0.399846	0.28435	0.487995	0.373104	0.317461	0.511849	0.462204	0.223341	0.283565	5.35683	4.27804	5.50533	5.10043	5.60979	5.74731	5.2376	5.32055
107274	1.62787	0.0654388	0.118904	-0.44728	0.518586	0.701542	0.636445	0.415139	0.603839	2.7116	0.005644	0.0149638	-1.69973	-2.57024	-0.0163865	-1.0259	-0.629976	0.879883	1.05469	0.0889822
107276	1.55317	0.0506306	0.0975665	1.9296	0.0332764	0.156668	0.392686	0.56992	0.724371	0.0162553	0.982049	0.985352	-1.8803	-2.93281	-1.29649	-0.373828	-1.1154	0.188006	-2.78662	-1.98141
107283	0.197274	0.307809	0.397448	0.305309	0.182039	0.372695	0.287455	0.219378	0.438242	0.179419	0.327725	0.392626	2.58349	2.39426	2.54001	2.85324	2.92022	3.02672	2.54728	2.7947
107284	0.847446	0.00460303	0.0180235	0.21583	0.324014	0.528049	0.4849	0.0634963	0.207598	1.11652	0.000751414	0.0032841	2.24071	2.42474	2.92957	3.46136	3.68161	3.64744	3.50494	3.39015
107289	0.302899	0.0867711	0.148355	-0.593505	0.0143828	0.0992333	-0.47433	0.0391991	0.156512	0.422074	0.0238262	0.0430828	3.63277	3.89101	3.9783	4.16109	3.63948	3.54285	4.09194	4.27787
107290	2.20547	7.31611e-05	0.00180588	-0.0113435	0.965132	0.979493	-0.350182	0.208625	0.424895	1.86663	0.000189601	0.00133752	1.22403	1.31512	3.20903	3.77407	3.16258	3.08748	3.29376	2.97279
107299	0.019516	0.968479	0.976473	0.862886	0.166895	0.351929	0.00145082	0.997926	0.998847	-0.841919	0.135751	0.18502	-2.97984	-3.00464	-3.10385	-2.83326	-3.43733	-2.51243	-3.37158	-4.30334
107300	-0.644371	0.191329	0.272032	0.534617	0.351435	0.555373	0.275807	0.623475	0.760546	-0.903181	0.0818466	0.121116	0.292611	0.117816	-0.448498	-0.427267	-0.401707	0.0725286	-1.41925	0.0372271
107302	-0.857046	0.0694716	0.12432	0.582147	0.255724	0.455638	0.50339	0.327287	0.52188	-0.935802	0.0479995	0.0772057	0.389528	0.278647	-0.196959	-0.869785	-0.0367929	-0.00147201	-1.14816	-0.0448163
107304	-1.13002	0.00951529	0.0280362	0.479243	0.231767	0.430162	0.583224	0.166541	0.370604	-1.02604	0.0120296	0.0271943	0.465282	0.376699	-0.331964	-1.11079	-0.251464	-0.00147201	-0.543761	-0.666421
107310	0.66159	0.0024623	0.0129815	-0.354391	0.0372111	0.166209	0.124889	0.382219	0.572852	1.14087	0.000133352	0.00107717	5.54987	5.7033	6.393	6.18494	6.34567	6.4805	6.85724	6.67752
107311	1.01718	0.042053	0.0849889	-1.96728	0.00388838	0.0500391	-1.10229	0.0593481	0.199768	1.88217	0.00154402	0.00553601	-1.26363	-0.382613	-0.0163865	0.414668	-0.629976	-1.19051	1.05469	1.05422
107312	-0.399196	0.508649	0.592787	-0.905311	0.200562	0.396015	0.0365387	0.959176	0.976854	0.542654	0.321035	0.385889	-0.360929	-0.248312	-0.40341	-1.0259	-0.629976	-0.705079	1.05469	-0.602895
107313	-0.0340107	0.83535	0.87385	0.584713	0.0110718	0.0859736	0.129201	0.455593	0.637938	-0.489523	0.0202848	0.0376581	5.14723	4.78242	4.94872	4.91157	5.05852	5.06121	4.59709	4.3513
107315	-0.109799	0.573885	0.651812	0.205474	0.354807	0.558116	0.447309	0.0859835	0.24742	0.132036	0.462652	0.524377	2.78645	2.54985	2.63762	2.47052	3.19203	2.82742	2.74736	2.85654
107318	2.60996	0.00430873	0.0180235	0.908899	0.203367	0.3999	-0.529101	0.411818	0.600838	1.17196	0.111511	0.15705	-3.78719	-4.74017	-1.78192	-1.51133	-2.43733	-1.92747	-2.37158	-3.81791
107320	-0.28936	0.0459376	0.0907701	0.204668	0.130218	0.302268	0.0953166	0.445365	0.630291	-0.398712	0.0134589	0.0294382	6.15422	6.3888	5.93644	6.02628	6.06451	6.08934	5.88934	5.85527
107323	-0.0810054	0.572492	0.650477	0.484459	0.0117337	0.0887763	0.368369	0.0367608	0.150369	-0.197095	0.19102	0.248313	5.03538	4.88828	4.94327	4.8142	5.29399	5.20524	4.89755	4.63036
107326	-0.387244	0.12011	0.190188	0.39283	0.207139	0.404848	-0.0603738	0.834047	0.902064	-0.840448	0.00799248	0.0197308	2.64326	2.26546	2.08598	2.04938	2.17738	1.84512	1.65079	1.57931
107330	0.410556	0.166822	0.244377	-0.18065	0.53495	0.713505	0.388579	0.242391	0.466341	0.979784	0.00526444	0.014146	2.94413	2.40449	2.92957	3.26477	3.27691	3.66748	3.77308	3.53587
107332	3.52303	0.000285919	0.00350023	-0.644643	0.109515	0.272384	0.302696	0.464034	0.640761	4.47037	4.77636e-05	0.000619681	-1.69973	-0.454763	2.12497	2.7961	2.93771	2.55366	3.54131	3.22805
107345	0.794275	0.0447351	0.0888597	-0.111377	0.779985	0.883041	-0.36272	0.38341	0.574003	0.542932	0.129182	0.177579	0.498208	0.599685	1.66856	0.974096	0.884597	1.07253	0.757703	1.43543
107351	0.0904301	0.92123	0.940858	0.0644103	0.950748	0.973367	-0.318293	0.761052	0.853799	-0.292273	0.750283	0.790622	-4.20223	-2.28073	-2.51889	-3.83326	-3.43733	-3.51243	-2.78662	-4.30334
107352	3.11538	0.000319682	0.00372629	-0.573753	0.142616	0.318409	0.904246	0.0571674	0.195013	4.59337	1.90703e-05	0.00040777	-4.20223	-4.1552	-0.644418	-1.51133	-0.267406	-0.0530023	0.486401	0.340521
107356	3.75616	7.57211e-05	0.00183445	-0.722114	0.133446	0.3069	-1.46736	0.0110129	0.0802991	3.01091	0.00030159	0.00177875	-5.78719	-5.74017	-1.78192	-2.2483	-3.43733	-3.51243	-2.78662	-2.71837
107357	-0.0831868	0.509965	0.593906	0.539845	0.00358421	0.0486703	0.0990756	0.434459	0.620592	-0.523956	0.00422522	0.0119281	5.77553	5.64947	5.54181	5.71749	5.65807	5.79818	5.21901	5.15814
107358	0.0170443	0.934475	0.951211	0.416644	0.0943942	0.248772	0.0599012	0.78589	0.869917	-0.339699	0.137136	0.186493	5.0129	4.44347	4.69381	4.79974	4.87101	4.74023	4.4454	4.32966
107362	1.7941	0.00522463	0.0180235	-0.722114	0.116957	0.283108	0.494694	0.290083	0.482973	3.01091	0.000223015	0.00147638	-5.78719	-5.74017	-4.10385	-3.83326	-3.43733	-3.51243	-2.78662	-2.71837
107371	-0.0380613	0.957805	0.968926	2.81901	0.0252488	0.13436	-0.329918	0.69937	0.814567	-3.18699	0.00939041	0.0223854	-0.657911	-1.6527	-0.196959	-2.2483	-1.85237	-1.19051	-4.37158	-4.30334
107373	2.27524	0.00297103	0.0146602	-0.105392	0.824	0.910251	0.0592764	0.90505	0.946059	2.43991	0.00162663	0.00576296	-1.46527	-0.0677398	1.2537	1.78145	1.73259	1.39446	1.51106	1.82595
107374	1.7941	0.00522136	0.0180235	1.86226	0.00348047	0.0483085	1.49438	0.00979092	0.0759974	1.42622	0.0149163	0.0294478	-5.78719	-5.74017	-4.10385	-3.83326	-2.43733	-2.51243	-4.37158	-4.30334
107378	0.83591	0.0117934	0.03292	0.581423	0.0835861	0.239239	0.00627345	0.982543	0.99051	0.26076	0.325298	0.390148	2.50743	2.19647	2.88484	3.53306	3.27691	3.11692	2.52324	2.70789
107379	1.7941	0.00521456	0.0180235	0.862575	0.0889441	0.239239	0.494694	0.289907	0.482973	1.42622	0.0148992	0.0294382	-5.78719	-5.74017	-4.10385	-3.83326	-3.43733	-3.51243	-4.37158	-4.30334
107382	-0.831417	0.056193	0.105859	-0.0460311	0.905396	0.956248	0.0934218	0.816197	0.889124	-0.691964	0.0865371	0.126924	5.5398	4.91715	4.84744	3.90145	4.48748	4.49319	4.33232	4.74379
107386	-2.15836	0.074093	0.130844	-1.73639	0.224501	0.422342	-0.663225	0.647834	0.778785	-1.0852	0.256547	0.318974	0.278895	1.62616	-0.933924	-1.51133	-3.43733	-0.342509	-0.912148	0.650861
107387	0.0224708	0.962728	0.972429	0.839954	0.225561	0.423206	-0.78448	0.224555	0.444418	-1.60196	0.0200749	0.0373347	0.382731	-0.695771	-0.0163865	-0.248297	-0.629976	-1.19051	-1.78662	-1.71837
107391	2.29894	0.00460851	0.0180235	-0.199768	0.688492	0.825747	0.246027	0.649686	0.780224	2.74473	0.00127886	0.00483665	-1.53927	-1.2166	1.51086	0.254204	1.08623	1.24245	1.73694	0.982067
107393	-0.369178	0.186704	0.266982	0.0121689	0.96303	0.978227	-0.224718	0.406096	0.594879	-0.606065	0.049613	0.0792958	6.25822	6.07081	6.1804	5.41229	5.65278	5.49038	5.50953	5.60806
107398	1.7793	0.0147364	0.0387943	0.862575	0.165077	0.349602	0.142236	0.800627	0.878739	1.05896	0.0959544	0.138173	-5.05601	-5.74017	-4.10385	-3.10208	-3.43733	-3.51243	-4.37158	-4.30334
107403	0.518007	0.141249	0.215347	-1.34758	0.00508909	0.0572511	-0.171861	0.603994	0.747462	1.69372	0.00143669	0.00526346	4.47608	5.24354	5.67258	5.07663	5.38604	5.0306	6.55249	6.55542
107405	0.82031	0.0341826	0.0725469	0.354299	0.384948	0.586943	-0.299365	0.447083	0.631486	0.166646	0.615126	0.668745	1.03299	1.0013	1.94054	1.72133	0.954987	2.10228	1.24313	1.12293
107407	-0.553405	0.0282808	0.062755	-0.360372	0.228499	0.426288	-0.660421	0.0497562	0.179371	-0.853454	0.00407392	0.0116192	3.15239	2.81826	2.46601	2.39556	1.77212	1.77297	2.00346	2.26652
107410	1.81882	0.0419232	0.084784	0.862575	0.302768	0.506495	-0.318293	0.681407	0.802731	0.637955	0.420502	0.48363	-5.78719	-4.1552	-2.51889	-3.83326	-3.43733	-3.51243	-4.37158	-4.30334
107411	1.7941	0.00521456	0.0180235	0.862575	0.0889441	0.239239	0.494694	0.289907	0.482973	1.42622	0.0148992	0.0294382	-5.78719	-5.74017	-4.10385	-3.83326	-3.43733	-3.51243	-4.37158	-4.30334
107412	1.7941	0.00521456	0.0180235	0.862575	0.0889441	0.239239	0.494694	0.289907	0.482973	1.42622	0.0148992	0.0294382	-5.78719	-5.74017	-4.10385	-3.83326	-3.43733	-3.51243	-4.37158	-4.30334
107413	-0.438385	0.0426047	0.0858278	0.831486	0.0098494	0.0806326	-0.391923	0.106871	0.282716	-1.66179	0.000119592	0.00100524	4.48777	4.4385	4.22258	3.80337	3.68161	3.5856	2.61711	2.99129
107423	0.481883	0.520628	0.603877	-0.86569	0.26192	0.462947	0.350904	0.665678	0.791703	1.69848	0.0343727	0.058236	-1.69973	-1.2166	-0.933924	-1.0259	-1.85237	0.575029	0.383308	0.0889822
107424	1.07075	0.00746633	0.02357	-0.254448	0.448971	0.644792	-0.274743	0.428972	0.616076	1.05046	0.00666053	0.0170528	0.954273	1.67769	2.30554	2.47052	2.05452	2.15999	2.34267	2.38317
107426	1.09425	0.00515376	0.0180235	-0.353528	0.285517	0.489083	-0.39805	0.245989	0.4715	1.04973	0.00521621	0.0140575	1.66402	1.77553	2.63762	3.01223	2.86645	1.97942	2.82809	2.70789
107439	-0.0902091	0.471757	0.558067	-0.042006	0.760161	0.871928	0.19163	0.216663	0.435149	0.143427	0.232427	0.293416	3.50972	3.44719	3.44305	3.32661	3.59609	3.56438	3.63404	3.60955
107442	0.997431	0.0462621	0.0911588	0.000246465	0.999466	0.999776	1.04466	0.0428664	0.163939	2.04184	0.000908254	0.00375378	-0.429642	0.0411946	0.288468	1.37619	1.92022	1.77297	1.69451	2.00045
107446	-0.088492	0.557701	0.637372	-0.784319	0.00145484	0.0316529	0.181922	0.246079	0.4715	0.877749	0.000827442	0.00352005	5.5521	5.90684	5.60523	5.67652	5.78908	5.85607	6.54505	6.66893
107449	0.0591611	0.817713	0.860386	-0.0146303	0.960294	0.977159	0.186765	0.55423	0.712171	0.260556	0.291082	0.35536	1.79023	1.69446	1.87343	1.72133	2.29059	1.69702	1.77817	2.23582
107450	2.33894	1.64932e-06	0.000497321	0.333227	0.0302323	0.149132	0.717703	0.0010735	0.0275556	2.72341	5.03497e-07	0.000169299	2.08932	2.07362	4.52915	4.30117	5.09794	5.17756	4.85483	4.75466
107451	-0.239402	0.205883	0.288701	0.266726	0.176313	0.364643	0.559476	0.0227413	0.116139	0.0533477	0.746048	0.786872	4.00234	4.24425	3.83279	3.94153	4.47556	4.41238	3.99911	4.35844
107455	-0.722557	0.366739	0.456692	0.862575	0.342611	0.547077	0.494694	0.575727	0.728338	-1.09044	0.191692	0.249051	-4.20223	-2.28073	-4.10385	-3.83326	-3.43733	-3.51243	-4.37158	-4.30334
107462	2.00048	0.0008261	0.00643034	0.161403	0.601606	0.764318	0.654174	0.0830733	0.242131	2.49326	0.000165927	0.0012355	1.39272	2.14858	3.42753	4.14973	4.32422	4.51547	4.33232	4.18611
107467	-0.533184	0.397083	0.48711	-0.963557	0.302	0.505636	-1.37847	0.155346	0.355043	-0.948096	0.159039	0.212099	3.36001	5.01889	3.34736	4.00594	2.23509	2.32046	3.34952	3.13129
107469	-0.714976	0.00290025	0.0144771	-0.0629403	0.692972	0.82854	0.0981376	0.547065	0.707144	-0.553898	0.00913623	0.0219196	5.71713	5.85182	5.10316	5.03402	5.3075	5.0306	5.09399	5.36732
107470	0.570466	0.0120285	0.03342	0.0449901	0.789059	0.88851	0.0474215	0.777116	0.864475	0.572897	0.0120222	0.0271826	5.32459	5.29807	5.90878	5.85499	6.14575	5.71398	5.96493	5.80388
107478	0.0948987	0.445953	0.533356	0.274706	0.0558859	0.209042	0.190648	0.15559	0.355115	0.0108406	0.928321	0.942856	5.19223	4.96547	5.18847	5.15826	5.32754	5.40046	5.11827	5.0608
107480	0.458402	0.00788898	0.0244526	0.261966	0.0976474	0.253871	-0.0640345	0.651536	0.781667	0.132402	0.306018	0.370826	3.87992	3.8048	4.30978	4.29086	4.17	4.30135	4.0755	3.87159
107481	-0.179235	0.307174	0.397014	-0.148086	0.470845	0.661644	-0.275556	0.209724	0.426194	-0.306706	0.0959152	0.138166	4.06299	3.84292	3.76034	3.78879	3.61795	3.38238	3.80335	3.48457
107489	0.242375	0.137419	0.211179	0.50813	0.0124687	0.0921108	-0.0586145	0.699206	0.814535	-0.32437	0.0624884	0.0965891	5.19936	4.92783	5.39001	5.21931	5.3473	5.14934	4.70256	4.77615
107501	-0.461568	0.142568	0.216953	0.0575092	0.848334	0.924807	-0.0961462	0.749161	0.8471	-0.615223	0.0658817	0.100842	7.14299	6.69159	6.86698	6.05396	6.40973	6.31252	6.28216	6.32511
107511	-1.12766	0.00349991	0.0161981	-0.352013	0.403122	0.602437	-1.31536	0.0122218	0.0838808	-2.091	0.000220241	0.00146528	4.05043	3.87638	3.0357	2.60968	1.42065	1.61685	1.46131	2.29658
107519	0.0376246	0.912525	0.934316	0.853914	0.09728	0.253459	-0.083513	0.845955	0.909414	-0.899802	0.0453151	0.0734593	0.68854	1.22562	0.651038	1.37619	1.08623	0.735494	0.0207379	0.0889822
107521	0.455144	0.0273433	0.0614547	0.213603	0.244842	0.443263	0.453833	0.0384501	0.154421	0.695374	0.00341382	0.0101463	8.98734	9.32188	9.43894	9.79165	10.0038	10.1198	9.83719	9.86063
107525	4.0113	1.11954e-05	0.000860122	0.216067	0.443841	0.640624	0.0246353	0.928634	0.959254	3.81987	1.49857e-05	0.00037187	1.17859	2.27664	5.63255	5.83385	5.74009	5.77528	5.64384	5.43982
107529	-0.0622449	0.67901	0.744982	-0.63439	0.00757772	0.0704212	-0.442928	0.0375927	0.152087	0.129217	0.382085	0.446152	4.49009	4.45089	4.54361	4.2595	4.06252	3.87127	4.6972	4.5008
107530	-1.04284	0.0340328	0.0723964	-0.258561	0.541952	0.718749	0.288773	0.493768	0.6633	-0.495504	0.247437	0.309323	6.95785	6.41307	6.23934	5.04632	5.90918	5.95721	6.05992	6.32329
107531	-0.103568	0.444891	0.532459	-0.171069	0.233369	0.431853	0.0545291	0.692884	0.810493	0.12203	0.364258	0.4281	5.02739	5.10454	4.99155	4.93161	5.1663	4.87127	5.15394	5.22219
107534	-1.20551	0.188253	0.268622	0.615349	0.531332	0.711144	0.975509	0.354759	0.54698	-0.845351	0.306354	0.37112	0.871018	0.237115	0.850347	-2.2483	0.46956	0.188006	0.0207379	-0.602895
107535	2.02542	0.0814473	0.141015	-0.0666176	0.948299	0.972047	-0.152937	0.883337	0.933055	1.9391	0.0885587	0.129333	-4.20223	-2.57024	-2.51889	-0.132819	-1.85237	-1.19051	-2.04965	-0.843904
107537	-0.727789	0.00158214	0.00959449	-0.0651727	0.70405	0.835511	-0.397036	0.0509474	0.182031	-1.05965	0.000198251	0.00136546	4.61901	4.80769	3.96761	4.00594	3.68161	3.49879	3.55323	3.75736
107538	0.0186108	0.955996	0.967442	-0.816946	0.0373534	0.166538	0.831194	0.0568811	0.194481	1.66675	0.000740554	0.00324693	-1.03231	-0.985278	-1.29649	-0.663334	-0.267406	-0.0530023	0.757703	0.554646
107539	-0.533792	0.0626564	0.115264	0.152285	0.631513	0.785927	-0.0756706	0.812954	0.88721	-0.761747	0.0154054	0.0302184	2.10155	2.41465	1.96224	1.45214	1.51687	1.77297	1.51106	1.47802
107546	-0.176125	0.557882	0.637458	0.274072	0.458295	0.651914	-0.268282	0.461145	0.640386	-0.718479	0.0472273	0.0761455	4.44283	3.80093	4.22258	3.63435	3.83879	3.52099	3.42932	3.37614
107554	1.81064	0.039055	0.0802618	0.862575	0.291923	0.495576	-0.318293	0.674027	0.798054	0.629769	0.415346	0.478484	-4.20223	-5.74017	-2.51889	-3.83326	-3.43733	-3.51243	-4.37158	-4.30334
107555	-0.66566	0.264866	0.352525	0.0500079	0.946093	0.971045	-0.167522	0.823329	0.894923	-0.88319	0.146045	0.196881	2.18435	3.30968	1.72904	2.47052	1.77212	2.04215	1.43578	2.29658
107556	0.190003	0.455733	0.543311	-0.242764	0.378853	0.581233	0.126491	0.656247	0.784855	0.559258	0.0445203	0.0724069	3.68245	4.03955	4.14882	3.94153	4.06252	4.28847	4.14017	4.70509
107561	3.18308	3.40107e-05	0.00131874	0.99204	0.00884747	0.0761929	0.469068	0.121017	0.305213	2.66011	0.000100166	0.000903688	1.59651	2.09904	4.66764	5.40753	5.44837	5.54556	4.568	4.4415
107563	1.7941	0.00521456	0.0180235	0.862575	0.0889441	0.239239	0.494694	0.289907	0.482973	1.42622	0.0148992	0.0294382	-5.78719	-5.74017	-4.10385	-3.83326	-3.43733	-3.51243	-4.37158	-4.30334
107564	0.828992	0.0352637	0.0742211	-0.470147	0.170694	0.357297	0.444751	0.240203	0.463926	1.74389	0.000528041	0.00255792	0.278895	0.798994	1.1056	1.65859	1.84807	1.77297	2.4486	2.10606
107566	1.00323	0.159379	0.23643	-0.539664	0.498328	0.685259	-1.27583	0.132709	0.32373	0.267061	0.691935	0.738328	-1.8803	-2.93281	-1.29649	-1.51133	-3.43733	-1.92747	-1.56422	-2.71837
107568	-0.221485	0.65024	0.719769	0.698223	0.221264	0.41907	0.60548	0.288619	0.482973	-0.314229	0.51544	0.576219	-1.56532	-0.770232	-1.60305	-1.16878	-0.377283	-1.19051	-1.25721	-1.71837
107577	-0.665268	0.00968651	0.0284452	0.400219	0.150871	0.330301	-0.30425	0.243646	0.468152	-1.36974	0.000326225	0.00186486	3.68245	3.43725	2.79097	3.01223	2.62876	2.55366	2.00346	2.38317
107579	1.64683	0.00581379	0.0195254	0.400917	0.336169	0.539896	0.536304	0.229653	0.451142	1.78221	0.00317186	0.00960408	-1.8803	-1.09631	0.419713	-0.132819	0.810597	0.575029	0.486401	0.0889822
107585	0.433296	0.313038	0.402805	0.124036	0.794828	0.891558	0.0329908	0.946086	0.969607	0.34225	0.402117	0.465896	-0.00583417	0.237115	0.419713	0.690303	0.46956	0.6892	-0.123652	1.05422
107586	2.01444	0.000207165	0.00295781	0.284548	0.278889	0.481739	0.496815	0.0949883	0.263302	2.2267	8.89341e-05	0.000842478	1.80526	2.08638	3.80904	4.12674	4.24215	4.66249	4.4065	3.93028
107588	1.47874	0.00117494	0.00800904	-1.07566	0.0083218	0.0741013	-0.497716	0.15044	0.348499	2.05669	0.000105956	0.000935001	0.0456961	-0.185576	1.51086	1.29602	0.810597	1.01113	1.77817	2.20446
107592	-0.425694	0.0862706	0.147673	-0.113099	0.621123	0.778998	-0.0372036	0.872257	0.925527	-0.349799	0.135738	0.18502	5.3896	5.00887	5.01768	4.51104	4.82946	4.64572	4.85483	4.84387
107594	-0.229443	0.339257	0.428778	0.299269	0.306184	0.509744	-0.108266	0.698975	0.814346	-0.636978	0.0280645	0.0493559	4.17136	3.64138	3.64434	3.71364	3.61795	3.52099	3.11224	3.43137
107595	0.91926	0.000413076	0.00427251	0.197441	0.186528	0.377675	0.406224	0.0215902	0.113157	1.12804	0.000130522	0.00106125	4.42104	4.72326	5.52368	5.45906	5.92242	5.87343	5.76925	5.63183
107599	0.00207502	0.988698	0.991356	0.0148409	0.920279	0.96079	0.52571	0.0130263	0.0867159	0.512944	0.00721765	0.0181674	4.02338	4.12402	4.14408	3.99963	4.62337	4.58032	4.72645	4.44486
107601	1.7941	0.00521456	0.0180235	0.862575	0.0889441	0.239239	0.494694	0.289907	0.482973	1.42622	0.0148992	0.0294382	-5.78719	-5.74017	-4.10385	-3.83326	-3.43733	-3.51243	-4.37158	-4.30334
107602	1.7941	0.0281544	0.0625911	0.0644103	0.918784	0.960091	0.494694	0.46015	0.64033	2.22439	0.0100314	0.0235776	-5.78719	-5.74017	-4.10385	-3.83326	-3.43733	-3.51243	-2.78662	-4.30334
107608	0.36401	0.327932	0.418049	-0.429531	0.300558	0.504211	-0.0864495	0.835699	0.903115	0.707091	0.0678709	0.103515	-0.787194	-0.3139	-0.0163865	-0.373828	-0.629976	0.0725286	0.151982	0.156096
107611	-1.55629	0.00136127	0.00867031	-0.484809	0.34613	0.550488	-1.51975	0.0147219	0.0919355	-2.59123	0.000158033	0.00119766	3.85666	3.99454	2.37188	2.36641	1.31756	0.394457	0.837874	1.84641
107614	0.356185	0.236079	0.322776	0.430593	0.260141	0.4611	-0.181992	0.609601	0.751085	-0.2564	0.3978	0.461433	1.89229	1.55446	1.87343	2.31649	1.51687	2.26893	1.40978	1.52955
107619	0.295459	0.0447869	0.0889356	0.112865	0.371478	0.574421	0.591445	0.00261119	0.0403215	0.774039	0.000393121	0.00210231	4.13316	4.32727	4.50718	4.54612	5.14387	5.09119	4.9526	5.05641
107621	0.99765	0.382158	0.472616	-0.528917	0.56994	0.739729	1.91027	0.111301	0.289685	3.43684	0.00919875	0.0220379	-4.20223	-5.74017	-4.10385	-3.83326	-3.43733	-0.705079	-1.56422	-1.49598
107626	1.7941	0.00521456	0.0180235	0.862575	0.0889441	0.239239	0.494694	0.289907	0.482973	1.42622	0.0148992	0.0294382	-5.78719	-5.74017	-4.10385	-3.83326	-3.43733	-3.51243	-4.37158	-4.30334
107630	0.00210353	0.994362	0.995947	0.411157	0.283189	0.486562	0.10355	0.778326	0.865466	-0.305504	0.32083	0.385759	2.07699	1.86717	2.19993	1.72133	2.05452	2.10228	2.07136	1.25125
107636	-1.62261	0.0035329	0.0163065	-0.485523	0.313829	0.517384	-2.01127	0.00372173	0.0468656	-3.14836	9.65434e-05	0.000883698	8.3206	7.8291	6.80829	6.10485	4.60159	4.28847	4.46447	5.39537
107637	-1.06922	0.0252725	0.0579433	0.652905	0.172538	0.359975	0.409398	0.374218	0.565258	-1.31273	0.0101569	0.0238179	4.44283	4.12247	2.69057	3.80337	3.61795	3.62712	2.61711	3.33329
107642	2.07086	0.00217918	0.0119865	0.194752	0.614216	0.773913	0.597693	0.178225	0.386412	2.4738	0.000610004	0.00281882	1.08317	2.35259	3.61725	3.96764	4.48748	4.27547	4.36989	3.99587
107646	0.605612	0.0264739	0.0601432	-0.0990377	0.66103	0.808572	-0.214516	0.358356	0.550374	0.490134	0.055148	0.0869431	4.67939	4.72846	5.57739	5.03402	4.90697	5.27873	5.13899	5.24933
107656	0.188491	0.222904	0.308393	0.0679031	0.642574	0.794164	0.632403	0.00348511	0.0454129	0.75299	0.00160754	0.00571484	5.8355	5.50717	5.8372	5.8827	6.46806	6.51685	6.50417	6.34502
107657	2.75271	3.74645e-05	0.0013882	0.520119	0.0969729	0.253047	0.787458	0.0244494	0.120242	3.02005	2.1752e-05	0.000427599	3.79965	4.28081	6.43531	7.14759	7.57599	7.58494	7.11072	7.00983
107658	1.61355	0.00417085	0.0180235	-0.694962	0.169144	0.355029	-0.933948	0.0818162	0.240313	1.37456	0.00840732	0.0205172	0.68854	1.1787	2.0459	3.10926	1.69195	1.53196	2.25778	2.35488
107659	-0.445238	0.0437102	0.0873619	-1.05782	0.0016518	0.034362	-0.320315	0.180596	0.38973	0.292268	0.115136	0.161166	4.54708	4.24425	4.08103	3.80337	3.74258	3.52099	4.78577	4.58845
107664	-0.397499	0.0216688	0.0515674	0.440208	0.016391	0.105727	-0.352407	0.0395564	0.157487	-1.19011	8.02261e-05	0.000802698	6.89382	6.73532	6.51912	6.31776	6.15326	5.97741	5.55175	5.69807
107669	0.335717	0.641437	0.712469	-0.416221	0.612224	0.772776	-0.0315167	0.970985	0.983426	0.720421	0.289263	0.353645	-0.429642	1.22562	0.144078	1.37619	0.650132	0.735494	0.913823	1.31137
107672	-0.192518	0.591	0.667188	-2.21159	0.00537421	0.0587121	-2.37331	0.00405704	0.0489492	-0.35424	0.322874	0.387801	1.56153	1.35787	1.1056	1.45214	-0.267406	-1.92747	1.30085	0.906118
107677	-0.474907	0.0742689	0.131077	-0.0935364	0.698642	0.831997	-0.122865	0.61693	0.75614	-0.504235	0.0591377	0.0922824	5.39458	5.46746	4.62747	5.30373	4.73759	4.92636	4.88345	4.97046
107678	1.7941	0.034134	0.0724694	1.64821	0.0407923	0.174104	1.28033	0.0901037	0.254408	1.42622	0.0737507	0.111021	-5.78719	-5.74017	-4.10385	-3.83326	-1.85237	-3.51243	-4.37158	-4.30334
107680	0.655509	0.0157616	0.0408092	0.101857	0.642124	0.793909	0.394266	0.124676	0.31113	0.947918	0.00192914	0.0065304	2.74808	2.97064	3.24488	3.81779	3.92899	3.88845	3.82318	3.78942
107686	-0.309913	0.321774	0.412224	0.441086	0.184801	0.376478	0.167231	0.592992	0.73969	-0.583768	0.0863971	0.126781	5.07622	5.36771	4.49978	5.34914	5.09015	5.06877	4.47077	4.8078
107687	0.263765	0.0820004	0.141767	0.295739	0.0549862	0.207367	0.603836	0.00291839	0.0419686	0.571862	0.00361542	0.0105847	4.91498	4.75469	5.20221	4.99011	5.64748	5.75669	5.45656	5.35666
107688	2.56513	0.0156196	0.0405472	-0.722114	0.424471	0.621883	-1.44338	0.131225	0.321227	1.84386	0.0574983	0.0900655	-3.46527	-5.74017	-2.51889	-1.51133	-3.43733	-3.51243	-2.78662	-2.71837
107701	-0.0367977	0.761714	0.814971	0.143431	0.307391	0.51067	-0.337113	0.0376712	0.152239	-0.517341	0.00406392	0.0116018	4.79683	4.82112	4.71313	4.83563	4.36357	4.50437	4.37325	4.20842
107706	1.47974	0.0167265	0.0425144	1.0424	0.0619453	0.221461	0.691178	0.180489	0.389614	1.12852	0.0466284	0.0753427	-2.61727	-2.03973	-1.29649	-0.373828	-0.267406	-0.0530023	-0.912148	-1.49598
107707	0.186061	0.283947	0.37252	0.149315	0.425058	0.622591	-0.0609028	0.741898	0.843041	-0.0241565	0.882166	0.904366	4.36636	4.12866	4.28417	4.59719	4.33746	4.40643	4.32539	4.11873
107708	2.64675	0.00635615	0.0208446	1.28321	0.0679719	0.233203	1.23222	0.0814899	0.239513	2.59576	0.0064468	0.0166448	-4.20223	-3.41824	-1.29649	-1.0259	-0.267406	0.394457	-0.464689	-1.98141
107709	0.700808	0.342005	0.431793	-1.05216	0.220235	0.41907	-0.55116	0.529513	0.693392	1.20181	0.0955963	0.137757	-0.929213	0.76763	0.540007	0.690303	0.46956	-0.342509	1.55916	0.650861
107711	-0.40884	0.517696	0.601033	-0.482374	0.552126	0.725631	-0.392771	0.639443	0.772353	-0.319238	0.585386	0.642557	0.899307	2.24283	1.1056	1.21113	0.954987	0.575029	1.65079	0.825948
107712	0.515044	0.0234835	0.0547888	0.22244	0.261385	0.46248	0.521815	0.0342446	0.145253	0.81442	0.00194086	0.00656264	2.73244	2.70692	3.15354	3.32661	3.55135	3.95517	3.63404	3.43137
107713	-0.150587	0.809943	0.854395	-0.218148	0.766214	0.875664	-0.459268	0.539282	0.701317	-0.391708	0.533578	0.593329	-1.8803	-1.83327	-1.78192	-2.2483	-3.43733	-1.51243	-1.78662	-2.71837
107714	-0.806122	0.493263	0.578406	1.32525	0.285962	0.489413	1.75553	0.186322	0.397102	-0.375838	0.734216	0.775609	-2.18312	-4.1552	-4.10385	-3.83326	-3.43733	-1.01163	-2.78662	-4.30334
107715	2.07052	0.0192414	0.047266	-1.8795	0.0510521	0.199072	-2.30918	0.0239753	0.119143	1.64084	0.0465417	0.0752433	-2.32776	-4.1552	-1.29649	-1.0259	-3.43733	-3.51243	-2.04965	-1.13341
107718	0.098564	0.456213	0.54372	-0.11844	0.377808	0.580077	0.145014	0.29228	0.485411	0.362019	0.0247802	0.0444844	5.05908	5.05884	5.1129	5.20401	5.29399	5.31093	5.55472	5.28725
107719	-0.139104	0.791137	0.838708	1.23359	0.167939	0.353475	-1.28217	0.111257	0.289631	-2.65486	0.00540215	0.0144509	1.0583	0.599685	0.940545	0.414668	0.0221008	-1.19051	-2.78662	-0.843904
107721	0.0285257	0.815912	0.858946	0.781369	0.00122254	0.0293018	0.0855956	0.549756	0.70873	-0.667248	0.00140678	0.00518091	3.95932	3.82398	3.91296	3.92829	3.92899	4.08002	3.22088	3.22805
107725	0.787079	0.0552989	0.104587	-0.58309	0.138141	0.312696	0.196275	0.622784	0.760196	1.56644	0.00156249	0.00558608	0.0456961	-0.530712	0.419713	0.690303	0.46956	1.01113	1.46131	1.18852
107726	0.674242	0.0814957	0.141063	-1.30266	0.00571608	0.0608085	0.282279	0.453499	0.636001	2.25918	0.000175795	0.00128179	7.03889	7.94856	7.96123	8.38136	8.39226	8.50124	9.85099	9.64658
107727	-0.120774	0.460635	0.547787	0.685877	0.00459849	0.0544196	0.302345	0.102809	0.276311	-0.504307	0.0161764	0.0314035	5.01451	4.88463	4.65437	5.01536	5.09794	5.16352	4.35293	4.53902
107728	0.92068	0.00910518	0.0271782	0.979657	0.0141957	0.0985429	0.222625	0.45295	0.635525	0.163648	0.551986	0.610612	0.278895	0.0927249	0.940545	1.29602	1.42065	1.24245	0.151982	0.554646
107731	2.48075	0.00139853	0.00883218	0.388418	0.39748	0.597597	0.346648	0.455739	0.637938	2.43898	0.00139069	0.00513909	-2.32776	-3.41824	-0.40341	-0.373828	0.263109	-0.342509	-0.464689	-0.396445
107733	0.875318	0.0125484	0.0344952	0.76594	0.0348667	0.160819	0.318683	0.29917	0.492751	0.42806	0.142187	0.192355	1.86386	2.41465	2.88484	3.15543	3.27691	3.38238	2.76797	2.35488
107736	1.7941	0.0278983	0.0623001	0.0765939	0.894961	0.951564	1.2934	0.0747788	0.228393	3.01091	0.00191049	0.00647829	-5.78719	-5.74017	-4.10385	-3.83326	-3.43733	-1.92747	-2.78662	-2.71837
107739	1.63944	0.000438583	0.00443638	-0.75849	0.018436	0.112567	-0.0536766	0.843974	0.907906	2.34426	3.0007e-05	0.000492911	0.899307	1.10532	2.79097	2.47052	2.49341	2.67739	3.55323	3.13129
107744	1.8932	0.0138482	0.0372012	-0.255422	0.621847	0.779497	0.518445	0.380658	0.571442	2.66707	0.00163236	0.00577539	-1.53927	-0.610882	0.540007	1.12094	0.954987	1.69702	2.03781	1.12293
107746	0.747877	0.0109615	0.0312109	0.758847	0.00971351	0.0801801	0.343504	0.144372	0.340177	0.332534	0.159662	0.212693	5.25447	4.84104	5.54541	6.04479	6.12682	6.15112	5.41795	5.34232
107747	-1.70072	0.000107256	0.00213891	-0.53308	0.107105	0.268741	-1.2039	0.00452399	0.0521219	-2.37154	1.99914e-05	0.000418238	5.13469	5.18687	3.37997	3.55045	2.34403	2.17126	2.47391	3.11452
107749	0.912171	0.0156712	0.040649	-0.074388	0.795119	0.891632	0.505857	0.143307	0.338782	1.49242	0.000823664	0.00351367	0.587846	0.97408	1.51086	1.89466	2.23509	2.15999	2.49879	2.03651
107750	-1.30697	0.0156827	0.040649	-1.0423	0.10394	0.26346	-1.38228	0.0444122	0.167595	-1.64695	0.00538086	0.0144134	5.61529	5.02719	4.55793	3.40515	2.58504	2.67739	3.41632	3.93984
107752	1.6935	0.00113089	0.00782964	0.346709	0.297023	0.500533	0.0641215	0.840536	0.905391	1.41092	0.00283625	0.0088252	3.67837	2.97751	4.77573	5.28308	5.11342	5.06121	4.9705	4.50724
107756	2.24012	0.000160247	0.00260996	-0.684785	0.0231031	0.127192	0.706458	0.0315142	0.138191	3.63136	5.37651e-06	0.000266338	1.08317	1.96719	3.70993	3.81779	4.46354	4.47056	5.20396	5.09968
107758	0.580627	0.0559792	0.105489	-0.821205	0.0192418	0.11547	0.104077	0.733096	0.83697	1.50591	0.000331421	0.00188284	2.07699	1.72744	2.40395	2.57613	2.23509	2.93051	3.36313	3.45822
107761	4.09963	0.000620731	0.00537941	-2.02	0.0069531	0.0676198	1.22302	0.0956243	0.26439	7.34264	7.2522e-06	0.000290375	2.60941	4.54639	7.17518	8.18876	9.05902	8.74171	10.9648	10.8717
107765	1.7941	0.00521456	0.0180235	0.862575	0.0889441	0.239239	0.494694	0.289907	0.482973	1.42622	0.0148992	0.0294382	-5.78719	-5.74017	-4.10385	-3.83326	-3.43733	-3.51243	-4.37158	-4.30334
107773	1.7941	0.00521456	0.0180235	0.862575	0.0889441	0.239239	0.494694	0.289907	0.482973	1.42622	0.0148992	0.0294382	-5.78719	-5.74017	-4.10385	-3.83326	-3.43733	-3.51243	-4.37158	-4.30334
107776	1.39025	9.64533e-05	0.00206863	0.442632	0.0397624	0.172222	0.112117	0.535696	0.698729	1.05973	0.000440106	0.00226427	2.1958	1.92517	3.396	3.51547	3.45749	3.66748	3.11224	3.13129
107777	0.0266223	0.85695	0.889904	-0.204335	0.247196	0.446127	0.117322	0.51643	0.681946	0.348279	0.0340394	0.0577615	3.11065	3.18761	3.11532	3.24356	3.30414	3.28198	3.37661	3.62148
107779	4.62637	0.000195991	0.00286685	0.551416	0.22506	0.422768	0.132643	0.754619	0.849945	4.2076	0.000340797	0.00191514	-2.32776	-0.248312	3.01509	3.68244	3.48153	3.44176	2.92304	2.89634
107782	1.19659	0.011482	0.0322757	0.489582	0.302047	0.505643	-0.587666	0.1966	0.409627	0.119339	0.75812	0.797133	0.190086	-0.0677398	0.850347	1.72133	0.954987	0.394457	0.272277	0.0889822
107783	1.01082	0.00635528	0.0208446	0.194765	0.471976	0.662609	-0.27308	0.322855	0.516846	0.542978	0.0712623	0.107942	4.90018	4.29738	5.82837	5.38833	5.23155	5.43885	5.27047	5.01181
107784	1.7941	0.00521456	0.0180235	0.862575	0.0889441	0.239239	0.494694	0.289907	0.482973	1.42622	0.0148992	0.0294382	-5.78719	-5.74017	-4.10385	-3.83326	-3.43733	-3.51243	-4.37158	-4.30334
107788	-1.32887	0.000359625	0.00396445	-0.0610504	0.787188	0.887576	-0.406974	0.108694	0.285534	-1.67479	9.51608e-05	0.000875216	5.6396	5.88874	4.63424	4.21659	4.15513	3.90542	3.97272	4.20842
107790	-1.39218	0.000605438	0.00532929	-0.366084	0.211958	0.410502	-0.452527	0.141895	0.336845	-1.47863	0.000360111	0.00198077	4.99662	5.29532	3.57563	3.95464	3.61795	2.99536	3.68912	3.64503
107793	0.712831	0.00116939	0.00799878	0.159701	0.253161	0.452287	0.373533	0.0271807	0.127462	0.926662	0.000243443	0.00155553	4.04094	4.20381	4.84159	4.82852	5.09794	5.31729	4.99036	5.10818
107795	-0.285041	0.275426	0.363177	0.0772506	0.788412	0.888097	0.020063	0.945921	0.969599	-0.342228	0.182885	0.239171	4.1242	3.67135	3.7227	3.48867	3.68161	3.5856	3.3079	3.81041
107799	-1.57279	0.222369	0.307733	-0.0608519	0.973639	0.98436	-1.37165	0.445737	0.630594	-2.88358	0.063858	0.0982608	2.92361	0.634874	1.02543	-0.663334	-1.1154	-1.19051	-1.20165	-0.981407
107803	0.197838	0.334575	0.424433	-0.279167	0.21012	0.408401	0.353779	0.154852	0.354424	0.830784	0.00235169	0.00761112	2.99744	3.32861	3.17228	3.57188	3.68161	3.74495	3.95485	4.03206
107804	2.10501	0.0264183	0.0600627	3.8295	0.00818932	0.0736052	0.437925	0.555721	0.712601	-1.28657	0.250091	0.312051	-0.114769	-0.0122447	0.940545	3.28568	2.49341	2.46485	-1.56422	-1.13341
107815	0.419846	0.148294	0.224027	-0.59648	0.0696547	0.236525	0.176308	0.579321	0.730345	1.19263	0.00145011	0.00530121	1.48893	1.80673	1.91852	2.23283	1.92022	2.55366	2.92304	2.75195
107817	0.264201	0.198987	0.280779	0.387426	0.0891242	0.239268	0.233988	0.27416	0.482973	0.110764	0.561556	0.619362	4.13316	4.5487	4.62066	4.58881	4.76724	4.90963	4.60856	4.29285
107819	-0.200205	0.786443	0.835066	-0.722491	0.429058	0.626221	-0.879228	0.345862	0.538789	-0.356941	0.62689	0.679554	-1.69973	-1.49224	-2.51889	-1.0259	-3.43733	-1.92747	-1.20165	-2.71837
107822	-0.489169	0.058242	0.108706	-0.291621	0.328567	0.532416	-0.405311	0.19765	0.410879	-0.602858	0.024178	0.0435869	3.08008	3.47415	2.6104	2.98692	2.34403	2.4183	2.66184	2.68535
107827	1.7941	0.00521456	0.0180235	0.862575	0.0889441	0.239239	0.494694	0.289907	0.482973	1.42622	0.0148992	0.0294382	-5.78719	-5.74017	-4.10385	-3.83326	-3.43733	-3.51243	-4.37158	-4.30334
107829	-0.76044	0.00125523	0.00831434	-0.688595	0.0035334	0.0485324	-0.387299	0.0427298	0.163698	-0.459144	0.0132621	0.0293087	7.86352	8.15361	7.16235	7.33228	6.83996	6.87988	7.52058	7.57663
107834	2.22715	0.0199616	0.0484166	-0.213633	0.828605	0.913083	-1.76759	0.0858516	0.247243	0.673198	0.437056	0.499924	-0.360929	-0.882184	2.66433	0.414668	-0.267406	-0.0530023	0.0207379	0.0889822
107835	2.36929	0.000174887	0.00272158	-0.584929	0.0601762	0.218214	0.237777	0.43297	0.619508	3.19199	1.73713e-05	0.00039608	-0.657911	-0.185576	1.72904	2.18911	1.98893	2.37021	2.84759	2.68535
107836	0.53685	0.0165017	0.0421494	-0.180133	0.314512	0.518153	0.525573	0.0173551	0.100138	1.24256	0.000261352	0.00162389	5.53755	5.643	5.93095	6.32029	6.58087	6.72478	6.93619	6.7294
107841	-0.195668	0.28779	0.376817	0.660956	0.0127938	0.0933989	0.254037	0.22822	0.448992	-0.602587	0.0113372	0.0259783	4.24209	3.99285	3.98891	3.84622	4.18472	4.16705	3.32191	3.71347
107842	0.182802	0.322975	0.413231	-0.0391954	0.834491	0.916497	0.206025	0.31477	0.509368	0.428023	0.0365257	0.0612147	3.96268	4.07842	4.41579	3.96764	4.53421	4.28847	4.43255	4.46485
107850	0.0176598	0.89652	0.922011	-0.270498	0.083872	0.239239	0.370935	0.0347357	0.146452	0.659093	0.00165578	0.00583506	4.44762	4.53868	4.54361	4.47508	4.7343	5.02541	5.11022	5.19452
107851	-0.38311	0.120563	0.19077	-0.954257	0.015131	0.101837	-0.732985	0.0489803	0.177645	-0.161838	0.433945	0.496794	2.26265	2.23138	2.0459	1.65859	0.810597	1.44176	2.16758	2.00045
107852	-0.763452	0.00114417	0.00787202	-0.00696823	0.97052	0.981872	-0.786488	0.0038044	0.0474496	-1.54297	2.91387e-05	0.000487115	4.51316	4.61849	3.86769	3.72898	3.07046	2.9633	2.88581	3.16427
107854	-0.988417	0.00221519	0.0121317	-0.234354	0.301565	0.505119	0.0291672	0.891976	0.938359	-0.724896	0.0101886	0.0238735	6.85463	6.95615	5.61554	6.21523	6.04043	5.8517	6.12328	6.23679
107857	1.97989	0.065192	0.118646	-0.722114	0.478429	0.668289	-1.08699	0.298322	0.492328	1.61501	0.116167	0.162343	-5.78719	-2.93281	-2.51889	-2.2483	-3.43733	-3.51243	-2.78662	-2.71837
107859	0.400372	0.155737	0.232012	-0.180375	0.551098	0.724838	-0.03491	0.911004	0.949921	0.545837	0.0547972	0.0864928	0.488186	0.451634	0.721936	1.0376	0.799927	0.870233	1.24313	0.781579
107861	-0.987249	0.0100181	0.0291224	0.102916	0.83242	0.915232	-1.4393	0.0138221	0.0893403	-2.52947	0.000243666	0.00155612	3.03617	2.64785	1.72904	1.99963	0.650132	0.188006	0.672815	-0.0554077
107869	-0.0949698	0.65976	0.727711	0.546522	0.0681259	0.233463	-0.133545	0.597738	0.742655	-0.775037	0.0105839	0.0246161	4.42591	3.87638	4.10072	4.00594	3.83879	4.00327	3.40321	3.34772
107873	-0.984587	0.122789	0.193589	-0.891095	0.22187	0.41949	-0.168562	0.815966	0.889106	-0.262053	0.619668	0.672946	-0.360929	0.368359	-1.78192	-0.132819	-1.1154	-1.19051	-0.464689	-0.0554077
107875	0.000248078	0.999206	0.99929	0.532487	0.0815867	0.239239	0.721653	0.0373406	0.15161	0.189415	0.421803	0.484939	2.87458	2.50301	2.88484	2.47052	3.27691	3.54285	3.04627	2.70789
107876	2.31615	0.000214964	0.00302215	-0.159835	0.534113	0.713073	0.805193	0.0244714	0.120301	3.28118	1.67322e-05	0.0003916	0.899307	1.64354	3.314	3.88784	4.41442	4.36408	4.60856	4.48783
107882	-0.439728	0.0424488	0.0855715	-0.211517	0.388951	0.59014	-0.468724	0.0866392	0.248312	-0.696935	0.00600663	0.0157436	3.33693	3.38137	2.69057	3.17797	2.34403	2.55366	2.66184	2.66245
107884	1.37429	0.0744982	0.131326	-2.76963	0.00654902	0.0654134	-1.46736	0.0928302	0.259012	2.67656	0.00345814	0.0102347	-2.61727	-4.1552	-1.78192	-2.2483	-3.43733	-3.51243	-0.284117	-1.13341
107889	0.393051	0.196907	0.278502	-1.24439	0.00235539	0.0409824	0.653612	0.0752287	0.229291	2.29105	2.77786e-05	0.000477123	1.10762	1.43974	1.51086	1.83917	1.98893	2.63731	3.56506	3.56085
107893	0.590594	0.491423	0.576644	1.00595	0.233553	0.431878	1.59487	0.0959655	0.26521	1.17952	0.168876	0.22347	-3.46527	-1.2166	-1.29649	-2.2483	0.0221008	-0.342509	-1.20165	-1.13341
107894	1.76365	0.170445	0.248556	0.478503	0.682123	0.821245	0.514332	0.666343	0.792178	1.79948	0.156113	0.208523	-4.20223	-5.74017	-4.10385	-2.2483	-1.85237	-3.51243	-2.04965	-4.30334
107896	3.16908	0.00053644	0.00503377	-0.398771	0.349667	0.553312	0.346396	0.457391	0.639276	3.91425	0.000102328	0.000916273	-2.97984	-2.03973	0.419713	0.921628	0.650132	1.34555	1.18301	1.6274
107898	-0.719383	0.00534179	0.0183112	0.611176	0.0213287	0.122369	0.019607	0.92316	0.956307	-1.31095	0.000265838	0.00164066	4.82106	4.6724	4.24045	3.78879	4.12491	3.97138	3.36313	3.51045
107899	1.81064	0.0670946	0.121205	1.66128	0.0969278	0.253047	0.480415	0.576764	0.728813	0.629769	0.485506	0.54675	-4.20223	-5.74017	-2.51889	-3.83326	-3.43733	-1.92747	-4.37158	-4.30334
107903	-0.176014	0.489153	0.574602	0.21032	0.514515	0.69914	-0.125039	0.695737	0.811841	-0.511373	0.0743839	0.111862	2.53022	3.07682	2.6104	2.64247	2.44531	2.55366	2.34267	2.23582
107909	3.75616	0.000992246	0.00721323	-0.288859	0.653141	0.80246	-0.668652	0.315368	0.510127	3.37636	0.00173744	0.00601933	-5.78719	-5.74017	-1.78192	-2.2483	-3.43733	-1.92747	-2.78662	-1.98141
107919	1.7941	0.00521456	0.0180235	0.862575	0.0889441	0.239239	0.494694	0.289907	0.482973	1.42622	0.0148992	0.0294382	-5.78719	-5.74017	-4.10385	-3.83326	-3.43733	-3.51243	-4.37158	-4.30334
107920	3.67691	5.33698e-05	0.00158708	0.664203	0.0503503	0.197561	0.785654	0.0337264	0.144028	3.79836	3.67056e-05	0.000533852	-2.08675	-1.83327	1.51086	1.9481	2.49341	2.50993	2.13622	1.52955
107923	0.60933	0.0171896	0.0433681	0.9556	0.0012795	0.0300037	1.51908	0.000181908	0.0128859	1.17281	0.00039477	0.00210477	2.9697	2.70816	3.47886	3.41562	4.78038	5.15148	4.07716	3.94649
107924	1.7941	0.00521456	0.0180235	0.862575	0.0889441	0.239239	0.494694	0.289907	0.482973	1.42622	0.0148992	0.0294382	-5.78719	-5.74017	-4.10385	-3.83326	-3.43733	-3.51243	-4.37158	-4.30334
107936	1.3099	0.0219832	0.0521135	-0.166739	0.753995	0.868	-0.475264	0.387687	0.5779	1.00137	0.0565064	0.0887214	1.59651	2.89283	3.56149	3.53306	2.75249	3.38238	3.22088	3.25891
107937	-0.0653239	0.655711	0.724414	-0.0250073	0.864251	0.93321	0.311278	0.0732568	0.226409	0.270961	0.0910324	0.132121	4.92791	4.72234	4.88767	4.62207	5.13632	5.0072	5.12228	5.06953
107939	-0.368134	0.0344758	0.072932	-0.0525416	0.710479	0.839768	0.363713	0.0367438	0.150351	0.0481207	0.732191	0.773812	5.51259	5.42034	5.2515	4.93823	5.40502	5.51823	5.53981	5.48946
107951	0.181699	0.597957	0.67364	0.114805	0.835787	0.916974	-1.64763	0.0129274	0.0863886	-1.58074	0.00738675	0.0185247	1.37268	1.20235	1.62407	1.29602	-0.549806	0.188006	-0.912148	0.340521
107958	1.7941	0.00521456	0.0180235	0.862575	0.0889441	0.239239	0.494694	0.289907	0.482973	1.42622	0.0148992	0.0294382	-5.78719	-5.74017	-4.10385	-3.83326	-3.43733	-3.51243	-4.37158	-4.30334
107959	2.21611	0.0193093	0.0473943	1.29904	0.113692	0.278113	0.497823	0.494633	0.664036	1.4149	0.096997	0.139388	-2.61727	-4.1552	-1.29649	-1.0259	-0.629976	-0.705079	-2.78662	-1.13341
107961	4.21372	6.22617e-06	0.000669509	-0.132729	0.503997	0.690746	0.595911	0.0275227	0.128325	4.94236	1.79003e-06	0.00022162	-1.03231	-0.785969	3.11532	3.51547	4.07837	3.72597	3.96381	4.10181
107963	0.316839	0.261853	0.349137	-3.7685	1.47898e-05	0.00441328	-0.940745	0.0368546	0.150546	3.1446	2.15176e-06	0.000237809	1.80526	1.53596	2.33909	1.59301	1.08623	1.01113	4.83054	4.80257
107967	1.7941	0.00521456	0.0180235	0.862575	0.0889441	0.239239	0.494694	0.289907	0.482973	1.42622	0.0148992	0.0294382	-5.78719	-5.74017	-4.10385	-3.83326	-3.43733	-3.51243	-4.37158	-4.30334
107968	1.7941	0.00521456	0.0180235	0.862575	0.0889441	0.239239	0.494694	0.289907	0.482973	1.42622	0.0148992	0.0294382	-5.78719	-5.74017	-4.10385	-3.83326	-3.43733	-3.51243	-4.37158	-4.30334
107969	1.7941	0.00521456	0.0180235	0.862575	0.0889441	0.239239	0.494694	0.289907	0.482973	1.42622	0.0148992	0.0294382	-5.78719	-5.74017	-4.10385	-3.83326	-3.43733	-3.51243	-4.37158	-4.30334
107970	2.7674	0.00195051	0.0110974	-0.148567	0.791623	0.889886	0.752023	0.206597	0.422323	3.66799	0.000459198	0.00232639	2.45598	4.12866	5.65604	6.45099	6.78788	6.82853	7.06877	6.84451
107972	1.65331	0.000303608	0.00362665	0.377592	0.123366	0.29221	0.756118	0.0145377	0.0913756	2.03183	6.72389e-05	0.00073873	2.17281	2.77947	3.98891	4.28048	4.79629	4.96735	4.5323	4.47802
107973	-0.236175	0.0938636	0.157774	-0.0483785	0.703805	0.835384	-0.423757	0.0124152	0.0842934	-0.611553	0.00198426	0.00667347	6.18973	6.07882	5.94191	5.85499	5.35383	5.59347	5.53381	5.51205
107975	0.364072	0.0366704	0.0765073	0.300211	0.0665286	0.230451	0.685928	0.00246197	0.0393874	0.749789	0.00120107	0.00462599	4.46901	4.25843	4.81799	4.63027	5.44225	5.38541	5.20774	5.01859
107976	-0.283673	0.186186	0.266401	-0.0625895	0.758542	0.870824	-0.0827701	0.687565	0.806661	-0.303854	0.157997	0.21085	5.72308	5.24069	5.35353	5.03711	5.06649	5.16352	5.15785	5.1985
107981	-0.95748	0.0724389	0.128455	1.13141	0.0576498	0.212576	1.36466	0.0347935	0.146592	-0.72423	0.133553	0.182537	-0.101814	-0.0564687	-0.592887	-1.51133	0.123384	0.528459	-1.33596	-0.262443
107989	2.60943	1.51514e-07	0.000305407	0.575643	0.00116505	0.028837	-0.105878	0.335352	0.528697	1.92791	1.03733e-06	0.000202977	2.85305	2.76763	5.41382	5.42648	5.26657	5.36101	4.75512	4.7218
108002	0.581965	0.00185284	0.010689	0.0320675	0.79152	0.889858	-0.388203	0.0146766	0.0918613	0.161695	0.199847	0.258074	4.86116	5.01054	5.56681	5.46824	5.06649	5.19147	5.13423	5.0608
108004	-0.305426	0.170228	0.248361	0.0881823	0.744241	0.863375	-0.434832	0.13777	0.331465	-0.82844	0.0059008	0.0155068	3.73244	3.47172	3.47358	3.09748	2.62876	3.08748	2.83787	2.70789
108005	1.43179	0.00203832	0.0114545	-0.0421358	0.880372	0.942843	0.44817	0.175338	0.382652	1.9221	0.000250435	0.00157991	0.0456961	-0.155203	1.21808	1.55906	2.08623	1.57503	1.71588	2.02579
108006	0.834401	0.129999	0.20233	0.369953	0.463784	0.656208	0.768196	0.182248	0.391742	1.23264	0.0296483	0.0516617	-0.577741	-0.0677398	-0.196959	1.29602	1.20653	1.34555	0.985972	0.825948
108007	-0.61929	0.016553	0.0422411	0.164347	0.528666	0.709273	-0.0734005	0.777918	0.865191	-0.857037	0.00340878	0.0101363	2.47959	2.34198	1.67751	1.92163	1.51687	1.91383	1.62842	1.47802
108008	1.83489	0.00450471	0.0180235	0.651265	0.13608	0.310385	0.827863	0.0849463	0.245918	2.01149	0.00216946	0.00713178	0.235174	-0.610882	1.51086	1.8106	2.75249	2.21549	2.16758	1.47802
108009	1.42561	0.00143316	0.00898434	0.545675	0.0613417	0.220468	0.906298	0.0124098	0.0842934	1.78624	0.000270235	0.00166178	-0.00583417	0.0927249	1.45074	1.48867	2.23509	2.50993	2.07136	1.57931
108011	0.141616	0.685562	0.750446	0.192113	0.66356	0.81002	-0.166473	0.70516	0.8178	-0.216969	0.539939	0.599675	1.28427	0.73816	0.850347	1.50088	0.988934	0.989642	1.0567	0.529555
108016	0.505259	0.00438307	0.0180235	0.435786	0.00838526	0.0743585	0.498857	0.00457953	0.0525797	0.568329	0.00235822	0.00762604	4.83064	4.72234	5.26029	5.30373	5.6738	5.88631	5.35804	5.33148
108021	0.86965	0.0750801	0.132157	-0.204722	0.681882	0.821245	-0.667459	0.207004	0.422575	0.406914	0.358119	0.42159	-0.749812	-1.2066	-0.331964	0.135753	-1.26741	-0.289011	-0.306352	-0.836056
108028	1.10486	0.00157258	0.00956209	0.290049	0.210557	0.408905	1.10611	0.00155675	0.0325152	1.92093	7.82746e-05	0.000794461	4.72159	5.17944	6.06231	6.04886	6.94096	7.38314	6.80522	6.93805
108029	0.0883418	0.486162	0.572102	0.156027	0.241071	0.439033	0.0947996	0.45805	0.639598	0.0271147	0.828293	0.857757	6.24451	6.21367	6.43822	6.19879	6.46806	6.35639	6.28752	6.22512
108030	0.35846	0.203176	0.285811	0.779127	0.0215506	0.12284	-0.296158	0.29184	0.484816	-0.716825	0.0275116	0.0485265	6.89865	6.10179	6.88413	6.83828	6.56689	6.56305	5.7996	5.77214
108032	0.172605	0.653906	0.722821	0.856555	0.112997	0.277174	0.0421679	0.927478	0.958806	-0.641783	0.149028	0.200541	0.74169	0.158527	0.460529	0.810597	1.08623	0.259452	-0.402567	0.0300885
108034	-0.511217	0.0127631	0.0349459	-0.0692784	0.680847	0.820702	0.359103	0.0825996	0.241452	-0.0828355	0.55299	0.611553	3.72653	3.82779	3.36376	3.15543	3.48153	3.76369	3.74216	3.64503
108036	0.809511	0.00900357	0.0269881	0.514104	0.0720592	0.239239	0.364494	0.182861	0.3927	0.659901	0.0192047	0.0360931	0.441625	0.409582	1.18155	1.29602	1.42065	1.77297	0.985972	1.18852
108037	-0.120825	0.883501	0.911056	-0.0394327	0.962392	0.9781	0.774862	0.402952	0.592246	0.69347	0.375155	0.438918	-1.75686	-1.96828	-0.933924	-3.10208	-1.85237	-0.57509	-1.7071	-0.620762
108042	-0.996327	0.0069559	0.0223265	-0.466004	0.23285	0.431635	-0.966189	0.031635	0.138263	-1.49651	0.000994946	0.00400146	4.11819	4.57158	3.60351	3.06156	2.39556	2.37021	3.0293	2.66245
108043	0.23219	0.181921	0.261846	0.150747	0.363919	0.565885	0.0621044	0.700315	0.815031	0.143548	0.386772	0.450787	5.53304	5.13251	5.64266	5.48641	5.59884	5.65498	5.50953	5.44318
108046	1.15263	0.0867216	0.148329	-0.0203	0.969608	0.981733	1.11002	0.0968157	0.266406	2.28295	0.00398626	0.0114265	-2.08675	-2.03973	-1.60305	-0.171054	-0.267406	0.657491	0.0653818	0.378114
108047	2.21679	0.00169686	0.0100665	-0.648434	0.265698	0.466722	-2.00072	0.00651294	0.0620418	0.864497	0.106685	0.151108	-1.39488	-1.2166	1.1056	0.690303	-1.85237	-0.342509	-0.284117	-0.602895
108048	0.169985	0.435272	0.523572	0.0551218	0.817414	0.905838	0.289751	0.276529	0.482973	0.404614	0.0715977	0.108287	1.22403	1.05425	1.32242	1.29602	1.42065	1.77297	1.51106	1.57931
108050	1.7941	0.00521456	0.0180235	0.862575	0.0889441	0.239239	0.494694	0.289907	0.482973	1.42622	0.0148992	0.0294382	-5.78719	-5.74017	-4.10385	-3.83326	-3.43733	-3.51243	-4.37158	-4.30334
108052	-1.00462	0.0250732	0.0576079	0.0478452	0.905455	0.956248	0.0549706	0.895435	0.940125	-0.997494	0.0209617	0.0387786	5.00722	4.29326	4.02027	3.22202	3.82946	3.57503	3.52929	3.77881
108060	-0.694753	0.0136466	0.0367605	-0.130031	0.609857	0.770617	0.0641636	0.809703	0.884876	-0.500558	0.0353524	0.0595324	3.37015	3.59746	2.86193	2.7059	3.16258	2.55366	3.0293	2.93507
108069	1.7941	0.00521456	0.0180235	0.862575	0.0889441	0.239239	0.494694	0.289907	0.482973	1.42622	0.0148992	0.0294382	-5.78719	-5.74017	-4.10385	-3.83326	-3.43733	-3.51243	-4.37158	-4.30334
108074	-0.481429	0.00636011	0.0208498	0.0153655	0.904446	0.956248	-0.316456	0.040953	0.160063	-0.813251	0.000428883	0.00222989	6.76091	6.56105	6.20107	6.15968	5.79868	5.92844	5.77944	5.91704
108075	-0.684604	0.15622	0.232585	-2.01178	0.0250332	0.13357	-1.89441	0.035034	0.147088	-0.567235	0.194118	0.251628	2.99744	3.38654	3.09582	1.83917	0.650132	0.575029	2.19828	3.06299
108079	1.53661	0.0619446	0.114136	-0.353957	0.665724	0.810742	-1.18767	0.168536	0.373495	0.702896	0.350757	0.414468	-3.6695	-3.23936	-2.87734	-0.895915	-3.43733	-2.78125	-2.78662	-2.71837
108086	0.552344	0.0018452	0.0106654	0.455714	0.00460032	0.0544196	0.125107	0.280586	0.482973	0.221738	0.0818356	0.121115	5.20999	5.29532	5.76188	5.84798	5.90697	5.95313	5.40814	5.54059
108093	1.7941	0.00521456	0.0180235	0.862575	0.0889441	0.239239	0.494694	0.289907	0.482973	1.42622	0.0148992	0.0294382	-5.78719	-5.74017	-4.10385	-3.83326	-3.43733	-3.51243	-4.37158	-4.30334
108094	-0.544606	0.00875309	0.0264968	-0.0867438	0.58314	0.750181	0.0206027	0.897472	0.941486	-0.437259	0.0199257	0.0371035	5.35937	5.11704	4.80604	4.57188	4.6971	4.73074	4.71853	4.88402
108102	0.0960923	0.769108	0.821483	0.509796	0.194583	0.388711	0.496703	0.221521	0.440752	0.0829996	0.78811	0.823792	2.46547	1.99454	2.66433	1.9481	2.93771	2.71638	2.07136	2.56703
108112	1.7941	0.00521456	0.0180235	0.862575	0.0889441	0.239239	0.494694	0.289907	0.482973	1.42622	0.0148992	0.0294382	-5.78719	-5.74017	-4.10385	-3.83326	-3.43733	-3.51243	-4.37158	-4.30334
108121	1.37686	0.00633334	0.0208125	0.00639604	0.984075	0.9913	0.774175	0.0644371	0.209171	2.14464	0.00035289	0.00195663	1.41542	2.2354	2.98361	3.44007	4.17148	3.77943	4.11505	3.8128
108122	0.324733	0.111813	0.180133	-0.0233608	0.899406	0.953708	0.617489	0.0192781	0.106382	0.965582	0.000684167	0.00305393	2.75584	2.88554	3.26247	3.01223	3.82006	3.70673	3.94583	3.62148
108125	-0.982943	0.0415369	0.0842597	-0.542438	0.249909	0.448829	0.432475	0.383695	0.574195	-0.00802967	0.981951	0.985348	-0.295341	-0.0677398	-1.29649	-1.0259	-0.267406	-1.19051	-0.464689	0.0889822
108126	-1.62917	0.00013905	0.00242738	-0.862448	0.0169758	0.10827	-1.30666	0.0024363	0.0393672	-2.07338	3.59893e-05	0.000530331	5.67377	5.886	4.25809	4.03093	2.44531	3.22903	3.66734	3.74651
108127	-0.881789	0.0295246	0.0649835	-1.35691	0.0205391	0.120292	-1.03765	0.0638253	0.208187	-0.562533	0.0897504	0.130657	2.52115	1.96719	1.1056	1.65859	0.46956	0.188006	1.69451	1.67394
108133	0.39138	0.515452	0.599068	-2.42582	0.00806687	0.0729787	-1.1068	0.153463	0.352663	1.7104	0.0143657	0.0294382	-2.08675	-1.83327	-0.933924	-2.2483	-3.43733	-1.92747	-0.284117	-0.215872
108135	-0.161293	0.818895	0.861166	-1.5212	0.0606075	0.219149	0.494694	0.529232	0.693253	1.8546	0.0189653	0.0357275	-3.46527	-4.1552	-4.10385	-3.83326	-3.43733	-3.51243	-1.20165	-2.71837
108137	0.0838013	0.567397	0.645856	0.37308	0.0359702	0.163574	0.670122	0.00364619	0.0463061	0.380843	0.026021	0.0462664	3.96268	4.17721	4.03058	4.29086	4.84344	4.80498	4.42738	4.47474
108145	0.0959178	0.898066	0.923204	2.62647	0.0743854	0.239239	-1.42465	0.191821	0.403927	-3.9552	0.0083184	0.0203418	1.26809	-0.454763	0.144078	0.921628	-0.629976	-1.19051	-2.78662	-4.30334
108146	1.20493	0.00906616	0.0271144	0.558619	0.164117	0.348312	-0.215595	0.554609	0.712171	0.430721	0.23891	0.300045	3.44403	4.11314	4.62747	5.35903	4.99312	4.54826	4.29731	4.11873
108152	1.03201	0.166688	0.24425	-0.0762052	0.901086	0.954336	1.33628	0.086255	0.247962	2.44449	0.00583456	0.0153734	-2.41703	-4.1552	-2.51889	-1.96142	-0.629976	-1.19051	-0.912148	-0.759839
108156	4.26001	1.40361e-05	0.000969479	-0.585452	0.137382	0.311694	-1.39827	0.00517192	0.0556645	3.44719	5.95776e-05	0.000691458	-3.46527	-2.93281	1.18155	0.921628	-0.629976	-0.0530023	0.272277	0.220227
108162	0.806392	0.00393223	0.0176183	0.333187	0.11792	0.284686	0.431222	0.0612433	0.203508	0.904428	0.00189166	0.00643823	3.83303	3.6882	4.4079	4.74039	4.84344	5.14934	4.8021	4.52639
108163	0.695401	0.00210809	0.0116893	-0.146743	0.334626	0.538432	0.196257	0.219912	0.43882	1.0384	0.000208034	0.00141563	4.05043	4.18316	4.72587	4.90483	5.04245	4.97541	5.28485	5.02534
108165	-0.63242	0.00832262	0.0254259	0.394558	0.0569914	0.211396	0.113347	0.52784	0.692112	-0.913631	0.00133608	0.00500549	5.91368	5.51191	5.13694	5.02161	5.31421	5.07628	4.77053	4.82852
108170	0.576794	0.0101435	0.0293865	0.402411	0.0510151	0.198992	0.437759	0.043329	0.164968	0.612142	0.00634211	0.0164207	3.43439	3.32323	3.77267	4.16109	4.47556	4.31411	4.05049	3.93028
108175	0.169623	0.398363	0.488276	0.154531	0.514387	0.699125	0.0538884	0.821739	0.893693	0.0689807	0.714224	0.757708	1.94752	2.21984	2.12497	2.39556	2.29059	2.32046	2.22833	2.0717
108188	-0.224784	0.165897	0.243352	-0.044479	0.78657	0.887047	-0.179522	0.303032	0.496635	-0.359827	0.0416622	0.0684488	4.79118	4.64893	4.52186	4.46595	4.22801	4.40046	4.20962	4.51365
108199	-0.771805	0.226377	0.312301	0.0644103	0.921454	0.960885	0.494694	0.474429	0.650445	-0.341521	0.55605	0.614254	-2.97984	-3.41824	-4.10385	-3.83326	-3.43733	-3.51243	-2.78662	-4.30334
108201	0.547426	0.37949	0.469924	1.10352	0.111283	0.274803	0.9667	0.158589	0.360077	0.410605	0.497081	0.558047	-3.25114	-3.97463	-2.33831	-3.83326	-2.05882	-2.13392	-3.23408	-3.16583
108202	0.815279	0.0149034	0.0391323	1.0085	0.00349359	0.0483085	1.47717	0.000830954	0.0249745	1.28395	0.00101262	0.00405049	2.57738	2.17751	3.24133	3.14173	4.4398	4.89696	3.53651	3.79364
108206	0.440207	0.0503309	0.0970987	0.418445	0.0577256	0.212724	-0.302737	0.143591	0.339252	-0.280974	0.169098	0.223665	6.29262	5.80093	6.52277	6.4533	6.20833	6.16176	5.65494	5.87782
108209	-0.00397147	0.989586	0.992163	-1.00076	0.0128389	0.0936132	0.536836	0.166974	0.371344	1.53362	0.000457672	0.00232333	0.720601	0.735568	0.754132	0.690303	0.810597	1.69702	2.28663	2.23582
108214	-0.52769	0.215146	0.299299	0.862575	0.089025	0.239239	0.494694	0.290048	0.482973	-0.895571	0.0564832	0.0887083	-3.46527	-3.41824	-4.10385	-3.83326	-3.43733	-3.51243	-4.37158	-4.30334
108218	0.0193764	0.965948	0.974933	0.330331	0.548487	0.722599	-0.0761918	0.888158	0.935745	-0.387146	0.408528	0.472229	4.24485	3.18168	4.16761	3.24356	3.65437	3.65949	3.26505	3.39015
108219	1.45331	0.000688944	0.00575454	-0.17312	0.462972	0.65552	0.693399	0.0243413	0.120008	2.31983	3.52673e-05	0.000524876	2.77123	3.16372	4.12015	4.74794	5.09015	5.13502	5.28842	5.2835
108220	1.7941	0.00521456	0.0180235	0.862575	0.0889441	0.239239	0.494694	0.289907	0.482973	1.42622	0.0148992	0.0294382	-5.78719	-5.74017	-4.10385	-3.83326	-3.43733	-3.51243	-4.37158	-4.30334
108221	1.7941	0.00521456	0.0180235	0.862575	0.0889441	0.239239	0.494694	0.289907	0.482973	1.42622	0.0148992	0.0294382	-5.78719	-5.74017	-4.10385	-3.83326	-3.43733	-3.51243	-4.37158	-4.30334
108222	1.11199	0.0129115	0.0352259	1.42893	0.00504598	0.0571818	0.0955085	0.784151	0.869127	-0.221424	0.518055	0.578328	7.0455	6.18872	7.42607	8.04671	7.75927	7.89536	6.443	6.35398
108226	-0.293044	0.134874	0.208166	-0.628992	0.03916	0.170621	-0.933271	0.00803365	0.0689089	-0.597323	0.0116538	0.0265305	3.04886	3.28497	2.99418	2.7366	1.77212	2.10228	2.57093	2.56703
108229	-0.172784	0.169707	0.247752	-0.151958	0.227215	0.424969	-0.536987	0.00289533	0.0417622	-0.557813	0.00215396	0.00709134	6.18039	6.25525	6.11168	5.97892	5.53134	5.48475	5.73911	5.58084
108230	1.7941	0.00521456	0.0180235	0.862575	0.0889441	0.239239	0.494694	0.289907	0.482973	1.42622	0.0148992	0.0294382	-5.78719	-5.74017	-4.10385	-3.83326	-3.43733	-3.51243	-4.37158	-4.30334
108231	-0.157968	0.905955	0.929233	-0.286626	0.878351	0.941789	-1.0424	0.571232	0.725227	-0.913747	0.52451	0.584552	-0.657911	2.56817	1.1056	0.414668	-1.1154	0.575029	-0.284117	0.340521
108238	0.3328	0.320829	0.411102	-0.901875	0.0170123	0.10827	1.12184	0.013352	0.0878795	2.35652	8.11122e-05	0.000808791	2.65989	3.40194	3.13456	3.61795	4.43919	4.52649	5.49106	5.27975
108239	-0.874445	0.00551414	0.0187566	-0.117471	0.656645	0.805024	-0.588229	0.0558452	0.192372	-1.3452	0.000637005	0.00290202	5.31413	5.07762	4.60696	4.00594	3.80107	3.66748	3.77308	3.93028
108240	-0.733945	0.138541	0.212275	-0.377626	0.483194	0.672662	0.156198	0.785425	0.8697	-0.200121	0.612376	0.666301	1.28962	1.24852	0.288468	0.810597	0.0221008	1.34555	0.672815	1.47802
108251	0.417834	0.553424	0.633576	0.128426	0.911935	0.958934	-2.10382	0.0752711	0.229291	-1.81441	0.0749766	0.112512	1.61369	0.409582	2.33909	0.414668	-0.629976	-0.705079	-0.464689	-1.13341
108253	1.7941	0.00521456	0.0180235	0.862575	0.0889441	0.239239	0.494694	0.289907	0.482973	1.42622	0.0148992	0.0294382	-5.78719	-5.74017	-4.10385	-3.83326	-3.43733	-3.51243	-4.37158	-4.30334
108256	0.191924	0.348388	0.438126	-0.0932042	0.747124	0.865374	-0.996541	0.00883064	0.0728925	-0.711413	0.0130467	0.0289452	3.00397	2.97064	2.92957	3.46136	1.98893	2.37021	2.31492	2.23582
108261	-0.616936	0.0178665	0.0445859	-0.536943	0.095199	0.25012	-0.898298	0.015973	0.0959299	-0.978291	0.00208605	0.00692798	3.51887	3.64138	3.0357	2.88099	2.44531	1.69702	2.49879	2.70789
108263	2.08735	0.0196692	0.0479615	0.862575	0.292361	0.495966	-0.803697	0.296053	0.489838	0.421081	0.576582	0.633813	-3.78719	-5.74017	-2.51889	-2.83326	-3.43733	-3.51243	-4.37158	-4.30334
108272	-0.199212	0.227763	0.313924	-0.236786	0.184354	0.376081	-0.126045	0.466267	0.643098	-0.0884706	0.562027	0.619709	4.97851	4.69967	4.72587	4.54612	4.40187	4.62199	4.80085	4.69948
108274	-0.0717058	0.85019	0.885194	-0.460775	0.292523	0.496101	0.055614	0.898916	0.942504	0.444683	0.23887	0.300026	-1.36765	-0.902222	-1.21632	-1.20099	-1.1154	-1.19051	-1.02108	-0.358477
108277	3.38912	5.73547e-05	0.00162997	0.66427	0.0751727	0.239239	2.75855	0.000119626	0.0110687	5.4834	2.78618e-06	0.000242508	3.13566	2.09904	6.27445	5.75046	8.663	8.87379	8.19217	8.01634
108278	-0.535748	0.0741302	0.130883	-0.350319	0.354193	0.557664	-0.670656	0.103024	0.27662	-0.856085	0.013125	0.0290757	2.77123	2.86346	1.96224	2.64247	1.69195	1.53196	1.69451	2.23582
108281	-0.559841	0.0229347	0.0538664	0.115569	0.558176	0.731397	0.139564	0.48394	0.654317	-0.535845	0.0267971	0.04744	6.08817	5.84433	5.62237	5.18633	5.67901	5.41534	5.46605	5.39537
108283	-0.423151	0.0794866	0.138242	0.279573	0.230912	0.429242	0.0429276	0.845986	0.909414	-0.659797	0.0158345	0.0309047	5.01613	5.47233	4.78793	4.85674	4.84344	4.88417	4.37996	4.79206
108286	-0.423778	0.104469	0.171378	0.491342	0.106205	0.267254	-0.329625	0.235144	0.457859	-1.24474	0.00162548	0.00576061	4.87725	5.10924	4.35148	4.80699	4.53421	3.95517	3.67827	3.82079
108290	-2.16507	0.00151382	0.00930912	-0.900645	0.147677	0.325998	-0.614363	0.325658	0.520146	-1.87878	0.00166337	0.00584802	2.70866	3.26546	1.18155	0.414668	0.46956	-0.0530023	1.30085	0.906118
108294	1.55114	0.000172895	0.00270823	0.932116	0.00328287	0.0471218	0.341847	0.132502	0.323357	0.960873	0.00251382	0.00803069	3.31347	3.19353	4.52915	5.10043	5.15138	5.1422	4.27588	4.15199
108298	-0.0426132	0.878528	0.907338	0.630973	0.0872707	0.239239	0.11516	0.720584	0.828311	-0.558426	0.0838206	0.123608	8.1378	8.81316	8.43749	8.42324	8.63848	8.45443	7.68201	8.15174
108300	-0.354231	0.386967	0.477351	-0.225171	0.606536	0.767641	-0.625937	0.181018	0.390358	-0.754997	0.0933557	0.134951	5.70716	5.34398	5.71473	4.60553	4.21372	4.86694	4.77053	4.77081
108305	1.7941	0.00521456	0.0180235	0.862575	0.0889441	0.239239	0.494694	0.289907	0.482973	1.42622	0.0148992	0.0294382	-5.78719	-5.74017	-4.10385	-3.83326	-3.43733	-3.51243	-4.37158	-4.30334
108308	4.7039	0.000345303	0.00391409	-0.961064	0.130585	0.302887	0.631914	0.349083	0.541476	6.29688	3.47888e-05	0.000522313	2.78645	5.12943	8.50186	8.8354	9.18678	9.3984	10.3465	10.1614
108309	-0.815795	0.00506389	0.0180235	0.877568	0.0281792	0.143219	-0.866542	0.0175809	0.100643	-2.55991	3.59455e-05	0.000530331	3.83669	3.90909	3.26247	2.82495	2.34403	2.04215	1.05469	1.57931
108310	-0.695412	0.082146	0.141977	-0.127759	0.722261	0.848386	-0.113188	0.752607	0.848505	-0.68084	0.0872439	0.127763	6.56015	5.98136	6.04208	5.10632	5.43611	5.49038	5.45338	5.72871
108313	0.639472	0.570509	0.648718	-0.307132	0.783442	0.885275	0.494694	0.676146	0.799295	1.4413	0.200299	0.258545	-5.78719	-3.41824	-4.10385	-3.83326	-3.43733	-3.51243	-2.04965	-4.30334
108315	0.803109	0.000370284	0.00402778	-0.150681	0.235239	0.432751	0.623224	0.00162239	0.0329335	1.57701	5.98168e-06	0.000274865	3.95596	4.10689	4.78793	4.88442	5.43611	5.47909	5.67963	5.53744
108323	2.60709	0.0122005	0.0337563	0.0762886	0.921509	0.960885	-0.318293	0.683011	0.803807	2.21251	0.02402	0.0433545	-5.78719	-5.74017	-2.51889	-3.83326	-3.43733	-3.51243	-4.37158	-2.71837
108324	-1.15792	0.00686929	0.0221121	-0.19293	0.576014	0.744403	0.30619	0.388493	0.578474	-0.658801	0.0602576	0.0938214	7.94826	8.35408	6.55882	7.42354	7.36114	7.23492	7.28975	7.6942
108335	-0.00470609	0.984555	0.988043	0.515925	0.127612	0.298311	0.0471312	0.876066	0.928392	-0.4735	0.0919385	0.133259	1.48334	1.07541	1.236	1.32298	1.22943	1.41546	0.753576	0.864183
108347	0.204641	0.0787161	0.137262	0.292747	0.0277153	0.141432	0.579778	0.00149637	0.0319511	0.491672	0.00161934	0.0057474	8.87118	8.81772	8.94968	9.15726	9.55861	9.69793	9.33556	9.33706
108349	2.0783	0.00890057	0.0268276	-0.73035	0.229934	0.428291	-0.454244	0.459582	0.64033	2.35441	0.00383771	0.0110805	-2.32776	-1.6527	0.288468	-0.132819	0.46956	-1.19051	0.383308	0.340521
108351	0.486105	0.681926	0.747151	-0.557948	0.63027	0.78539	0.634811	0.616877	0.75614	1.67886	0.149625	0.201084	-1.8803	-4.1552	-1.29649	-3.83326	-1.85237	-1.92747	-2.04965	-0.602895
108355	3.07431	0.00355297	0.0163738	0.0635218	0.923364	0.96192	0.000126937	0.999849	0.999849	3.01091	0.00366808	0.0107099	-5.78719	-5.74017	-3.10385	-2.2483	-1.85237	-3.51243	-2.78662	-2.71837
108356	1.00584	0.160867	0.237314	0.862575	0.235555	0.432751	0.494694	0.477962	0.651028	0.637955	0.35106	0.414468	-5.78719	-4.1552	-4.10385	-3.83326	-3.43733	-3.51243	-4.37158	-4.30334
108357	3.08484	0.00969586	0.0284488	1.5218	0.110237	0.273211	0.358526	0.661065	0.787939	1.92157	0.0680183	0.1037	-5.78719	-5.1552	-2.51889	-2.2483	-1.1154	-2.92747	-4.37158	-2.71837
108360	-1.03534	0.0148107	0.0389556	0.959305	0.196295	0.390888	-2.304	0.00485069	0.0539846	-4.29864	0.000113265	0.000973181	3.64952	3.14553	2.40395	2.31649	-0.629976	0.735494	-0.67114	-1.13341
108370	-0.0841685	0.716809	0.776603	0.311779	0.331884	0.535392	-0.597423	0.0773564	0.232561	-0.99337	0.0056762	0.0150358	4.06923	3.69655	3.98891	3.58459	3.48153	2.93051	2.9413	2.83622
108372	2.81158	0.000108562	0.00214892	-0.731617	0.0596343	0.217143	-0.665068	0.0879398	0.250792	2.87813	7.76046e-05	0.000790876	0.812719	1.15949	4.17692	3.36641	3.30414	2.9633	3.93858	3.78413
108375	-0.100293	0.528144	0.61054	0.25782	0.197677	0.392526	-0.27926	0.162302	0.364722	-0.637373	0.00561927	0.0149313	4.43801	4.17123	4.07108	4.35162	3.89359	3.95517	3.69988	3.6333
108377	-0.161293	0.835245	0.873826	0.863118	0.297376	0.500985	1.2934	0.150426	0.348499	0.268991	0.718369	0.761362	-3.46527	-4.1552	-4.10385	-3.83326	-3.43733	-1.92747	-2.78662	-4.30334
108379	1.7941	0.00521456	0.0180235	0.862575	0.0889441	0.239239	0.494694	0.289907	0.482973	1.42622	0.0148992	0.0294382	-5.78719	-5.74017	-4.10385	-3.83326	-3.43733	-3.51243	-4.37158	-4.30334
108387	-1.76799	0.106944	0.174335	-0.928263	0.361501	0.563594	0.940059	0.446808	0.631435	0.100332	0.882799	0.904859	1.94752	3.3124	-0.40341	2.27527	1.60706	1.97942	2.3966	3.06299
108397	2.40581	0.00300056	0.0147446	-0.465341	0.375356	0.578396	0.87601	0.120002	0.303655	3.74716	0.000288495	0.00172779	2.25173	3.30149	4.50718	5.87582	6.11149	5.99734	6.53456	6.50482
10840	-0.201496	0.121373	0.191831	-0.249841	0.0698569	0.236744	-0.39832	0.012176	0.0838135	-0.349975	0.0199014	0.0370698	6.06962	6.1398	5.99813	5.80879	5.55985	5.45046	5.76413	5.74515
108400	-1.50697	0.0553457	0.104614	0.327765	0.721201	0.847503	-0.402096	0.655839	0.784615	-2.23683	0.0144312	0.0294382	0.899307	1.95332	-0.40341	0.254204	-0.267406	-0.705079	-1.56422	-0.0554077
108405	-0.0707501	0.831582	0.87114	0.667748	0.144358	0.321399	0.154007	0.708303	0.819612	-0.584491	0.122697	0.170055	1.83193	1.2089	1.43096	1.47781	1.34613	1.85912	1.13812	0.734047
108408	1.65924	0.000633093	0.00544423	0.941504	0.0116383	0.0884468	-0.208308	0.456558	0.638561	0.509428	0.100016	0.143227	3.96268	4.45828	5.61896	6.11948	5.8177	5.50716	4.91151	4.52639
108418	0.423769	0.363451	0.453591	1.09315	0.0348361	0.160819	1.4914	0.0147761	0.0920982	0.822021	0.079216	0.117822	2.01371	2.87822	2.33909	3.46136	4.33746	4.37631	3.12827	3.40402
108424	-0.385693	0.755066	0.809454	1.47999	0.321108	0.525321	0.553879	0.689778	0.808116	-1.3118	0.328483	0.393346	-2.61727	-1.83327	-4.10385	-1.0259	-3.43733	-0.705079	-2.78662	-4.30334
108426	-0.36347	0.0703661	0.125525	0.468045	0.0297679	0.147431	0.176092	0.329592	0.52377	-0.655422	0.00722899	0.0181845	6.25549	5.87408	5.69219	5.71171	5.93118	5.82519	5.26686	5.55309
108433	0.0332087	0.760439	0.813826	0.368443	0.0111217	0.0862002	0.239223	0.0590671	0.199272	-0.0960121	0.389739	0.45383	5.46606	5.309	5.40593	5.43587	5.66333	5.65664	5.31082	5.2722
108434	1.7941	0.00521456	0.0180235	0.862575	0.0889441	0.239239	0.494694	0.289907	0.482973	1.42622	0.0148992	0.0294382	-5.78719	-5.74017	-4.10385	-3.83326	-3.43733	-3.51243	-4.37158	-4.30334
108437	0.719744	0.350705	0.440633	0.202543	0.770199	0.877958	1.28547	0.125047	0.311534	1.80267	0.0316432	0.054461	-4.20223	-2.57024	-2.51889	-2.83326	-1.85237	-0.927471	-1.20165	-1.98141
108439	-0.656619	0.00594991	0.0198264	-0.684289	0.00664451	0.065762	-0.630954	0.00938518	0.0746151	-0.603284	0.00903589	0.0217391	6.88942	7.11158	6.54989	6.13972	5.76479	5.65999	6.35549	6.43729
108441	-0.274617	0.185104	0.265074	0.80179	0.0104723	0.083554	0.141231	0.532734	0.696006	-0.935175	0.00261496	0.00828789	4.13316	3.92339	3.68405	3.83208	4.10956	3.68724	3.26505	2.91583
108442	0.54655	0.50308	0.587033	-1.0808	0.250374	0.449055	-0.668652	0.47835	0.651333	0.958693	0.235255	0.296539	-1.69973	-3.41824	-1.78192	-2.2483	-3.43733	-1.92747	-2.04965	-1.13341
108443	0.528674	0.430617	0.519007	-0.528024	0.50317	0.690326	-0.713486	0.376774	0.567466	0.343212	0.598971	0.654519	-0.279399	-1.34785	-0.855922	0.336666	-0.267406	-1.70508	-0.709374	-0.215872
108445	-0.124933	0.745439	0.801148	-0.469498	0.272709	0.474637	-0.174896	0.670002	0.79534	0.169669	0.659373	0.708842	6.54624	7.61174	6.693	7.20635	6.79749	6.75318	7.19209	7.29797
108447	-0.691015	0.0410941	0.0835866	0.635249	0.0869584	0.239239	0.635767	0.0967073	0.266227	-0.690497	0.0334683	0.0570601	1.08317	1.33665	0.754132	0.254204	0.954987	1.34555	0.582617	0.451552
108448	1.7941	0.0666765	0.120584	0.874996	0.28547	0.489083	1.2934	0.145845	0.341876	2.21251	0.0287219	0.0502676	-5.78719	-5.74017	-4.10385	-3.83326	-3.43733	-1.92747	-4.37158	-2.71837
108457	1.08739	0.0347304	0.0733573	-1.49421	0.0210499	0.121671	-1.25612	0.0474143	0.174248	1.32548	0.0116085	0.0264677	0.289622	-0.536964	1.15693	0.755306	-0.772848	0.188006	1.33992	1.06822
108463	-0.58158	0.0271074	0.0611056	0.191134	0.454731	0.649243	-0.484188	0.0830735	0.242131	-1.2569	0.000844767	0.00357685	5.21773	4.85975	4.62747	4.27003	4.17	3.78219	3.88109	3.67966
108468	1.38229	0.00819757	0.0251591	-0.118444	0.757195	0.869947	0.19591	0.633541	0.76771	1.69664	0.00209868	0.0069583	0.516587	1.05425	1.92737	2.43353	2.11726	2.59609	2.80833	2.13961
108470	-0.209872	0.0977219	0.162952	-0.00737377	0.947052	0.971365	0.562299	0.00210893	0.0369636	0.359801	0.0118082	0.026785	4.65471	4.72744	4.4622	4.50213	5.11342	4.97541	5.06305	5.03874
108471	1.28207	0.00959335	0.0282244	0.790405	0.0587099	0.215089	0.774548	0.0705375	0.220923	1.26621	0.00845927	0.0206169	-0.295341	-0.3139	0.850347	1.12094	1.51687	1.97942	1.35634	0.554646
108472	0.437932	0.00835361	0.0254944	0.154965	0.21579	0.414712	0.818285	0.000473376	0.0196438	1.10125	3.12058e-05	0.000501366	3.3952	3.26265	3.7479	3.78879	4.60159	4.56972	4.41958	4.4415
108474	0.180217	0.438369	0.526501	-0.0867584	0.735513	0.85859	0.204835	0.462361	0.640386	0.47181	0.0536029	0.0848097	2.07699	2.30968	2.16294	2.60968	2.79149	2.37021	2.61711	2.71236
108478	1.7941	0.00521456	0.0180235	0.862575	0.0889441	0.239239	0.494694	0.289907	0.482973	1.42622	0.0148992	0.0294382	-5.78719	-5.74017	-4.10385	-3.83326	-3.43733	-3.51243	-4.37158	-4.30334
108481	-0.446058	0.338437	0.428239	-0.315097	0.458408	0.651997	1.51415	0.0172359	0.0998679	1.38319	0.00738413	0.0185239	-1.14334	-0.382613	-0.933924	-1.51133	0.0221008	0.575029	0.582617	0.650861
108484	-0.840732	0.11896	0.188892	-2.01737	0.00551932	0.0598352	0.217344	0.688903	0.807656	1.39398	0.0162402	0.0314987	4.30159	5.42663	3.5182	4.58881	4.1401	4.33932	6.23668	6.28069
108485	-1.09287	0.00767951	0.0239919	-0.193429	0.546879	0.721678	0.187578	0.555196	0.712435	-0.711867	0.0450361	0.0731164	7.38633	7.12962	6.61981	5.71941	6.37485	6.33227	6.37409	6.71973
108488	0.178566	0.851088	0.885759	0.862575	0.507153	0.692999	-1.43494	0.245259	0.470343	-2.11894	0.0869604	0.127416	-1.03231	-3.41824	-1.29649	-2.83326	-3.43733	-3.51243	-4.37158	-4.30334
108490	6.87872	9.8505e-06	0.000828474	0.794177	0.0796287	0.239239	0.668911	0.128324	0.316604	6.75345	1.07916e-05	0.000337769	-0.295341	1.77553	7.54944	7.66708	8.12061	8.43118	7.54691	7.41734
108492	0.473587	0.0826978	0.142704	-0.0525649	0.825075	0.910858	-0.381286	0.143929	0.339647	0.144867	0.54958	0.608458	6.3711	5.66444	6.50441	6.48076	6.06052	6.16176	6.08272	6.24452
108494	1.61069	0.00031349	0.00367565	-0.0101939	0.963859	0.978579	1.02587	0.00339765	0.0449882	2.64675	1.51111e-05	0.000371926	5.12345	5.35193	6.55584	7.139	7.89527	7.85334	8.03755	7.72888
108497	3.13616	0.00135334	0.00864748	-1.18067	0.0534961	0.203938	-0.274416	0.631934	0.76685	4.04241	0.000210095	0.00142587	-3.46527	-2.93281	-0.644418	0.559058	-0.629976	-0.0530023	1.12027	0.554646
108502	0.807723	0.00408078	0.0180235	0.204488	0.319259	0.523373	0.402792	0.0876074	0.250277	1.00603	0.000973644	0.00394347	3.24898	2.87086	3.73535	4.01849	4.35057	4.19493	4.01644	4.11873
108503	1.1642	0.383312	0.47366	-0.956739	0.423504	0.621017	0.899253	0.500538	0.668698	3.0202	0.0324028	0.055545	-5.78719	-2.93281	-4.10385	-2.2483	-3.43733	-1.19051	-1.20165	-1.49598
108505	1.7941	0.00521456	0.0180235	0.862575	0.0889441	0.239239	0.494694	0.289907	0.482973	1.42622	0.0148992	0.0294382	-5.78719	-5.74017	-4.10385	-3.83326	-3.43733	-3.51243	-4.37158	-4.30334
108507	0.242048	0.150091	0.226055	-0.648087	0.00438668	0.0533326	0.478436	0.0253123	0.122727	1.36857	3.74397e-05	0.000540187	3.4536	3.74163	3.76034	3.92829	4.27003	4.36408	4.96604	4.96579
108508	1.45899	0.0234539	0.0547518	-0.553921	0.16685	0.351929	1.59547	0.0122055	0.0838808	3.60837	8.29905e-05	0.000814476	-2.08675	-0.882184	0.288468	-0.373828	1.69195	1.44176	2.19828	2.03651
108514	-0.30007	0.0195553	0.0477716	-0.371253	0.0121081	0.0903386	-0.293389	0.0328634	0.141661	-0.222205	0.0560478	0.0881986	7.79742	7.83194	7.47216	7.55745	7.14669	7.29573	7.56616	7.61888
108519	-1.13332	0.000828755	0.00643311	-0.123827	0.660382	0.808195	-0.789256	0.022687	0.11593	-1.79875	8.30717e-05	0.000814476	4.13018	4.10376	2.71633	3.28568	2.11726	2.26893	2.22833	2.41091
108523	0.858156	0.0262201	0.0596801	-0.104	0.815247	0.904731	-1.43012	0.0104874	0.0786293	-0.467962	0.213415	0.272674	0.190086	0.634874	1.1056	1.45214	0.0221008	-0.342509	0.272277	-0.396445
108528	0.822393	0.137906	0.211575	1.08321	0.105538	0.266157	-0.0421874	0.940812	0.966164	-0.303	0.574548	0.631881	-0.657911	-0.785969	0.540007	-0.373828	-0.629976	0.735494	-1.20165	-0.843904
108530	0.904036	0.119658	0.189622	2.03272	0.0151868	0.101837	-0.118102	0.836259	0.903379	-1.24679	0.0694138	0.105544	-2.32776	-2.28073	-1.29649	-1.51133	-1.85237	-1.19051	-4.37158	-2.71837
108531	0.53932	0.0031582	0.0152988	-0.140358	0.29429	0.498036	-0.215123	0.131327	0.321344	0.464554	0.00615249	0.0160446	4.52001	4.39041	5.02286	4.9644	4.8891	4.67244	4.91151	4.92789
108538	0.152673	0.372661	0.46282	-0.300923	0.190713	0.383483	-0.701413	0.0133387	0.0878795	-0.247817	0.170139	0.224768	3.80339	3.60191	3.90178	3.80337	3.16258	3.14578	3.64523	3.25891
108540	0.296582	0.25963	0.346715	-0.444329	0.195159	0.389535	-0.525001	0.143129	0.338429	0.215909	0.382153	0.446188	2.13762	1.98093	2.16294	2.57613	2.23509	1.44176	2.31492	2.23582
108541	0.606311	0.00330824	0.0156076	0.545267	0.00734393	0.0690214	0.411981	0.0263614	0.125565	0.473026	0.00952645	0.02266	3.4631	3.59299	4.04081	4.2382	4.61252	4.48192	3.92763	4.07604
108542	0.378564	0.115981	0.185099	0.106689	0.660586	0.808234	0.243389	0.355123	0.547266	0.515264	0.0359467	0.0603969	2.1257	2.48384	2.71633	2.64247	3.10183	2.75435	2.70524	2.93507
108546	0.696655	0.0624418	0.114928	-0.333292	0.300685	0.504238	0.64845	0.101039	0.27353	1.6784	0.000599962	0.00279078	0.321331	0.282203	0.59659	1.45214	1.51687	1.77297	2.07136	1.88649
108554	-0.411957	0.0249987	0.0574591	-0.0743705	0.645009	0.796349	0.202483	0.258726	0.482973	-0.135104	0.334947	0.400353	3.96602	4.16522	3.67094	3.63435	3.76234	3.947	4.0078	3.85148
108555	-1.43636	0.0494945	0.0960596	-1.69975	0.0406201	0.17409	-0.271304	0.717635	0.826131	-0.00792297	0.988227	0.990384	-1.8803	-1.6527	-4.10385	-2.2483	-3.43733	-3.51243	-2.04965	-1.49598
108556	-0.0050144	0.986536	0.98977	0.272577	0.445691	0.642436	0.238954	0.514746	0.680288	-0.0386372	0.891467	0.912334	2.41738	2.48384	2.27119	2.64247	2.17738	3.17407	2.52324	2.29658
108558	3.20436	0.00275466	0.0140152	-1.39333	0.0413086	0.17543	-0.0287743	0.964576	0.980116	4.56892	0.000217085	0.00145174	-3.46527	-1.49224	0.540007	0.921628	1.20653	0.188006	1.96827	2.20446
108562	0.328697	0.113288	0.181944	0.0548198	0.759056	0.871079	0.902687	0.00307512	0.043134	1.17656	0.000248616	0.00157176	3.36509	3.01138	3.45839	3.58459	4.31086	4.52649	4.30438	4.42798
108563	-0.0498948	0.848136	0.883518	-0.192031	0.470168	0.66126	0.435984	0.144476	0.340266	0.57812	0.0502724	0.0801778	4.21703	4.96978	4.64098	4.4382	4.98473	4.97541	5.16564	5.17846
108569	-0.473763	0.174754	0.253848	0.061026	0.856189	0.928751	-0.00580855	0.98616	0.992145	-0.540598	0.130879	0.179499	7.2172	6.44781	6.6865	6.04172	6.34567	6.36562	6.18397	6.40489
108581	0.643201	0.586225	0.663052	2.25513	0.13559	0.309625	0.509891	0.684622	0.804358	-1.10204	0.408942	0.472565	-1.75686	-1.62413	-2.51889	0.524293	-0.499986	-0.57509	-4.37158	-1.18897
108589	-0.137144	0.535284	0.616951	0.0758972	0.79257	0.890532	-0.358143	0.238574	0.461901	-0.571184	0.034642	0.0586007	2.53924	2.70692	2.43531	2.54178	2.49341	1.77297	2.13622	1.96345
108592	-1.03554	0.0725353	0.128569	-0.320997	0.70228	0.834214	-1.57306	0.0791966	0.235789	-2.2876	0.00600888	0.0157458	2.88876	2.44471	2.08598	1.12094	0.46956	-0.342509	-0.464689	1.25125
108606	1.78095	0.0146246	0.0386349	2.81901	0.00300113	0.0455744	0.513051	0.3692	0.559945	-0.525006	0.410859	0.474276	-4.20223	-3.41824	-2.51889	-1.51133	-1.85237	-1.19051	-4.37158	-4.30334
108616	0.0363646	0.761807	0.814994	0.392158	0.0143766	0.0992333	0.32594	0.0322181	0.139991	-0.0298532	0.799773	0.833793	4.67326	4.76664	4.75724	4.75546	4.98473	5.17756	4.64801	4.73284
108617	0.00749187	0.952639	0.965091	0.172637	0.293322	0.496975	-0.161618	0.323837	0.517792	-0.326763	0.0337285	0.0573807	3.26537	3.16973	3.20903	3.24356	3.10183	3.02672	2.88581	2.89634
108619	2.04049	0.0189636	0.0467182	0.149717	0.808898	0.899627	0.713741	0.298187	0.492276	2.60452	0.00505322	0.013708	-2.97984	-2.57024	-0.644418	-0.833259	-0.629976	0.575029	0.486401	-0.843904
108620	-1.1471	0.0366497	0.0764871	-0.444209	0.370948	0.574103	1.22942	0.0362981	0.149389	0.526527	0.266172	0.328919	6.69788	7.42238	5.24709	6.56869	7.17462	7.10503	7.48368	7.6857
108623	0.399259	0.114712	0.183715	0.383179	0.121879	0.290222	0.907344	0.00532484	0.0562454	0.923425	0.0049001	0.0133625	4.98182	4.53712	4.91017	5.41704	6.02005	6.11145	5.73956	5.62592
108625	1.7941	0.00521456	0.0180235	0.862575	0.0889441	0.239239	0.494694	0.289907	0.482973	1.42622	0.0148992	0.0294382	-5.78719	-5.74017	-4.10385	-3.83326	-3.43733	-3.51243	-4.37158	-4.30334
108626	3.02926	0.00669429	0.0216657	0.190972	0.800282	0.894163	-0.133984	0.8593	0.917899	2.7043	0.0110537	0.0254999	-3.46527	-2.93281	0.288468	-0.663334	-0.267406	-0.342509	0.486401	-1.49598
108639	-0.447463	0.232024	0.318582	0.919458	0.147724	0.326041	-0.913961	0.10602	0.281397	-2.28088	0.00179437	0.00617568	3.55043	2.82589	3.01509	2.43353	1.60706	2.04215	0.837874	0.982067
108643	1.7941	0.00521456	0.0180235	0.862575	0.0889441	0.239239	0.494694	0.289907	0.482973	1.42622	0.0148992	0.0294382	-5.78719	-5.74017	-4.10385	-3.83326	-3.43733	-3.51243	-4.37158	-4.30334
108644	1.00584	0.160867	0.237314	0.862575	0.235555	0.432751	0.494694	0.477962	0.651028	0.637955	0.35106	0.414468	-5.78719	-4.1552	-4.10385	-3.83326	-3.43733	-3.51243	-4.37158	-4.30334
108652	-0.275849	0.230613	0.31701	0.461164	0.117182	0.283512	0.0691652	0.793162	0.874325	-0.667848	0.0177703	0.0338449	3.73048	3.26265	3.27985	3.15543	3.22088	3.35793	2.90454	2.75195
108653	0.317609	0.532459	0.614348	-0.284716	0.665531	0.810742	-0.69096	0.309451	0.503995	-0.088636	0.860857	0.885642	0.954273	0.409582	0.540007	1.52429	-0.267406	0.879883	0.151982	1.05422
108654	-0.708462	0.0690319	0.123793	-0.21369	0.549811	0.723864	-0.0844093	0.8095	0.884817	-0.579181	0.123404	0.170817	7.27808	6.3624	6.37356	5.86023	6.03637	6.02478	6.17048	6.3178
108658	0.255285	0.647154	0.717193	-1.24237	0.0989759	0.256248	-0.972494	0.194805	0.407388	0.525156	0.327683	0.392615	-0.360929	-0.125455	0.144078	-0.132819	0.0221008	-1.92747	-0.123652	0.696665
108660	-1.75942	7.73213e-05	0.00184092	-0.488363	0.0766196	0.239239	-0.997183	0.00453865	0.0521901	-2.26824	1.79323e-05	0.000401576	7.09755	6.94195	5.54181	4.97087	4.36357	4.16705	4.69182	4.81301
108661	0.20927	0.810695	0.854961	1.66732	0.0723839	0.239239	2.45113	0.023871	0.119016	0.993081	0.252029	0.313944	-4.20223	-4.1552	-4.10385	-3.83326	-1.85237	-1.19051	-4.37158	-1.98141
108662	-0.189024	0.641166	0.712366	-1.33863	0.067343	0.232247	-2.77536	0.00277288	0.0413371	-1.62576	0.00830749	0.0203276	0.143543	0.409582	0.288468	-0.132819	-1.85237	-3.51243	-1.56422	-1.13341
108667	-0.83949	0.0206001	0.0496248	1.31558	0.00998834	0.0812496	-1.16193	0.00900827	0.0732805	-3.31701	4.50269e-05	0.000596636	6.29927	6.50092	5.44882	5.67255	4.80584	4.00327	2.70524	3.47145
108670	0.272039	0.061042	0.112786	0.326951	0.0412239	0.175293	0.116285	0.400604	0.590277	0.0613731	0.619941	0.673182	4.32264	4.21621	4.52915	4.55476	4.53421	4.77758	4.3461	4.31505
108673	-0.450651	0.0285853	0.063231	-0.260121	0.186732	0.377919	-0.132243	0.481519	0.652761	-0.322773	0.0839992	0.123841	7.97913	7.59299	7.30271	7.37091	7.28718	7.12147	7.47156	7.45753
108679	0.163771	0.452002	0.539509	0.0420723	0.860062	0.930463	0.237759	0.362071	0.553748	0.359458	0.104476	0.148438	2.99744	2.86346	2.90738	3.30629	3.07046	3.5856	3.22088	3.362
108685	-0.336065	0.0471934	0.0925567	-0.347657	0.0526781	0.202064	-0.216948	0.193213	0.40574	-0.205356	0.169959	0.224555	4.92963	5.15541	4.76959	4.63842	4.36357	4.61169	4.82564	4.84895
108697	2.60709	0.0046719	0.0180235	-1.09361	0.10178	0.260306	-0.318293	0.615815	0.755201	3.38241	0.000926416	0.00380906	-5.78719	-5.74017	-2.51889	-3.83326	-3.43733	-3.51243	-2.04965	-2.71837
108700	1.7941	0.00521456	0.0180235	0.862575	0.0889441	0.239239	0.494694	0.289907	0.482973	1.42622	0.0148992	0.0294382	-5.78719	-5.74017	-4.10385	-3.83326	-3.43733	-3.51243	-4.37158	-4.30334
108711	0.778862	0.0176274	0.0441646	0.266921	0.321073	0.525321	0.215389	0.421742	0.609728	0.72733	0.0221	0.0404952	4.52228	3.90549	4.78793	5.2084	5.12872	5.28523	5.02716	4.85401
108712	0.816559	0.0348779	0.0735908	-1.30231	0.00519237	0.0575696	0.0875712	0.810865	0.885497	2.20644	0.000107213	0.000942581	1.79023	2.50301	2.76652	3.17797	3.00561	3.08748	4.4957	4.20049
108713	0.702355	0.03595	0.0754537	-0.621565	0.0471185	0.191218	0.569434	0.0961784	0.265471	1.89335	0.000114487	0.000979584	1.63066	2.21984	2.52551	2.7366	3.30414	3.08748	3.93676	3.69102
108714	-0.984255	0.00131561	0.00851463	-0.589463	0.0533872	0.203718	-1.13002	0.00335782	0.044886	-1.52481	0.000134573	0.00108458	4.87725	4.53013	3.80904	3.61795	2.67119	2.50993	3.3079	3.04539
108715	0.137332	0.266354	0.354032	0.788273	0.000349794	0.0174692	0.288736	0.0405322	0.15936	-0.362205	0.0173536	0.0332103	5.32068	5.15238	5.37391	5.37376	5.59516	5.72931	4.84517	4.90368
108716	1.04434	0.355226	0.445513	-1.32823	0.295804	0.499324	-1.13741	0.377841	0.568479	1.23516	0.264128	0.326766	-2.61727	-4.1552	-0.933924	-3.83326	-3.43733	-3.51243	-2.78662	-1.49598
108726	1.7941	0.00521456	0.0180235	0.862575	0.0889441	0.239239	0.494694	0.289907	0.482973	1.42622	0.0148992	0.0294382	-5.78719	-5.74017	-4.10385	-3.83326	-3.43733	-3.51243	-4.37158	-4.30334
108741	4.69859	9.21039e-06	0.000811128	1.18295	0.00514114	0.0574235	-0.220794	0.414833	0.603467	3.29485	0.000101213	0.00091026	-0.327762	0.0411946	4.88199	4.19465	4.21372	4.44757	3.10415	3.19651
108747	0.398206	0.693107	0.757109	0.862575	0.434562	0.631935	0.494694	0.647677	0.778784	0.0303256	0.975914	0.981036	-5.78719	-2.93281	-4.10385	-3.83326	-3.43733	-3.51243	-4.37158	-4.30334
108752	-0.236535	0.173188	0.252032	-0.00279188	0.987475	0.993049	0.231389	0.247329	0.472641	-0.00235322	0.987241	0.989646	3.7539	3.55216	3.53278	3.28568	3.52845	3.76369	3.64523	3.65667
108758	0.284109	0.171346	0.249687	-0.790336	0.00485292	0.0557502	0.470356	0.0469909	0.173433	1.5448	0.000111435	0.00096491	4.19722	4.57612	4.60005	4.74794	5.32754	4.95924	5.90105	5.96228
108764	2.01225	0.112541	0.180939	-1.54882	0.166942	0.351929	0.141247	0.901669	0.944063	3.70232	0.00869727	0.021104	-5.78719	-2.28073	-2.51889	-1.51133	-1.85237	-1.92747	-0.464689	-0.215872
108766	-1.3143	0.00293023	0.0145459	-1.38248	0.01733	0.108812	-1.47682	0.0141474	0.0901084	-1.40864	0.00163878	0.00579056	3.90106	4.17721	2.74164	2.7059	0.954987	1.53196	2.22833	3.04539
108767	1.87597	0.0318198	0.0687922	0.122689	0.844272	0.922312	1.14148	0.124978	0.311427	2.89476	0.00367744	0.0107301	1.26809	3.55675	4.05097	4.52868	5.3075	5.52923	5.41469	5.17846
108769	1.55587	0.000223484	0.00309097	0.0375717	0.852198	0.926734	0.71198	0.0120597	0.0835677	2.23028	2.13071e-05	0.000427599	2.93732	3.02471	4.27553	4.82138	5.22445	5.2722	5.34781	5.07388
108770	0.217533	0.328293	0.418464	0.0141049	0.951194	0.973367	0.403683	0.140823	0.335505	0.607111	0.0158603	0.0309378	2.2735	2.70692	2.79097	2.60968	3.13252	3.08748	3.14412	3.04539
108775	0.802748	0.0170748	0.0431515	0.714947	0.0376797	0.167253	0.457922	0.144225	0.340137	0.545723	0.0659995	0.101009	2.29496	2.64785	3.17228	3.38591	3.48153	3.97138	3.25047	2.77348
108777	-0.0432801	0.700017	0.762981	-0.340472	0.0189645	0.114473	-0.0502566	0.659464	0.78736	0.246935	0.0586742	0.0916429	5.46724	5.37813	5.41382	5.34416	5.25964	5.39746	5.63825	5.70089
108781	0.0859367	0.631924	0.703604	0.438839	0.0476806	0.192256	0.146958	0.441882	0.627071	-0.205944	0.269117	0.332008	4.74711	4.65323	4.95414	4.60553	5.12109	4.74966	4.52627	4.46154
108785	1.61568	0.00511882	0.0180235	0.0295239	0.946312	0.971045	-0.266341	0.551187	0.710023	1.31981	0.012572	0.0282172	-0.577741	-0.530712	0.651038	1.52429	1.20653	0.394457	0.876348	0.650861
108791	-0.256173	0.480786	0.56695	0.282675	0.481136	0.670743	0.546681	0.22203	0.441397	0.007833	0.980713	0.98459	2.50743	3.2822	2.37188	2.93493	3.22088	3.14578	2.84759	2.95405
108793	2.53215	0.00136112	0.00867031	1.89682	0.00104067	0.0276701	2.30537	0.00066104	0.022804	2.9407	0.000423501	0.00220993	-2.61727	-1.2166	0.540007	0.690303	2.97206	2.86261	0.985972	1.05422
108794	0.1048	0.415303	0.50469	0.527555	0.00553276	0.0598722	0.32164	0.0427061	0.163698	-0.101116	0.431314	0.494018	6.93881	6.71388	6.99616	6.86805	7.26051	7.24662	6.7788	6.67323
108795	-0.700164	0.0141634	0.0378112	-0.554779	0.0590961	0.216056	-0.572292	0.0570444	0.194872	-0.717677	0.0112609	0.0258581	5.0528	5.12943	4.10072	4.70977	3.87555	3.76369	4.48951	4.25509
108796	-0.466887	0.0163641	0.0418966	0.16271	0.316671	0.520489	0.114612	0.480007	0.652402	-0.514985	0.00966598	0.022896	5.07467	4.98179	4.67423	4.4382	4.79629	4.55903	4.59709	4.42798
108802	-0.420114	0.021836	0.0518175	-0.0405248	0.795111	0.891632	0.0559334	0.72994	0.83481	-0.323656	0.0483052	0.0774648	4.62538	4.54639	4.12977	4.20566	4.33746	4.10962	4.14017	4.38666
108810	1.72069	0.00121391	0.00814003	-0.267977	0.39204	0.593013	0.244273	0.468274	0.644748	2.23294	0.000177897	0.00128985	0.0456961	0.0411946	1.388	2.18911	2.17738	1.84512	2.22833	2.32602
108814	-0.847824	0.0682096	0.122732	0.38122	0.455549	0.649728	-0.0598529	0.9041	0.945447	-1.2889	0.0151386	0.0297669	4.36636	3.72948	3.7227	2.60968	3.35709	2.93051	2.80833	2.70789
108817	-0.809103	0.00984158	0.0287366	1.03332	0.0113013	0.0868263	-1.00339	0.00720105	0.0650656	-2.84582	2.89882e-05	0.000486644	5.79354	6.08201	4.85615	5.41229	4.28377	3.97138	2.95934	3.22805
108819	1.84638	0.000476374	0.00465592	0.215361	0.465168	0.657139	0.393252	0.20111	0.415159	2.02427	0.000297222	0.001765	3.76163	4.29463	5.5127	6.23418	6.22623	6.30934	6.11726	5.98784
108827	1.50954	0.338757	0.428503	-0.116845	0.93837	0.968037	0.214986	0.890903	0.937561	1.84137	0.235533	0.296835	-3.46527	-4.1552	-4.10385	-0.373828	-0.629976	-3.51243	-2.78662	-1.13341
108830	0.10409	0.474549	0.560813	-0.0267531	0.871	0.936994	-0.128567	0.455696	0.637938	0.00227574	0.986844	0.98949	3.91498	3.75369	3.85615	4.03093	3.80107	3.81848	3.94583	3.72457
108838	3.37578	0.00494953	0.0180235	2.2594	0.0175287	0.109254	1.47955	0.0720827	0.223907	2.59593	0.0175579	0.0335207	-5.78719	-5.74017	-2.51889	-2.2483	-1.1154	-0.705079	-2.04965	-4.30334
108840	-1.39803	2.34192e-05	0.00112324	-0.323081	0.0715116	0.239227	-0.278479	0.119326	0.302845	-1.35343	2.06084e-05	0.000424058	4.95512	5.07602	3.61725	3.61795	3.22088	3.45335	3.65633	3.66821
108843	1.7941	0.00521456	0.0180235	0.862575	0.0889441	0.239239	0.494694	0.289907	0.482973	1.42622	0.0148992	0.0294382	-5.78719	-5.74017	-4.10385	-3.83326	-3.43733	-3.51243	-4.37158	-4.30334
108845	3.04761	0.000498754	0.00479318	-0.573712	0.237648	0.434923	-0.247066	0.59218	0.739126	3.37426	0.000287593	0.0017262	1.68041	3.30149	5.36579	5.70007	5.23863	5.32992	5.84395	5.87284
108846	2.81786	0.00741803	0.0234547	-0.793763	0.338817	0.542835	-1.33373	0.128065	0.31627	2.27789	0.0194538	0.0364407	-3.46527	-4.1552	-1.29649	-0.663334	-1.1154	-3.51243	-1.56422	-1.49598
108853	-0.442721	0.0494478	0.0960314	-0.684798	0.0149984	0.101219	-0.514427	0.0491679	0.178163	-0.27235	0.169273	0.223797	4.84489	5.0696	4.43143	4.60553	4.28377	3.72597	4.74476	4.62444
108854	-0.78716	0.013596	0.0366467	-0.411356	0.223111	0.420789	-1.02795	0.0132136	0.087384	-1.40375	0.000938845	0.0038485	5.01774	4.86253	4.41579	3.86023	3.43303	2.82742	3.67827	3.39015
108855	5.97783	0.000167617	0.00267128	-0.368168	0.472976	0.663475	-0.456505	0.389709	0.579779	5.88949	0.000171768	0.00126245	-4.20223	-2.03973	2.95143	2.7366	1.77212	2.99536	2.90454	2.61553
108857	-0.041323	0.815549	0.858639	-0.614319	0.0109701	0.0856932	0.553543	0.0305515	0.135526	1.12654	0.000142447	0.00112227	2.16117	2.39426	2.19993	2.27527	2.71242	2.86261	3.42932	3.37614
108859	-0.333634	0.064798	0.118207	0.160765	0.33874	0.542784	0.466026	0.0291973	0.132208	-0.0283729	0.843476	0.870685	4.09086	4.28081	3.93507	3.7592	4.18472	4.44757	4.1001	4.2163
108864	1.7941	0.00521456	0.0180235	0.862575	0.0889441	0.239239	0.494694	0.289907	0.482973	1.42622	0.0148992	0.0294382	-5.78719	-5.74017	-4.10385	-3.83326	-3.43733	-3.51243	-4.37158	-4.30334
108869	1.76365	0.0652167	0.118646	0.862575	0.348552	0.552279	-0.271304	0.751496	0.847779	0.629769	0.470572	0.531889	-4.20223	-5.74017	-4.10385	-2.2483	-3.43733	-3.51243	-4.37158	-4.30334
108871	-0.488503	0.0908331	0.153741	0.231593	0.450252	0.645706	0.0288875	0.924257	0.956803	-0.691209	0.0266888	0.0473059	4.19437	3.92695	3.37997	3.78879	3.5739	3.62712	3.04627	3.70229
108873	-0.351341	0.327846	0.418029	-0.104674	0.825225	0.910858	-0.506686	0.303948	0.497604	-0.753353	0.0638524	0.0982608	2.46547	1.86717	1.45074	2.23283	1.33877	1.28458	1.46131	1.36909
108881	-0.423343	0.0502729	0.0970495	0.141162	0.451748	0.646997	0.0559429	0.760397	0.853649	-0.508562	0.0261344	0.0464127	6.38367	5.99158	5.84598	5.68441	5.94853	5.69458	5.59276	5.76679
108887	-0.139096	0.622127	0.694315	-0.337583	0.294477	0.49811	0.273311	0.419459	0.60753	0.471798	0.098239	0.140984	-0.187281	-0.24	-0.364001	-0.340124	-0.332994	0.170139	0.227738	0.290019
108888	2.44216	0.0454615	0.0899731	0.113033	0.897301	0.952709	1.04984	0.291631	0.484603	3.37897	0.00956411	0.0227178	-4.20223	-5.74017	-1.29649	-3.83326	-1.43733	-1.51243	-1.20165	-1.98141
108889	1.78189	0.108291	0.176002	-0.175583	0.855606	0.928748	0.229446	0.820017	0.892227	2.18692	0.051522	0.0819846	-3.78719	-2.57024	-1.29649	-1.51133	-2.43733	0.0725286	-0.284117	-1.71837
108899	1.77183	0.0682244	0.122732	0.862575	0.357133	0.560076	-0.271304	0.756029	0.850822	0.637955	0.473233	0.534491	-5.78719	-4.1552	-4.10385	-2.2483	-3.43733	-3.51243	-4.37158	-4.30334
108900	2.91623	0.0366254	0.0764668	0.850046	0.457707	0.651693	0.1582	0.885216	0.933885	2.22439	0.0923296	0.133679	-5.78719	-5.74017	-4.10385	-1.51133	-1.85237	-3.51243	-2.78662	-4.30334
108917	-0.11799	0.563	0.642383	0.355636	0.171093	0.357711	-0.0785602	0.74222	0.843085	-0.552187	0.0288492	0.0504607	4.02338	3.93755	4.05097	3.65056	3.51687	4.04215	3.49261	3.362
108920	0.576306	0.123817	0.194868	0.355545	0.170055	0.356352	2.64844	9.41042e-05	0.0100202	2.8692	2.4084e-05	0.000447509	-1.53927	-1.2166	-0.933924	-0.663334	1.92022	1.77297	1.35634	1.6274
108925	0.659344	0.0306887	0.0669408	-0.246805	0.328562	0.532416	0.742565	0.0209926	0.111689	1.64871	0.000313545	0.00181939	3.85124	4.14706	4.33494	5.00909	5.52557	5.27873	5.65217	5.64357
108935	1.76365	0.0652167	0.118646	0.862575	0.348552	0.552279	-0.271304	0.751496	0.847779	0.629769	0.470572	0.531889	-4.20223	-5.74017	-4.10385	-2.2483	-3.43733	-3.51243	-4.37158	-4.30334
108940	0.590934	0.116439	0.185655	0.0537791	0.893555	0.950493	-0.62418	0.14946	0.347275	-0.0870246	0.801408	0.835147	-1.14334	-1.09631	-0.40341	-0.663334	-1.1154	-1.19051	-1.56422	-0.843904
108942	-0.888962	0.000788282	0.00622696	-0.234852	0.23054	0.428981	-0.488048	0.0329557	0.141998	-1.14216	0.000181586	0.0013041	4.89843	4.77652	3.9783	3.91493	3.33085	3.5856	3.55323	3.84132
108951	-0.807033	0.487632	0.573493	-0.804027	0.484422	0.673351	1.0141	0.436414	0.622124	1.01109	0.321283	0.386148	-1.8803	-1.09631	-4.10385	-0.373828	-0.629976	-1.92747	-0.123652	-0.843904
108960	1.24785	0.0010574	0.00749026	0.212571	0.366554	0.568945	0.271717	0.263839	0.482973	1.307	0.000766499	0.00333052	3.53248	4.04119	4.81799	5.26214	5.33416	5.27873	5.12627	5.0608
108961	-1.7609	0.041877	0.084748	-3.43975	0.00467535	0.0549262	-0.94982	0.33159	0.525403	0.729025	0.224987	0.285352	-0.7428	-0.785969	-1.29649	-3.83326	-3.43733	-3.51243	-0.284117	0.220227
108963	2.70685	0.000122138	0.00226021	0.756666	0.0350258	0.161037	0.479778	0.139587	0.333823	2.42996	0.000218613	0.00145788	0.782662	1.27106	3.37997	4.12674	4.25616	4.16705	3.59996	3.304
108968	1.7941	0.00521456	0.0180235	0.862575	0.0889441	0.239239	0.494694	0.289907	0.482973	1.42622	0.0148992	0.0294382	-5.78719	-5.74017	-4.10385	-3.83326	-3.43733	-3.51243	-4.37158	-4.30334
108969	1.7941	0.00521456	0.0180235	0.862575	0.0889441	0.239239	0.494694	0.289907	0.482973	1.42622	0.0148992	0.0294382	-5.78719	-5.74017	-4.10385	-3.83326	-3.43733	-3.51243	-4.37158	-4.30334
108970	-0.65042	0.0231221	0.054168	0.269242	0.445599	0.642428	-1.08861	0.0111319	0.0806806	-2.00827	0.000185366	0.0013162	4.01532	4.26686	3.70993	3.24356	2.71242	2.10228	2.00346	2.26652
108971	-0.678022	0.0471605	0.0925378	-0.296587	0.36114	0.563252	-0.286106	0.38635	0.576619	-0.667542	0.045533	0.0737825	4.97685	5.49046	4.20449	4.93823	4.18472	4.35175	4.53831	4.59451
108973	-0.286027	0.129838	0.202132	-0.155299	0.417465	0.615547	-0.063895	0.740865	0.842267	-0.194623	0.259971	0.322324	4.69964	4.41592	4.39201	4.13828	4.32422	4.0949	4.43899	4.28538
108974	-0.0162287	0.961788	0.971733	-0.431322	0.323925	0.528017	-0.267319	0.5484	0.70795	0.147773	0.640032	0.691313	1.24623	1.88189	1.388	1.72133	1.20653	1.34555	1.46131	1.96345
108975	-0.15205	0.561747	0.641137	0.063838	0.816034	0.904969	0.639106	0.0688854	0.218377	0.423219	0.0956732	0.137851	1.86386	2.30968	1.91852	1.9481	2.34403	2.79135	2.49879	2.51684
108980	-0.703287	0.0244306	0.0564357	-0.368023	0.236429	0.433688	0.0240613	0.938713	0.965154	-0.311202	0.190429	0.247761	3.64952	3.26265	2.74164	2.76665	2.58504	2.9633	3.34952	2.93507
108988	-0.435091	0.0127578	0.0349459	0.066006	0.619262	0.777808	0.0122542	0.925886	0.957658	-0.488843	0.00752685	0.0188002	5.86161	6.00761	5.42167	5.57825	5.61524	5.40941	5.47861	5.41263
108997	-0.116872	0.362702	0.452909	0.414174	0.0132301	0.0953012	0.0858856	0.50341	0.671019	-0.44516	0.00895039	0.0215866	5.39706	5.22201	5.22033	5.16392	5.36033	5.19837	4.81577	4.91341
109006	0.99765	0.248762	0.336075	1.64821	0.0793411	0.239239	1.28033	0.152025	0.350611	0.629769	0.452179	0.514461	-4.20223	-5.74017	-4.10385	-3.83326	-1.85237	-3.51243	-4.37158	-4.30334
109007	2.74606	0.00125477	0.00831434	-0.566552	0.302627	0.506495	-0.753337	0.189278	0.400335	2.55927	0.00167943	0.00589061	-1.26363	-0.125455	1.91852	2.18911	0.650132	1.91383	2.03781	1.67394
109009	-0.080647	0.644222	0.714498	0.663702	0.00686989	0.0671573	0.0669506	0.700231	0.815013	-0.677398	0.00628789	0.0163193	5.89536	5.41402	5.60868	5.53961	5.66858	5.61427	4.9571	4.99816
109013	-0.340296	0.134624	0.20782	-1.10284	0.00468013	0.0549283	-0.672575	0.0465214	0.172316	0.0899681	0.626125	0.678909	3.36509	3.08956	3.07606	2.67454	2.05452	2.37021	3.38997	3.24356
109018	4.21605	0.00857488	0.0260631	0.743655	0.472051	0.662637	0.16634	0.866867	0.922022	3.63874	0.0172835	0.033108	-1.8803	-5.74017	0.288468	0.559058	0.0221008	1.13142	0.272277	-0.602895
109031	-0.464961	0.167939	0.245803	-0.0071803	0.982341	0.990212	0.0511265	0.878131	0.92955	-0.406654	0.207233	0.265885	5.24967	4.83064	4.98626	4.12674	4.45141	4.79591	4.64801	4.61851
109040	-0.502606	0.560837	0.640282	1.66128	0.132731	0.305852	0.480415	0.620288	0.758424	-1.68347	0.0968692	0.139238	-3.46527	-1.83327	-2.51889	-3.83326	-3.43733	-1.92747	-4.37158	-4.30334
109043	0.343563	0.125061	0.196334	0.402641	0.0850696	0.239239	0.706325	0.0144517	0.0910268	0.647247	0.0107829	0.0249913	3.28695	3.58851	3.73535	3.83208	4.33746	4.63222	4.25413	3.91098
109045	0.262635	0.110956	0.17909	-0.127934	0.440041	0.636603	-0.22658	0.199273	0.412652	0.16399	0.279606	0.342963	4.44042	4.2471	4.69381	4.51104	4.22801	4.52649	4.508	4.50724
109052	1.08363	0.0435469	0.0871084	-0.91818	0.167889	0.353475	-2.50018	0.00390189	0.047964	-0.498366	0.326032	0.39099	-1.32776	-1.2166	-0.0163865	-0.373828	-1.85237	-3.51243	-1.56422	-1.98141
109057	1.4759	0.00029293	0.00354966	0.303562	0.178438	0.367656	0.449435	0.0720906	0.223907	1.62178	0.000138315	0.00109916	2.91671	2.84104	4.06106	4.67849	4.76724	4.84071	4.5202	4.4813
109077	0.831591	0.456707	0.5442	0.0762396	0.953194	0.974252	-0.8923	0.487253	0.657604	-0.136948	0.904241	0.923112	-2.32776	-2.93281	-2.51889	-1.0259	-1.85237	-3.51243	-4.37158	-1.13341
109081	-0.222745	0.23346	0.320002	0.233462	0.328092	0.532008	-0.473202	0.0670527	0.214652	-0.929409	0.00177972	0.00613776	3.77314	4.0688	3.67094	3.72898	3.22088	3.22903	2.80833	3.18048
109089	1.7941	0.00521456	0.0180235	0.862575	0.0889441	0.239239	0.494694	0.289907	0.482973	1.42622	0.0148992	0.0294382	-5.78719	-5.74017	-4.10385	-3.83326	-3.43733	-3.51243	-4.37158	-4.30334
109091	0.0476959	0.811662	0.855679	0.265264	0.279759	0.482654	0.192723	0.435273	0.621239	-0.0248454	0.896391	0.916195	2.75584	2.72336	3.0357	2.50659	3.10183	2.86261	2.78829	2.63918
109092	0.280374	0.290756	0.379825	-0.366473	0.234142	0.432504	-0.104573	0.733544	0.837053	0.542274	0.0503471	0.0802862	2.93048	3.46196	3.58964	3.34665	3.45749	3.28717	3.90919	3.56085
109097	3.20564	0.000259118	0.00333638	0.31744	0.507449	0.693011	-0.916429	0.0746592	0.228321	1.97177	0.00445402	0.012429	-2.61727	-2.93281	0.754132	0.0736314	-0.629976	-0.342509	-1.20165	-0.396445
109098	-0.135492	0.723921	0.783455	-0.147629	0.680096	0.820446	1.43459	0.0097452	0.0759019	1.44673	0.00345272	0.0102237	-1.53927	-0.985278	-1.29649	-1.51133	0.263109	-0.190506	0.272277	0.0889822
109102	0.604705	0.459052	0.546395	0.0644103	0.941902	0.969222	-0.271304	0.759723	0.853222	0.268991	0.737137	0.778427	-3.46527	-4.1552	-4.10385	-2.2483	-3.43733	-3.51243	-2.78662	-4.30334
109103	-0.104643	0.617445	0.689993	-0.047604	0.835784	0.916974	-0.264949	0.277482	0.482973	-0.321988	0.151164	0.202867	4.90716	4.48263	4.78185	4.38106	4.29738	4.35175	4.45814	4.28538
109113	-0.306046	0.167734	0.245532	0.671029	0.0265233	0.138366	0.1774	0.46648	0.643267	-0.799675	0.0066034	0.0169502	4.04728	3.82779	3.90178	3.32661	3.76234	3.85389	3.11224	3.16427
109115	0.903027	0.00764098	0.023925	0.712313	0.0337106	0.157483	-0.0233194	0.929669	0.959771	0.167395	0.511869	0.572442	3.62432	3.71311	4.30978	4.85674	4.67641	4.4242	4.09194	3.57318
109117	0.430933	0.0337187	0.0720362	-0.360049	0.062242	0.222045	0.109723	0.509604	0.676223	0.900705	0.00123109	0.00471124	5.22193	5.44781	5.59486	5.93658	5.94421	5.80724	6.29996	6.17138
109118	0.246511	0.294444	0.38376	0.462507	0.139931	0.3146	-0.229363	0.418565	0.606678	-0.44536	0.0943265	0.136239	3.49126	3.00467	3.57563	3.40515	3.27691	3.25575	2.63965	2.97279
109120	-0.66547	0.115401	0.184494	-1.32751	0.0265868	0.138516	-0.837053	0.136091	0.329356	-0.175013	0.604807	0.659628	0.720601	1.1302	-0.0163865	0.559058	-1.1154	-0.0530023	0.672815	0.825948
109131	1.7941	0.00521456	0.0180235	0.862575	0.0889441	0.239239	0.494694	0.289907	0.482973	1.42622	0.0148992	0.0294382	-5.78719	-5.74017	-4.10385	-3.83326	-3.43733	-3.51243	-4.37158	-4.30334
109137	1.81882	0.0419232	0.084784	0.862575	0.302768	0.506495	-0.318293	0.681407	0.802731	0.637955	0.420502	0.48363	-5.78719	-4.1552	-2.51889	-3.83326	-3.43733	-3.51243	-4.37158	-4.30334
109148	1.7941	0.00521456	0.0180235	0.862575	0.0889441	0.239239	0.494694	0.289907	0.482973	1.42622	0.0148992	0.0294382	-5.78719	-5.74017	-4.10385	-3.83326	-3.43733	-3.51243	-4.37158	-4.30334
109154	-0.722601	0.00308604	0.0150654	-0.233604	0.295743	0.499295	-0.717079	0.011709	0.0831401	-1.20608	0.000218386	0.00145786	4.42104	4.16823	3.57563	3.56762	3.0384	2.67739	3.06305	3.11452
109156	2.49415	5.55932e-07	0.000414725	0.00734179	0.945874	0.971045	1.01583	6.81906e-05	0.00903075	3.50264	5.24746e-08	0.000130012	1.961	2.065	4.43918	4.58037	5.52672	5.51823	5.53756	5.4927
109158	0.165341	0.360199	0.450558	0.459801	0.0405975	0.17409	0.409595	0.065424	0.21099	0.115135	0.502496	0.563332	4.01855	3.82398	4.06106	4.11511	4.49931	4.49319	4.24681	3.82079
109161	-0.0692978	0.71121	0.772263	0.0715999	0.761294	0.872725	-0.167883	0.488914	0.658952	-0.308781	0.127261	0.175364	2.66813	2.40449	2.46601	2.47052	2.44531	2.15999	2.31492	2.13961
109168	2.32521	0.00581752	0.0195325	0.413682	0.4265	0.623937	0.666635	0.244548	0.469506	2.57816	0.00270743	0.00851049	-0.429642	-0.882184	1.2537	2.14402	1.69195	2.9633	2.16758	1.67394
109171	-0.673307	0.0261424	0.0595715	-1.59796	0.00688639	0.0672635	-2.24445	0.00118095	0.0285949	-1.31979	0.00142669	0.00523165	4.01532	4.15617	3.48861	3.32661	0.46956	1.84512	2.63965	2.89634
109175	-0.067153	0.634925	0.706353	-0.0604087	0.660279	0.808151	0.778912	0.00136	0.0307442	0.772168	0.000720596	0.00318675	4.36382	4.13174	4.08103	4.29086	4.9763	4.94289	5.01428	5.02534
109180	-0.441472	0.0296667	0.0652241	0.171291	0.43357	0.630955	-0.254052	0.257377	0.482973	-0.866814	0.00139629	0.00515401	3.28158	3.33398	3.0357	2.67454	2.62876	2.59609	2.34267	2.54215
109183	-0.706225	0.125511	0.19673	0.00307126	0.994155	0.997079	0.116954	0.783105	0.868451	-0.592342	0.18258	0.238864	6.11027	5.65269	5.78032	4.54612	5.3473	5.23911	5.12627	5.45322
109184	0.00696573	0.982136	0.986273	-0.816007	0.0428268	0.180456	0.164632	0.661009	0.787939	0.987605	0.00762529	0.0189972	2.85305	3.54755	3.15354	3.26477	3.19203	3.54285	4.3461	4.02309
109185	1.42456	0.0582784	0.10874	1.15791	0.146647	0.324807	-0.288279	0.675881	0.799256	-0.0216374	0.974745	0.980496	-4.20223	-3.41824	-2.51889	-2.2483	-3.43733	-1.92747	-3.37158	-4.30334
109191	0.486286	0.0639052	0.117026	0.254667	0.299666	0.503493	-0.490306	0.0693657	0.218918	-0.258687	0.277844	0.341082	5.18507	4.94371	5.80454	5.29345	4.9763	5.1422	4.97936	4.63036
109194	1.59096	0.000276497	0.00345352	0.697046	0.013663	0.0963837	0.815821	0.00820435	0.0697299	1.70973	0.000146046	0.00113786	2.32655	2.88554	4.07108	4.33165	4.95069	5.06877	4.39329	4.23194
109197	0.0986697	0.576109	0.654151	-0.460493	0.074132	0.239239	-0.488483	0.0674493	0.215433	0.0706795	0.671949	0.719898	2.34723	2.25419	2.30554	2.50659	2.05452	1.77297	2.47391	2.26652
109202	0.381172	0.0481465	0.0940858	-0.42649	0.040479	0.173735	-0.00012529	0.999441	0.999525	0.807537	0.00141662	0.00520591	4.11669	3.98435	4.28847	4.58881	4.43303	4.43008	4.994	4.72086
109216	-0.317973	0.0361669	0.0757468	0.172614	0.20925	0.407499	-0.113134	0.392134	0.582299	-0.603721	0.00214056	0.00706184	6.73171	6.68006	6.52824	6.25022	6.30245	6.24745	6.08272	6.12188
109224	-1.05591	0.0029048	0.0144771	0.0686433	0.846105	0.923314	-1.10452	0.0126154	0.0850723	-2.22907	0.000100631	0.00090651	4.4186	4.20381	3.36376	3.13253	2.39556	1.91383	1.73694	2.43813
109225	1.7941	0.0743042	0.131118	-0.307132	0.711202	0.84032	0.494694	0.574933	0.72772	2.59593	0.0162787	0.0315683	-5.78719	-5.74017	-4.10385	-3.83326	-3.43733	-3.51243	-2.04965	-4.30334
109226	-0.796295	0.00183601	0.010637	0.165661	0.362482	0.564607	-0.0091631	0.95896	0.976768	-0.971119	0.00057888	0.00271921	5.08702	4.96287	4.09091	4.38106	4.36357	4.08002	3.99036	4.11873
109227	-2.20944	0.00233132	0.0125515	-1.45521	0.0515008	0.199988	-0.993504	0.17307	0.380294	-1.74774	0.00352863	0.0103969	2.68448	2.54061	1.1056	-0.373828	0.0221008	-1.19051	0.985972	0.741059
109230	-0.406871	0.230711	0.317108	-0.235215	0.630571	0.785414	-1.04783	0.0565905	0.193922	-1.21949	0.00988432	0.0233391	3.31347	3.051	2.27119	3.34665	1.60706	1.84512	2.03781	1.88649
109233	1.7941	0.00521456	0.0180235	0.862575	0.0889441	0.239239	0.494694	0.289907	0.482973	1.42622	0.0148992	0.0294382	-5.78719	-5.74017	-4.10385	-3.83326	-3.43733	-3.51243	-4.37158	-4.30334
109234	2.3022	0.153906	0.229628	-1.30051	0.379223	0.581469	-0.437504	0.773887	0.862234	3.1652	0.0536544	0.0848574	-5.78719	-2.03973	-2.51889	-0.663334	-3.43733	-0.705079	-0.912148	-0.602895
109239	-0.0697519	0.672225	0.739033	0.0952361	0.619958	0.778134	-0.00772904	0.96836	0.982101	-0.172717	0.296758	0.36118	3.64117	3.80866	3.7479	3.55045	3.80107	3.49879	3.65633	3.44486
109241	0.0475354	0.883218	0.910953	-0.0137481	0.966431	0.980061	0.813541	0.0590894	0.199291	0.874825	0.0161548	0.0313739	0.190086	0.0927249	-0.0163865	0.414668	0.650132	1.34555	0.913823	1.12293
109244	1.42039	0.031715	0.0686028	0.0698071	0.888874	0.947624	0.869448	0.139993	0.334526	2.22003	0.00335571	0.0100209	-3.46527	-4.1552	-2.51889	-2.2483	-1.85237	-1.19051	-1.20165	-1.98141
109248	3.03759	3.75126e-05	0.0013882	0.093107	0.741626	0.862268	-0.220725	0.445988	0.63065	2.72376	6.92929e-05	0.000751968	-1.03231	-1.6527	1.62407	1.78145	1.42065	1.53196	1.24313	1.52955
109250	0.0652942	0.796549	0.843396	-0.135502	0.684488	0.822847	-0.509138	0.158445	0.359818	-0.308342	0.251138	0.313031	2.91671	3.2757	2.86193	3.49766	2.75249	2.55366	2.66184	2.91583
109259	-0.281249	0.166792	0.244364	-0.0196256	0.924029	0.962121	0.0186715	0.930074	0.95991	-0.242952	0.205722	0.26426	4.42104	4.34065	4.3266	3.84622	4.27003	3.97138	4.1001	4.17645
109260	0.151991	0.42817	0.516591	-0.480263	0.0387183	0.169531	0.0845863	0.667149	0.7929	0.71684	0.00606077	0.0158539	4.54708	4.91894	4.89897	4.87064	4.81533	5.12056	5.5724	5.32784
109263	4.30574	4.05679e-05	0.00143103	1.31228	0.00811146	0.0732363	0.00214825	0.994665	0.996753	2.9956	0.000446966	0.00228675	-0.7428	0.76763	4.12015	4.51989	4.29738	4.32677	3.06305	2.93507
109272	0.150308	0.457914	0.54539	0.327738	0.21395	0.412811	-0.174458	0.482738	0.653546	-0.351888	0.117453	0.163929	3.3952	3.12092	3.5182	3.28568	3.13252	3.33306	2.70524	3.11452
109282	1.56006	0.00206194	0.0115315	0.505319	0.134033	0.307893	0.645008	0.0805609	0.237645	1.69975	0.000995004	0.00400146	1.43197	1.67769	2.83867	3.42413	3.45749	4.04981	3.45497	3.04539
109283	0.720492	0.155324	0.231541	-0.605369	0.271959	0.473884	-0.683909	0.22649	0.446489	0.641951	0.190762	0.248113	-2.3812	-3.0177	-2.17785	-1.76287	-2.9519	-2.37493	-1.73931	-2.37734
109284	1.7941	0.00521456	0.0180235	0.862575	0.0889441	0.239239	0.494694	0.289907	0.482973	1.42622	0.0148992	0.0294382	-5.78719	-5.74017	-4.10385	-3.83326	-3.43733	-3.51243	-4.37158	-4.30334
109288	0.110633	0.523278	0.606158	0.465254	0.0411888	0.175248	0.119602	0.532626	0.695941	-0.23502	0.198911	0.257004	4.2531	4.12557	4.10072	4.51989	4.43919	4.40046	3.85242	4.05861
109290	1.00584	0.160867	0.237314	0.862575	0.235555	0.432751	0.494694	0.477962	0.651028	0.637955	0.35106	0.414468	-5.78719	-4.1552	-4.10385	-3.83326	-3.43733	-3.51243	-4.37158	-4.30334
109292	-0.572901	0.0385307	0.0794992	-0.984622	0.0221698	0.124351	-1.24724	0.00832929	0.0702603	-0.835517	0.007773	0.0193168	3.37015	3.79705	2.86193	3.17797	1.60706	1.91383	2.66184	2.83622
109300	-0.339996	0.134302	0.207378	-0.600529	0.0562012	0.20971	-0.539174	0.0866284	0.248312	-0.278641	0.181851	0.238053	3.44081	3.12711	2.88484	3.01223	2.49341	2.32046	3.19066	2.81561
109302	2.41784	0.000410301	0.00425857	-0.0645795	0.86011	0.930463	0.019122	0.958276	0.976543	2.50154	0.000342263	0.00192066	3.84762	4.91044	6.70913	6.88527	7.00665	6.62584	7.02342	6.73901
109304	3.31968	0.0114609	0.0322256	0.536941	0.545801	0.721449	0.365483	0.681554	0.802825	3.14822	0.0138712	0.0294382	-2.61727	-5.74017	-1.29649	-0.373828	-0.629976	-0.342509	-0.912148	-1.13341
109309	1.74919	0.175714	0.2549	0.0762886	0.952897	0.974231	-0.627435	0.624191	0.761171	1.04546	0.40431	0.468165	-3.46527	-5.74017	-4.10385	-1.51133	-3.43733	-3.51243	-4.37158	-2.71837
109311	1.7941	0.00521456	0.0180235	0.862575	0.0889441	0.239239	0.494694	0.289907	0.482973	1.42622	0.0148992	0.0294382	-5.78719	-5.74017	-4.10385	-3.83326	-3.43733	-3.51243	-4.37158	-4.30334
109312	0.0599878	0.906465	0.929596	-2.94167	0.00205881	0.0381256	-1.67794	0.0335857	0.143684	1.32373	0.0229316	0.0417053	-1.8803	-1.83327	-2.51889	-1.0259	-3.43733	-3.51243	-0.464689	-0.602895
109317	1.25149	0.000718589	0.00588277	0.49716	0.0537396	0.204409	0.107531	0.624407	0.761357	0.861858	0.00487324	0.0133134	3.64117	3.91983	4.81799	5.25685	5.14387	5.13502	4.82071	4.46154
109318	1.7941	0.00521456	0.0180235	0.862575	0.0889441	0.239239	0.494694	0.289907	0.482973	1.42622	0.0148992	0.0294382	-5.78719	-5.74017	-4.10385	-3.83326	-3.43733	-3.51243	-4.37158	-4.30334
109319	1.7941	0.00521456	0.0180235	0.862575	0.0889441	0.239239	0.494694	0.289907	0.482973	1.42622	0.0148992	0.0294382	-5.78719	-5.74017	-4.10385	-3.83326	-3.43733	-3.51243	-4.37158	-4.30334
109323	-0.214111	0.108028	0.175718	0.357404	0.0192533	0.115481	0.0699696	0.561289	0.717449	-0.501546	0.00420822	0.0118887	6.11179	5.94107	5.75258	5.87237	5.91361	5.8517	5.47548	5.57472
109327	4.4881	0.00603857	0.0200658	0.13016	0.856455	0.928784	1.57199	0.104872	0.279596	5.92993	0.000916237	0.00377832	-3.46527	-5.74017	-1.29649	1.16674	1.69195	1.24245	1.46131	1.20129
109334	4.08198	0.000529383	0.00497907	-1.81893	0.00473872	0.0551745	1.5011	0.0148944	0.0924013	7.40201	1.44542e-05	0.000363284	-0.577741	1.91089	4.84744	4.61382	6.13442	6.33775	8.10997	7.99902
109338	-0.0690027	0.827492	0.868151	-0.688924	0.084091	0.239239	0.0795255	0.836644	0.903482	0.699447	0.0350001	0.0590725	0.190086	0.634874	0.419713	0.254204	0.263109	0.575029	0.913823	1.31137
109339	-0.78869	0.0120866	0.0335267	-0.0819342	0.761741	0.873061	-0.658209	0.0411832	0.160484	-1.36496	0.000882096	0.003682	5.49763	5.73303	5.04844	4.58881	4.47556	3.87127	4.18684	4.31505
109343	3.23248	0.000405253	0.00422454	1.25813	0.0230696	0.127186	0.367786	0.387303	0.577567	2.34213	0.00277139	0.00867085	0.622197	1.59075	3.80904	4.91157	4.62337	4.77758	3.41632	3.47145
109345	3.55076	0.000817518	0.00638368	0.862517	0.189931	0.382425	-0.473788	0.424238	0.612298	2.21446	0.0107908	0.0250046	-4.20223	-5.74017	-1.78192	-1.0259	-1.85237	-1.92747	-2.78662	-2.71837
109348	-1.13214	0.00285746	0.0143373	-0.363778	0.342882	0.547293	-1.44008	0.00493659	0.0544148	-2.20844	0.000130085	0.00105848	4.87012	5.16597	4.13932	3.60137	2.29059	2.59609	2.54728	3.08037
109352	-0.0337048	0.832471	0.871918	0.747739	0.00408293	0.051407	0.297311	0.123535	0.309295	-0.484132	0.019444	0.0364332	4.28293	4.23568	4.12977	4.33165	4.68679	4.36408	3.89052	3.65667
109353	-0.106805	0.886306	0.91316	0.12101	0.859368	0.929956	1.59251	0.068995	0.218386	1.36469	0.0784127	0.116875	3.15239	5.06316	3.34736	4.73279	5.74009	5.45046	5.5034	5.44318
109356	0.533742	0.00696244	0.0223337	0.363724	0.065721	0.228611	-0.575028	0.00982296	0.0761422	-0.40501	0.0283126	0.0497189	4.28024	3.98605	4.63424	4.70202	4.01388	4.16705	3.74216	3.71347
109357	-0.793379	0.00268914	0.0137995	0.321095	0.189522	0.381988	-0.507084	0.0502808	0.180551	-1.62156	7.76564e-05	0.000790876	4.49705	4.31647	3.7479	3.46136	3.22088	2.99536	2.63965	2.93507
109359	-1.48984	0.00104837	0.00747259	-0.687681	0.0855941	0.239239	-0.464867	0.235872	0.458604	-1.26702	0.00142958	0.00524062	2.16117	1.95332	0.850347	0.254204	0.263109	-0.0530023	0.757703	0.825948
109361	-1.00379	8.67191e-05	0.00194567	0.213166	0.14627	0.324392	0.061172	0.656867	0.785372	-1.15579	3.18688e-05	0.00050449	4.77981	4.70588	3.7479	3.72898	3.85729	3.74495	3.57679	3.59753
109362	1.39613	0.0021585	0.0119001	0.0764198	0.77621	0.880772	0.659816	0.0575132	0.195938	1.97953	0.000188988	0.00133477	1.41248	1.96719	2.81501	3.38591	3.70222	3.78219	3.79333	3.53587
109372	3.34333	0.0362231	0.0758258	0.0829905	0.951349	0.973367	-1.0386	0.438053	0.623411	2.22173	0.138628	0.188308	-5.78719	-3.41824	-2.51889	0.0736314	-3.43733	-1.19051	-2.78662	-1.98141
109373	2.2361	6.86846e-05	0.00174506	-0.0985655	0.638107	0.791154	0.610957	0.0320272	0.13945	2.94562	7.92045e-06	0.000303982	0.65575	1.08001	2.88484	3.34665	3.80107	3.62712	3.84274	3.77881
109386	1.32448	1.00371e-05	0.000828474	0.0334463	0.757816	0.870409	0.168528	0.152041	0.350611	1.45956	5.71275e-06	0.000274071	4.4137	4.41339	5.73378	5.74228	5.93988	5.87343	5.94922	5.79733
109390	0.545326	0.192471	0.273395	-1.39488	0.0180086	0.110914	-0.505067	0.32967	0.523821	1.43514	0.00382088	0.0110506	0.871018	1.27106	1.1056	2.18911	1.08623	1.13142	2.70524	2.29658
109393	1.58355	0.000202571	0.00292944	0.269179	0.236039	0.433173	0.228337	0.312763	0.507345	1.54271	0.000217225	0.00145174	3.25993	3.45213	4.65437	5.24088	5.09794	5.23576	4.86921	4.92789
109397	0.639472	0.464796	0.551636	0.862575	0.358571	0.5608	0.494694	0.588846	0.736736	0.271591	0.752189	0.792211	-5.78719	-3.41824	-4.10385	-3.83326	-3.43733	-3.51243	-4.37158	-4.30334
109398	2.17127	0.0282204	0.062691	-2.14571	0.010375	0.0831548	1.02752	0.205696	0.421353	5.34451	0.000130064	0.00105848	4.53586	7.21221	8.02833	8.05739	9.00328	9.13525	11.2538	11.1767
109399	0.399584	0.0223595	0.0528586	-0.567948	0.00475489	0.0551745	0.515796	0.00707218	0.064487	1.48333	2.66437e-05	0.000468364	5.62167	5.36705	5.99813	5.79062	6.39398	6.42568	6.99965	6.95582
109406	1.14341	0.128726	0.20082	0.0644103	0.936068	0.966885	-1.08699	0.191532	0.403481	-0.0079896	0.991073	0.992403	-4.20223	-2.85264	-2.51889	-2.2483	-3.43733	-3.51243	-2.78662	-4.30334
109407	-1.28692	0.00149475	0.00924961	-1.24993	0.00218209	0.039403	0.50611	0.138744	0.332784	0.469126	0.0321488	0.0551651	2.74028	3.10219	1.45074	1.83917	2.17738	2.10228	3.42932	3.34772
109412	3.45826	6.2588e-05	0.00169016	0.48826	0.150505	0.329861	0.210932	0.507687	0.67428	3.18093	9.80079e-05	0.000892994	0.899307	1.05425	4.83573	3.99329	4.49931	4.78677	4.33232	3.97744
109415	1.7941	0.00521456	0.0180235	0.862575	0.0889441	0.239239	0.494694	0.289907	0.482973	1.42622	0.0148992	0.0294382	-5.78719	-5.74017	-4.10385	-3.83326	-3.43733	-3.51243	-4.37158	-4.30334
109423	-0.141754	0.180926	0.260845	0.229656	0.0697837	0.23663	0.272758	0.0436372	0.165666	-0.0986519	0.316728	0.381557	9.09129	9.22819	8.93713	9.10467	9.27175	9.30834	9.04825	9.0732
109424	1.42752	0.000354408	0.00394861	0.522787	0.0526639	0.202064	0.14781	0.521891	0.686499	1.05254	0.00184975	0.0063214	2.18435	2.39426	3.45839	4.00594	3.92899	3.80045	3.37661	3.304
109425	1.12036	0.000115939	0.00223639	1.13812	0.000101423	0.00931215	0.327243	0.0427053	0.163698	0.309483	0.0536242	0.0848321	4.70566	4.8019	5.72746	6.02005	6.17554	6.22735	5.02716	5.09968
109428	-0.466206	0.0250806	0.0576123	0.577552	0.0102919	0.0827233	0.247373	0.168497	0.373478	-0.796384	0.00220653	0.00722952	6.13279	5.68348	5.44882	5.43587	5.70478	5.67492	5.14609	5.07821
109429	-0.00825423	0.958022	0.968981	0.00934811	0.957676	0.976118	-0.0643534	0.722609	0.829732	-0.0819557	0.594292	0.650717	4.25857	4.02967	4.18617	4.07963	4.06252	4.08002	4.20962	3.91098
109435	-0.386074	0.162503	0.239216	0.43042	0.150669	0.330056	0.28355	0.329439	0.52377	-0.532944	0.0647168	0.0993517	4.80713	4.20381	4.314	3.90145	4.34403	4.45911	3.90919	4.03651
109438	1.89124	5.23795e-05	0.00157879	0.229975	0.262955	0.464363	0.366416	0.102813	0.276311	2.02768	3.01049e-05	0.000492911	2.73244	2.94983	4.74477	4.71749	4.88008	5.31093	5.01859	4.71626
109445	2.37842	0.00470573	0.0180235	-1.18474	0.0605088	0.218904	-0.221176	0.703741	0.816709	3.34198	0.000555424	0.00264336	-3.46527	-3.41824	-0.644418	-1.51133	-0.629976	-1.92747	-0.284117	0.0889822
10946	-0.460643	0.0323858	0.0697329	-0.0167108	0.926794	0.963143	0.174902	0.37136	0.562079	-0.26903	0.142434	0.192645	4.77886	4.87362	4.57211	4.13828	4.63413	4.44988	4.6256	4.48783
109471	2.43171	7.95143e-05	0.00187566	0.467484	0.165194	0.349789	-0.55803	0.091049	0.255902	1.4062	0.00234664	0.00759889	-0.429642	0.0411946	2.16294	2.31649	1.92022	1.44176	1.05469	1.36909
109472	-1.05948	0.00028569	0.00350023	-0.0130622	0.938008	0.967847	-0.384004	0.0537396	0.187994	-1.43042	5.10564e-05	0.000637457	5.77266	5.67927	4.76959	4.55476	4.40187	4.16705	4.17917	4.41434
109474	-1.11111	0.000365771	0.00399803	-0.000931626	0.995826	0.997845	-0.342296	0.0915007	0.256675	-1.45247	7.90878e-05	0.000797964	6.24175	5.98222	4.97029	5.03402	4.6971	4.62199	4.48329	4.83877
109476	1.7941	0.00521456	0.0180235	0.862575	0.0889441	0.239239	0.494694	0.289907	0.482973	1.42622	0.0148992	0.0294382	-5.78719	-5.74017	-4.10385	-3.83326	-3.43733	-3.51243	-4.37158	-4.30334
109478	0.737529	0.0316374	0.0684598	-1.19179	0.00590152	0.0619466	-0.829361	0.0276578	0.128563	1.09996	0.0058679	0.0154442	4.9917	4.45582	5.20676	5.71941	4.38922	4.86694	5.9379	5.70929
109482	3.55895	0.00405636	0.0179921	-0.539664	0.531249	0.711112	-1.25971	0.164672	0.368282	2.8389	0.012498	0.0280671	-5.78719	-4.1552	-1.78192	-1.0259	-3.43733	-1.92747	-1.56422	-2.71837
109485	0.0698867	0.664627	0.731763	1.19185	0.000265447	0.0150636	0.71128	0.00384962	0.047679	-0.410681	0.0374218	0.0624883	4.47608	4.36705	4.33494	4.6626	5.29399	5.11327	4.1082	3.91098
109487	3.1915	0.00168313	0.0100148	-1.21503	0.0610809	0.219856	-0.535723	0.385128	0.575618	3.87081	0.000413697	0.00217432	-2.08675	-0.454763	1.388	2.50659	1.51687	1.24245	2.61711	2.56703
109492	1.04038	0.00461249	0.0180235	0.107113	0.661671	0.808931	0.640049	0.0437028	0.165757	1.57332	0.00032775	0.0018682	2.70065	2.73151	3.87914	3.61795	4.18472	4.60131	4.55026	4.02309
109495	0.270309	0.706489	0.768352	-0.530295	0.489892	0.678111	0.188442	0.813711	0.887956	0.989045	0.169578	0.224151	-1.39488	-1.34785	-1.78192	-0.373828	-0.629976	-1.19051	-1.20165	0.451552
109497	-0.207012	0.263484	0.350998	0.270437	0.328955	0.532683	-1.08874	0.00328953	0.0446792	-1.56619	0.000182884	0.00130962	3.91151	3.77356	3.41185	3.88784	2.58504	2.50993	2.22833	2.32602
109500	0.630589	0.0303563	0.0664226	-0.667827	0.0233935	0.127792	0.814371	0.0104709	0.0785551	2.11279	6.96445e-05	0.000754334	5.39954	5.64192	5.8165	6.48076	6.94096	6.9904	7.68201	7.58427
109501	0.279459	0.102294	0.168574	-0.410304	0.0308692	0.15113	0.301961	0.0922877	0.258276	0.991724	0.000371636	0.0020255	4.52001	4.43101	4.57211	4.95138	5.09015	5.0244	5.49724	5.43712
109504	-1.69409	0.0519481	0.0996034	2.57061	0.0170682	0.10827	2.20776	0.0308305	0.136294	-2.05694	0.0261262	0.046412	0.0954492	1.33665	-1.78192	-0.132819	1.31756	1.13142	-1.20165	-1.49598
109505	-0.509885	0.184764	0.264811	1.19307	0.0331428	0.15645	0.464659	0.306761	0.500752	-1.2383	0.0140485	0.0294382	1.89229	2.30968	1.18155	2.04938	2.34403	1.77297	0.672815	1.05422
109508	-0.670021	0.26568	0.353215	-0.570767	0.512163	0.69712	-1.46407	0.111671	0.290205	-1.56332	0.0376799	0.0628753	1.03299	1.76287	0.754132	0.690303	0.46956	-1.92747	-0.123652	-0.215872
109512	0.218818	0.173608	0.25249	-0.562225	0.0105386	0.0838996	0.0515956	0.768862	0.858963	0.832639	0.000534992	0.00257799	3.36255	3.40449	3.73535	3.45214	3.65013	3.65749	4.12292	4.31137
109513	-0.683193	0.0432971	0.086732	0.231811	0.47901	0.66871	-0.118538	0.71325	0.823102	-1.03354	0.00813334	0.0200205	5.1796	4.55101	4.04488	4.33366	3.76234	4.35423	3.86204	3.79995
109514	-0.300689	0.206834	0.289835	-0.0687948	0.798669	0.893268	-0.0922501	0.740936	0.842267	-0.324145	0.159388	0.212448	3.60298	3.21112	3.19077	3.01223	3.10183	2.93051	3.26505	2.89634
109523	1.7941	0.00521456	0.0180235	0.862575	0.0889441	0.239239	0.494694	0.289907	0.482973	1.42622	0.0148992	0.0294382	-5.78719	-5.74017	-4.10385	-3.83326	-3.43733	-3.51243	-4.37158	-4.30334
109525	-0.108388	0.544586	0.625378	-0.0391615	0.838735	0.918632	0.0333473	0.866685	0.922022	-0.0358795	0.832082	0.861008	4.46429	4.16221	4.08103	4.34167	4.19929	4.27547	4.39991	4.15199
109528	2.38855	0.0270724	0.0610497	-0.288512	0.754113	0.868	-0.884592	0.348389	0.541033	1.79247	0.074964	0.112507	-3.46527	-4.1552	-0.644418	-2.2483	-3.43733	-1.19051	-2.04965	-1.98141
109531	0.675146	0.00700557	0.0224359	1.00966	0.000822116	0.0244099	1.12187	0.000610278	0.0218092	0.78735	0.0025741	0.00818446	3.41909	3.07586	3.97029	3.87064	4.99771	5.09156	4.15902	3.90904
109532	0.20927	0.788471	0.836625	0.874996	0.285494	0.489083	1.2934	0.145863	0.341876	0.627676	0.413967	0.47731	-4.20223	-4.1552	-4.10385	-3.83326	-3.43733	-1.92747	-4.37158	-2.71837
109533	-0.821113	0.0170307	0.0430948	-0.214143	0.512483	0.697333	0.0199506	0.953098	0.973738	-0.587019	0.0425773	0.0697602	3.06767	3.46685	2.27119	2.64247	2.71242	2.22633	2.54728	2.81561
109535	0.400804	0.1437	0.218386	-0.518074	0.175657	0.363749	-1.11203	0.0150103	0.0928788	-0.193148	0.463798	0.525426	3.29761	2.88554	3.44305	3.55045	1.92022	2.82742	2.9413	2.85654
109536	-0.457157	0.0177284	0.0443247	0.0943362	0.530769	0.710999	0.24555	0.134855	0.327361	-0.305943	0.0731428	0.110315	5.91628	5.71465	5.4679	5.24623	5.66333	5.54556	5.40814	5.61105
109537	0.0252337	0.928703	0.946626	-0.692761	0.0572206	0.211778	0.0683984	0.841528	0.906166	0.786394	0.0140956	0.0294382	0.278895	0.368359	0.288468	0.414668	0.650132	0.188006	0.913823	1.31137
109541	1.14062	0.000260897	0.00334618	0.955565	0.000574783	0.0211096	1.0058	0.000560034	0.0211127	1.19086	0.00015614	0.00118934	2.50282	2.48384	3.45839	3.83208	4.59609	4.68232	3.69988	3.66821
109543	-0.133432	0.594016	0.669959	-0.00438838	0.985857	0.992175	0.545644	0.0735788	0.226817	0.4166	0.106916	0.151416	4.6516	3.99962	4.29276	4.07963	4.82476	4.65247	4.70256	4.78147
109544	-0.52769	0.40577	0.495678	0.0635218	0.917385	0.960091	1.28033	0.0901818	0.25441	0.689118	0.246044	0.307774	-3.46527	-3.41824	-4.10385	-3.83326	-1.85237	-3.51243	-2.78662	-2.71837
109548	-0.546572	0.242122	0.329237	-0.0398249	0.948916	0.972204	-0.825012	0.201593	0.415536	-1.33176	0.0243693	0.0438919	1.20149	1.45951	1.2537	0.254204	0.263109	-0.342509	0.582617	-0.602895
109550	1.7941	0.00521456	0.0180235	0.862575	0.0889441	0.239239	0.494694	0.289907	0.482973	1.42622	0.0148992	0.0294382	-5.78719	-5.74017	-4.10385	-3.83326	-3.43733	-3.51243	-4.37158	-4.30334
109555	-0.0786474	0.919743	0.939901	1.53153	0.226862	0.424557	-1.24562	0.255586	0.482701	-2.8558	0.0217593	0.0399783	0.143543	0.325924	0.419713	-0.132819	-1.85237	-0.342509	-4.37158	-0.843904
109559	-0.0286052	0.879705	0.908318	0.203694	0.325993	0.530189	0.438043	0.0717461	0.223371	0.205744	0.268756	0.331665	4.09392	3.684	3.92406	3.78879	4.25616	4.33932	3.99911	4.19252
109562	1.08805	0.288818	0.377955	0.556097	0.6017	0.764357	0.0650409	0.95041	0.972142	0.596994	0.550212	0.608988	-3.0006	-1.47713	-1.27603	-1.0259	-1.51133	-0.67651	-2.99307	-0.276535
109566	-0.596625	0.121906	0.192443	0.617049	0.166756	0.351929	0.38849	0.364845	0.55661	-0.825184	0.0448099	0.0728184	-0.028038	-0.215349	-0.348962	-1.11079	-0.549806	-0.111896	-1.06415	-0.825658
109567	0.21908	0.617748	0.690268	0.221463	0.659071	0.807053	-0.205477	0.680834	0.802684	-0.20786	0.637101	0.68887	-1.70483	-1.73477	-1.68162	-1.30719	-2.29983	-1.12287	-2.00981	-1.8439
109568	0.166855	0.643251	0.713772	0.121935	0.780738	0.883379	-0.664907	0.154475	0.354204	-0.619987	0.128708	0.177035	-1.01109	-1.32063	-0.717038	-1.29721	-1.92132	-1.4081	-1.80112	-1.76728
109569	-0.735777	0.110574	0.178594	-0.0519524	0.911337	0.958558	0.458498	0.380448	0.57127	-0.225327	0.540463	0.600202	0.854641	0.920045	0.475089	-0.200991	0.233963	0.976852	0.23723	1.09925
109572	4.11258	6.56049e-05	0.00171977	-1.09361	0.0484693	0.193553	-1.82379	0.00548622	0.0573411	3.38241	0.000226013	0.00149209	-5.78719	-5.74017	-1.78192	-1.51133	-3.43733	-3.51243	-2.04965	-2.71837
109582	1.7941	0.00521456	0.0180235	0.862575	0.0889441	0.239239	0.494694	0.289907	0.482973	1.42622	0.0148992	0.0294382	-5.78719	-5.74017	-4.10385	-3.83326	-3.43733	-3.51243	-4.37158	-4.30334
109583	-0.115201	0.442339	0.53047	-0.760431	0.00241995	0.0413226	-0.102456	0.554772	0.712171	0.542774	0.00518044	0.0139737	4.03935	4.21258	4.06106	3.95464	3.92899	3.88845	4.79081	4.54529
109585	-0.810598	0.0174941	0.0439228	-0.0597656	0.850177	0.925464	-0.538476	0.122887	0.308276	-1.28931	0.00212408	0.00701715	5.23309	4.87362	4.51454	3.94153	3.89359	3.52099	3.56506	3.96813
109594	-0.367715	0.052814	0.100878	0.66649	0.00476695	0.0551745	1.02267	0.00080759	0.0245903	-0.0115305	0.93669	0.949588	3.67837	3.7007	3.13456	3.53306	4.32422	4.36408	3.61141	3.74651
109599	6.92722	3.49062e-06	0.000603826	2.23257	0.0014459	0.0316529	-1.37385	0.00316998	0.0438943	3.3208	0.000672446	0.00302082	-4.20223	-2.93281	3.15354	3.58459	1.92022	2.04215	-0.284117	-0.215872
109600	-0.705022	0.0142158	0.0378918	-0.952356	0.005794	0.0611646	-0.324385	0.22831	0.449095	-0.0770507	0.704531	0.748957	4.95848	4.94721	4.5364	3.92829	3.85729	3.98741	4.74995	5.00273
109601	1.2811	0.302362	0.392026	-0.616565	0.616241	0.775156	-0.16308	0.89987	0.942842	1.73458	0.150192	0.201788	-2.61727	0.190572	-0.644418	0.810597	-1.1154	0.879883	1.05469	-0.0554077
109602	1.12509	0.0002096	0.00297832	-1.47025	6.32643e-05	0.00787927	-0.256559	0.142978	0.338205	2.33879	2.89479e-06	0.000242508	3.91844	4.24994	5.28632	5.12964	4.8891	5.01504	6.46052	6.38579
109607	-0.350743	0.0542353	0.103049	0.0480714	0.760641	0.87231	-0.0729243	0.647751	0.778784	-0.471738	0.0176613	0.0336858	5.60136	5.51604	5.2559	5.15826	5.32309	4.95109	5.16175	5.01181
109608	-0.579723	0.0881208	0.150194	0.227081	0.529836	0.710017	0.310705	0.416775	0.605445	-0.496099	0.11058	0.155941	1.84216	2.08638	1.32242	1.45214	2.05452	1.34555	1.73694	1.18852
109609	-0.299154	0.247143	0.334646	0.113133	0.652642	0.802259	-0.0020258	0.993487	0.99599	-0.414313	0.127026	0.175099	6.26775	6.74007	5.9282	6.47394	6.11245	6.29008	6.00455	6.17138
109621	-1.13159	0.000430711	0.00438649	0.016704	0.946563	0.971051	-0.815857	0.0115748	0.0825312	-1.96415	2.82524e-05	0.000478936	4.16555	4.30286	3.05602	3.15543	2.53995	2.04215	2.3966	2.13961
109623	1.77183	0.0682244	0.122732	0.862575	0.357133	0.560076	-0.271304	0.756029	0.850822	0.637955	0.473233	0.534491	-5.78719	-4.1552	-4.10385	-2.2483	-3.43733	-3.51243	-4.37158	-4.30334
109624	1.7941	0.00521456	0.0180235	0.862575	0.0889441	0.239239	0.494694	0.289907	0.482973	1.42622	0.0148992	0.0294382	-5.78719	-5.74017	-4.10385	-3.83326	-3.43733	-3.51243	-4.37158	-4.30334
109628	1.68877	0.000354717	0.00394861	-0.805738	0.0172819	0.10872	-0.321526	0.275911	0.482973	2.17298	4.89159e-05	0.000627807	-0.577741	-0.185576	1.388	1.21113	0.954987	1.01113	1.85724	1.71903
109635	0.71743	0.0244204	0.056423	-0.0713848	0.773367	0.87948	0.652237	0.0466833	0.172589	1.44105	0.000471708	0.00236667	2.38773	2.97751	3.26247	3.55045	3.92899	4.16705	4.13225	4.11029
109638	-0.383743	0.0591298	0.110036	-1.4562	0.000174105	0.0122966	-0.8597	0.00288517	0.0417622	0.212761	0.248762	0.31062	5.70716	6.05709	5.65936	5.33416	4.67641	4.60131	6.12727	6.06189
109643	1.1004	0.0253832	0.0581746	1.27569	0.0162799	0.105321	0.885379	0.060988	0.202998	0.710094	0.107713	0.152402	-0.381202	-0.216603	0.419713	1.22852	1.31756	2.04215	0.535311	0.281627
109644	0.955597	0.000696643	0.00578258	-0.188027	0.246637	0.445634	0.63424	0.00786545	0.068157	1.77786	8.85665e-06	0.000322383	2.29496	2.19647	3.05602	3.36641	3.78184	3.88845	3.99036	4.05861
109645	-0.34977	0.117035	0.186406	-0.147495	0.527774	0.708686	-0.399526	0.121319	0.305563	-0.6018	0.0186373	0.0351874	4.96519	4.5487	4.55079	4.24889	4.07837	3.93878	4.04205	4.27031
109646	-0.882926	0.0219271	0.0519909	-0.227294	0.588805	0.754479	-0.547508	0.220322	0.439162	-1.20314	0.00535567	0.014362	3.40263	3.27664	2.92957	1.92163	1.65013	2.15999	2.18301	2.08898
109647	-0.329714	0.0278675	0.0622665	-0.0983814	0.453861	0.648234	0.00770967	0.953491	0.973972	-0.223623	0.0898416	0.130774	4.79683	4.74264	4.48487	4.39074	4.38922	4.50437	4.62277	4.46815
109650	-0.969758	0.000241467	0.00323111	0.302618	0.0573034	0.211888	0.242065	0.111447	0.290001	-1.03031	0.000166323	0.00123691	6.34112	6.251	5.19307	5.46366	5.64215	5.49599	5.25595	5.27598
109651	-1.13642	0.000245167	0.00324785	-0.798758	0.00731716	0.0689306	-0.9843	0.00285907	0.0417622	-1.32196	8.95429e-05	0.000846897	4.71763	4.65108	3.59242	3.49766	2.29059	2.82742	3.32191	3.40402
109652	3.567	0.000112762	0.00220666	0.385577	0.223027	0.420745	0.84472	0.0339005	0.14441	4.02615	4.21503e-05	0.000576296	-1.26363	-0.695771	2.16294	3.06156	3.35709	3.49879	3.11224	2.97279
109654	2.77267	0.00977995	0.0286112	0.862117	0.268323	0.469398	0.509036	0.498797	0.667973	2.41959	0.0175481	0.0335073	-4.78719	-5.74017	-3.10385	-1.83326	-1.43733	-2.51243	-3.37158	-2.30334
109655	-0.112542	0.568884	0.647179	0.304647	0.193254	0.386896	0.102068	0.646156	0.77755	-0.315122	0.135846	0.185065	4.17715	4.22128	4.00989	4.17237	4.49931	3.88845	3.94583	3.82079
109656	-0.345764	0.0457817	0.0905287	0.51699	0.0142336	0.0986596	0.036784	0.815837	0.889106	-0.82597	0.000966947	0.00392766	4.78835	4.80383	4.30129	4.61382	4.40187	4.56972	3.91844	4.02309
109657	-0.672483	0.0915591	0.154707	-0.183029	0.626984	0.783468	0.635302	0.165419	0.36912	0.145848	0.620867	0.674126	2.46547	3.23425	2.08598	2.27527	2.82946	2.79135	2.97715	3.00955
109660	1.23972	0.160548	0.237314	-0.778077	0.377596	0.58005	-0.475443	0.59481	0.740663	1.54235	0.08265	0.122093	-4.46527	-3.41824	-1.64442	-3.83326	-3.43733	-2.92747	-2.49974	-2.30334
109666	-0.0115041	0.924078	0.942879	-0.0264292	0.828864	0.913173	-0.120769	0.342649	0.535867	-0.105843	0.393897	0.45775	5.37205	5.52428	5.36579	5.50882	5.32089	5.31093	5.40485	5.27975
109667	-0.41078	0.2288	0.315101	0.843831	0.0792912	0.239239	0.0818815	0.83939	0.90481	-1.17273	0.0108481	0.025113	1.31084	0.82969	0.754132	0.559058	0.46956	1.01113	-0.284117	0.0889822
109675	0.292535	0.0917848	0.155006	0.538151	0.0101249	0.081822	0.268756	0.117129	0.29905	0.0231404	0.879176	0.901843	5.11141	4.72234	5.18386	5.23552	5.44837	5.50716	4.96604	4.91341
109678	1.10998	0.000407831	0.004244	0.335141	0.0843894	0.239239	0.434457	0.0406993	0.159646	1.2093	0.000208146	0.00141563	3.29229	3.42725	4.38399	4.56335	4.94205	4.86694	4.75512	4.37966
109683	-0.160674	0.244181	0.331462	-1.23433	0.000190411	0.0126846	-1.33083	0.000131002	0.0112735	-0.257174	0.0799055	0.118729	4.85756	5.00046	4.64769	4.89806	3.44531	3.43008	4.67554	4.66821
109685	0.313073	0.113445	0.182122	0.132642	0.588075	0.753949	-0.826985	0.00909743	0.0736238	-0.646555	0.0122853	0.0276831	3.53924	3.6798	3.73535	4.13253	3.24917	2.947	2.85724	3.0717
109688	1.7941	0.0338395	0.0720751	0.0762886	0.90849	0.956932	0.494694	0.481072	0.652402	2.21251	0.0127421	0.0284811	-5.78719	-5.74017	-4.10385	-3.83326	-3.43733	-3.51243	-4.37158	-2.71837
109689	-0.558154	0.00962044	0.0282804	0.217224	0.210823	0.409295	-0.37521	0.05164	0.183438	-1.15059	0.00023243	0.00151435	6.61555	6.44005	6.12617	5.816	5.55985	5.62967	5.2596	5.49595
109690	-1.05456	0.00751288	0.0236544	0.106671	0.7455	0.864247	0.462739	0.21926	0.43808	-0.698491	0.0256536	0.0457495	1.80526	1.59075	0.850347	0.414668	1.20653	1.01113	0.757703	1.25125
109693	-0.095724	0.526077	0.608868	0.512021	0.0150013	0.101219	0.453794	0.0275758	0.128371	-0.153951	0.30345	0.36824	4.03139	3.90981	3.91296	3.83208	4.24215	4.41238	3.67827	3.95876
109696	5.56551	1.07874e-05	0.000858392	0.974798	0.0127001	0.0930946	1.67969	0.000844298	0.0250685	6.27041	5.42227e-06	0.000266338	-0.577741	0.669226	5.33909	5.87237	7.1783	7.39069	6.47077	6.14891
109701	0.152256	0.659088	0.727203	-0.0592872	0.896156	0.9523	-0.72008	0.140489	0.335168	-0.508537	0.186125	0.242823	0.782662	0.469288	1.1056	0.414668	0.46956	-0.342509	0.0207379	0.220227
109702	5.06153	0.000240391	0.00323111	0.989477	0.0331683	0.15645	2.34546	0.00184242	0.0344433	6.41751	3.70314e-05	0.000536416	-5.78719	-4.1552	0.288468	-0.132819	2.44531	2.4183	1.81824	1.05422
109705	1.21924	0.00134255	0.00862005	0.287245	0.237924	0.435361	0.45525	0.0808153	0.238058	1.38724	0.00070121	0.00311602	4.81921	5.14782	5.89756	6.50325	6.63279	6.68355	6.4204	6.32146
109710	1.90882	0.130055	0.202391	-0.915714	0.406339	0.605769	-0.0362876	0.975571	0.98598	2.78824	0.0282725	0.0496632	-2.61727	-0.0122447	-0.196959	1.45214	-0.629976	1.69702	1.34706	1.57931
109715	1.7941	0.00521456	0.0180235	0.862575	0.0889441	0.239239	0.494694	0.289907	0.482973	1.42622	0.0148992	0.0294382	-5.78719	-5.74017	-4.10385	-3.83326	-3.43733	-3.51243	-4.37158	-4.30334
109717	0.0749453	0.655987	0.724585	0.452988	0.158685	0.340905	-1.56236	0.000650776	0.0225804	-1.9404	8.18745e-05	0.000810326	3.02979	2.87086	2.99418	3.06156	1.69195	1.24245	0.837874	1.18852
109718	-0.34079	0.063574	0.116491	0.131372	0.496717	0.683805	-0.357938	0.0928109	0.259012	-0.8301	0.00150568	0.00542789	4.6062	4.28912	4.12015	4.09155	3.76234	3.73549	3.72118	3.51045
109726	0.262233	0.539058	0.620463	0.262117	0.672121	0.81504	-1.19231	0.0696553	0.219222	-1.19219	0.0414979	0.0682163	0.362553	1.05425	1.1056	0.810597	0.263109	-0.705079	-0.912148	-0.0554077
109727	1.07286	0.017873	0.0445928	0.952071	0.0233068	0.127493	1.15759	0.0133036	0.08773	1.27838	0.00636494	0.0164623	-0.7428	-1.09631	0.419713	-0.132819	1.08623	1.53196	0.272277	0.451552
109728	0.298592	0.23399	0.320552	-0.10311	0.671095	0.814728	-0.350083	0.18034	0.389459	0.0516193	0.826706	0.856336	5.01936	5.45274	5.34117	5.73089	5.33416	5.03831	5.45019	5.12502
109736	1.00584	0.160867	0.237314	0.862575	0.235555	0.432751	0.494694	0.477962	0.651028	0.637955	0.35106	0.414468	-5.78719	-4.1552	-4.10385	-3.83326	-3.43733	-3.51243	-4.37158	-4.30334
109740	3.2599	0.000784889	0.00621249	0.177541	0.65517	0.803877	0.921322	0.0691196	0.218604	4.00368	0.000179593	0.00129681	-0.360929	1.02802	3.07606	4.16109	4.48748	4.52649	4.37325	4.28538
109744	-0.976086	0.250628	0.33806	2.01419	0.050339	0.197561	1.67847	0.0883256	0.251492	-1.3118	0.138064	0.187606	-2.61727	-1.83327	-4.10385	-2.2483	-1.1154	-1.92747	-2.78662	-4.30334
109746	-0.366716	0.246121	0.333641	-0.310699	0.463203	0.655615	-0.734848	0.110982	0.28917	-0.790866	0.0331524	0.0566185	1.48893	1.62616	1.02543	1.37619	0.0221008	0.879883	0.486401	1.05422
109754	-0.213234	0.35136	0.441363	-0.12824	0.636572	0.789826	-0.0475983	0.865444	0.921405	-0.132592	0.525222	0.58525	1.80526	1.85229	1.82689	1.37619	1.51687	1.61685	1.85724	1.52955
109771	0.948229	0.0700112	0.125078	0.95384	0.0705806	0.237377	0.898946	0.0891211	0.253033	0.893335	0.0785032	0.116995	-1.26363	-1.83327	-0.196959	-1.0259	0.0221008	0.575029	-0.464689	-0.843904
109772	-0.367645	0.593431	0.669362	2.02607	0.0178492	0.110388	2.44447	0.00958669	0.0753578	0.0507603	0.937874	0.950132	-3.46527	-3.74017	-4.10385	-3.83326	-1.1154	-1.92747	-4.37158	-2.71837
109775	0.29469	0.0938603	0.157774	0.354425	0.0710211	0.238388	0.397919	0.0561518	0.193038	0.338184	0.0524352	0.0831937	3.16409	3.19353	3.33078	3.63435	3.96355	3.78219	3.59996	3.43137
109776	-0.154513	0.704968	0.767116	0.583566	0.206156	0.403646	0.8223	0.112112	0.290906	0.0842209	0.819664	0.850645	3.01047	2.25419	2.86193	2.04938	3.40816	3.20181	2.9413	2.49108
109782	-0.499707	0.0195277	0.0477237	0.485947	0.0409455	0.174607	0.00147578	0.993924	0.996261	-0.984178	0.000827813	0.00352005	4.47373	4.24994	3.7227	4.01849	3.82006	3.90542	3.49261	3.25891
109784	0.176287	0.323674	0.413918	0.0322424	0.872524	0.938239	-0.191144	0.364367	0.556219	-0.0470992	0.780087	0.816908	3.97602	3.60635	3.96761	3.96764	3.6607	3.88845	3.71057	3.77881
109785	0.919776	0.0245264	0.0566132	-0.408501	0.273495	0.475588	-0.0596834	0.87399	0.926765	1.26859	0.00412102	0.0117124	2.18435	2.81826	3.22707	3.63435	3.70222	3.02672	3.90919	3.62148
109790	0.069058	0.836067	0.874226	0.250317	0.539377	0.716687	0.073603	0.857293	0.916494	-0.107656	0.740725	0.781793	2.91671	2.09904	2.52551	2.64247	2.67119	2.63731	2.3966	2.41091
109796	0.223964	0.0631408	0.115893	-0.0184201	0.858869	0.929585	0.131867	0.228011	0.448803	0.374251	0.00888013	0.0214431	5.91887	6.01012	6.15	6.22609	6.30582	6.33462	6.35037	6.32693
109798	-0.692032	0.0756973	0.132969	-0.0932932	0.796402	0.892052	-0.439435	0.250914	0.476744	-1.03817	0.017839	0.0339563	5.98306	5.80914	5.71792	4.67057	4.68679	4.84071	4.96604	4.74923
109804	-0.222756	0.348416	0.438126	0.398218	0.19312	0.386896	0.0892088	0.756063	0.850822	-0.531765	0.0486989	0.0779708	2.20716	2.08638	2.21808	1.59301	2.11726	1.91383	1.65079	1.57931
109805	1.7941	0.00521456	0.0180235	0.862575	0.0889441	0.239239	0.494694	0.289907	0.482973	1.42622	0.0148992	0.0294382	-5.78719	-5.74017	-4.10385	-3.83326	-3.43733	-3.51243	-4.37158	-4.30334
109808	0.152108	0.464547	0.551561	0.640879	0.0350735	0.161138	-0.117463	0.625614	0.762077	-0.606234	0.0250302	0.0448118	4.06923	3.63705	3.85615	4.17237	3.9973	3.78219	3.25047	3.24356
109813	-0.595694	0.469784	0.556318	1.19305	0.197854	0.392631	1.20873	0.201963	0.415984	-0.580009	0.469085	0.53056	-1.97984	-0.882184	-2.51889	-1.51133	-1.85237	0.188006	-2.04965	-1.98141
109816	-0.107711	0.329101	0.419182	-0.0891346	0.413457	0.612438	0.0996451	0.362443	0.554134	0.0810685	0.456256	0.518359	5.73293	5.73202	5.69219	5.55691	5.73009	5.71879	5.83909	5.7881
109819	-1.18476	0.00624392	0.020565	-1.0469	0.101285	0.259764	-2.44616	0.00288824	0.0417622	-2.58402	0.000252356	0.00158616	4.38898	4.60302	3.53278	3.06156	1.51687	0.231727	1.51106	2.32602
109821	2.60709	0.00322517	0.0153798	0.862575	0.186076	0.377203	-0.318293	0.588907	0.736736	1.42622	0.0481048	0.0772057	-5.78719	-5.74017	-2.51889	-3.83326	-3.43733	-3.51243	-4.37158	-4.30334
109835	-0.165124	0.443376	0.531316	0.0654865	0.765395	0.875334	0.309807	0.206906	0.422575	0.0791964	0.692502	0.738722	4.19722	4.56476	4.13932	4.30117	4.65543	4.40046	4.27588	4.64795
109839	-0.00300218	0.996883	0.997886	0.298532	0.664309	0.810596	2.05028	0.032672	0.141208	1.74875	0.0342141	0.0580085	-3.46527	-2.93281	-4.10385	-2.2483	-1.1154	-1.19051	-2.04965	-0.843904
109845	2.11456	3.40633e-06	0.000603826	-0.0157689	0.92306	0.961735	-0.623883	0.00607198	0.0601453	1.50645	3.09392e-05	0.000499874	1.61369	1.49824	3.7479	3.58459	3.00561	3.08748	3.06305	3.06299
109848	-0.662415	0.00346941	0.0161257	0.0880594	0.589822	0.755377	0.179766	0.305788	0.499642	-0.570708	0.00563632	0.0149567	4.83577	4.58963	4.12977	3.96116	4.32422	4.13862	4.1001	4.1845
109853	-0.611031	0.0535922	0.101989	0.194888	0.547355	0.721744	0.0708361	0.828807	0.898669	-0.735083	0.0239966	0.0433384	3.95932	3.66285	3.41185	2.96116	2.90252	3.62712	2.95934	3.19651
109857	0.0718451	0.893431	0.919548	0.0762886	0.913389	0.959618	-1.46736	0.0593395	0.199768	-1.4718	0.0383908	0.0638159	-1.8803	-2.28073	-1.78192	-2.2483	-3.43733	-3.51243	-4.37158	-2.71837
109863	1.4457	0.111459	0.179756	1.62761	0.0609061	0.219723	1.69049	0.0596016	0.200226	1.50857	0.0922866	0.133653	-2.97984	-1.09631	-0.196959	-1.0259	0.46956	1.69702	-0.67114	-0.396445
109867	0.815011	0.289125	0.378232	-0.80561	0.346696	0.551167	-0.720983	0.405556	0.594464	0.899638	0.234871	0.296157	-1.39488	-1.83327	-1.78192	0.254204	-1.85237	-1.19051	-1.20165	-0.215872
10987	-0.483713	0.00591956	0.0197584	0.0835381	0.510421	0.696034	0.0967753	0.446789	0.631435	-0.470476	0.00687567	0.0174836	6.38116	6.30594	5.98229	5.73849	5.94421	5.96937	5.83177	5.91462
109875	-2.05215	0.000311707	0.00367197	-0.178443	0.621825	0.779497	0.0399568	0.915967	0.952881	-1.83375	0.000341984	0.00192	4.67735	4.39554	2.49606	2.47052	2.49341	2.55366	2.28663	3.13129
109894	5.50199	0.000311434	0.00367197	2.73882	0.00127556	0.0300009	2.07233	0.00419337	0.0498226	4.8355	0.000696627	0.00309912	-5.78719	-2.93281	1.32242	0.921628	3.10183	3.30775	0.383308	0.554646
109900	2.57933	0.0113724	0.0320672	1.64821	0.0797477	0.239239	-0.301351	0.691144	0.809236	0.629769	0.45293	0.515205	-4.20223	-5.74017	-2.51889	-2.2483	-1.85237	-3.51243	-4.37158	-4.30334
109901	0.41456	0.537836	0.619355	0.862575	0.287016	0.490665	-0.318293	0.670624	0.795872	-0.766308	0.292473	0.356752	-4.20223	-2.93281	-2.51889	-3.83326	-3.43733	-3.51243	-4.37158	-4.30334
109906	1.43878	0.0064672	0.0211024	-0.664118	0.167021	0.352032	-0.741769	0.136264	0.32964	1.36113	0.00722809	0.0181845	-0.0323064	0.735568	1.51086	2.09748	0.954987	1.13142	1.9322	1.47802
109910	0.131022	0.383328	0.47366	-0.463965	0.0160048	0.10452	-0.0376336	0.79778	0.876904	0.557354	0.00690085	0.0175327	5.22053	5.43538	5.52368	5.39315	5.55985	5.28523	5.86563	5.9049
109912	-0.306669	0.229873	0.316284	0.15835	0.555495	0.728695	0.528743	0.1009	0.273404	0.0637243	0.766954	0.805345	2.52115	2.74767	2.19993	2.47052	2.58504	3.11692	2.84759	2.54215
109925	0.0173259	0.95106	0.963737	0.0477269	0.888783	0.947624	0.0131663	0.97012	0.982968	-0.0172347	0.948939	0.959388	1.167	1.29326	0.940545	1.59301	1.51687	1.01113	1.08785	1.34052
109932	-0.326642	0.091261	0.154312	0.28298	0.217491	0.416688	-0.0523948	0.807939	0.883676	-0.662017	0.00624945	0.0162513	3.05516	3.23425	2.69057	2.96116	2.62876	2.89696	2.4486	2.51684
109933	4.50186	3.33811e-05	0.00130989	0.423485	0.225337	0.423147	0.314577	0.367003	0.558245	4.39296	3.50416e-05	0.000523545	-3.46527	-2.28073	1.77879	1.45214	1.77212	2.10228	1.6057	1.42459
109934	-1.29383	0.00354511	0.0163439	-0.828284	0.0368018	0.165385	-0.561298	0.118422	0.301191	-1.02684	0.0108657	0.0251392	7.04747	7.21639	5.69219	5.98212	5.32089	5.2324	5.62701	6.58007
109938	1.59415	0.00132374	0.00853632	-0.876891	0.0223514	0.1249	0.602144	0.0798587	0.236642	3.07318	3.44987e-05	0.00051992	3.20999	4.14706	5.2559	5.28827	5.8318	5.91593	6.81144	6.69031
109939	-0.445654	0.0102869	0.0297227	-0.210789	0.134996	0.309094	0.20905	0.139656	0.333824	-0.0258145	0.838784	0.86694	5.56098	5.81298	5.21582	5.2674	5.39239	5.50716	5.64662	5.67538
109941	0.873398	0.00309794	0.015105	0.471833	0.0710901	0.238418	-0.0152423	0.945516	0.96931	0.386323	0.0849678	0.125068	2.88169	2.59968	3.73535	3.47962	3.68161	3.52099	2.95035	3.31137
109947	0.613094	0.43065	0.519007	-0.823874	0.281563	0.484814	0.491697	0.554656	0.712171	1.92866	0.0214455	0.0395216	-2.32776	-0.185576	-0.644418	-0.663334	0.0221008	-0.342509	0.672815	0.650861
109950	-0.21709	0.140812	0.214818	0.442128	0.0128908	0.0937629	0.322555	0.0447532	0.168403	-0.336662	0.0379266	0.0632075	5.37583	5.62123	5.26466	5.2986	5.66858	5.54013	5.0899	5.23388
109954	-0.814091	0.00293088	0.0145459	0.015027	0.940567	0.968562	-0.549049	0.0278089	0.128904	-1.37817	0.000185525	0.00131654	5.73293	5.62123	5.04336	4.67057	4.45141	4.18105	4.17917	4.42118
109960	-0.227935	0.209	0.292355	-0.745062	0.00493638	0.0563834	0.262364	0.23301	0.455438	0.779492	0.000960831	0.00391015	2.67633	2.59523	2.52551	2.27527	2.79149	2.55366	3.46762	3.362
109962	-0.0188145	0.903053	0.927333	0.205363	0.290804	0.49459	-0.249153	0.206206	0.421811	-0.473331	0.0189944	0.0357598	4.19437	3.91805	3.99944	4.07963	3.70222	3.87127	3.67827	3.48457
109969	-0.60969	0.412885	0.502314	-1.32823	0.130734	0.303116	-0.271304	0.750622	0.847548	0.447236	0.503591	0.564242	-2.61727	-2.57024	-4.10385	-2.2483	-3.43733	-3.51243	-2.78662	-1.49598
109970	-0.792982	0.13707	0.210725	-1.48013	0.0562151	0.20971	-1.64203	0.0410702	0.160266	-0.954873	0.0792007	0.117814	5.40201	5.15692	5.23377	3.66659	2.93771	2.75435	4.1082	4.54529
109971	-0.931947	0.120396	0.190565	-0.74396	0.287443	0.491119	-0.40065	0.567523	0.722709	-0.588637	0.269626	0.332533	0.516587	-0.0677398	-0.40341	-1.0259	-0.267406	-1.92747	-0.123652	-0.602895
109973	-0.529161	0.161815	0.238506	0.29303	0.447078	0.643395	0.177052	0.648294	0.77918	-0.645139	0.0919253	0.133259	5.06377	4.26124	4.45457	3.77407	4.41442	4.20867	3.90919	4.12712
109975	-0.224121	0.0801056	0.139095	-0.521841	0.00355082	0.0486414	-0.246971	0.0795736	0.236266	0.0507486	0.642422	0.69343	4.93305	4.90819	4.71313	4.67849	4.46354	4.43593	5.04838	4.89388
109978	1.821	2.95548e-05	0.00123337	0.448778	0.031211	0.152117	0.431517	0.0409102	0.160063	1.80374	2.53054e-05	0.000459317	2.03935	1.93931	3.96761	3.63435	4.15513	4.32677	3.87159	3.71347
109983	3.41518	0.0137043	0.0368714	0.387979	0.775604	0.88059	-2.81739	0.0469528	0.173346	0.209807	0.865165	0.889612	-4.9392	-1.85264	-0.759021	0.841427	-2.9519	-2.66444	-3.01544	-3.37734
109985	1.7941	0.00521456	0.0180235	0.862575	0.0889441	0.239239	0.494694	0.289907	0.482973	1.42622	0.0148992	0.0294382	-5.78719	-5.74017	-4.10385	-3.83326	-3.43733	-3.51243	-4.37158	-4.30334
109992	-1.63891	2.12179e-05	0.00108852	0.0037264	0.987795	0.993087	-1.67289	0.000192359	0.0131954	-3.31553	1.017e-06	0.000202977	5.44702	5.35721	3.82096	3.69812	2.34403	1.84512	2.00346	2.1724
109999	1.82058	0.132721	0.205629	1.64821	0.197179	0.391928	0.0868063	0.938103	0.964694	0.259176	0.824342	0.854343	-3.46527	-5.74017	-1.78192	-3.83326	-1.85237	-3.51243	-4.37158	-4.30334
110009	-0.703969	0.00474475	0.0180235	0.269202	0.373428	0.576482	-1.84029	0.000258492	0.0146135	-2.81346	9.47855e-06	0.000331551	4.86296	4.57612	4.04081	3.98692	2.44531	1.91383	2.00346	1.80519
110012	-0.863256	0.0121797	0.0337146	0.233466	0.492258	0.679796	-0.754491	0.0466913	0.172589	-1.85121	0.000387607	0.00208185	5.31937	4.86253	4.52186	3.90145	3.61795	3.33306	3.22088	3.25891
110013	0.300995	0.019589	0.0478343	0.00282035	0.97794	0.987585	-0.0358904	0.725569	0.831325	0.262284	0.0338048	0.0574697	6.32296	6.3463	6.67505	6.59657	6.58642	6.61298	6.62748	6.56626
110015	0.440392	0.0311107	0.0676142	-0.395863	0.0500224	0.196903	0.230447	0.224305	0.444291	1.0667	0.000346368	0.00193551	4.16846	3.88737	4.62066	4.30117	4.76724	4.63222	5.09806	5.09113
110016	4.91887	0.000746604	0.00602533	-1.36656	0.0805145	0.239239	0.584165	0.4494	0.632961	6.8696	7.21062e-05	0.000766251	0.782662	3.58402	7.49187	6.68539	7.5704	7.7747	9.15748	8.9184
110017	-0.779012	0.00120835	0.00813631	-0.22942	0.157852	0.33961	-0.0697139	0.647728	0.778784	-0.619306	0.00353344	0.0104085	5.73637	5.68032	5.05854	4.79245	4.91582	4.80498	4.98817	5.19052
110018	-0.690607	0.0445496	0.0886368	-1.55009	0.0124581	0.0921108	-1.97723	0.00399357	0.0484844	-1.11775	0.00650035	0.0167577	2.33693	2.54985	1.77879	1.72133	0.263109	-0.705079	0.985972	1.67394
110020	0.138244	0.338574	0.428367	0.357993	0.0424806	0.179423	-0.217984	0.167203	0.371716	-0.437732	0.0167243	0.0322543	5.16482	4.90279	5.13694	5.2084	5.03434	4.87558	4.66459	4.52639
110028	-0.89536	0.0536265	0.102038	0.328031	0.521765	0.70443	-0.132275	0.791998	0.873768	-1.35567	0.0112689	0.0258715	0.587846	0.859748	-0.40341	0.0736314	-0.267406	-0.342509	-1.20165	-0.0554077
110029	0.684523	0.172681	0.25137	-1.09859	0.0342441	0.159081	0.63405	0.239736	0.463365	2.41716	0.000422451	0.00220689	-0.699731	0.0927249	0.0660756	0.72133	0.691952	1.32046	1.91382	2.31137
110035	0.586771	0.0870386	0.148647	-0.179487	0.579482	0.747126	0.137404	0.681135	0.802727	0.903663	0.0160209	0.0311645	-1.45807	-1.41824	-0.966346	-0.728923	-0.805063	-0.624909	-0.44558	-0.625263
110036	4.52751	1.8297e-06	0.000497321	1.03048	0.00285177	0.0443791	-0.192887	0.401567	0.591085	3.30414	1.23929e-05	0.000347095	1.33175	1.75968	5.81054	6.32787	5.89582	5.86043	5.00563	4.68819
110040	-0.0576999	0.695398	0.758985	-2.43543	1.78777e-06	0.00164145	-0.905116	0.000749605	0.023992	1.47261	2.76772e-05	0.000477123	6.64509	6.8717	6.72857	6.67156	5.90474	5.68577	8.32691	8.13155
110043	0.29669	0.167428	0.245144	0.156831	0.445851	0.642436	0.695865	0.0105141	0.0786811	0.835723	0.0043688	0.0122466	6.17823	6.14744	6.17344	6.74133	7.19657	7.11419	7.06148	6.93567
110055	0.975268	0.169183	0.247172	0.862575	0.266663	0.467385	-0.271304	0.703572	0.816592	-0.15861	0.816283	0.84782	-4.20223	-4.1552	-4.10385	-2.2483	-3.43733	-3.51243	-4.37158	-4.30334
110057	0.628592	0.0855947	0.146727	0.798018	0.0465698	0.190102	0.451336	0.209641	0.426137	0.28191	0.391954	0.45607	4.31478	3.53828	4.83573	4.24889	5.1057	4.90963	4.30438	4.11029
110060	0.762461	0.038369	0.0792065	0.250033	0.596645	0.760133	-2.19281	0.00140958	0.0313894	-1.68038	0.0029929	0.00917391	-0.00583417	-0.185576	0.540007	0.810597	-1.1154	-1.92747	-2.04965	-1.49598
110062	-0.0171778	0.903856	0.927877	0.133413	0.367337	0.569717	0.209367	0.181323	0.390732	0.0587761	0.677424	0.725047	5.1619	4.98946	5.17924	4.93161	5.21731	5.31729	5.20774	5.0608
110065	-0.566528	0.0496745	0.096315	-0.0782866	0.787969	0.887869	0.030395	0.920447	0.95516	-0.457847	0.0764011	0.114262	3.44882	3.27943	3.15354	2.39556	2.86645	2.79135	2.99474	2.81561
110066	0.0146117	0.930089	0.947634	0.00141819	0.993977	0.996984	0.0361541	0.852991	0.913859	0.0493476	0.75626	0.795937	3.67019	3.92695	3.91519	3.69812	3.70631	3.98741	3.80534	3.89142
110073	-0.0313609	0.925884	0.944156	0.124698	0.726014	0.851331	0.664403	0.125414	0.31216	0.508345	0.120907	0.167847	1.33175	1.02802	1.45074	0.810597	1.51687	2.10228	1.89521	1.47802
110079	1.00871	0.00117359	0.00800455	0.584906	0.0158235	0.104183	0.703865	0.00859617	0.0716507	1.12767	0.000493157	0.00244376	2.8958	3.03791	3.80904	4.16109	4.73759	4.62199	4.25413	3.93028
110087	0.20203	0.356568	0.446824	0.0644158	0.762597	0.873547	0.235431	0.288296	0.482973	0.373044	0.116192	0.162359	6.33919	5.82732	6.45553	6.11948	6.46956	6.5737	6.52248	6.39189
110092	0.527076	0.0240829	0.0558378	-0.03999	0.830116	0.913669	0.690592	0.00822645	0.069837	1.25766	0.000335655	0.00189696	6.20326	6.26089	6.49699	7.01849	7.45065	7.44858	7.5536	7.42501
110093	-0.688093	0.0981133	0.16349	0.361493	0.371116	0.57416	-0.1582	0.687923	0.806983	-1.20779	0.0134699	0.0294382	7.57105	6.74793	6.85543	6.09896	6.28206	6.3502	5.75125	6.15712
110094	-1.26118	0.0644426	0.117706	-0.722491	0.383271	0.585348	-1.25971	0.14841	0.345778	-1.7984	0.0191058	0.0359355	-0.295341	-0.0122447	-1.78192	-1.0259	-3.43733	-1.92747	-1.20165	-2.71837
110098	0.196712	0.346712	0.436492	-0.794653	0.00570887	0.060786	0.51749	0.0587616	0.198766	1.50886	5.8258e-05	0.000682993	1.91325	2.2822	2.236	2.35657	2.8106	2.80949	3.58262	3.6274
110100	-0.855912	0.00186576	0.0107324	-0.22093	0.38205	0.584094	-0.602694	0.040901	0.160063	-1.23768	0.000250834	0.00158049	2.9509	2.89283	2.12497	1.99963	1.69195	1.24245	1.69451	1.67394
110101	0.936315	0.0119712	0.0333071	0.293573	0.307991	0.51108	0.610331	0.0605032	0.201893	1.25307	0.00296538	0.00911061	4.30688	4.33264	5.63593	4.86371	5.80822	5.92428	5.7718	5.37438
110104	-0.951081	0.158519	0.235334	0.256054	0.802696	0.896005	-1.41315	0.162159	0.364713	-2.62028	0.0105915	0.0246241	1.87814	2.49345	1.82689	0.559058	-1.1154	0.735494	-1.20165	0.340521
110108	-1.71402	0.185605	0.265728	1.22702	0.52576	0.707276	-1.25916	0.466629	0.643267	-4.20021	0.0246857	0.044367	-0.172484	1.48865	-2.51889	0.488669	-1.1154	-3.51243	-4.37158	-2.71837
110120	1.7941	0.00521456	0.0180235	0.862575	0.0889441	0.239239	0.494694	0.289907	0.482973	1.42622	0.0148992	0.0294382	-5.78719	-5.74017	-4.10385	-3.83326	-3.43733	-3.51243	-4.37158	-4.30334
110121	2.74683	0.0108081	0.0308486	-1.12253	0.260643	0.461646	-2.3144	0.0370498	0.150993	1.55497	0.0986745	0.14156	-3.46527	-2.03973	-0.40341	0.414668	-1.1154	-3.51243	-0.912148	-1.49598
110131	1.7941	0.042181	0.0851708	0.800385	0.189438	0.381883	2.81628	0.00390714	0.047979	3.81	0.000825086	0.00351597	-5.78719	-5.74017	-4.10385	-3.83326	-1.1154	-1.19051	-1.20165	-2.71837
110137	0.825376	0.0033764	0.0158042	0.608584	0.0159922	0.10452	0.562685	0.024667	0.120864	0.779477	0.00380014	0.011012	3.1465	3.27943	3.82096	4.28048	4.66596	4.53741	4.1001	3.88154
110151	3.2069	0.0129085	0.0352259	-2.88793	0.000394942	0.0182738	3.05669	0.00270255	0.0406761	9.15151	2.16373e-05	0.000427599	-2.97984	0.409582	2.12497	1.65859	5.18105	4.74966	7.87901	7.82176
110152	-0.527865	0.392845	0.482805	-2.04347	0.0120358	0.0902953	0.355297	0.635205	0.768916	1.8709	0.00319716	0.00965621	1.63066	2.58626	0.850347	2.39556	2.34403	1.53196	3.99911	3.94933
110159	-0.160779	0.325712	0.416019	0.121775	0.458128	0.65183	0.0551751	0.734713	0.837987	-0.22738	0.176145	0.231371	5.33628	5.00214	5.1129	4.89806	5.05051	5.07628	4.88581	4.99816
110165	-0.0918873	0.486321	0.572177	0.568374	0.00658846	0.0656398	0.0725435	0.623467	0.760546	-0.587718	0.00312537	0.0095019	4.24485	4.18613	4.24045	3.99329	4.15513	4.23576	3.58842	3.66821
110168	0.189256	0.382206	0.472616	0.400396	0.132389	0.30541	0.324966	0.219602	0.438543	0.113827	0.576216	0.633482	2.20716	2.5313	2.37188	2.76665	2.86645	2.89696	2.42284	2.54215
110171	-0.307013	0.353123	0.443344	-0.355176	0.294109	0.498011	0.678856	0.0670606	0.214652	0.727019	0.0562484	0.088421	6.00519	6.22381	5.32032	6.29215	6.48302	6.48897	6.72184	6.96052
110172	-0.101057	0.543096	0.623847	0.193435	0.343339	0.547771	-0.0123843	0.950477	0.972142	-0.306876	0.0911069	0.132197	3.50972	3.32861	3.34736	3.28568	3.33085	3.28198	2.9413	3.28912
110175	0.469159	0.00781093	0.0242853	0.806101	0.00108639	0.0281644	0.304522	0.0695366	0.21911	-0.0324197	0.80273	0.836145	3.01694	2.99793	3.396	3.56762	3.74258	3.81848	2.95934	2.99129
110177	-1.95113	0.000202798	0.00292944	-1.28786	0.0131898	0.0951261	-1.17045	0.022436	0.115527	-1.83372	0.000179088	0.00129467	3.46073	3.62397	1.32242	1.89466	0.263109	0.575029	1.46131	1.96345
110182	2.52775	0.0116756	0.0326447	-0.308339	0.688339	0.825647	-0.673056	0.393079	0.582671	2.16303	0.0223411	0.0408429	-4.20223	-4.1552	-1.78192	-1.51133	-1.1154	-3.51243	-2.04965	-1.98141
110191	-0.165101	0.546588	0.627049	0.178644	0.591579	0.756791	0.0565295	0.867177	0.922269	-0.287215	0.290132	0.3544	2.02659	1.80673	2.08598	1.37619	1.77212	1.84512	1.46131	1.80519
110193	0.0180717	0.929446	0.947142	-0.218114	0.329563	0.53337	-0.0908186	0.674582	0.798553	0.145367	0.485281	0.546548	7.18847	6.62315	6.96157	6.8904	6.80227	6.86803	7.01266	7.0938
110195	0.0492323	0.684836	0.749721	0.0262501	0.830155	0.913669	0.208148	0.131119	0.321164	0.23113	0.0853443	0.125545	4.90368	4.71619	4.88767	4.82852	5.12872	5.0072	5.06096	5.02085
110199	-0.662984	0.00065857	0.00558361	-0.435634	0.0168814	0.10781	-1.02489	0.000203096	0.0133471	-1.25224	1.86529e-05	0.00040629	5.08548	5.15086	4.4622	4.44751	3.50518	3.35793	3.89988	3.83109
110200	0.184761	0.203453	0.286134	-0.0530527	0.771946	0.879057	-0.658906	0.00792087	0.0684107	-0.421092	0.0193091	0.0362436	3.08008	3.17571	3.41185	3.20016	2.62876	2.67739	2.70524	2.70789
110204	2.09397	0.0370313	0.0770984	2.11028	0.0294715	0.14637	1.49947	0.0863392	0.248025	1.48316	0.112399	0.157971	-4.78719	-5.74017	-4.10385	-2.17333	-1.62998	-1.70508	-3.26055	-4.30334
110207	1.19305	0.142998	0.217512	-0.289116	0.748078	0.865819	-1.46736	0.125429	0.31216	0.0148103	0.984845	0.987907	-3.46527	-2.93281	-1.78192	-2.2483	-3.43733	-3.51243	-4.37158	-1.98141
110210	-0.00893584	0.942509	0.95693	0.53336	0.00568312	0.060622	-0.124004	0.364697	0.556511	-0.6663	0.00136428	0.00508083	4.97519	4.78829	4.88767	4.85674	4.77699	4.72119	4.13225	4.30029
110211	0.194955	0.131576	0.204332	0.588509	0.00172747	0.0352214	0.37059	0.0160337	0.0962184	-0.0229631	0.843726	0.870868	4.94921	4.82589	5.04844	5.11803	5.39239	5.51271	4.92074	4.8078
110233	0.151477	0.691968	0.756142	-0.0324312	0.933059	0.96558	0.462717	0.280942	0.482973	0.646626	0.106532	0.15091	3.82752	4.35787	3.69705	4.84974	4.72758	4.68724	4.66184	4.8182
110234	-0.482093	0.280846	0.369182	0.119532	0.823714	0.910188	-0.336216	0.534759	0.697888	-0.937842	0.0617033	0.0957102	-0.232605	0.409582	-0.644418	-0.132819	-0.267406	-1.19051	-0.912148	-0.792373
110235	-1.04706	0.00966542	0.0284014	-0.356998	0.485396	0.674234	-2.08022	0.00310954	0.0433592	-2.77028	0.000163201	0.0012236	1.86386	2.08638	1.2537	0.559058	-1.1154	-1.19051	-0.464689	-1.13341
110239	-0.495541	0.0301808	0.0661229	0.278803	0.170878	0.357323	0.0897524	0.63448	0.768432	-0.684592	0.00791047	0.019581	6.58866	6.28809	6.10194	5.78696	6.16815	5.89908	5.67145	5.83749
110247	-0.506416	0.123736	0.19479	-0.409684	0.424243	0.621702	-1.64468	0.0100525	0.076522	-1.74141	0.00172737	0.0059953	2.6516	2.40449	2.236	1.78145	-0.267406	1.01113	0.672815	0.906118
110249	0.920071	0.00155203	0.00947572	0.508478	0.022187	0.124389	0.798931	0.00388945	0.0479591	1.21052	0.000244892	0.00155885	2.99088	3.07682	3.88484	4.03093	4.71749	4.78677	4.45179	4.03206
110253	0.295717	0.107499	0.175105	0.209585	0.244032	0.442133	0.382975	0.0631816	0.207052	0.469107	0.0197518	0.0368658	4.00885	3.99285	4.11047	4.50213	4.6971	4.66249	4.57971	4.35844
110254	0.586641	0.0148064	0.0389556	0.143317	0.446463	0.642743	0.732097	0.00560222	0.0579949	1.17542	0.000484643	0.00241835	5.72209	6.1421	6.36477	6.66957	7.26917	7.23156	7.12777	7.0863
110258	0.720149	0.00579129	0.0194827	0.208533	0.272701	0.474637	0.712855	0.00581945	0.059149	1.22447	0.000377826	0.00204802	4.61901	4.85509	5.59832	5.31395	5.99938	6.34088	5.90338	6.01972
110260	0.213214	0.324477	0.41462	0.223071	0.380622	0.582524	-0.0139754	0.955178	0.974778	-0.0238329	0.907132	0.925351	3.20433	3.36574	3.22707	3.80337	3.35709	3.60651	3.3079	3.21236
110267	-0.392659	0.0647871	0.118207	-0.268811	0.224656	0.422483	-0.268838	0.235731	0.45848	-0.392686	0.0575429	0.0901236	4.37394	4.75069	4.24045	4.09155	4.06252	3.74495	4.13225	4.20842
110271	-0.493245	0.0602173	0.111556	0.0787622	0.752678	0.867429	-0.0819282	0.746863	0.845983	-0.653936	0.0202812	0.0376581	4.51087	4.99031	4.06106	4.47508	4.19929	4.1529	4.18684	4.005
110276	-0.398427	0.588574	0.665104	1.66128	0.0675807	0.232797	1.2934	0.133503	0.324836	-0.766308	0.31468	0.379511	-4.20223	-2.93281	-4.10385	-3.83326	-3.43733	-1.92747	-4.37158	-4.30334
110280	0.750051	0.309423	0.399057	0.58759	0.479412	0.669071	-0.219678	0.782241	0.867815	-0.0572163	0.937393	0.949887	-0.501792	-2.03973	-0.644418	-0.373828	-0.267406	-1.19051	-0.67114	-1.98141
110286	-1.3843	0.000847326	0.00651644	-0.679522	0.0975396	0.253673	-1.28679	0.00900721	0.0732805	-1.99156	0.000136783	0.00109353	4.44283	4.38525	3.26247	2.76665	2.05452	1.44176	2.16758	2.68535
110287	-0.983188	0.0124692	0.0343643	-0.433851	0.196545	0.390994	-0.222354	0.482098	0.653288	-0.771692	0.0339621	0.0576877	7.09067	6.71747	6.32137	5.52649	5.74009	5.65999	5.92877	6.33781
110289	0.433772	0.113653	0.182359	0.196577	0.470967	0.661737	0.116614	0.671432	0.796324	0.353809	0.171544	0.226398	4.08779	3.53828	4.33494	4.14973	4.35057	4.37631	4.37996	3.94933
110293	2.00038	0.0127895	0.0349959	-0.912608	0.103858	0.26342	0.789761	0.197026	0.410133	3.70275	0.000320256	0.00184225	0.622197	2.48384	3.19077	3.94153	4.34009	4.32677	5.22349	5.26842
110299	2.48671	0.000627018	0.00540782	0.511594	0.300244	0.503967	-0.753369	0.118937	0.302179	1.22175	0.0281605	0.0494955	-1.53927	-0.454763	1.388	1.59301	0.650132	0.809494	0.486401	-0.0554077
110302	1.12512	0.0272398	0.0612883	-0.114516	0.751734	0.867219	1.3458	0.0125602	0.0848437	2.58543	0.000270054	0.00166153	-2.97984	-2.57024	-1.78192	-1.51133	-0.267406	-0.342509	-0.464689	0.0889822
110304	0.569623	0.0762593	0.133759	0.841965	0.02443	0.131592	0.763477	0.0394653	0.157281	0.491135	0.104222	0.148148	1.64743	1.29326	1.72904	2.39556	2.93771	2.67739	2.03781	1.88649
110307	-0.427423	0.228802	0.315101	-0.601859	0.247489	0.446229	-1.03083	0.0693633	0.218918	-0.856399	0.0368571	0.0616819	2.77886	2.38396	2.33909	1.9481	1.69195	0.575029	1.46131	2.00045
110308	-0.0524981	0.79491	0.842184	0.157237	0.460463	0.653674	0.375642	0.121144	0.305315	0.165907	0.399749	0.463423	4.42348	4.16522	4.45457	4.00594	4.61252	4.62199	4.60284	4.31505
110309	0.359453	0.0181868	0.045187	0.108602	0.396813	0.597083	0.272627	0.0689614	0.218386	0.523477	0.00252814	0.00806409	3.82198	3.89101	4.18617	4.24889	4.57948	4.40046	4.35974	4.40057
110322	-0.0691451	0.706706	0.768447	-0.0867476	0.668066	0.812548	0.0582706	0.7809	0.866892	0.0758731	0.664128	0.712606	3.93902	4.28636	3.87914	4.22744	4.09405	4.10962	4.22461	4.15199
110329	1.1824	0.0396221	0.0811908	-0.257028	0.585867	0.752168	0.366986	0.482139	0.653288	1.80641	0.00413002	0.0117232	-1.03231	0.0411946	0.288468	1.12094	1.08623	1.01113	1.24313	1.36909
110340	0.0163667	0.901329	0.926159	-0.0720824	0.629536	0.785177	-0.133018	0.394625	0.584252	-0.0445688	0.728869	0.770779	4.23933	4.19794	4.34323	4.11511	4.09405	4.10962	4.26142	4.08468
110345	-1.33444	0.00026294	0.00336022	0.00316329	0.987807	0.993087	-0.407071	0.0850353	0.246114	-1.74467	5.72276e-05	0.000675636	6.31904	6.1375	5.01768	4.76293	4.60159	4.37631	4.28306	4.68819
110352	-0.226379	0.0556161	0.104971	-0.11799	0.349368	0.552911	-1.146	4.27523e-05	0.0080245	-1.25439	1.22396e-05	0.000346189	8.60403	8.56232	8.32713	8.38898	7.30498	7.11661	7.26202	7.39624
110355	-0.623246	0.00143927	0.00900846	-0.0508851	0.670989	0.814728	0.491627	0.00475683	0.0535637	-0.0807338	0.505652	0.566285	5.83824	5.86021	5.18847	5.26477	5.82711	5.6091	5.74346	5.79338
110358	0.444991	0.0173692	0.0437198	0.318552	0.0677746	0.232943	0.471759	0.0167302	0.0981287	0.598198	0.00445988	0.0124377	6.92031	6.64435	7.14328	7.31353	7.61501	7.78506	7.39336	7.36953
110362	0.307947	0.0958872	0.160475	0.480184	0.0206541	0.12067	0.00490877	0.97582	0.986064	-0.167328	0.32508	0.389948	6.05201	5.76465	6.28309	6.15116	6.37485	6.06813	5.76925	5.71347
110383	1.09106	0.00135514	0.0086497	0.780875	0.00995249	0.0811332	0.229569	0.31369	0.508287	0.539749	0.0351809	0.059319	3.36001	3.63705	4.34323	4.85674	4.88008	4.75903	4.12428	3.94933
110388	-1.11115	0.0167154	0.0425109	-1.06331	0.0459676	0.188763	-1.07627	0.0472742	0.17406	-1.12411	0.013827	0.0294382	5.40325	5.55618	4.92129	3.7592	3.10183	3.47625	4.35974	4.3513
110390	-0.613116	0.0301921	0.0661344	0.144755	0.55041	0.724277	0.147647	0.540612	0.702479	-0.610224	0.0314079	0.0541584	6.95533	6.74365	6.58702	5.89296	6.35871	6.41089	6.21056	6.26937
110391	0.481558	0.0563959	0.106124	0.476666	0.0618834	0.221461	0.117306	0.595189	0.740944	0.122197	0.572553	0.629861	4.89317	4.5042	5.40593	4.94482	5.23863	5.35484	4.72382	4.91825
110394	-0.212549	0.318638	0.408601	0.696855	0.018336	0.112235	0.586256	0.0396687	0.15772	-0.323148	0.135868	0.185065	3.44882	3.21112	3.27985	2.93493	3.89359	3.52099	3.09603	2.91583
110400	0.948244	0.0190206	0.0468297	0.0906151	0.778804	0.88229	0.221952	0.50664	0.673488	1.07958	0.00999371	0.0235601	6.4091	7.09963	7.36732	8.04211	7.96834	7.87612	7.95906	7.70194
110402	0.83202	0.00127509	0.00839163	-0.122188	0.449236	0.644814	0.145153	0.379023	0.569631	1.09936	0.000259508	0.00161749	4.09392	4.43101	5.1746	5.01116	5.23155	5.24799	5.4406	5.2835
110404	1.7941	0.00521456	0.0180235	0.862575	0.0889441	0.239239	0.494694	0.289907	0.482973	1.42622	0.0148992	0.0294382	-5.78719	-5.74017	-4.10385	-3.83326	-3.43733	-3.51243	-4.37158	-4.30334
110407	1.7941	0.00521456	0.0180235	0.862575	0.0889441	0.239239	0.494694	0.289907	0.482973	1.42622	0.0148992	0.0294382	-5.78719	-5.74017	-4.10385	-3.83326	-3.43733	-3.51243	-4.37158	-4.30334
110415	0.125302	0.395172	0.485313	0.326476	0.0690352	0.235497	0.396494	0.0419252	0.162263	0.195321	0.181653	0.237847	3.56375	3.5659	3.58964	3.80337	3.94637	4.22228	3.76285	3.75736
110416	0.476665	0.136121	0.20959	0.618717	0.0991235	0.256479	0.3383	0.332819	0.526317	0.196248	0.500747	0.561529	0.587846	0.918046	1.32242	1.12094	1.20653	1.91383	0.913823	0.982067
110423	0.591976	0.0177584	0.044371	0.612673	0.0230164	0.127069	-0.731681	0.00920245	0.0738175	-0.752378	0.00759496	0.0189374	4.73539	5.16597	5.56326	5.52209	4.93336	4.69214	4.04205	4.35844
110430	4.35025	5.45293e-06	0.000637427	5.01602	1.65534e-06	0.00164145	1.84772	0.000100768	0.0101073	1.18196	0.0170165	0.0327023	-2.97984	-3.41824	1.02543	1.29602	3.0384	2.9633	-2.04965	-1.98141
110439	-0.208038	0.12518	0.196433	0.143639	0.294259	0.498036	0.222781	0.124336	0.310605	-0.128897	0.313087	0.377943	7.12476	7.034	7.00663	6.73755	7.09308	7.09582	6.91671	6.98495
110442	-0.128746	0.745898	0.801498	-0.579461	0.310881	0.514087	-1.08492	0.0804971	0.237531	-0.634204	0.151663	0.203403	0.622197	1.37878	1.02543	0.690303	-0.629976	0.188006	0.383308	0.340521
110443	0.71041	0.452861	0.540427	0.496519	0.663638	0.81002	-0.8923	0.418485	0.606635	-0.678409	0.502935	0.563771	-2.08675	-2.93281	-2.51889	-1.0259	-1.85237	-3.51243	-4.37158	-1.98141
110449	-0.551375	0.0828676	0.142935	0.233707	0.485889	0.674604	0.111062	0.742796	0.843274	-0.674019	0.0382745	0.0636984	4.04728	3.52896	3.45839	2.98692	3.19203	3.49879	2.95934	3.27409
110453	-0.13964	0.833545	0.872813	-0.926951	0.345451	0.549948	-1.3613	0.178859	0.387453	-0.573993	0.410991	0.474382	1.00722	1.08001	-0.196959	2.14402	-1.1154	0.188006	0.486401	0.451552
110457	-0.137943	0.432217	0.520527	-0.257623	0.218766	0.418198	-0.136559	0.510974	0.677016	-0.01688	0.916723	0.933618	3.90106	4.07201	3.90178	3.78879	3.63948	3.78219	4.1559	3.77881
110463	1.77692	0.0353278	0.0743297	-1.46241	0.0618962	0.221461	-0.16385	0.827308	0.897704	3.07548	0.00162358	0.00575729	0.479593	1.77553	2.0459	3.86023	2.71242	2.75435	4.33923	4.04981
110467	-1.35037	0.000282854	0.00349051	-1.06454	0.00319426	0.0466337	-0.838911	0.011626	0.0827974	-1.12474	0.000540672	0.00259882	5.3298	5.17646	4.07108	3.71364	3.07046	3.05742	3.94583	4.31505
110469	0.497065	0.0215773	0.0514373	-0.285706	0.146867	0.325076	0.0320348	0.863464	0.92037	0.814806	0.00178688	0.00615889	4.10307	3.86531	4.4622	4.50213	4.51104	4.51547	4.98377	4.61254
110472	-0.00515759	0.965304	0.974447	0.0760706	0.525036	0.70703	0.336564	0.0240972	0.119396	0.255336	0.063341	0.097692	5.3272	5.2549	5.22931	5.34416	5.68937	5.55634	5.60999	5.48293
110477	-0.271815	0.253158	0.340665	-0.435111	0.127555	0.298284	0.062984	0.821244	0.893318	0.226279	0.278244	0.341504	3.38022	2.92872	2.83867	2.93493	3.07046	2.82742	3.3079	3.45822
110487	0.30999	0.211599	0.29519	-0.639573	0.0272043	0.140143	0.63401	0.0281626	0.129938	1.58357	0.000345082	0.00193194	5.58839	6.1865	6.00337	6.38712	6.8353	6.8263	7.49028	7.4503
110488	-0.181546	0.243043	0.330217	-0.702125	0.00369128	0.0492281	-0.00491775	0.977561	0.987405	0.515661	0.00577272	0.0152465	3.87992	3.75769	3.68405	3.58459	3.59609	3.66748	4.45814	4.20842
110493	-0.643501	0.00738679	0.0233683	0.701295	0.0105648	0.0839577	0.48928	0.0467044	0.172589	-0.855516	0.00159488	0.00568424	3.19865	3.31783	2.74164	2.47052	3.24917	2.9633	2.4486	2.35488
110495	0.672639	0.0245019	0.0565786	-0.0589994	0.81668	0.905265	0.261149	0.354235	0.546613	0.992787	0.00285745	0.00887267	1.82014	2.3473	2.69057	2.82495	2.95499	3.07253	2.98597	3.16427
110499	0.555715	0.476269	0.562456	0.316102	0.708128	0.838411	0.114618	0.892479	0.938641	0.354231	0.641671	0.692807	-1.03231	-1.49224	-0.40341	-1.0259	0.0221008	-1.19051	0.151982	-1.98141
110500	-0.320269	0.0394914	0.0809914	-0.29924	0.0890324	0.239239	-0.598014	0.00657635	0.0624704	-0.619042	0.00207682	0.00691461	4.64012	4.53013	4.31822	4.20566	3.52845	3.80045	3.95485	3.97744
110504	1.09027	0.000197591	0.00287615	1.06188	0.0001812	0.0125017	1.18047	0.000126348	0.0112544	1.20887	8.57467e-05	0.000827383	3.09239	3.2285	4.17692	4.33165	5.40502	5.45623	4.4957	4.2397
110515	-0.214648	0.310598	0.4004	-0.178945	0.409955	0.60952	0.355936	0.152409	0.351221	0.320233	0.118678	0.16529	4.18865	3.95506	4.04081	3.65056	4.35057	4.08002	4.52627	4.25509
110517	0.448267	0.0142032	0.0378753	-0.0775929	0.597517	0.760905	0.379233	0.0436024	0.165666	0.905093	0.000240902	0.00154554	3.04253	3.20528	3.47358	3.68244	3.96355	3.93878	4.01644	4.04096
110520	1.73091	0.00245366	0.0129646	-1.32416	0.00409238	0.0514717	0.739516	0.0756787	0.230025	3.79458	1.32008e-05	0.000356482	6.80269	7.75981	8.66413	9.38258	9.74646	9.7501	11.0999	11.0444
110526	1.59096	0.0292853	0.0645281	-0.993795	0.0517721	0.200179	1.6334	0.0209627	0.111689	4.21815	7.61993e-05	0.000782042	-2.61727	-2.03973	-0.0163865	-1.51133	0.650132	1.13142	1.96827	1.80519
110533	0.376777	0.160348	0.237314	0.113325	0.668022	0.812548	0.176525	0.521105	0.685746	0.439977	0.100101	0.14333	4.01855	3.85416	3.96761	4.69422	4.64482	4.33932	4.37996	4.37262
110537	1.1761	0.015523	0.0403754	0.173804	0.702077	0.834162	-0.429659	0.35006	0.542307	0.57264	0.166579	0.220798	0.899307	1.57272	2.81501	1.9481	2.11726	1.84512	1.9322	1.67394
110538	4.52781	3.92616e-05	0.00142008	0.328742	0.321807	0.525889	0.204508	0.532	0.695352	4.40358	4.45679e-05	0.000594469	-0.295341	0.859748	4.4469	5.18633	5.00146	5.01504	4.77563	4.58236
110545	-0.157641	0.727208	0.786441	-0.171481	0.696493	0.830628	1.02181	0.0792352	0.235789	1.03565	0.0258722	0.0460705	0.0456961	0.190572	0.540007	-0.663334	1.08623	0.879883	0.837874	1.47802
110553	0.818765	0.000444844	0.00447268	0.112128	0.39153	0.592683	0.418776	0.0145822	0.0915587	1.12541	6.23259e-05	0.000711104	4.07544	3.94809	4.80604	4.85674	5.26657	5.2324	5.24864	5.02534
110562	0.276645	0.129346	0.201625	0.280903	0.125853	0.295822	0.0601855	0.717996	0.826343	0.0559279	0.734426	0.775762	4.91238	5.29463	5.44497	5.31395	5.49636	5.38541	5.24497	5.07388
110564	0.407417	0.0142971	0.0380193	0.163656	0.21769	0.416911	0.644421	0.00172402	0.0337277	0.888181	0.000237572	0.00153694	4.34595	4.46318	4.70672	4.92496	5.40502	5.50716	5.30966	5.27598
110569	0.358953	0.186358	0.266587	-0.518488	0.147161	0.32529	-0.630626	0.0943679	0.262253	0.246815	0.328935	0.393798	2.03935	2.27664	2.40395	2.64247	2.34403	1.44176	2.3966	2.41091
110577	0.863432	0.00056724	0.0051823	0.149802	0.309312	0.512415	0.375104	0.0358002	0.148241	1.08873	0.000123721	0.00102693	3.77696	3.53363	4.55079	4.48415	4.9763	4.814	4.69182	4.79733
110582	0.122036	0.566775	0.645395	-0.648522	0.0491731	0.195123	-0.695739	0.042184	0.162895	0.0748185	0.710385	0.754172	2.9509	2.55904	2.95143	2.7961	1.98893	2.37021	2.86683	2.7947
110598	2.9662	0.00166249	0.00991667	0.272905	0.56058	0.732788	0.697551	0.189638	0.400764	3.39085	0.000641875	0.00291641	0.0954492	2.11158	3.96761	4.16109	4.59058	4.91802	4.64244	4.32237
110600	-4.63035	7.66874e-05	0.00184092	1.2245	0.0789131	0.239239	1.90841	0.0216099	0.113157	-3.94644	9.9783e-05	0.000901597	2.43681	2.76366	-2.51889	-1.51133	0.46956	-0.705079	-1.20165	-1.49598
110604	0.134893	0.477708	0.563932	0.163948	0.403327	0.602593	-0.184297	0.351539	0.543943	-0.213352	0.275607	0.338754	5.23031	5.22056	5.12737	5.59928	5.09794	5.25244	5.11022	4.91341
110609	-0.389218	0.17918	0.258952	0.470725	0.122422	0.291081	0.166257	0.549632	0.708697	-0.693686	0.0347729	0.0587888	6.87525	6.25948	6.46506	5.89976	6.34567	6.3471	5.82441	5.92669
110611	-0.545599	0.0682055	0.122732	0.396276	0.176075	0.36436	0.014746	0.956452	0.975578	-0.927129	0.00905474	0.0217722	7.29279	6.6008	6.53549	6.27396	6.44378	6.39295	5.90105	6.14271
110613	0.411228	0.162254	0.238917	0.176505	0.517623	0.700954	0.397533	0.175099	0.38233	0.632257	0.0480394	0.0772057	4.64117	4.97064	4.84452	5.60345	5.66596	5.56438	5.36144	5.51525
110615	1.65851	0.00889937	0.0268276	1.16084	0.0515051	0.199988	-0.0297831	0.950276	0.972103	0.467892	0.351227	0.414623	-3.20223	-3.41824	-1.78192	-1.51133	-1.85237	-1.51243	-3.37158	-2.30334
110623	0.321232	0.200631	0.282772	0.519018	0.108241	0.270173	-0.00607309	0.982856	0.990741	-0.203859	0.408919	0.472565	2.79401	2.73962	2.79097	3.42413	2.90252	3.25575	2.42284	2.70789
110624	0.520438	0.00656931	0.0213655	0.411855	0.0317298	0.153722	-0.135024	0.392048	0.582295	-0.0264413	0.847613	0.874124	3.77314	3.93403	4.2493	4.51104	4.25616	4.22228	3.82318	3.83109
110625	-0.639404	0.0248349	0.0571595	-0.793804	0.0197861	0.117555	-0.920058	0.011105	0.0806806	-0.765658	0.0110713	0.0255357	5.43137	5.45028	5.12256	4.45676	3.94637	3.81848	4.59132	4.76006
110626	-0.0764538	0.696402	0.759665	0.163764	0.47462	0.665382	-0.126715	0.57945	0.730345	-0.366933	0.0935831	0.135247	4.41615	3.99624	4.24045	4.00594	3.94637	4.05742	3.73171	3.94933
110630	0.55021	0.253756	0.341007	1.10687	0.051692	0.200179	0.738993	0.157705	0.358614	0.182329	0.691638	0.738077	-4.30177	-4.74017	-4.10385	-3.83326	-3.43733	-3.02701	-4.37158	-4.30334
110632	-0.242942	0.255521	0.342492	-0.235865	0.325036	0.529353	-0.11977	0.620101	0.758353	-0.126847	0.513569	0.574235	4.30424	3.95158	4.05097	3.69812	3.92899	3.60651	4.04205	3.95876
110650	1.30023	0.000121427	0.00225568	0.499896	0.0157811	0.104147	0.396776	0.0386434	0.155093	1.19711	0.000194332	0.00134749	4.17426	4.51132	5.64602	5.64045	6.16444	5.91593	5.58116	5.49918
110657	1.28444	0.000952653	0.00707711	-0.0116561	0.959007	0.976364	0.558286	0.0419831	0.162329	1.85438	0.00012301	0.00102388	3.82935	4.19794	5.03826	5.56548	5.8177	5.89483	5.99146	5.74515
110658	-1.35774	0.0225953	0.0532999	0.827003	0.166357	0.351439	0.595116	0.310115	0.504829	-1.58963	0.0102606	0.0240092	4.23101	3.60191	3.24488	1.78145	3.19203	3.11692	2.16758	2.49108
110661	-0.627038	0.0205244	0.0494906	-0.0438618	0.847942	0.924633	-0.582701	0.0362195	0.149378	-1.16588	0.00112827	0.00440531	5.99458	5.79365	5.52368	5.00279	4.6971	4.67244	4.57971	4.87906
110664	-0.758621	0.00335356	0.0157343	-0.0245297	0.894241	0.950968	-0.152604	0.420011	0.608257	-0.886695	0.00154157	0.00553058	7.42348	7.318	6.84816	6.37985	6.53565	6.3839	6.40238	6.56626
110666	3.37578	0.000424306	0.0043547	1.47897	0.0115647	0.0882348	1.47955	0.0128084	0.0858883	3.37636	0.000384103	0.00206982	-5.78719	-5.74017	-2.51889	-2.2483	-1.1154	-0.705079	-2.78662	-1.98141
110668	-0.720756	0.103017	0.169437	0.0502857	0.901831	0.954701	0.345241	0.435774	0.621656	-0.4258	0.269868	0.332762	5.06845	4.39554	4.48487	3.47962	4.46655	4.24912	4.1082	4.50724
110670	-0.631698	0.00465593	0.0180235	-0.35944	0.067723	0.232943	-0.0108301	0.950628	0.972213	-0.283089	0.087488	0.128004	8.32516	8.37869	7.94566	7.48811	7.72632	7.69214	7.99829	8.14039
110671	-0.948739	0.000986054	0.00718865	-0.175893	0.451492	0.646785	-1.36573	0.000535024	0.0208015	-2.13858	1.56527e-05	0.000378308	5.51487	5.74516	4.75102	4.60553	3.55135	3.08748	3.37661	3.60955
110675	-0.420055	0.494523	0.579314	1.66128	0.0826544	0.239239	-0.879228	0.263743	0.482973	-2.96056	0.00464838	0.0128255	-1.26363	-1.49224	-2.51889	-1.0259	-3.43733	-1.92747	-4.37158	-4.30334
110682	0.602367	0.0361275	0.0757054	0.53738	0.056772	0.210931	0.315155	0.220687	0.439459	0.380142	0.139206	0.189007	4.71166	4.03297	5.00206	4.94482	5.21013	5.36715	4.82071	4.68251
110684	1.10114	0.0109127	0.0310868	-1.07666	0.00800548	0.072609	0.476403	0.197862	0.411157	2.65421	3.51672e-05	0.000524313	1.15532	1.35787	2.46601	2.23283	2.39556	3.25575	3.77308	4.04981
110690	0.342523	0.0479423	0.0937175	-0.950725	0.000661691	0.0223106	-0.411341	0.0352849	0.147255	0.881908	0.000579111	0.00271923	4.40879	4.73049	4.93232	4.89125	4.46354	4.53741	5.51868	5.38492
110692	0.179092	0.116436	0.185655	-0.0896116	0.443299	0.64003	-0.0363925	0.757096	0.851313	0.232311	0.0481584	0.0772512	8.26809	8.3399	8.38667	8.58679	8.42337	8.46925	8.49847	8.57446
110697	0.0999972	0.580547	0.658126	-0.237536	0.308917	0.512034	-0.373293	0.137358	0.331123	-0.0357599	0.83625	0.864647	3.28158	3.07041	3.36376	3.17797	2.71242	3.08748	3.25047	3.02758
110698	0.407571	0.626219	0.697928	2.02607	0.044639	0.18525	1.63149	0.0880402	0.250979	0.0129898	0.987489	0.98981	-2.97984	-4.1552	-2.51889	-3.83326	-1.1154	-1.92747	-4.37158	-2.71837
110702	0.298227	0.182967	0.262866	0.44182	0.0644161	0.225475	0.556928	0.0303613	0.135463	0.413334	0.0786749	0.117192	4.99826	4.57498	4.93781	5.2382	5.47855	5.80272	5.16564	5.23388
110703	-0.135454	0.365365	0.455456	-1.00765	0.000488507	0.0192959	-0.144897	0.398958	0.588984	0.727303	0.00116922	0.00454142	4.19437	4.45828	4.15825	4.22744	3.98052	4.10962	5.11827	4.98899
110704	1.1915	0.00904678	0.0270836	-1.67444	0.00120526	0.0291728	0.947989	0.0247815	0.121276	3.81394	1.02828e-05	0.000332687	2.51201	3.13942	3.7227	4.34167	4.75743	5.16352	6.80771	6.46733
110706	0.361354	0.561395	0.640797	0.245062	0.749146	0.866519	-1.10283	0.164083	0.367309	-0.98654	0.166855	0.221065	-2.46527	-3.00464	-1.68701	-3.10208	-3.43733	-3.51243	-3.14507	-4.30334
110712	0.0244907	0.917652	0.938087	0.837925	0.0207624	0.120904	0.408932	0.179084	0.387798	-0.404502	0.127508	0.175622	1.16397	0.958053	0.989542	1.19619	1.515	1.47671	0.871023	0.437592
110719	0.0291558	0.908704	0.931388	-1.34283	0.00147185	0.0318717	0.418836	0.183028	0.392777	1.79082	0.000111646	0.000965658	3.39023	3.54292	3.11532	3.9243	3.9114	3.91718	5.34781	5.16631
110720	1.7941	0.00521456	0.0180235	0.862575	0.0889441	0.239239	0.494694	0.289907	0.482973	1.42622	0.0148992	0.0294382	-5.78719	-5.74017	-4.10385	-3.83326	-3.43733	-3.51243	-4.37158	-4.30334
110723	-0.408595	0.0711521	0.1267	-0.118537	0.61685	0.775513	-0.301021	0.234653	0.457426	-0.591078	0.017459	0.0333799	4.09239	4.39554	3.68405	4.00594	3.69195	3.38238	3.54131	3.76813
110734	1.29981	0.00157536	0.00957405	-0.0831565	0.758798	0.87095	0.00666349	0.981054	0.989677	1.38963	0.000851434	0.00359742	2.13762	2.55904	3.396	3.92829	3.48153	3.81848	3.8133	3.65667
110735	0.951899	0.0776905	0.135751	-0.049908	0.915167	0.959979	0.447266	0.353408	0.545772	1.44907	0.0181815	0.034485	4.67939	5.83774	5.70028	6.71267	6.62741	6.68846	6.78007	6.63551
110739	-0.0217817	0.869474	0.900168	0.213403	0.199614	0.394993	0.117026	0.471697	0.647743	-0.118159	0.370225	0.434044	3.2762	3.29601	3.22707	3.30629	3.33085	3.43008	3.07963	3.25891
110741	1.00584	0.160867	0.237314	0.862575	0.235555	0.432751	0.494694	0.477962	0.651028	0.637955	0.35106	0.414468	-5.78719	-4.1552	-4.10385	-3.83326	-3.43733	-3.51243	-4.37158	-4.30334
110745	-0.180203	0.321915	0.412316	0.224794	0.246065	0.444937	-0.0641005	0.728117	0.83357	-0.469097	0.0296551	0.0516643	5.25925	4.94546	5.09337	4.74039	4.79629	4.91802	4.65356	4.61254
110756	-0.167707	0.380882	0.471451	0.370832	0.118933	0.286206	0.225463	0.322026	0.516141	-0.313075	0.117796	0.164263	3.72653	3.45705	3.45839	3.38591	3.55135	3.74495	3.45497	3.09754
110767	1.02158	0.00938697	0.0277815	-0.244877	0.407014	0.60643	0.356861	0.281278	0.482973	1.62332	0.000507213	0.0024873	0.479593	0.798994	1.45074	1.89466	1.98893	2.04215	2.03781	2.49108
110770	-0.742767	0.0468967	0.0921566	-0.0581572	0.855345	0.928748	0.0764635	0.814001	0.88796	-0.608146	0.0828675	0.122399	5.89712	5.45151	5.33702	4.50213	5.05852	4.95924	4.91151	5.22219
110773	2.14136	0.00490802	0.0180235	-0.175836	0.679803	0.820438	0.836283	0.119621	0.303153	3.15348	0.000368717	0.00201974	0.278895	1.67769	2.66433	3.61795	3.87555	4.01895	4.17145	4.07604
110783	0.0644912	0.920552	0.9403	-2.32757	0.0158213	0.104183	-0.955242	0.272978	0.482973	1.43682	0.0281207	0.0494328	-0.657911	0.563616	0.144078	-0.132819	-1.85237	-0.0530023	1.51106	1.25125
110788	2.19065	0.0534193	0.101758	-1.8786	0.0808406	0.239239	-0.702351	0.494216	0.663625	3.36689	0.00702521	0.0177881	-4.20223	-3.41824	-2.51889	-0.663334	-1.1154	-3.51243	-0.67114	-0.215872
110793	0.697958	0.00579018	0.0194827	-1.0321	0.000993464	0.0272762	-0.583162	0.0150693	0.0930621	1.14689	0.000466859	0.00234925	4.94667	4.96633	5.44112	5.86891	5.20291	4.94289	6.12328	6.08361
110801	1.38514	0.0100153	0.0291224	0.872952	0.0393077	0.170796	1.23796	0.0141823	0.0902824	1.75014	0.00220971	0.00723795	-0.577741	-0.0677398	0.850347	1.29602	1.98893	2.59609	1.18301	1.67394
110808	-1.94375	0.000956668	0.00709241	-0.373635	0.390926	0.592142	-0.428325	0.33831	0.531674	-1.99844	0.000701864	0.00311661	10.4069	9.75366	8.51431	7.74133	7.73759	7.68417	8.14338	8.0245
110811	2.78536	0.00124047	0.00823945	-0.292036	0.497747	0.684775	0.332332	0.483531	0.654134	3.40972	0.000272816	0.00167077	-1.39488	0.190572	2.08598	2.27527	2.29059	2.71638	2.97715	2.61553
110814	3.37578	0.000119036	0.00224943	0.862575	0.0905038	0.241667	-1.08699	0.0331586	0.14247	1.42622	0.0152927	0.0300269	-5.78719	-5.74017	-2.51889	-2.2483	-3.43733	-3.51243	-4.37158	-4.30334
110815	-0.388759	0.107715	0.175282	-0.953024	0.0108192	0.084959	-0.554829	0.0941068	0.261649	0.00943623	0.960725	0.969579	3.05516	3.16973	2.76652	2.67454	2.17738	2.15999	2.84759	3.40402
110816	-1.89966	0.000320206	0.00372877	-0.314672	0.494485	0.681662	-1.70466	0.00522391	0.0557217	-3.28965	3.33672e-05	0.000513898	5.53867	5.28843	3.77267	3.22202	1.77212	1.84512	1.69451	2.56703
110817	-0.684255	0.00852952	0.0259517	-0.0915703	0.671981	0.814981	0.0607031	0.788019	0.87131	-0.531982	0.0186273	0.0351793	3.95932	4.32996	3.41185	3.51547	3.43303	3.60651	3.69988	3.52321
110818	1.76721	0.0378286	0.0783077	-1.08757	0.20928	0.407499	-1.67794	0.0701463	0.220159	1.17684	0.133212	0.182175	-2.97984	-4.1552	-2.51889	-1.0259	-3.43733	-3.51243	-2.78662	-1.98141
110819	-0.505841	0.295861	0.385094	0.544369	0.253943	0.45321	1.58099	0.0170368	0.099244	0.530784	0.212323	0.271453	-0.232605	0.190572	-0.40341	-0.663334	0.650132	1.44176	0.913823	0.0889822
110825	-0.60062	0.0891837	0.151638	0.130356	0.69089	0.82721	0.204663	0.550151	0.709136	-0.526313	0.113785	0.159518	5.07777	4.69967	4.72587	3.80337	4.61252	4.37631	4.40123	4.32237
110827	0.25794	0.582858	0.660056	-0.734757	0.145938	0.324025	1.27636	0.0270032	0.126894	2.26905	0.00206207	0.00687534	4.5426	6.0416	5.39799	5.70396	6.76357	6.88951	7.48212	7.64101
110829	-0.546561	0.0186782	0.0461293	-0.0528138	0.800421	0.894217	0.00939713	0.965064	0.980325	-0.48435	0.0255066	0.0455485	9.55416	9.25609	9.06216	8.63994	8.85872	8.87919	8.81593	9.02996
110830	1.7941	0.00521456	0.0180235	0.862575	0.0889441	0.239239	0.494694	0.289907	0.482973	1.42622	0.0148992	0.0294382	-5.78719	-5.74017	-4.10385	-3.83326	-3.43733	-3.51243	-4.37158	-4.30334
110833	0.355236	0.284011	0.372563	0.765396	0.0973496	0.253459	-0.14567	0.708281	0.819612	-0.55583	0.138946	0.188718	0.321331	0.735568	0.754132	1.02472	1.08623	0.394457	0.151982	-0.215872
110837	-0.457149	0.0169023	0.0428518	0.631506	0.0039396	0.050488	0.247426	0.128514	0.316996	-0.841228	0.000897712	0.00372671	6.22298	5.98988	5.67915	5.62001	5.80822	5.98542	5.15002	5.38141
110838	-1.2351	5.71649e-05	0.00162997	0.0986367	0.585861	0.752168	-0.961191	0.000917311	0.0258298	-2.29493	2.35836e-06	0.000242508	5.47431	5.48685	4.16761	4.33165	3.45749	3.11692	3.19066	3.18048
110839	-1.12695	0.000831938	0.00644388	-0.380646	0.247065	0.446127	-1.52961	0.00148223	0.0317629	-2.27592	3.08588e-05	0.000499874	4.42348	4.62943	3.41185	3.38591	1.69195	2.04215	1.96827	2.54215
110847	0.234572	0.187015	0.267327	0.633385	0.0144832	0.0994657	0.221518	0.280433	0.482973	-0.177295	0.307033	0.371678	2.82014	2.65644	2.97297	2.9741	3.07837	3.30775	2.69451	2.42459
110851	-0.195126	0.285203	0.37388	0.800562	0.00660069	0.0656548	-0.107297	0.590506	0.737731	-1.10298	0.000740009	0.00324614	4.63382	4.32996	4.39998	4.16109	4.29738	4.06499	3.48017	3.27409
110852	0.532646	0.0284508	0.0630152	0.617498	0.0198039	0.117596	0.631271	0.0215654	0.113145	0.546419	0.0209294	0.0387296	2.8458	2.56817	3.44305	3.01223	3.82006	3.92219	3.22088	3.28912
110857	-1.00997	0.177703	0.257192	0.868868	0.258465	0.459084	1.25761	0.135619	0.328547	-0.621231	0.357889	0.421362	-1.69973	-1.83327	-1.78192	-3.83326	-1.85237	-1.19051	-2.78662	-1.98141
110863	-0.213428	0.338993	0.42858	0.371355	0.21982	0.41907	-0.668834	0.0391019	0.156355	-1.25362	0.00131629	0.00494686	4.57585	4.11937	4.03058	4.24889	3.68161	3.25575	3.17531	3.00955
110868	-1.64836	0.00757971	0.0238055	-0.556675	0.352317	0.556104	-1.82656	0.0148858	0.0924013	-2.91825	0.000465591	0.00234584	7.52186	7.43897	6.42656	5.24088	4.10956	3.90542	4.03356	5.09968
110873	1.27798	0.0172576	0.0435122	0.70229	0.124395	0.293492	-1.24111	0.0200109	0.108865	-0.66542	0.139333	0.189137	5.91455	6.68689	8.09429	7.05015	6.21551	6.45623	5.7845	5.48293
110874	0.224314	0.224682	0.310274	-0.0274557	0.879682	0.942539	0.0313389	0.86581	0.921554	0.283108	0.130028	0.178536	4.63277	4.34331	4.88199	4.52868	4.79629	4.69214	4.83054	4.71069
110881	1.41074	0.00039524	0.00415993	-0.600257	0.0351454	0.161344	-0.335782	0.201612	0.415536	1.67522	0.000100417	0.000905267	1.167	1.44966	2.52551	2.93493	2.34403	2.4183	3.04627	2.91583
110882	0.19903	0.297038	0.386298	0.0390836	0.840891	0.919971	0.134506	0.510969	0.677016	0.294453	0.128712	0.177035	4.15092	4.09114	4.20449	4.44751	4.19929	4.70189	4.46447	4.36555
110885	-0.80882	0.0373365	0.0776256	-0.0147339	0.962861	0.978186	0.730846	0.0525079	0.185095	-0.0632393	0.84223	0.869625	5.6635	6.34564	4.84159	5.5612	5.87328	5.97741	5.82687	6.05312
110892	2.98763	0.00631968	0.0207855	0.862575	0.309063	0.512074	-0.698829	0.378113	0.568766	1.42622	0.115309	0.161352	-5.78719	-5.74017	-1.78192	-3.83326	-3.43733	-3.51243	-4.37158	-4.30334
110896	0.396964	0.342718	0.432418	-0.87347	0.0559869	0.209158	0.567239	0.240412	0.463955	1.83767	0.000954696	0.00389448	-0.429642	0.325924	0.144078	0.559058	1.08623	0.735494	1.6057	1.96345
110900	0.373398	0.0471859	0.0925567	-0.663458	0.0215968	0.122986	-1.36445	0.000602888	0.0217234	-0.327594	0.0820842	0.121377	3.59435	3.57951	3.98891	3.92829	2.82946	2.37021	3.41632	3.09754
110907	1.48033	0.000395212	0.00415993	0.0214826	0.920087	0.960735	0.525522	0.0516936	0.183444	1.98437	5.1999e-05	0.000641178	2.43681	3.00467	4.06106	4.35162	4.74754	4.70189	4.73433	4.67108
110910	-1.55084	8.54323e-05	0.00194119	-0.652986	0.0123642	0.0916638	-0.228224	0.26363	0.482973	-1.12607	0.000541275	0.00259882	7.27805	7.04978	5.8547	5.37131	5.38285	5.38843	6.01751	6.0597
110912	1.06304	0.0627403	0.115376	0.499822	0.336452	0.540126	0.494694	0.347103	0.539616	1.05791	0.0608486	0.0945935	-5.05601	-5.00898	-4.10385	-3.83326	-3.43733	-3.51243	-4.37158	-3.57215
110916	0.704397	0.0033897	0.0158478	-0.34448	0.0671984	0.231815	0.327019	0.0912049	0.256145	1.3759	6.36332e-05	0.000718447	3.61582	3.76961	4.30129	4.50213	4.70733	4.74023	5.22275	4.91341
110917	-0.386861	0.0812846	0.140851	-0.280749	0.246848	0.445948	-0.197987	0.417186	0.605665	-0.304099	0.132621	0.181489	4.09086	3.94107	3.36376	3.92829	3.48153	3.38238	3.72118	3.70229
110918	-0.333701	0.159501	0.236497	0.736843	0.0547074	0.206659	-0.520332	0.116484	0.297848	-1.59088	0.000552416	0.00263618	2.35746	2.21984	1.96224	1.9481	1.08623	1.77297	0.837874	0.554646
110921	0.387424	0.10851	0.176262	-0.324838	0.139724	0.314334	0.900691	0.00688235	0.0636311	1.61295	6.24235e-05	0.000711104	1.49821	1.58176	2.00468	1.83917	2.79149	2.86261	2.97715	3.33329
110924	1.7941	0.00952444	0.0280493	0.491017	0.268104	0.469221	2.07933	0.00326787	0.0445645	3.38241	0.000216323	0.00145094	-5.78719	-5.74017	-4.10385	-3.83326	-1.85237	-1.92747	-2.04965	-2.71837
110931	0.499662	0.40738	0.497034	0.227285	0.679008	0.819884	1.1431	0.102677	0.276211	1.41548	0.0256716	0.0457643	-0.577741	0.0411946	-0.40341	0.921628	0.810597	1.91383	1.30085	0.982067
110933	0.99765	0.151844	0.227204	0.862575	0.221578	0.41907	0.494694	0.46355	0.640386	0.629769	0.341647	0.405721	-4.20223	-5.74017	-4.10385	-3.83326	-3.43733	-3.51243	-4.37158	-4.30334
110934	-0.24451	0.0996975	0.165414	-0.522504	0.0059866	0.0621739	0.121056	0.37696	0.56761	0.399049	0.0189474	0.0356994	5.51487	5.61353	5.19307	5.44983	5.46051	5.42126	6.02181	5.9049
110939	4.33396	1.58926e-05	0.000992446	1.86113	0.00104319	0.0276701	0.538204	0.124752	0.311183	3.01103	0.00017902	0.00129467	-4.20223	-4.1552	0.419713	-0.132819	0.650132	0.735494	-1.20165	-1.13341
110942	2.60709	0.00322517	0.0153798	0.862575	0.186076	0.377203	-0.318293	0.588907	0.736736	1.42622	0.0481048	0.0772057	-5.78719	-5.74017	-2.51889	-3.83326	-3.43733	-3.51243	-4.37158	-4.30334
110945	0.281628	0.44978	0.537233	0.394992	0.408335	0.607945	-0.198083	0.665213	0.791308	-0.311447	0.419959	0.483239	2.88876	2.11158	3.09582	2.43353	2.49341	2.67739	2.34267	2.03651
110951	0.83667	0.3194	0.409535	-1.77097	0.129866	0.301689	-2.5359	0.0429972	0.164281	0.0717427	0.930774	0.944865	-2.32776	-1.2166	-0.40341	-1.51133	-3.43733	-3.51243	-2.78662	-0.602895
110953	0.396068	0.0612615	0.113104	0.0269326	0.891815	0.949403	0.145401	0.490377	0.660401	0.514537	0.01937	0.0363294	3.3498	3.57951	3.92406	3.78879	3.92899	4.08002	4.1637	3.78942
110954	1.84383	2.74276e-05	0.00117761	0.231528	0.193549	0.387242	0.486034	0.0255756	0.123541	2.09834	9.7852e-06	0.000331551	2.49358	2.40449	4.23154	4.3615	4.8891	4.67244	4.71323	4.37966
110961	-0.141992	0.471986	0.558257	0.0989931	0.6345	0.788402	0.320449	0.156181	0.356099	0.0794636	0.682083	0.72925	7.22568	6.94918	7.20278	6.69128	7.21103	7.32283	7.14579	7.19002
110962	0.172529	0.180031	0.259828	0.313675	0.0318906	0.154033	0.194176	0.138797	0.332784	0.0530299	0.657097	0.706587	5.28829	5.07762	5.33286	5.37863	5.54281	5.55634	5.28127	5.19052
110964	1.02226	0.184441	0.264506	0.0762886	0.921513	0.960885	-0.318293	0.683028	0.803807	0.627676	0.39339	0.457424	-4.20223	-4.1552	-2.51889	-3.83326	-3.43733	-3.51243	-4.37158	-2.71837
110969	0.742138	0.028389	0.0629134	0.701206	0.0325296	0.155329	0.971208	0.0118311	0.0832312	1.01214	0.00521989	0.0140579	0.321331	0.783397	1.28847	1.29602	2.37002	2.15999	1.40978	1.71903
110970	0.455563	0.0502017	0.0969279	1.25501	0.0026352	0.0424764	-0.241623	0.329592	0.52377	-1.04107	0.00322102	0.00971597	2.93048	3.34995	3.60351	3.58459	3.24917	3.45335	2.22833	1.96345
110973	-0.813445	0.00634999	0.0208396	0.0377082	0.873632	0.939007	0.286126	0.280272	0.482973	-0.565028	0.0208315	0.0385735	3.66195	4.07522	3.11532	2.98692	3.24917	3.43008	3.37661	3.22805
110974	0.605865	0.105119	0.172122	0.27893	0.44949	0.644923	0.379167	0.335859	0.529215	0.706102	0.0548989	0.086619	1.66402	2.25419	2.81501	2.27527	2.67119	3.20181	2.82809	2.49108
110976	-1.69263	0.260088	0.347211	2.20609	0.194043	0.387955	1.88579	0.258057	0.482973	-2.01293	0.189564	0.246932	-2.32776	0.0411946	-4.10385	-1.51133	0.0221008	-1.92747	-2.04965	-4.30334
110978	-0.0176635	0.91698	0.937881	0.295505	0.14446	0.321512	0.260837	0.200688	0.414749	-0.0523318	0.749617	0.789991	3.90803	4.16823	3.96761	4.07963	4.10956	4.44757	4.05887	3.91098
110983	0.757274	0.00714153	0.0227857	0.95011	0.00151349	0.0324328	1.53381	0.000178589	0.0128859	1.34098	0.000232338	0.00151435	3.4113	2.95297	3.86482	4.02534	5.39872	5.54869	4.46087	4.58845
110985	1.7941	0.00521456	0.0180235	0.862575	0.0889441	0.239239	0.494694	0.289907	0.482973	1.42622	0.0148992	0.0294382	-5.78719	-5.74017	-4.10385	-3.83326	-3.43733	-3.51243	-4.37158	-4.30334
110991	4.97778	5.00643e-07	0.000414725	0.842973	0.00405789	0.0511457	1.00581	0.00161963	0.0329334	5.14062	4.21618e-07	0.000164871	1.13167	1.67769	6.18732	6.56869	7.32837	7.44249	6.61923	6.46568
110997	0.949807	0.0651724	0.118646	0.492891	0.387945	0.589321	-0.260792	0.625896	0.762315	0.196125	0.677948	0.725544	1.31084	2.00803	2.00468	3.28568	2.34403	2.34555	1.85724	1.84641
110998	-0.0303215	0.909035	0.931512	-1.0272	0.0151658	0.101837	-0.529053	0.159594	0.361148	0.467825	0.0814284	0.120632	0.812719	0.844797	0.59659	1.02472	0.46956	0.0725286	1.12027	1.47802
111001	1.7941	0.00521456	0.0180235	0.862575	0.0889441	0.239239	0.494694	0.289907	0.482973	1.42622	0.0148992	0.0294382	-5.78719	-5.74017	-4.10385	-3.83326	-3.43733	-3.51243	-4.37158	-4.30334
111002	0.424523	0.695141	0.758844	-1.43104	0.186773	0.377919	0.692295	0.551951	0.710464	2.54786	0.0274318	0.0484071	-3.46527	-2.93281	-1.78192	-3.83326	-0.629976	-3.51243	-0.464689	-0.843904
111004	1.69104	0.00716173	0.02283	-0.116079	0.793505	0.891086	-0.160829	0.716978	0.825959	1.64629	0.00818025	0.0200904	4.29894	5.72897	6.5606	6.84886	6.56689	6.52237	6.73236	6.58921
111007	0.228821	0.0615434	0.113537	0.0809884	0.465386	0.657155	0.720562	0.000427086	0.0191914	0.868395	9.04912e-05	0.000852488	6.88722	6.95615	7.18905	7.11145	7.84518	7.89643	7.85031	7.72837
111008	-0.372282	0.294476	0.38376	0.145543	0.693414	0.828681	-0.355274	0.348612	0.541165	-0.873099	0.0361532	0.0606926	5.69006	5.01054	5.29916	4.63842	4.8891	4.36408	4.33232	4.62444
111010	2.57755	0.0415787	0.0843302	2.03313	0.117501	0.283945	-0.272827	0.794713	0.874987	0.271591	0.815861	0.847709	-5.78719	-3.41824	-2.51889	-1.51133	-3.43733	-1.19051	-4.37158	-4.30334
111012	1.19125	0.0258891	0.0591298	-0.542665	0.318038	0.522204	-1.49324	0.0210854	0.111806	0.240668	0.591004	0.647711	-1.14334	-2.03973	-0.644418	-0.132819	-1.85237	-1.92747	-1.20165	-1.49598
111024	0.0548598	0.967827	0.976086	0.850046	0.542219	0.718909	1.28033	0.384865	0.575505	0.485144	0.711579	0.755238	-2.32776	-5.74017	-4.10385	-3.83326	-1.85237	-3.51243	-2.78662	-4.30334
111025	-0.287859	0.0796399	0.138448	-0.0566959	0.699898	0.832784	0.357947	0.0410869	0.160266	0.126784	0.394922	0.458732	6.47871	6.2829	6.24598	5.94317	6.48302	6.41978	6.51792	6.49837
111026	0.162498	0.315489	0.405391	0.0747836	0.707028	0.837792	-0.286499	0.180229	0.389289	-0.198784	0.228785	0.289308	2.5571	2.64785	2.63762	2.90821	2.53995	2.4183	2.42284	2.38317
111037	0.919374	0.0177086	0.044312	0.257874	0.42827	0.625434	0.267434	0.428432	0.615611	0.928934	0.0140469	0.0294382	3.03617	2.90729	4.25809	3.47962	4.25616	4.06499	4.17145	3.62385
111038	0.0783827	0.689179	0.753741	-0.0922833	0.640786	0.792829	0.243151	0.25128	0.477106	0.413817	0.0632672	0.097616	5.08086	4.6008	5.01768	4.8142	5.24215	5.08376	5.18109	5.32784
111039	0.380745	0.0275208	0.0617111	0.121434	0.413697	0.612549	0.0997234	0.505888	0.673004	0.359034	0.0316473	0.054461	4.42104	4.23855	4.76959	4.64652	4.82476	4.79591	4.80584	4.57011
111043	-0.765705	0.126084	0.197447	0.0898514	0.849333	0.925136	0.0176183	0.970113	0.982968	-0.837938	0.101105	0.144473	7.25498	6.45674	6.73141	5.46366	6.17922	6.04215	5.9447	6.09648
111044	-0.629149	0.00637952	0.0208905	-0.0634379	0.741159	0.862268	0.0778014	0.700065	0.814899	-0.48791	0.0141091	0.0294382	3.56816	3.6671	3.0357	2.93493	3.27691	2.86261	3.09603	3.16427
111049	2.60709	0.00528283	0.0181613	1.36626	0.0712456	0.238613	0.185387	0.768864	0.858963	1.42622	0.0668523	0.102144	-5.78719	-5.74017	-2.51889	-3.83326	-3.43733	-2.51243	-4.37158	-4.30334
111062	2.081	0.0499872	0.0966857	2.87033	0.0105833	0.0839908	2.07334	0.0345142	0.14593	1.28401	0.192857	0.250265	-2.61727	-4.1552	-1.10385	-1.51133	0.810597	0.735494	-0.912148	-3.30334
111067	-0.197307	0.364273	0.454475	0.27739	0.221007	0.41907	0.365183	0.129726	0.318911	-0.109514	0.596233	0.652364	5.12495	4.61188	4.62066	4.72516	4.89806	5.17056	4.84517	4.67108
111084	-0.240359	0.609813	0.683513	0.316113	0.517643	0.700954	0.510679	0.328374	0.522966	-0.0457938	0.917657	0.93441	3.93561	4.80962	3.53278	4.79974	4.53421	4.74966	4.28306	4.37262
111089	0.00708491	0.950368	0.963281	0.0900696	0.437566	0.634835	0.301911	0.0303138	0.135414	0.218927	0.0909172	0.132034	5.63435	5.55101	5.52368	5.67652	5.89582	5.90753	5.86204	5.76141
111092	1.7941	0.00521456	0.0180235	0.862575	0.0889441	0.239239	0.494694	0.289907	0.482973	1.42622	0.0148992	0.0294382	-5.78719	-5.74017	-4.10385	-3.83326	-3.43733	-3.51243	-4.37158	-4.30334
111093	1.39914	0.0672363	0.121412	-0.522946	0.425734	0.623122	0.261465	0.700845	0.815568	2.18355	0.00988379	0.0233391	-5.78719	-4.47713	-4.10385	-3.34783	-3.43733	-3.51243	-2.60604	-3.30334
111099	-0.505273	0.0436381	0.0872615	0.349657	0.195636	0.390096	0.240572	0.367798	0.559026	-0.614357	0.0176898	0.0337321	2.74028	3.0575	2.49606	2.27527	2.62876	2.63731	2.42284	2.13961
111103	0.757575	0.175545	0.254686	-0.0671935	0.901009	0.954336	0.325316	0.57933	0.730345	1.15008	0.0429772	0.0702899	-0.657911	0.0411946	0.0660756	0.867181	1.37002	0.188006	0.62842	1.05422
111108	-0.334212	0.343601	0.433235	-0.993983	0.0505631	0.197941	-0.482761	0.313486	0.508185	0.17701	0.555743	0.614028	2.38773	3.0832	2.66433	2.09748	1.98893	1.84512	2.86683	2.95405
111110	1.7941	0.0673291	0.121479	0.850046	0.299553	0.503374	1.28033	0.150371	0.348499	2.22439	0.0284832	0.0499303	-5.78719	-5.74017	-4.10385	-3.83326	-1.85237	-3.51243	-2.78662	-4.30334
111112	2.31846	0.0050031	0.0180235	-0.844109	0.10072	0.258814	0.547968	0.320481	0.514979	3.71053	0.000216042	0.00145094	-0.114769	1.20235	2.27119	3.51547	3.30414	3.49879	4.22461	4.27031
111120	0.244994	0.123883	0.194946	-0.0739752	0.652063	0.801794	0.0935036	0.589271	0.736882	0.412473	0.0171287	0.0328592	3.11065	2.96374	3.27985	3.28568	3.24917	3.49879	3.42932	3.47145
111122	-0.204964	0.117245	0.186617	0.191211	0.140264	0.314994	-0.0970976	0.422958	0.61119	-0.493272	0.00427822	0.0120379	5.94794	5.92117	5.79853	5.6606	5.60979	5.65498	5.35464	5.52797
111126	6.52028	8.71342e-05	0.00194708	0.255622	0.587399	0.753433	-1.00549	0.0520709	0.184375	5.25916	0.000336679	0.00190096	-2.97984	-0.610882	4.33494	5.12964	3.63948	3.78219	3.46762	3.44486
111128	1.31165	0.000217148	0.00303144	0.326022	0.103912	0.263443	-0.205451	0.273601	0.482973	0.78018	0.00346024	0.0102383	4.34852	4.58739	5.99023	5.56975	5.63681	5.51271	5.27047	5.2261
111131	-0.281049	0.339659	0.429239	-0.946518	0.052195	0.201162	-1.18503	0.0239609	0.119143	-0.519562	0.0975794	0.140073	1.7597	2.08638	1.56858	1.72133	0.0221008	0.879883	1.18301	1.6274
111132	-0.526494	0.00425167	0.0180235	-0.506578	0.00791656	0.072195	-0.115021	0.421462	0.609545	-0.134937	0.289598	0.353982	7.93615	7.7867	7.37138	7.29924	7.34649	7.09397	7.68607	7.76846
111137	0.626573	0.0251385	0.0577137	-0.199927	0.387106	0.588382	0.0405591	0.856708	0.916115	0.867059	0.00615396	0.0160449	4.51174	4.99913	5.16177	5.60807	5.40985	5.43564	5.68812	5.55763
111138	-1.01632	0.251212	0.338696	0.0873468	0.926544	0.963143	0.32859	0.738667	0.84102	-0.775075	0.349156	0.413609	-1.39488	-1.34785	-2.51889	-2.2483	-3.43733	-0.705079	-2.78662	-1.49598
111143	-1.19783	0.00505971	0.0180235	-0.263831	0.528601	0.709273	-0.594446	0.184185	0.394496	-1.52844	0.00140772	0.00518279	3.49358	3.37358	2.69057	1.72133	1.84807	1.44176	1.77817	2.03651
111145	1.37617	0.00231694	0.0125023	0.615577	0.0688549	0.235052	0.515477	0.122563	0.307721	1.27607	0.00287482	0.00891176	0.954273	0.599685	2.12497	2.18911	2.79149	2.55366	1.73694	2.38317
111148	-0.280843	0.0914353	0.154542	-0.0395079	0.822766	0.909392	-0.111533	0.543728	0.704968	-0.352867	0.0387254	0.0642875	3.64535	3.7007	3.33078	3.46136	3.10183	3.45335	3.27947	3.362
111155	-0.21909	0.305192	0.394924	-0.170018	0.448209	0.644064	0.475154	0.0860343	0.247507	0.426083	0.0436293	0.0711906	2.69259	2.76366	2.79097	2.18911	2.97206	2.99536	3.1598	3.14788
111157	0.58872	0.39501	0.485166	-0.39696	0.562911	0.734869	0.434978	0.563207	0.719131	1.42066	0.0471068	0.0759717	-0.929213	-0.695771	-1.29649	0.921628	0.0221008	0.394457	0.757703	0.451552
111158	1.6061	0.190127	0.270515	0.0644103	0.957923	0.976244	-0.471934	0.697874	0.814016	1.06976	0.369051	0.43288	-5.78719	-3.41824	-4.10385	-1.83326	-3.43733	-3.51243	-2.78662	-4.30334
111161	2.64259	0.00835312	0.0254944	-0.529189	0.499966	0.686988	-1.13863	0.168398	0.373398	2.03315	0.0265874	0.0471541	-3.46527	-4.1552	-1.29649	-1.0259	-3.43733	-1.19051	-2.04965	-1.49598
111174	-1.02523	0.00691511	0.0222297	-0.0104249	0.974019	0.984577	-0.560672	0.113131	0.292596	-1.57547	0.00086989	0.00365591	5.75342	5.11392	4.59312	4.20566	4.01388	3.68724	3.74216	3.97744
111179	-0.402244	0.119545	0.189468	0.124146	0.624868	0.782051	0.417349	0.155292	0.355043	-0.10904	0.610612	0.664867	3.78456	3.7775	3.44305	3.30629	4.01388	3.5856	3.94583	3.39015
111181	-0.770268	0.00836348	0.025518	-0.298477	0.285812	0.489378	-0.787263	0.0202387	0.109516	-1.25905	0.000763226	0.00331992	4.9089	4.8828	4.3266	3.90145	3.6607	3.02672	3.71057	3.56085
111183	-1.34685	0.000565341	0.0051823	-2.07234	0.000641247	0.0220837	-1.7351	0.00201329	0.0358666	-1.00961	0.00145186	0.00530502	3.97269	4.13789	2.95143	2.43353	0.810597	1.13142	3.19066	2.89634
111184	0.704582	0.000746183	0.00602533	0.353384	0.0232651	0.127426	0.417165	0.0132218	0.087384	0.768364	0.000383826	0.00206926	3.79965	3.74566	4.45457	4.50213	4.78667	4.99932	4.568	4.51365
111185	0.310316	0.082221	0.142045	-0.0567579	0.751711	0.867219	0.0766136	0.68467	0.804358	0.443687	0.018259	0.0346156	2.72456	2.61298	2.97297	2.98692	3.22088	2.89696	3.06305	3.16427
111187	0.585005	0.1738	0.252707	-0.908516	0.131187	0.303761	-1.2672	0.0505348	0.181191	0.22632	0.572222	0.629613	2.93048	3.88919	4.22258	3.7366	2.58504	2.86261	3.92763	3.33329
111189	-0.0135304	0.959217	0.969787	0.0619203	0.849274	0.925136	-0.173332	0.60342	0.747062	-0.248783	0.354924	0.418283	3.52796	2.97064	3.45839	2.98692	3.10183	3.02672	2.95934	3.04539
111191	5.15803	2.30136e-06	0.000508685	0.520121	0.166823	0.351929	-2.04205	0.000295942	0.0156549	2.59586	0.000304882	0.00178736	-1.69973	-2.57024	2.95143	3.10926	0.954987	1.01113	0.582617	0.340521
111194	4.23725	0.00413354	0.0180235	0.861924	0.473669	0.664244	-2.32986	0.0540994	0.188568	1.04546	0.380577	0.444478	-3.46527	-5.74017	-0.933924	0.254204	-1.85237	-3.51243	-4.37158	-2.71837
111195	-0.674268	0.265372	0.353001	0.27764	0.717137	0.844161	-0.783759	0.308042	0.50243	-1.73567	0.0241488	0.0435605	-0.43882	-0.352665	-0.761864	-1.4003	-1.64656	-2.05826	-3.14507	-1.1017
111198	-0.818945	0.122116	0.1927	-0.130282	0.849626	0.925286	-0.76986	0.276786	0.482973	-1.45852	0.0214495	0.0395216	3.87636	3.10846	3.22707	2.04938	2.29059	1.53196	2.25778	1.80519
111203	-0.721548	0.281461	0.369892	0.99157	0.114984	0.280206	2.01747	0.0206093	0.110459	0.304349	0.557145	0.615293	1.08317	2.49345	1.18155	0.921628	3.00561	3.14578	2.16758	2.00045
111211	-0.0928707	0.844884	0.881362	1.66173	0.0285705	0.144193	0.0197158	0.972032	0.983661	-1.73489	0.0135205	0.0294382	-0.295341	-0.530712	-0.0163865	-1.0259	-0.629976	-0.342509	-2.78662	-1.49598
111212	0.275361	0.276972	0.364814	-0.370623	0.159926	0.342461	-0.124142	0.609099	0.750955	0.521842	0.0646859	0.099317	5.09774	5.83016	5.66599	5.8124	5.64748	5.58296	5.95822	6.01295
111223	0.557576	0.471623	0.557964	-1.06234	0.241982	0.439753	-0.268008	0.775965	0.863743	1.35191	0.0725171	0.109537	0.190086	2.16673	1.72904	1.72133	2.05452	0.879883	2.47391	2.56703
111225	0.881168	0.00351114	0.0162375	-0.168581	0.426332	0.623768	0.289585	0.215569	0.433388	1.33933	0.000262384	0.00162607	3.1465	3.28497	3.83279	4.39074	4.31086	4.45911	4.61426	4.49433
111229	-0.248279	0.229126	0.315437	0.0162749	0.936692	0.967075	-0.0350592	0.866724	0.922022	-0.299613	0.149633	0.201084	5.14058	4.66887	4.76959	4.53306	4.70733	4.53741	4.57971	4.63036
111231	-1.00926	0.00062519	0.00540744	-0.285153	0.193202	0.386896	-0.232528	0.293828	0.487168	-0.956633	0.000593425	0.00276792	4.08163	4.09114	3.13456	3.01223	3.10183	2.59609	3.12827	3.13129
111232	1.43592	0.00078765	0.00622609	-0.37819	0.161853	0.345163	0.179639	0.476697	0.651028	1.99375	0.000129159	0.00105447	4.34209	3.65215	5.33702	5.53088	5.50518	5.71879	6.05049	5.93148
111233	1.34251	0.0138822	0.0372689	-0.318851	0.416788	0.614976	0.52056	0.252701	0.47854	2.18192	0.000672259	0.00302082	1.04139	0.190572	1.80304	2.14402	2.84807	2.13142	2.62842	2.98207
111237	2.27689	0.00622831	0.0205249	0.0687942	0.904611	0.956248	0.0119103	0.983678	0.991068	2.22	0.00654507	0.0168403	-5.78719	-5.74017	-4.10385	-2.83326	-3.43733	-3.51243	-3.37158	-3.71837
111238	2.2713	0.00552441	0.0187783	-0.962706	0.0935307	0.247318	0.024049	0.966118	0.98066	3.25805	0.000480855	0.00240146	-1.8803	-0.248312	0.850347	1.59301	1.31756	1.13142	2.16758	2.20446
111239	1.37587	0.123751	0.19479	2.2537	0.0609688	0.219723	-0.683412	0.452879	0.6355	-1.56124	0.137658	0.187139	-2.97984	-2.57024	-1.29649	-1.51133	-0.629976	-3.51243	-4.37158	-4.30334
111242	1.7941	0.00521456	0.0180235	0.862575	0.0889441	0.239239	0.494694	0.289907	0.482973	1.42622	0.0148992	0.0294382	-5.78719	-5.74017	-4.10385	-3.83326	-3.43733	-3.51243	-4.37158	-4.30334
111245	-0.0130635	0.973542	0.979946	0.238803	0.619426	0.777851	0.0502883	0.917546	0.953614	-0.201578	0.601704	0.656965	3.01047	2.28774	3.07606	2.14402	2.82946	2.55366	2.57093	2.32602
111262	1.3314	0.23246	0.318924	0.850046	0.457719	0.651693	0.1582	0.885219	0.933885	0.639554	0.556131	0.614286	-4.20223	-4.1552	-4.10385	-1.51133	-1.85237	-3.51243	-2.78662	-4.30334
111266	-0.402431	0.0257681	0.0588871	-0.351309	0.0559709	0.209158	-0.454994	0.0229094	0.116625	-0.506116	0.00938572	0.0223787	5.32198	5.33865	5.0835	4.76293	4.51104	4.43593	4.75512	4.89388
111273	1.28739	6.54815e-05	0.00171977	0.631946	0.00335373	0.0475058	0.56811	0.00645156	0.0619449	1.22356	7.3306e-05	0.000771587	2.86026	2.67769	4.14882	3.95464	4.66596	4.5856	4.05469	3.93028
111274	-0.917179	0.00209496	0.0116521	-0.999218	0.0018654	0.036441	0.322535	0.151407	0.349826	0.404575	0.0590382	0.0921633	7.25744	7.70679	6.62662	6.50101	6.77334	6.99898	7.92103	7.84863
111283	-1.82025	0.00305928	0.0149777	-1.13888	0.107546	0.269227	-1.38748	0.0626018	0.206242	-2.06885	0.0013897	0.00513703	3.97934	3.57498	2.40395	1.45214	1.20653	-0.0530023	1.46131	1.96345
111284	0.407159	0.67417	0.740898	0.862575	0.481141	0.670743	-0.861697	0.452712	0.63534	-1.31711	0.238807	0.299979	-3.46527	-2.57024	-4.10385	-1.0259	-3.43733	-3.51243	-4.37158	-4.30334
111286	0.105826	0.694168	0.758059	0.740028	0.0271566	0.140078	-0.183494	0.499848	0.668401	-0.817697	0.018503	0.0349757	6.16737	5.51073	5.69543	6.19326	5.68937	5.83408	4.9705	5.07388
111287	0.713486	0.00739893	0.0234005	1.10904	0.00119571	0.0290388	0.71319	0.010124	0.0768214	0.317641	0.131742	0.180475	3.06143	2.82589	3.50348	3.83208	4.19929	4.53741	3.25047	3.27409
111291	-0.59174	0.0865244	0.148044	-0.994243	0.104182	0.263929	-2.29422	0.00314571	0.0436473	-1.89172	0.00137176	0.00509123	2.57475	2.74767	2.08598	2.04938	0.263109	-0.705079	1.30085	0.220227
111306	0.99765	0.337232	0.427077	0.428616	0.637393	0.790542	1.64542	0.129745	0.318911	2.21446	0.0452904	0.0734393	-4.20223	-5.74017	-4.10385	-3.83326	-1.1154	-3.51243	-2.78662	-2.71837
111308	0.616757	0.0202548	0.0490188	-0.0781997	0.714446	0.842401	0.027223	0.899423	0.942658	0.722179	0.00977097	0.0230989	4.35619	4.49704	4.75724	5.34416	5.14387	4.99932	5.18109	5.11662
111313	-0.12477	0.524379	0.607315	0.159834	0.505576	0.691719	0.0272227	0.910097	0.949237	-0.257381	0.197789	0.255858	2.60082	2.34198	2.30554	2.39556	2.53995	2.21549	2.13622	2.29658
111320	0.278863	0.0585999	0.109255	0.393449	0.0242155	0.130786	0.377625	0.0325743	0.140872	0.263038	0.0605417	0.0942078	3.20433	3.10219	3.47358	3.38591	3.83879	3.78219	3.4422	3.39015
111323	-1.32556	0.000429823	0.00438119	-0.0502224	0.858303	0.929468	-0.508208	0.105126	0.279968	-1.78354	8.74697e-05	0.0008359	3.72258	3.96201	2.52551	2.50659	2.17738	1.84512	1.85724	2.26652
111330	-0.518982	0.0150292	0.0393915	-0.973076	0.00313853	0.0462052	-0.983541	0.00336035	0.044886	-0.529447	0.0112813	0.0258898	4.16846	4.13482	3.5472	3.72898	2.93771	2.37021	3.59996	3.64503
111336	1.7941	0.00521456	0.0180235	0.862575	0.0889441	0.239239	0.494694	0.289907	0.482973	1.42622	0.0148992	0.0294382	-5.78719	-5.74017	-4.10385	-3.83326	-3.43733	-3.51243	-4.37158	-4.30334
111338	0.628225	0.0225942	0.0532999	-0.157502	0.482287	0.671903	0.0242775	0.912469	0.950656	0.810005	0.00740047	0.0185455	4.42749	4.87705	5.06773	5.50025	5.29039	5.31951	5.55806	5.36718
111339	3.14308	0.00229939	0.0124357	2.42144	0.00439036	0.0533326	1.4146	0.0307629	0.13613	2.13624	0.0178656	0.0339938	-2.7168	-1.89217	0.191874	1.56112	2.36072	2.14463	0.337711	-0.689804
111341	-0.819653	0.0159233	0.0411031	-0.847075	0.0450991	0.186135	-0.712641	0.0877687	0.250564	-0.685219	0.023569	0.0426758	3.4631	3.23997	2.61944	2.43353	2.11726	1.53196	2.36989	2.97279
111358	-0.779119	0.188692	0.269051	0.550793	0.484605	0.673527	-0.627131	0.406062	0.594879	-1.95704	0.0140287	0.0294382	1.41248	0.702778	-0.196959	0.810597	0.0221008	-0.705079	-1.56422	-0.215872
111361	0.903102	0.106599	0.173894	1.89183	0.00799014	0.072525	0.0071802	0.988891	0.993842	-0.981547	0.0821145	0.121392	7.34707	5.78878	7.4387	7.51381	7.33498	7.63159	5.65494	5.52797
111363	-0.187076	0.162529	0.239216	0.198486	0.135288	0.309342	0.649292	0.00144073	0.0316543	0.26373	0.0583962	0.0912685	4.78361	4.97494	4.75724	4.62207	5.34075	5.34243	5.16952	5.11662
111366	0.20927	0.615687	0.688352	0.862575	0.0889922	0.239239	0.494694	0.289991	0.482973	-0.15861	0.702942	0.747533	-4.20223	-4.1552	-4.10385	-3.83326	-3.43733	-3.51243	-4.37158	-4.30334
111367	-1.28458	0.00196447	0.011155	-1.09712	0.00840645	0.0743973	-0.513502	0.139671	0.333824	-0.700963	0.0221152	0.0405043	5.15459	5.56076	3.79702	4.38106	3.82006	3.30775	4.6256	4.68819
111372	-1.06437	0.000294878	0.00356602	-0.898196	0.00128938	0.0300037	-0.282277	0.147055	0.343493	-0.448448	0.0149944	0.0295481	5.22193	5.14527	4.26684	3.95464	3.89359	3.78219	4.64801	4.82337
111374	-0.00929922	0.960178	0.970422	-0.658972	0.0188649	0.114151	-0.336478	0.174373	0.381784	0.313195	0.106051	0.150389	3.65368	4.02636	3.86769	3.78879	3.6607	3.33306	4.21714	4.08752
111376	0.725502	0.0753778	0.13262	-0.836798	0.0714754	0.239227	-0.802509	0.0858207	0.247243	0.759792	0.0600978	0.0936215	-2.02166	-2.0177	-1.38138	-1.20099	-2.05882	-2.13392	-0.965587	-1.55917
111380	-0.427586	0.0392252	0.0805423	-0.130198	0.456646	0.650576	0.482265	0.0319441	0.139257	0.184877	0.269674	0.332557	4.73146	4.57158	4.34323	4.09155	4.82476	4.59085	4.70791	4.96579
111383	1.09843	0.144162	0.219027	-0.723022	0.325744	0.530013	-0.102418	0.893768	0.939232	1.71904	0.02609	0.0463684	-1.53927	0.0411946	0.144078	0.559058	-0.267406	0.735494	1.35634	0.554646
111384	0.27505	0.116217	0.185387	0.0694426	0.692564	0.828467	0.000936938	0.995815	0.997364	0.206544	0.205535	0.264047	3.75777	3.99285	4.11047	4.19465	4.25616	4.04981	4.20207	3.95876
111390	-0.177189	0.643268	0.713772	0.201243	0.731748	0.856121	-0.998267	0.103105	0.276626	-1.3767	0.0159724	0.0310904	2.5482	3.43725	2.90738	2.7059	1.51687	2.10228	1.69451	1.52955
111391	0.0572336	0.751178	0.806228	0.519852	0.036843	0.165385	-0.0927274	0.645615	0.777213	-0.555346	0.019417	0.0364005	4.60298	4.23997	4.47735	4.47962	4.26311	4.50437	4.00346	3.72457
111394	1.8344	0.00169081	0.0100445	0.0329486	0.928	0.963686	0.536249	0.171154	0.377405	2.3377	0.000491259	0.00243812	4.01047	4.14401	5.36579	6.4533	6.28206	6.61427	6.54206	6.28819
11140	0.0480176	0.839475	0.877099	-0.216478	0.448983	0.644792	-0.111487	0.703958	0.816882	0.153008	0.496971	0.558021	3.32915	3.10219	3.60351	2.88099	3.10183	3.20181	3.38997	3.34772
111402	0.0540929	0.928566	0.946568	-2.6793	0.00192506	0.0369838	0.674039	0.300909	0.494581	3.40744	0.000430163	0.00223139	5.54875	7.46379	6.36477	6.74133	7.20201	7.25492	9.91779	9.89749
111411	0.203435	0.383095	0.473552	-0.140905	0.612278	0.772776	-0.227557	0.431468	0.618024	0.116783	0.595485	0.651724	2.87458	3.17571	2.97297	3.51547	3.0384	2.9633	3.01212	3.27409
111412	-0.100406	0.609467	0.683251	-0.0730912	0.750318	0.866619	-0.229502	0.342822	0.535867	-0.256816	0.207103	0.265747	4.10611	3.99962	3.79702	4.12674	3.43303	4.00327	3.82318	3.76813
111413	-0.445116	0.0443357	0.0883457	0.0919822	0.659111	0.807053	-0.303632	0.175361	0.382652	-0.840731	0.00295373	0.00907951	5.23725	4.77652	4.64098	4.47508	4.33746	4.18105	4.1637	4.16834
111414	0.277607	0.331089	0.421084	1.66867	0.00303457	0.0457076	0.0776972	0.807635	0.883506	-1.31336	0.00574245	0.0151877	3.85846	3.16973	3.80904	3.77407	3.98052	3.76369	2.3966	2.00045
111419	-0.15013	0.419225	0.508369	-0.104595	0.567448	0.738047	0.22378	0.241026	0.464539	0.178245	0.344621	0.408805	5.93005	5.52134	5.67324	5.47735	5.69555	5.90276	5.83177	5.97628
111422	-2.16428	0.0174233	0.0438096	-0.288859	0.791933	0.890067	-1.69779	0.138021	0.33174	-3.57321	0.00284581	0.00885035	1.7597	0.599685	-0.933924	-1.0259	-3.43733	-1.92747	-2.78662	-1.98141
111423	-0.409328	0.0100783	0.0292465	0.105972	0.381662	0.583739	0.208922	0.11056	0.288827	-0.306378	0.0332179	0.0567062	6.06026	5.99327	5.72111	5.51325	5.85038	5.80272	5.70122	5.73969
111427	3.83238	0.00178742	0.0104251	0.786079	0.636091	0.789393	-5.86809	0.00241818	0.0393383	-2.82179	0.0675005	0.103029	-1.86119	0.341771	2.4781	3.71979	-2.9519	-2.66444	-3.37158	-3.81791
111428	5.22221	0.00224553	0.0122442	-0.00184515	0.998038	0.999126	-0.35549	0.638825	0.771888	4.86857	0.00319335	0.00964943	-4.20223	0.0411946	2.97297	3.30629	3.19203	2.37021	2.88581	2.66245
111434	1.02926	0.181919	0.261846	-2.56772	0.00663877	0.065762	-0.394847	0.610051	0.751085	3.20214	0.00136708	0.00508332	6.07506	8.08151	7.55213	8.6817	7.73071	7.68048	10.3204	10.2253
111436	-0.314682	0.0673886	0.121511	0.341497	0.108098	0.269953	-0.535606	0.0209341	0.111598	-1.19178	0.000198253	0.00136546	4.47608	4.34065	4.2537	3.91493	3.55135	3.56438	3.17531	3.25891
111437	-0.668018	0.11679	0.186141	0.390254	0.348502	0.552279	0.0589124	0.883614	0.933089	-0.999359	0.0328867	0.0562373	5.8048	5.06799	5.2515	4.24889	4.78667	4.86694	4.41306	4.46154
111445	1.7941	0.00521456	0.0180235	0.862575	0.0889441	0.239239	0.494694	0.289907	0.482973	1.42622	0.0148992	0.0294382	-5.78719	-5.74017	-4.10385	-3.83326	-3.43733	-3.51243	-4.37158	-4.30334
111452	0.302089	0.0542801	0.10309	0.374728	0.0247792	0.132737	0.130896	0.340244	0.533589	0.0582571	0.663527	0.712153	6.04925	5.91268	6.40889	6.15968	6.3522	6.47625	6.03675	6.04207
111454	-0.0269974	0.799458	0.845651	-0.00519114	0.96081	0.977433	0.194677	0.10248	0.275951	0.172871	0.137355	0.186749	5.45419	5.35369	5.41382	5.33917	5.56548	5.57768	5.60999	5.54372
111460	1.44066	0.00016028	0.00260996	-0.0832902	0.647054	0.797525	0.360205	0.0996727	0.271367	1.88415	2.11486e-05	0.000427599	2.36762	2.06073	3.55193	3.77407	3.87555	4.1529	4.14017	4.05861
111467	-0.0534151	0.937741	0.95373	3.08158	0.0073154	0.0689306	1.11165	0.16359	0.366549	-2.02334	0.0335238	0.0570894	-1.53927	-1.49224	-0.933924	-2.2483	-1.1154	0.188006	-2.78662	-4.30334
111472	-0.719859	0.109882	0.177909	-0.243282	0.587748	0.75361	-0.558795	0.237354	0.460659	-1.03537	0.0348636	0.0589089	5.9076	5.47597	5.57739	4.33165	4.41442	4.41238	4.61994	4.69384
111477	0.97513	0.000957404	0.00709346	0.826167	0.0106304	0.0842163	-0.553725	0.0356605	0.148131	-0.404763	0.0800344	0.118847	1.74419	1.55446	2.6104	2.64247	2.23509	1.91383	1.30085	1.18852
111482	-0.233476	0.208868	0.292234	-0.127358	0.483372	0.672753	-0.110819	0.543614	0.704897	-0.216937	0.234604	0.295914	5.52512	5.21984	5.23377	5.04018	5.08231	4.97541	5.00563	5.30584
111485	0.0295288	0.906913	0.929736	0.746266	0.029316	0.146041	0.692263	0.0440445	0.166707	-0.0244741	0.918947	0.935404	3.06143	2.93579	3.314	2.7059	3.9973	3.45335	2.92304	3.02758
111486	1.52842	0.00590555	0.0197334	0.704642	0.0657857	0.228726	1.24649	0.0119204	0.0834006	2.07027	0.000752773	0.00328884	-0.172484	0.409582	2.06608	1.16674	3.07046	2.71638	2.18301	2.18852
111487	0.862913	0.0704655	0.125586	0.903473	0.0259087	0.135992	2.02787	0.00154214	0.0324973	1.9873	0.000900862	0.0037359	-0.501792	-0.185576	0.754132	0.254204	2.62876	2.46485	2.02074	1.25125
111488	1.05114	0.0312408	0.0677931	0.439646	0.297504	0.501113	0.528151	0.239923	0.4636	1.13964	0.0181798	0.034485	-0.412154	-0.454763	1.1056	0.0736314	1.42065	0.879883	0.672815	0.741059
111493	-0.235631	0.340942	0.430587	0.847449	0.0222843	0.124689	0.383188	0.2143	0.431773	-0.699892	0.0226338	0.0412706	1.22627	1.33985	1.01882	1.07843	1.15003	1.70091	0.665803	0.496788
111501	1.64593	0.0256576	0.0587021	1.0183	0.18599	0.377203	-0.857334	0.21824	0.436773	-0.2297	0.726429	0.768607	-1.26363	-1.6527	-0.0163865	0.414668	-0.629976	-0.705079	-0.67114	-2.71837
111504	1.63651	0.0140692	0.0376256	0.152926	0.794207	0.891456	-0.901626	0.143922	0.339647	0.581963	0.294179	0.358591	-1.69973	-1.2166	-0.40341	0.810597	-1.1154	-0.342509	-0.912148	-0.843904
111511	0.375108	0.027784	0.0621728	-0.839303	0.000396241	0.0182738	1.03925	0.00023817	0.0143576	2.25366	7.51078e-07	0.000202354	3.35491	3.34464	3.61725	3.84622	4.67641	4.84951	5.58987	5.61702
111517	-0.0572925	0.739315	0.79672	0.249249	0.183415	0.374549	0.280012	0.148123	0.345347	-0.0265296	0.874718	0.897888	5.07312	4.7386	5.00729	4.67849	5.14387	5.11327	4.85001	4.90855
111525	0.38134	0.0774376	0.135354	-1.39746	0.000254852	0.0148386	0.197996	0.336105	0.52929	1.97679	2.50633e-05	0.000456726	4.21421	4.48745	4.92129	4.52868	4.84344	5.01504	6.42689	6.22902
111530	0.725912	0.00759556	0.0238258	-0.242026	0.277125	0.480055	-0.146943	0.506749	0.673519	0.820995	0.00360415	0.0105672	3.55888	3.97892	4.3322	4.67239	4.34887	4.34654	4.64484	4.53379
111531	2.71029	0.00152213	0.00933615	2.71052	0.000818153	0.0244099	1.69609	0.00590446	0.059438	1.69586	0.0178402	0.0339563	-2.40868	-1.79531	0.0369293	1.24313	2.44433	2.16564	-0.242297	-0.576504
111534	-2.72112	0.000391304	0.00413426	-2.56178	0.00235243	0.0409824	-0.865808	0.185057	0.395565	-1.02515	0.011031	0.0254672	4.68955	4.84761	1.96224	2.14402	0.650132	1.69702	3.32191	4.17645
111540	0.875371	0.00106773	0.00754111	0.319556	0.102055	0.260422	0.0668688	0.704068	0.816887	0.622684	0.00559385	0.0148704	3.5143	3.23425	4.22258	4.28048	4.17	4.45911	3.95485	4.04096
111544	2.27689	0.00574122	0.0193786	0.862575	0.174582	0.362555	0.0119103	0.983399	0.990999	1.42622	0.0432871	0.0707192	-5.78719	-5.74017	-4.10385	-2.83326	-3.43733	-3.51243	-4.37158	-4.30334
111545	1.7941	0.0070974	0.0226752	1.10312	0.0492693	0.195311	0.735242	0.153299	0.35249	1.42622	0.0195414	0.0365532	-5.78719	-5.74017	-4.10385	-3.83326	-2.9519	-3.51243	-4.37158	-4.30334
111551	-0.737182	0.0178903	0.0446267	-0.257522	0.341523	0.545925	-0.075456	0.772079	0.861265	-0.555116	0.0518783	0.0824886	7.60369	7.2364	7.00663	6.36519	6.65146	6.56572	6.7506	6.98187
111554	0.443873	0.421922	0.510808	0.269976	0.626697	0.783273	0.555793	0.353616	0.545952	0.72969	0.18388	0.24034	3.24898	4.11314	3.37997	4.95138	4.48748	4.86694	4.35293	4.46815
111555	1.7941	0.0281544	0.0625911	0.0644103	0.918784	0.960091	0.494694	0.46015	0.64033	2.22439	0.0100314	0.0235776	-5.78719	-5.74017	-4.10385	-3.83326	-3.43733	-3.51243	-2.78662	-4.30334
111556	-1.36833	0.220687	0.305724	1.66128	0.221217	0.41907	0.480415	0.695878	0.811926	-2.54919	0.0518802	0.0824886	-0.657911	-2.93281	-2.51889	-3.83326	-3.43733	-1.92747	-4.37158	-4.30334
111558	2.96124	0.00742928	0.0234779	0.0634321	0.944595	0.970426	-1.72427	0.0778409	0.233386	1.17354	0.201401	0.259771	-4.20223	-2.03973	-0.196959	-0.132819	-1.85237	-1.92747	-1.20165	-2.71837
111563	-0.174947	0.525002	0.6078	0.712205	0.0437359	0.182592	0.277254	0.359759	0.551457	-0.609898	0.0571163	0.0895847	4.83211	4.19794	4.58615	4.06761	4.59058	4.64238	3.84274	3.96813
111564	3.90072	0.000169452	0.00268603	2.03292	0.0146109	0.0999405	-1.49095	0.0199017	0.108568	0.376855	0.557763	0.615861	-2.32776	-2.03973	1.51086	1.9481	0.263109	0.188006	-0.912148	-2.71837
111575	-1.31581	0.00139369	0.00880631	-1.30043	0.00665256	0.065787	-1.11812	0.0152725	0.0937719	-1.1335	0.00204594	0.00683086	4.61582	4.96633	3.58964	3.34665	2.34403	2.37021	3.36989	3.95405
111583	0.200277	0.349062	0.438799	-0.122378	0.55871	0.731647	0.438772	0.076568	0.231371	0.761426	0.00652062	0.0167991	4.51659	4.2414	4.78793	4.35162	4.84344	5.18801	5.11425	5.16631
111588	1.9309	0.00158274	0.00959449	1.15014	0.0287061	0.14441	0.0334005	0.931533	0.960586	0.814163	0.0820006	0.121284	-0.516665	-0.996004	0.767009	1.64053	1.27196	1.15091	-0.0239139	0.146886
111593	1.38988	0.00361321	0.0165874	0.485699	0.174997	0.362885	0.328604	0.349503	0.541776	1.23278	0.00564182	0.014962	-0.232605	0.142478	1.62407	1.02472	1.42065	1.91383	1.18301	1.18852
111594	1.86128	0.000156254	0.002591	0.345648	0.140124	0.314799	0.722904	0.0160919	0.0963984	2.23853	3.58867e-05	0.000530331	1.7337	1.72744	3.56149	3.62617	3.9973	4.62199	4.01644	3.92067
111598	0.295793	0.187373	0.267586	0.251152	0.26886	0.469856	0.156533	0.482909	0.653589	0.201174	0.343949	0.408208	4.71365	4.25843	4.75102	4.8142	4.92461	4.95109	4.88345	4.48783
111603	-0.189589	0.535845	0.617538	-0.0425062	0.901937	0.954729	0.280885	0.456932	0.638859	0.133803	0.625744	0.678557	1.57913	2.12402	1.45074	1.89466	1.77212	2.10228	2.03781	1.92548
111606	1.4043	0.0191327	0.0470475	-0.956142	0.105691	0.266427	-0.57501	0.321234	0.515565	1.78543	0.00457917	0.0126785	1.26809	2.63052	3.24488	3.46136	2.53995	2.99536	3.84274	3.60955
111607	1.70223	0.000569764	0.0051894	-0.824871	0.0166691	0.106796	0.049606	0.864501	0.921064	2.57671	2.83285e-05	0.000478936	1.33175	1.98093	3.24488	3.47962	3.33085	3.47625	4.37996	4.07604
111616	-2.15927	0.000292448	0.00354742	-0.677026	0.0914192	0.243156	-0.441078	0.24037	0.463955	-1.92333	0.000546175	0.00261393	7.36335	7.75868	5.4603	5.33917	4.99312	4.92636	5.15785	6.11346
111619	2.24218	0.000231352	0.00315591	0.0381293	0.8857	0.945963	0.508359	0.115392	0.296325	2.71241	4.99715e-05	0.000631771	-0.00583417	0.798994	2.71633	2.54178	2.97206	3.30775	3.12827	3.08037
111625	-0.503693	0.0635219	0.116449	-0.321879	0.21474	0.413675	-0.273882	0.287014	0.482973	-0.455696	0.0831552	0.122748	5.88213	5.39233	5.386	4.87064	4.85269	4.86694	5.18109	5.18249
111629	-0.250558	0.362714	0.452909	-0.028257	0.923937	0.962121	0.341669	0.304041	0.497604	0.119368	0.621725	0.674996	3.25447	3.13942	2.6104	3.32661	3.07046	3.49879	3.48017	3.14788
111634	1.7941	0.00521456	0.0180235	0.862575	0.0889441	0.239239	0.494694	0.289907	0.482973	1.42622	0.0148992	0.0294382	-5.78719	-5.74017	-4.10385	-3.83326	-3.43733	-3.51243	-4.37158	-4.30334
111635	1.7941	0.00521456	0.0180235	0.862575	0.0889441	0.239239	0.494694	0.289907	0.482973	1.42622	0.0148992	0.0294382	-5.78719	-5.74017	-4.10385	-3.83326	-3.43733	-3.51243	-4.37158	-4.30334
111642	-0.765923	0.00285762	0.0143373	0.0628873	0.707991	0.838352	0.545658	0.0182232	0.103179	-0.283152	0.104037	0.147974	4.86296	4.86068	4.25809	3.91493	4.53995	4.74023	4.47077	4.68819
111644	-0.811785	0.0322507	0.0695223	-0.0728892	0.81887	0.906934	-0.197572	0.540903	0.702663	-0.936468	0.0184137	0.0348384	6.58431	6.21439	6.03186	5.14116	5.47256	5.31093	5.37157	5.5562
111645	1.7941	0.0666765	0.120584	0.874996	0.28547	0.489083	1.2934	0.145845	0.341876	2.21251	0.0287219	0.0502676	-5.78719	-5.74017	-4.10385	-3.83326	-3.43733	-1.92747	-4.37158	-2.71837
111649	-0.261699	0.294263	0.383568	-0.0946709	0.719196	0.845829	0.407367	0.185672	0.396287	0.240339	0.276803	0.340014	2.81643	3.01806	2.33909	3.01223	3.00561	3.11692	3.26505	3.04539
111653	3.04375	0.000328619	0.0037861	0.101533	0.741481	0.862268	1.05511	0.0201775	0.109422	3.99733	4.20403e-05	0.000576111	-1.14334	-0.0677398	2.08598	2.82495	3.40816	3.56438	3.48017	3.28912
111658	0.696064	0.00580065	0.0195033	0.847604	0.00620384	0.0632357	-0.355262	0.113995	0.294004	-0.506801	0.0331639	0.0566301	3.73048	3.95158	4.62747	4.4382	3.98052	4.37631	3.46762	3.19651
111661	-0.390753	0.108169	0.175852	0.92091	0.00855764	0.0749852	0.66943	0.0337544	0.144045	-0.642233	0.0191119	0.0359413	1.43197	1.39939	1.02543	1.02472	1.69195	1.69702	0.985972	0.554646
111665	1.82991	4.377e-06	0.000615475	0.644946	0.00136495	0.0307423	0.685122	0.00119065	0.0285949	1.87008	3.12512e-06	0.000242508	2.32655	2.52193	4.26684	4.2382	4.95069	4.92636	4.3461	4.2397
111668	-0.15667	0.238099	0.324979	-0.485861	0.00701873	0.0678358	-0.132692	0.323194	0.517179	0.196498	0.148697	0.20014	5.33628	5.44657	5.19307	5.27788	5.14387	5.06121	5.69316	5.48293
111670	0.664942	0.110932	0.179075	-0.769447	0.152556	0.332801	-1.70747	0.0093894	0.0746151	-0.273081	0.491782	0.552722	-0.832998	-0.57024	-0.0163865	-0.0613736	-1.85237	-1.64059	-0.464689	-1.49598
111672	0.158035	0.724293	0.783786	-0.722745	0.243117	0.440891	-1.33603	0.0512784	0.182704	-0.455255	0.335984	0.401432	-0.00583417	-0.695771	-0.0163865	-0.373828	-1.1154	-1.92747	-1.20165	-0.396445
111673	-1.02408	0.248724	0.336075	-0.307132	0.756173	0.869271	-0.318293	0.752103	0.848285	-1.03524	0.233013	0.294033	-1.69973	-2.57024	-2.51889	-3.83326	-3.43733	-3.51243	-2.04965	-4.30334
111677	0.0239082	0.819035	0.86117	0.375675	0.00826034	0.0737989	0.5915	0.000841321	0.0250424	0.239734	0.0518566	0.082473	5.4253	5.39747	5.42558	5.44519	6.04447	6.00917	5.59276	5.70929
111688	0.0511846	0.783571	0.833155	-0.059071	0.815901	0.904964	-0.588297	0.0481988	0.176202	-0.478041	0.0386987	0.0642519	2.18435	2.17272	2.30554	2.14402	1.84807	1.44176	1.55916	1.84641
111691	-1.49047	0.0024752	0.0130379	-0.440998	0.308078	0.51108	-0.434441	0.329964	0.524148	-1.48392	0.00181723	0.0062311	3.94921	4.30559	2.99418	2.23283	2.23509	2.17126	2.34267	2.95405
111696	1.07707	0.050326	0.0970987	0.621806	0.2208	0.41907	0.494694	0.322454	0.516689	0.949961	0.073307	0.110521	-4.9392	-5.1552	-4.10385	-3.83326	-3.43733	-3.51243	-4.37158	-3.81791
111699	0.0539911	0.74203	0.79914	-0.0697519	0.679298	0.820077	0.252581	0.180177	0.389248	0.376324	0.0451313	0.0732309	4.6062	4.32458	4.65437	4.37131	4.73759	4.80498	4.76541	4.91825
111702	-0.233386	0.522266	0.605218	1.30569	0.0493651	0.195365	-0.578644	0.260958	0.482973	-2.11772	0.00249642	0.00798427	1.47019	1.64354	1.02543	1.65859	0.46956	1.01113	-1.20165	0.0889822
111709	2.24304	0.0125047	0.034405	-0.904859	0.210026	0.408351	-0.576958	0.422083	0.610073	2.57094	0.00561369	0.0149198	-3.46527	-2.03973	-0.644418	-0.373828	-1.85237	-0.342509	0.0207379	-0.396445
111711	2.89742	0.000197163	0.00287343	0.557814	0.1843	0.376035	0.588778	0.163345	0.366345	2.92838	0.000188809	0.00133429	3.29761	4.195	6.21921	7.06232	7.13537	7.32913	6.72052	6.62814
111715	-0.176694	0.335619	0.425547	-0.458039	0.0436734	0.182523	0.130946	0.515426	0.680922	0.412292	0.0403202	0.0665885	8.06035	7.64448	7.76382	7.58828	7.78365	7.83242	8.20939	8.32397
111720	0.897825	0.00463602	0.0180235	0.00819314	0.969518	0.981733	0.565033	0.0391321	0.156423	1.45466	0.000276311	0.00168225	3.35491	3.71311	4.21356	4.67057	4.86188	5.12781	5.04838	4.92789
111726	0.604705	0.390973	0.481248	-0.0017485	0.998149	0.999153	-0.271304	0.721251	0.828651	0.335149	0.625469	0.678444	-3.46527	-4.1552	-4.10385	-2.2483	-3.43733	-3.51243	-3.6404	-3.30334
111728	1.7941	0.00521456	0.0180235	0.862575	0.0889441	0.239239	0.494694	0.289907	0.482973	1.42622	0.0148992	0.0294382	-5.78719	-5.74017	-4.10385	-3.83326	-3.43733	-3.51243	-4.37158	-4.30334
111733	-0.202905	0.15591	0.232154	-0.534017	0.00822018	0.0737085	-0.398883	0.0307924	0.136176	-0.0677711	0.5965	0.652477	4.80058	4.71208	4.5364	4.57188	4.31086	4.00327	4.73433	4.64211
111734	-2.16979	0.000726877	0.00592623	-1.14618	0.0355029	0.16214	-0.783891	0.126141	0.313112	-1.8075	0.0013885	0.00513703	6.15422	6.63948	3.91296	4.57188	3.38285	3.49879	4.17917	5.00273
111742	-0.803382	0.00166251	0.00991667	-0.56478	0.0204461	0.119991	-0.741385	0.00659999	0.0624704	-0.979987	0.000523796	0.00254765	5.29029	4.97665	4.24045	4.42884	3.68161	3.49879	4.17917	4.12712
111745	1.92274	0.000127333	0.00230629	-0.449363	0.0957217	0.250996	0.317725	0.209003	0.425275	2.68983	1.89882e-05	0.00040777	3.45836	3.76961	5.28201	5.79427	6.04447	5.66499	6.38414	6.22316
111747	-1.56484	0.000952825	0.00707711	-0.424573	0.195446	0.389937	-0.335681	0.302313	0.495797	-1.47595	0.00113593	0.00442796	6.13725	6.43007	4.4079	5.05244	4.59058	4.18105	4.60856	5.00728
111753	-0.601309	0.169185	0.247172	0.673855	0.146251	0.324392	0.192798	0.651243	0.781544	-1.08237	0.030022	0.0522062	6.75753	7.14801	5.71473	6.9749	6.54424	6.54149	5.66871	6.06844
111760	0.152486	0.222924	0.308393	0.546356	0.00252376	0.0420134	0.254455	0.0630504	0.206914	-0.139415	0.259532	0.32198	5.09315	5.2364	5.36579	5.2674	5.5711	5.57237	5.09399	4.95641
111761	0.0549279	0.797763	0.844274	-0.397703	0.100525	0.258425	0.0445285	0.834168	0.902114	0.49716	0.0524615	0.0832244	5.5521	6.03091	6.04463	5.64854	5.96994	5.81175	6.25139	6.32511
111766	-0.226587	0.289837	0.378873	-1.10665	0.00511179	0.0573982	-0.801403	0.0258478	0.123903	0.0786579	0.671393	0.719452	1.87814	1.96719	1.56858	1.83917	0.650132	1.13142	1.9322	2.0717
111769	0.344753	0.0965703	0.161347	0.148553	0.515136	0.699611	-0.138657	0.545419	0.705652	0.0575421	0.751817	0.791959	2.71663	2.54985	2.99418	2.96116	2.71242	2.9633	2.88581	2.49108
111774	3.03179	0.000331251	0.00379809	-0.499746	0.195485	0.389937	0.566541	0.192927	0.405419	4.09808	3.34773e-05	0.000514426	-2.97984	-3.41824	-0.196959	-0.132819	0.810597	-0.00147201	1.05469	0.741059
111777	-0.155568	0.498124	0.58256	-0.391388	0.213714	0.412565	-0.658993	0.0588948	0.198957	-0.423172	0.0927625	0.13424	3.84762	3.46196	3.67094	3.30629	2.58504	3.08748	3.20585	3.25891
111780	-0.607575	0.0807545	0.140039	0.182702	0.689431	0.826126	-0.731356	0.127063	0.314653	-1.52163	0.00297442	0.00912771	2.08932	2.69029	1.67751	1.89466	1.08623	1.01113	0.985972	0.741059
111786	1.12953	0.000402879	0.00421257	-0.0497532	0.765404	0.875334	0.558612	0.0181849	0.103114	1.7379	1.67259e-05	0.0003916	1.47019	1.51722	2.49606	2.76665	3.13252	3.22903	3.17531	3.28912
111788	-0.0896965	0.634737	0.706275	0.236398	0.266436	0.467385	0.0252543	0.901333	0.94396	-0.30084	0.139467	0.189253	4.46429	4.75469	4.31822	4.74039	4.63413	4.45911	4.33923	4.27787
111789	0.0849331	0.750527	0.805602	0.478836	0.162002	0.345298	0.262267	0.424718	0.612668	-0.131636	0.61534	0.668914	1.86386	1.80673	2.27119	1.52429	1.98893	2.37021	1.77817	1.6274
111793	0.0413977	0.780673	0.830936	0.135995	0.482304	0.671903	-0.263532	0.194515	0.407373	-0.358129	0.044935	0.0729819	2.96435	2.86346	2.86193	3.06156	2.79149	2.59609	2.5942	2.51684
111801	0.339069	0.0188054	0.0463859	0.231355	0.0721539	0.239239	0.260849	0.0497465	0.179371	0.368563	0.0130063	0.0288877	5.03697	5.06799	5.39001	5.39315	5.60979	5.69458	5.5034	5.33872
111806	-0.914538	0.48162	0.567652	1.08399	0.46272	0.655391	0.692295	0.634374	0.768432	-1.30624	0.325098	0.389948	-2.61727	-1.09631	-1.78192	-3.83326	-0.629976	-3.51243	-2.04965	-4.30334
111807	-0.135466	0.344616	0.434308	0.52565	0.00731289	0.0689306	0.193095	0.197206	0.410231	-0.468021	0.0118117	0.0267878	6.45449	6.21003	6.21017	6.18494	6.46203	6.31887	5.7718	5.95758
111810	-0.278389	0.361355	0.451543	0.124155	0.774648	0.880255	-0.888356	0.0632133	0.207052	-1.2909	0.00585311	0.0154086	3.64952	3.31783	3.15354	3.26477	2.53995	2.10228	1.69451	2.70789
111813	-0.802537	0.0408263	0.0831717	-0.387992	0.334004	0.53765	-0.876676	0.0537221	0.187988	-1.29122	0.00588381	0.0154718	5.80011	5.32928	5.18617	4.30629	3.77212	3.99536	4.13225	4.41776
111814	0.059597	0.822483	0.863806	0.242594	0.401897	0.601283	0.235802	0.427231	0.614787	0.052805	0.836879	0.865222	4.43076	4.0688	4.57211	4.01849	4.79629	4.30135	4.17917	4.42798
111822	1.2329	0.0152392	0.0398282	0.835303	0.0595448	0.217082	0.85595	0.0630618	0.206914	1.25355	0.011739	0.0266889	0.842163	1.64354	2.08598	2.90821	3.45749	3.20181	2.57093	2.41091
111823	-0.694152	0.02746	0.0616354	0.12788	0.625447	0.782448	-0.247334	0.358177	0.55029	-1.06937	0.0041622	0.0117865	6.593	6.13058	5.8372	5.4999	5.6842	5.16352	5.18875	5.39884
111826	0.410461	0.380822	0.471426	-1.6422	0.0328904	0.156095	-1.27911	0.0866573	0.248312	0.773547	0.0949857	0.137042	1.24623	2.40449	2.30554	2.14402	0.650132	1.24245	2.5942	2.59148
111830	0.185279	0.466686	0.553494	0.227476	0.46163	0.654707	-0.0894253	0.768359	0.858865	-0.131622	0.599746	0.655246	3.3752	3.09589	3.09582	3.78879	3.35709	3.30775	3.25047	2.95405
111832	-0.660905	0.00109226	0.00764199	-0.324022	0.0460479	0.18894	-0.5757	0.00421166	0.0499209	-0.912583	0.000173287	0.00126815	5.45895	5.43663	4.70672	4.87293	4.22801	4.19493	4.61426	4.45489
111833	0.0404579	0.862558	0.894477	0.399968	0.128862	0.3	0.260937	0.300566	0.494244	-0.0985733	0.671204	0.719358	5.07622	4.57838	5.1129	4.60553	5.15138	5.10595	4.70256	4.75466
111834	-0.723487	0.0672979	0.121479	-0.426523	0.421103	0.619077	-1.37594	0.0265564	0.125885	-1.67291	0.00309587	0.00943624	4.69158	3.99285	3.58964	3.65056	1.92022	2.55366	2.28663	3.06299
111836	-0.496751	0.189878	0.270272	0.0964121	0.793311	0.891029	-0.0925461	0.802856	0.880133	-0.685709	0.0849387	0.12505	5.03219	5.84808	4.59312	5.31395	4.83413	4.86694	4.59709	4.91341
111843	3.99702	0.000451025	0.00450808	-0.357288	0.531116	0.711085	-0.546716	0.352518	0.544694	3.8076	0.000563239	0.00266991	-5.78719	-4.1552	-0.933924	-1.0259	-1.1154	-1.92747	-1.20165	-1.13341
111847	-0.298603	0.0266406	0.0603496	-0.430452	0.00608267	0.0625347	-0.196037	0.113027	0.29239	-0.064188	0.555872	0.614115	5.72258	5.57442	5.34117	5.35903	5.15138	5.15645	5.55768	5.61105
111848	-0.534744	0.0467788	0.0919681	0.459252	0.0844807	0.239239	0.275754	0.268311	0.482973	-0.718242	0.0142255	0.0294382	5.33628	4.86624	4.76343	4.35162	4.9763	4.71157	4.39991	4.36555
111851	0.0564563	0.649546	0.719257	-0.207667	0.135696	0.309746	-0.225988	0.111124	0.289412	0.0381355	0.756611	0.79621	5.3298	5.24639	5.31611	5.37376	5.22445	5.01504	5.39163	5.26081
111867	-0.161393	0.208009	0.291202	0.22882	0.0969729	0.253047	0.291458	0.0498821	0.179704	-0.0987549	0.410141	0.473676	4.89843	4.71824	4.70028	4.58881	4.94205	4.93465	4.68641	4.73284
111871	-0.0249985	0.812774	0.856433	-0.0711193	0.511613	0.696654	-0.0890117	0.413759	0.602713	-0.0428909	0.687371	0.73418	6.28024	6.23389	6.27877	6.18633	6.14951	6.13682	6.26957	6.15917
111872	-0.291017	0.404424	0.494337	0.367506	0.46967	0.66116	-0.944743	0.0761324	0.230852	-1.60327	0.00461208	0.0127396	1.26809	0.97408	0.850347	0.810597	-0.629976	0.394457	-0.123652	-0.843904
111873	-1.16693	0.00756385	0.0237835	-0.0939328	0.792415	0.890442	0.0828693	0.825644	0.89655	-0.990129	0.01105	0.0254971	4.72949	4.2414	3.6577	2.93493	3.27691	3.52099	3.29376	3.70229
111874	3.81113	1.9425e-05	0.0010539	-0.142905	0.583639	0.750357	0.536608	0.0778912	0.233478	4.49064	6.63584e-06	0.00028187	0.441625	1.57272	4.71952	4.91157	5.28718	5.40941	5.61284	5.37086
111876	-0.143561	0.531432	0.613638	-0.993578	0.00780601	0.0717816	-0.227001	0.44936	0.632961	0.623016	0.0139297	0.0294382	1.94752	1.55446	1.62407	1.59301	1.42065	1.34555	2.3966	2.35488
111878	-0.442735	0.254262	0.341303	0.445767	0.256623	0.457035	0.291296	0.449554	0.632961	-0.597207	0.135472	0.184799	5.63435	4.9835	5.32032	4.38106	5.28718	5.0306	4.59132	4.83366
111880	0.75	0.000715832	0.00587179	-0.212333	0.127059	0.297663	0.0853435	0.501198	0.669304	1.04768	0.000114843	0.000980516	5.03219	5.14171	5.84013	5.83385	6.02005	5.82519	6.21432	6.05532
111882	-0.96433	0.409122	0.498803	-1.4351	0.248342	0.447293	0.419285	0.750339	0.847439	0.890059	0.374708	0.438506	-1.26363	-2.03973	-4.10385	-1.0259	-0.852368	-3.51243	-0.912148	-0.602895
111886	0.576427	0.0231975	0.0543125	-0.179654	0.432201	0.629347	0.031257	0.894078	0.939329	0.787338	0.00423778	0.0119495	2.77123	2.99793	3.44305	3.47962	3.68161	3.30775	3.85242	3.48457
111891	0.389517	0.0217439	0.0516899	0.346621	0.0329778	0.156324	0.633285	0.00221475	0.0378729	0.676181	0.00174411	0.00603651	5.37834	5.17944	5.69219	5.6445	6.24391	6.35947	6.05783	5.85275
111899	-0.108945	0.415221	0.504641	-0.201102	0.161173	0.344184	0.24558	0.107477	0.283565	0.337737	0.030015	0.0522015	4.72555	4.8828	4.80003	4.58206	4.8891	4.99139	5.1382	5.14581
111903	-1.60534	0.119076	0.189052	0.496519	0.645554	0.796664	0.467343	0.670896	0.795926	-1.63451	0.105647	0.149905	-1.8803	-1.2166	-2.51889	-3.83326	-1.85237	-3.51243	-4.37158	-1.98141
111905	1.80076	0.0300657	0.0659192	0.435235	0.512054	0.697066	0.489074	0.473993	0.650222	1.8546	0.0244208	0.0439781	-3.46527	-4.1552	-1.78192	-2.2483	-1.85237	-1.19051	-1.20165	-2.71837
111906	0.115132	0.827101	0.867893	-1.10554	0.121408	0.289651	-1.20105	0.101112	0.273617	0.0196236	0.969663	0.976453	-1.36765	-1.46964	-1.59289	-0.9933	-3.43733	-1.58643	-1.43801	-1.35848
111907	0.744891	0.00394894	0.017669	0.297743	0.119743	0.287394	0.717066	0.00663621	0.062536	1.16421	0.000226143	0.00149212	2.60941	2.87086	3.37997	3.60137	4.31086	4.0949	3.96381	3.84132
111911	0.519529	0.0279377	0.0623643	0.334968	0.114553	0.279611	0.560043	0.0245518	0.120551	0.744604	0.00496419	0.0135187	3.88346	4.11626	4.70028	4.32156	4.91582	5.23911	4.70791	4.78147
111913	-0.771805	0.103417	0.169979	0.862575	0.107312	0.269105	0.494694	0.320203	0.51474	-1.13969	0.0295349	0.0514866	-2.97984	-3.41824	-4.10385	-3.83326	-3.43733	-3.51243	-4.37158	-4.30334
111916	-1.19858	0.000395695	0.00415993	-0.5901	0.0325725	0.155329	-0.793292	0.0102444	0.0774393	-1.40177	0.000147747	0.00114471	5.24967	5.32525	4.12977	4.04326	3.63948	2.9633	3.90919	3.86157
111924	1.16694	0.0500679	0.0967948	1.1254	0.0775601	0.239239	0.0511661	0.923438	0.956411	0.0927055	0.859383	0.884428	-3.28639	-3.62247	-1.98615	-2.60675	-2.70615	-1.77259	-3.6404	-3.07683
111926	-0.131526	0.53003	0.612197	-0.109363	0.613771	0.77368	-0.0696211	0.750419	0.847439	-0.0917843	0.652501	0.702811	5.23031	4.78242	5.07357	4.6626	4.78667	4.82296	4.92992	4.89879
111932	0.0616239	0.703126	0.765531	-0.0580574	0.742117	0.862335	0.201339	0.301029	0.494711	0.32102	0.0648208	0.0994858	3.73833	3.55904	3.73535	3.68244	3.72254	4.0949	3.90919	4.03206
111935	-0.0675929	0.701566	0.764041	0.0766323	0.679793	0.820438	-0.0164229	0.930006	0.95991	-0.160648	0.368677	0.432484	4.79306	4.85696	4.52915	5.00279	4.66596	4.814	4.68641	4.64211
111938	0.285398	0.0895012	0.152048	-0.183049	0.289517	0.493035	-0.103788	0.547771	0.707386	0.364659	0.0352428	0.0593898	4.03776	3.74968	4.19536	4.16109	3.98052	4.16705	4.22461	4.29285
111943	-0.286255	0.622005	0.694284	-0.29409	0.655966	0.804522	-0.763263	0.267908	0.482973	-0.755428	0.220354	0.28007	5.51716	4.99031	5.86338	4.01849	4.22801	4.18105	4.4957	4.5008
111950	0.106764	0.578244	0.656145	0.442528	0.0487069	0.193891	0.317468	0.127155	0.314724	-0.0182961	0.92328	0.939255	5.86341	5.70743	6.15	5.63638	6.22978	6.18974	5.81701	5.71764
111958	1.37246	0.000701878	0.00580503	0.423465	0.0705672	0.237377	1.02899	0.00296775	0.0423163	1.97798	4.8093e-05	0.000621142	1.35236	1.55446	3.01509	2.60968	4.04648	3.66748	3.42932	3.43137
[truncated: 10,003 more rows]
