# Supplementary material for: A Mucoralean White Collar-1 Photoreceptor Controls Virulence by Regulating an Intricate Gene-Network during Host Interactions.
Source: Preprints.org preprint supplement (doi:10.20944/preprints202012.0804.v1), 2020-12-31
Supplement: Supplementary file 3 [file tableS2.xlsx]

## Sheet: cluster1
GeneID	log2FC_WC1aM.R7BM	adj_pvalue	KOG.Class	KOG.def	GOs	iprDesc	EC	KEGG_ko	KEGG_Pathway	KEGG_Module	KEGG_Reaction	KEGG_rclass	BRITE	KEGG_TC	CAZy	BiGG_Reaction	hmm_signalpep_probability
10078	-1.06226	0.0317583	Signal transduction mechanisms	GTPase-activator protein for Rho-like GTPases	GO:0000003,GO:0000131,GO:0000278,GO:0000281,GO:0000746,GO:0000747,GO:0000755,GO:0000910,GO:0000917,GO:0003674,GO:0005096,GO:0005575,GO:0005622,GO:0005623,GO:0005737,GO:0005739,GO:0005933,GO:0005934,GO:0005935,GO:0005937,GO:0006109,GO:0006996,GO:0007010,GO:0007049,GO:0008047,GO:0008150,GO:0008360,GO:0009272,GO:0009889,GO:0009966,GO:0009968,GO:0009987,GO:0010556,GO:0010646,GO:0010648,GO:0010675,GO:…	Zinc finger, LIM-type|Zinc finger, LIM-type|RhoGAP|Zinc finger, LIM-type|RhoGAP|Zinc finger, LIM-type|RhoGAP|Zinc finger, LIM-type|Rho GTPase activation protein											NA
104136	-3.32867	0.00475788	Transcription	PAS fold		Zinc finger, GATA-type|PAS fold-3|PAC motif|PAS|Zinc finger, GATA-type|PAS|PAS|PAS-associated, C-terminal|Zinc finger, GATA-type|Zinc finger, GATA-type											NA
104771	-1.83827	0.034298	Function Unknown			NA											NA
104932	-1.16787	0.0123369	Chromatin structure and dynamics	Core component of nucleosome. Nucleosomes wrap and compact DNA into chromatin, limiting DNA accessibility to the cellular machineries which require DNA as a template. Histones thereby play a central role in transcription regulation, DNA repair, DNA replication and chromosomal stability. DNA accessibility is regulated via a complex set of post-translational modifications of histones, also called h…	GO:0000003,GO:0000122,GO:0000228,GO:0000785,GO:0000786,GO:0000788,GO:0000790,GO:0003006,GO:0003674,GO:0003676,GO:0003677,GO:0005488,GO:0005515,GO:0005575,GO:0005622,GO:0005623,GO:0005634,GO:0005657,GO:0005694,GO:0006323,GO:0006325,GO:0006333,GO:0006334,GO:0006342,GO:0006355,GO:0006357,GO:0006464,GO:0006479,GO:0006807,GO:0006996,GO:0007049,GO:0008150,GO:0008152,GO:0008213,GO:0009653,GO:0009889,GO:…	Histone H4|Histone H4|Histone core|Histone H4|Histone H4|Histone-fold		ko:K11254	ko05034,ko05203,ko05322,map05034,map05203,map05322				ko00000,ko00001,ko03036				NA
105084	-1.30112	0.0307442	Function Unknown	Retinoic acid induced 16-like protein		NA											NA
105622	-1.3947	0.0428611	Function Unknown			NA											NA
106022	-1.2688	0.0498644	Transcription	helix loop helix domain		Basic helix-loop-helix dimerisation region bHLH|Basic helix-loop-helix dimerisation region bHLH|Basic helix-loop-helix dimerisation region bHLH|Helix-loop-helix DNA-binding											NA
106025	-2.14515	0.0270197	Function Unknown			NA											NA
106369	-1.13955	0.0291117	Function Unknown			Esterase, SGNH hydrolase-type											0.025
106602	-2.22541	0.0413371	Function Unknown			Peptidase S8 and S53, subtilisin, kexin, sedolisin											NA
106722	-1.61989	0.0447078	Function Unknown			NA											NA
106921	-1.48355	0.0277775	Function Unknown	NA	NA	NA	NA	NA	NA	NA	NA	NA	NA	NA	NA	NA	NA
107636	-2.01127	0.0468656	Function Unknown	Protein of unknown function (DUF3759)		Ricin B-related lectin											NA
107672	-2.37331	0.0489492	Function Unknown			NA											NA
108126	-1.30666	0.0393672	Signal transduction mechanisms	thienylcyclohexylpiperidine binding		HEAT|Lipocalin|Armadillo-type fold|Galactose-binding like											NA
108714	-1.13002	0.044886	Cytoskeleton	Tubulin binding cofactor A		Tubulin binding cofactor A|Tubulin binding cofactor A|Tubulin binding cofactor A		ko:K17292					ko00000,ko04147,ko04812				NA
109171	-2.24445	0.0285949	Function Unknown			NA											NA
109497	-1.08874	0.0446792	Function Unknown	NA	NA	NA	NA	NA	NA	NA	NA	NA	NA	NA	NA	NA	NA
109683	-1.33083	0.0112735	Function Unknown			NA											NA
109717	-1.56236	0.0225804	Function Unknown	NA	NA	NA	NA	NA	NA	NA	NA	NA	NA	NA	NA	NA	NA
109819	-2.44616	0.0417622	Function Unknown	Galactose oxidase, central domain		Kelch repeat type 1|Legume lectin, beta domain|Galactose oxidase/kelch, beta-propeller											NA
109992	-1.67289	0.0131954	Function Unknown	Ricin-type beta-trefoil		Ricin B lectin|Ricin B lectin|Ricin B lectin|Ricin B-related lectin											NA
110009	-1.84029	0.0146135	Transcription	helix loop helix domain		Basic helix-loop-helix dimerisation region bHLH|Basic helix-loop-helix dimerisation region bHLH|Basic helix-loop-helix dimerisation region bHLH|Helix-loop-helix DNA-binding											NA
110018	-1.97723	0.0484844	Function Unknown			NA											NA
110199	-1.02489	0.0133471	Function Unknown	Mortierella verticillata NRRL 6337		Cytochrome b5											NA
110235	-2.08022	0.0433592	Function Unknown	Pleckstrin homology domain.		Pleckstrin-like											NA
110352	-1.146	0.0080245	Chromatin structure and dynamics	Histone H2B	GO:0000122,GO:0000228,GO:0000785,GO:0000786,GO:0000788,GO:0000790,GO:0003674,GO:0003676,GO:0003677,GO:0005488,GO:0005575,GO:0005622,GO:0005623,GO:0005634,GO:0005657,GO:0005694,GO:0006139,GO:0006259,GO:0006281,GO:0006301,GO:0006325,GO:0006333,GO:0006355,GO:0006357,GO:0006725,GO:0006807,GO:0006950,GO:0006974,GO:0006996,GO:0008150,GO:0008152,GO:0009889,GO:0009890,GO:0009892,GO:0009987,GO:0010468,GO:…	Histone H2B|Histone H2B|Histone core|Histone H2B|Histone H2B|Histone-fold		ko:K11252	ko05034,ko05203,ko05322,map05034,map05203,map05322				ko00000,ko00001,ko03036,ko04147				NA
110671	-1.36573	0.0208015	Function Unknown			NA											NA
110839	-1.52961	0.0317629	Nucleotide transport and metabolism|Carbohydrate transport and metabolism	HIT domain		Histidine triad (HIT) protein|Histidine triad (HIT) protein|Histidine triad (HIT) protein|Histidine triad-like motif											NA
111183	-1.7351	0.0358666	Function Unknown	Arrestin (or S-antigen), C-terminal domain		Arrestin-like, N-terminal|Immunoglobulin E-set											NA
111291	-2.29422	0.0436473	Function Unknown	NA	NA	NA	NA	NA	NA	NA	NA	NA	NA	NA	NA	NA	NA
112238	-1.38819	0.0393874	Cytoskeleton	Dynein light chain type 1	GO:0000003,GO:0000226,GO:0000278,GO:0000280,GO:0000743,GO:0000746,GO:0000747,GO:0003006,GO:0003674,GO:0005488,GO:0005515,GO:0005575,GO:0005622,GO:0005623,GO:0005634,GO:0005737,GO:0005815,GO:0005816,GO:0005856,GO:0005868,GO:0005874,GO:0005875,GO:0005881,GO:0006810,GO:0006928,GO:0006996,GO:0006997,GO:0006999,GO:0007010,GO:0007017,GO:0007018,GO:0007049,GO:0007097,GO:0007127,GO:0008092,GO:0008150,GO:…	Dynein light chain, type 1 and 2|Dynein light chain, type 1 and 2|Dynein light chain, type 1 and 2|Dynein light chain, type 1 and 2		ko:K10418	ko04962,map04962				ko00000,ko00001,ko04812				NA
112500	-1.84782	0.00835972	Function Unknown			NA											NA
113144	-1.09986	0.0429089	Function Unknown			NA											0.927
113249	-1.5307	0.00797733	Posttranslational modification, protein turnover, chaperones	ATP binding		NA											NA
113326	-1.51812	0.0307442	Carbohydrate transport and metabolism	GDP-fucose protein O-fucosyltransferase		NA											NA
113332	-7.14567	0.00751473	Function Unknown			NA											NA
113429	-1.10573	0.0324973	Function Unknown	Protein kinase C conserved region 2 (CalB)	GO:0005575,GO:0005622,GO:0005623,GO:0005737,GO:0006810,GO:0006887,GO:0008150,GO:0009987,GO:0016192,GO:0032940,GO:0044424,GO:0044464,GO:0046903,GO:0051179,GO:0051234	C2 calcium-dependent membrane targeting|C2 calcium-dependent membrane targeting|C2 calcium-dependent membrane targeting|C2 calcium-dependent membrane targeting|Munc13 homology 1|Munc13 homology 2|C2 calcium/lipid-binding region, CaLB											NA
113464	-1.30285	0.00751473	Posttranslational modification, protein turnover, chaperones	Xylanase inhibitor N-terminal		Peptidase A1|Peptidase A1|Peptidase aspartic, active site|Peptidase aspartic, catalytic											1
113522	-3.49156	0.0245071	Function Unknown			NA											NA
113526	-1.43189	0.044886	Transcription	SANT SWI3, ADA2, N-CoR and TFIIIB'' DNA-binding domains		Myb, DNA-binding|SANT, DNA-binding|SANT, DNA-binding|Homeodomain-like											NA
113783	-1.34503	0.0240744	Function Unknown	nitrile biosynthetic process		Kelch repeat type 1|Kelch repeat type 2|GPCR, rhodopsin-like|Galactose oxidase/kelch, beta-propeller											0.976
114071	-1.41316	0.0212566	Function Unknown			NA											NA
114160	-1.15027	0.0481321	Function Unknown	Protein kinase C conserved region 2 (CalB)		C2 calcium-dependent membrane targeting|C2 calcium-dependent membrane targeting|C2 calcium-dependent membrane targeting|C2 calcium-dependent membrane targeting|C2 calcium/lipid-binding region, CaLB											NA
114486	-1.84699	0.0329334	Function Unknown			NA											NA
114681	-1.09138	0.0277986	Signal transduction mechanisms	rhomboid-like protein		Peptidase S54, rhomboid	2.3.1.225	ko:K20028					ko00000,ko01000,ko04131				NA
115371	-1.78211	0.0285949	Function Unknown			NA											NA
115579	-3.66144	0.0123369	Function Unknown			NA											NA
117763	-1.56455	0.027655	Function Unknown	Domain in Tre-2, BUB2p, and Cdc16p. Probable Rab-GAPs.	GO:0000131,GO:0003674,GO:0005096,GO:0005488,GO:0005515,GO:0005575,GO:0005622,GO:0005623,GO:0005737,GO:0005798,GO:0005829,GO:0005886,GO:0005933,GO:0005934,GO:0005935,GO:0006810,GO:0006886,GO:0006888,GO:0008047,GO:0008104,GO:0008150,GO:0012505,GO:0015031,GO:0015833,GO:0016020,GO:0016192,GO:0017016,GO:0017137,GO:0019899,GO:0023052,GO:0030234,GO:0030427,GO:0030695,GO:0031267,GO:0031338,GO:0031410,GO:…	RabGAP/TBC|RabGAP/TBC|RabGAP/TBC|RabGAP/TBC											NA
117834	-1.16616	0.0498226	Intracellular trafficking, secretion, and vesicular transport	Mortierella verticillata NRRL 6337	GO:0000041,GO:0003674,GO:0005215,GO:0005575,GO:0005623,GO:0005886,GO:0005887,GO:0006810,GO:0006811,GO:0006812,GO:0006820,GO:0006826,GO:0006873,GO:0006875,GO:0006879,GO:0006950,GO:0007154,GO:0008150,GO:0008509,GO:0008514,GO:0009267,GO:0009605,GO:0009987,GO:0009991,GO:0010106,GO:0015075,GO:0015318,GO:0015343,GO:0015688,GO:0015711,GO:0015850,GO:0015891,GO:0016020,GO:0016021,GO:0019725,GO:0022857,GO:…	Major facilitator superfamily MFS-1|Major facilitator superfamily|MFS general substrate transporter											0.038
118577	-1.29055	0.0484844	Signal transduction mechanisms	Protein tyrosine kinase	GO:0000082,GO:0000122,GO:0000166,GO:0000278,GO:0003674,GO:0003824,GO:0004672,GO:0004674,GO:0005488,GO:0005524,GO:0005575,GO:0005622,GO:0005623,GO:0005634,GO:0005737,GO:0006355,GO:0006357,GO:0006464,GO:0006468,GO:0006793,GO:0006796,GO:0006807,GO:0007049,GO:0007124,GO:0007154,GO:0007165,GO:0008144,GO:0008150,GO:0008152,GO:0009743,GO:0009746,GO:0009749,GO:0009889,GO:0009890,GO:0009891,GO:0009892,GO:…	Protein kinase, core|Serine/threonine protein kinase-related|Tyrosine protein kinase|Serine/threonine protein kinase|Protein kinase, core|Serine/threonine protein kinase, active site|Protein kinase-like											NA
119795	-1.04506	0.0270197	Lipid transport and metabolism	Acid phosphatase homologues		Phosphatidic acid phosphatase type 2/haloperoxidase|Phosphatidic acid phosphatase type 2/haloperoxidase|Phosphatidic acid phosphatase type 2/haloperoxidase											NA
119998	-1.55651	0.020494	Cytoskeleton	Microtubule binding		Kinesin, motor region|Kinesin, motor region|Kinesin, motor region|Kinesin, motor region|Kinesin, motor region											NA
121377	-1.7501	0.0362241	Carbohydrate transport and metabolism	MAP kinase kinase kinase kinase activity	GO:0001932,GO:0001934,GO:0003674,GO:0003824,GO:0004672,GO:0004674,GO:0005488,GO:0005515,GO:0005575,GO:0005622,GO:0005623,GO:0005634,GO:0005737,GO:0006464,GO:0006468,GO:0006793,GO:0006796,GO:0006807,GO:0006928,GO:0006950,GO:0006996,GO:0007010,GO:0007154,GO:0007165,GO:0007264,GO:0007265,GO:0007266,GO:0007346,GO:0008150,GO:0008152,GO:0008219,GO:0008283,GO:0009893,GO:0009966,GO:0009987,GO:0010562,GO:…	Protein kinase, core|Serine/threonine protein kinase-related|Tyrosine protein kinase|Serine/threonine protein kinase|Protein kinase, core|Serine/threonine protein kinase, active site|Protein kinase-like	2.7.11.1	ko:K04406,ko:K08838	ko04010,map04010				ko00000,ko00001,ko01000,ko01001,ko04131				NA
122047	-1.69585	0.0353655	Function Unknown	protein-cysteine S-palmitoyltransferase activity		Zinc finger, DHHC-type|Zinc finger, DHHC-type|Zinc finger, DHHC-type|Fungal transcriptional regulatory protein, N-terminal											NA
125019	-3.45873	0.0330446	Translation, ribosomal structure and biogenesis	RNA binding	GO:0000375,GO:0000377,GO:0000398,GO:0003674,GO:0003676,GO:0005488,GO:0005575,GO:0005622,GO:0005623,GO:0005634,GO:0006139,GO:0006396,GO:0006397,GO:0006725,GO:0006807,GO:0008150,GO:0008152,GO:0008380,GO:0009987,GO:0010467,GO:0016070,GO:0016071,GO:0034641,GO:0043170,GO:0043226,GO:0043227,GO:0043229,GO:0043231,GO:0044237,GO:0044238,GO:0044424,GO:0044464,GO:0046483,GO:0071704,GO:0090304,GO:0097159,GO:…	RNA recognition motif, RNP-1|RNA recognition motif, RNP-1|RNA recognition motif, RNP-1											NA
126217	-1.46084	0.0344433	RNA processing and modification	positive regulation of lens fiber cell differentiation		Homeobox|Homeobox|Homeobox|Homeobox|Homeobox|Homeobox|Homeodomain-like		ko:K08031	ko04550,ko04950,map04550,map04950				ko00000,ko00001,ko03000				NA
127738	-1.49126	0.0440971	Signal transduction mechanisms	Translation initiation factor IF-2, N-terminal region	GO:0000003,GO:0000935,GO:0003006,GO:0003674,GO:0003824,GO:0005488,GO:0005543,GO:0005575,GO:0005622,GO:0005623,GO:0005634,GO:0005886,GO:0006629,GO:0006644,GO:0006650,GO:0006793,GO:0006796,GO:0007049,GO:0008150,GO:0008152,GO:0008289,GO:0009653,GO:0009987,GO:0010927,GO:0016020,GO:0016043,GO:0016301,GO:0016307,GO:0016308,GO:0016310,GO:0016740,GO:0016772,GO:0016773,GO:0019637,GO:0019953,GO:0022402,GO:…	Phosphatidylinositol-4-phosphate 5-kinase, core|Phosphatidylinositol-4-phosphate 5-kinase, core, subgroup	2.7.1.68	ko:K00889	ko00562,ko01100,ko04011,ko04070,ko04072,ko04139,ko04144,ko04666,ko04810,ko05231,map00562,map01100,map04011,map04070,map04072,map04139,map04144,map04666,map04810,map05231	M00130	R03469	RC00002,RC00078	ko00000,ko00001,ko00002,ko01000,ko04131				NA
127973	-1.23336	0.0350561	Carbohydrate transport and metabolism	Alg9-like mannosyltransferase family	GO:0000030,GO:0003674,GO:0003824,GO:0004584,GO:0005488,GO:0005575,GO:0005622,GO:0005623,GO:0005737,GO:0005783,GO:0005789,GO:0006464,GO:0006497,GO:0006505,GO:0006506,GO:0006629,GO:0006643,GO:0006644,GO:0006650,GO:0006661,GO:0006664,GO:0006793,GO:0006796,GO:0006807,GO:0008150,GO:0008152,GO:0008610,GO:0008654,GO:0009058,GO:0009059,GO:0009247,GO:0009987,GO:0012505,GO:0016020,GO:0016021,GO:0016740,GO:…	Alg9-like mannosyltransferase		ko:K05286	ko00563,ko01100,map00563,map01100	M00065	R05922		ko00000,ko00001,ko00002,ko01000,ko01003		GT22		0.602
128663	-1.74299	0.0229526	Inorganic ion transport and metabolism	Sugar (and other) transporter	GO:0003674,GO:0005215,GO:0005315,GO:0005575,GO:0005623,GO:0005886,GO:0005887,GO:0006810,GO:0006811,GO:0006817,GO:0006820,GO:0008150,GO:0015291,GO:0015318,GO:0015698,GO:0016020,GO:0016021,GO:0022804,GO:0022857,GO:0031224,GO:0031226,GO:0034220,GO:0035435,GO:0044425,GO:0044459,GO:0044464,GO:0051179,GO:0051234,GO:0055085,GO:0071944,GO:0098656,GO:0098660,GO:0098661	General substrate transporter|Major facilitator superfamily|Sugar transporter, conserved site|Sugar transporter, conserved site|MFS general substrate transporter		ko:K08176					ko00000,ko02000	2.A.1.9			NA
129037	-1.57863	0.0116944	Energy production and conversion	PhoX homologous domain, present in p47phox and p40phox.	GO:0000003,GO:0000131,GO:0000746,GO:0000747,GO:0000753,GO:0000767,GO:0000902,GO:0003006,GO:0003674,GO:0005198,GO:0005488,GO:0005515,GO:0005543,GO:0005575,GO:0005622,GO:0005623,GO:0005737,GO:0005739,GO:0005933,GO:0005934,GO:0005935,GO:0005937,GO:0005938,GO:0007154,GO:0007163,GO:0007165,GO:0007264,GO:0007265,GO:0007266,GO:0008150,GO:0008289,GO:0008360,GO:0009653,GO:0009987,GO:0016043,GO:0019953,GO:…	Src homology-3|Src homology-3|Src homology-3|Octicosapeptide/Phox/Bem1p|Phox-like|Phox-like|Src homology-3|Src homology-3|Phox-like|Src homology-3|Phox-like		ko:K11237	ko04011,map04011				ko00000,ko00001				NA
130327	-1.46234	0.0327781	Signal transduction mechanisms	Kinase-like		Protein kinase, core|Serine/threonine protein kinase-related|Tyrosine protein kinase|Serine/threonine protein kinase|Protein kinase, core|Protein kinase ATP binding, conserved site|Serine/threonine protein kinase, active site|Protein kinase-like	2.7.11.1	ko:K08793					ko00000,ko01000,ko01001				NA
133632	-1.83848	0.039702	Signal transduction mechanisms	Kinase-like	GO:0000075,GO:0000166,GO:0000278,GO:0001100,GO:0003674,GO:0003824,GO:0004672,GO:0004674,GO:0005488,GO:0005524,GO:0005575,GO:0005622,GO:0005623,GO:0005634,GO:0005737,GO:0005815,GO:0005816,GO:0005856,GO:0005933,GO:0005935,GO:0005938,GO:0006464,GO:0006468,GO:0006793,GO:0006796,GO:0006807,GO:0007049,GO:0007088,GO:0007093,GO:0007096,GO:0007154,GO:0007165,GO:0007346,GO:0008104,GO:0008144,GO:0008150,GO:…	Kinase-associated KA1		ko:K08286					ko00000,ko01000				NA
134254	-2.9179	0.0445107	Function Unknown	zinc finger		Zinc finger, C2H2-type|Zinc finger, C2H2-type|Zinc finger, C2H2-like|Zinc finger, C2H2-type|Zinc finger, C2H2-type											NA
134259	-1.15208	0.0463872	Function Unknown	Zinc finger, C2H2 type	GO:0000976,GO:0000977,GO:0000978,GO:0000981,GO:0000982,GO:0000987,GO:0001012,GO:0001067,GO:0001077,GO:0001228,GO:0003674,GO:0003676,GO:0003677,GO:0003690,GO:0003700,GO:0005488,GO:0005515,GO:0005575,GO:0005622,GO:0005623,GO:0005634,GO:0005737,GO:0005829,GO:0006139,GO:0006351,GO:0006355,GO:0006357,GO:0006366,GO:0006725,GO:0006807,GO:0006873,GO:0006874,GO:0006875,GO:0007154,GO:0007165,GO:0008150,GO:…	Zinc finger, C2H2-type|Zinc finger, C2H2-type|Zinc finger, C2H2-like|Zinc finger, C2H2-type|Zinc finger, C2H2-type		ko:K21543					ko00000,ko03000				NA
134587	-1.82567	0.0258298	Signal transduction mechanisms	Kinase-like	GO:0000075,GO:0000166,GO:0000278,GO:0001100,GO:0003674,GO:0003824,GO:0004672,GO:0004674,GO:0005488,GO:0005524,GO:0005575,GO:0005622,GO:0005623,GO:0005634,GO:0005737,GO:0005815,GO:0005816,GO:0005856,GO:0005933,GO:0005935,GO:0005938,GO:0006464,GO:0006468,GO:0006793,GO:0006796,GO:0006807,GO:0007049,GO:0007088,GO:0007093,GO:0007096,GO:0007154,GO:0007165,GO:0007346,GO:0008104,GO:0008144,GO:0008150,GO:…	Protein kinase, core|Serine/threonine protein kinase-related|Tyrosine protein kinase|Serine/threonine protein kinase|Protein kinase, core|Protein kinase ATP binding, conserved site|Serine/threonine protein kinase, active site|Protein kinase-like		ko:K08286					ko00000,ko01000				NA
134676	-2.72191	0.028614	Intracellular trafficking, secretion, and vesicular transport	Magnesium transporter NIPA		Protein of unknown function DUF803											0.106
137093	-1.02752	0.0415493	Function Unknown	NA	NA	Sel1-like|Sel1-like	NA	NA	NA	NA	NA	NA	NA	NA	NA	NA	NA
138350	-1.09191	0.0108896	Intracellular trafficking, secretion, and vesicular transport	TB2/DP1, HVA22 family	GO:0003674,GO:0005488,GO:0005515,GO:0005575,GO:0005622,GO:0005623,GO:0005634,GO:0005635,GO:0005737,GO:0005783,GO:0005789,GO:0005933,GO:0005934,GO:0005938,GO:0006810,GO:0006950,GO:0006996,GO:0006997,GO:0006999,GO:0007029,GO:0007031,GO:0008150,GO:0009987,GO:0010256,GO:0012505,GO:0016020,GO:0016021,GO:0016043,GO:0016192,GO:0022607,GO:0030176,GO:0030427,GO:0031224,GO:0031227,GO:0031967,GO:0031975,GO:…	TB2/DP1 and HVA22 related protein		ko:K17279					ko00000,ko04147				NA
138478	-2.34655	0.0110881	Function Unknown	BTB/POZ domain	GO:0000003,GO:0000746,GO:0000747,GO:0003006,GO:0005575,GO:0005622,GO:0005623,GO:0005737,GO:0007049,GO:0007154,GO:0007165,GO:0007264,GO:0007265,GO:0007266,GO:0008150,GO:0009653,GO:0009987,GO:0010570,GO:0010810,GO:0010811,GO:0019953,GO:0022402,GO:0022413,GO:0022414,GO:0023052,GO:0030154,GO:0030155,GO:0030435,GO:0030437,GO:0031136,GO:0031137,GO:0031139,GO:0032005,GO:0032488,GO:0032502,GO:0032505,GO:…	Kelch repeat type 1|Kelch repeat type 2|Galactose oxidase/kelch, beta-propeller											NA
138891	-1.91206	0.0186824	Carbohydrate transport and metabolism	Glycosyltransferase family 17		Glycosyl transferase, family 17	2.4.1.144	ko:K00737	ko00510,ko01100,map00510,map01100	M00075	R05986		ko00000,ko00001,ko00002,ko01000,ko01003		GT17		NA
139628	-1.1265	0.0100202	Secondary metabolites biosynthesis, transport and catabolism	Mortierella verticillata NRRL 6337		Alcohol dehydrogenase, zinc-binding|Alcohol dehydrogenase GroES-like|Alcohol dehydrogenase, zinc-containing, conserved site|GroES-like|NAD(P)-binding											NA
141604	-2.53409	0.0277775	Cell wall/membrane/envelope biogenesis|Posttranslational modification, protein turnover, chaperones|Signal transduction mechanisms	Sel1-like repeats.		Sel1-like|Sel1-like											NA
141643	-1.16669	0.0317583	Posttranslational modification, protein turnover, chaperones|Signal transduction mechanisms	Dolichol-phosphate mannosyltransferase subunit 3 (DPM3)		Dolichol-phosphate mannosyltransferase subunit 3		ko:K09659	ko00510,ko01100,map00510,map01100		R01009	RC00005	ko00000,ko00001		GT2		NA
141963	-1.14159	0.0386246	Signal transduction mechanisms	Kinase-like	GO:0000075,GO:0000166,GO:0000278,GO:0001100,GO:0003674,GO:0003824,GO:0004672,GO:0004674,GO:0005488,GO:0005524,GO:0005575,GO:0005622,GO:0005623,GO:0005634,GO:0005737,GO:0005815,GO:0005816,GO:0005856,GO:0005933,GO:0005935,GO:0005938,GO:0006464,GO:0006468,GO:0006793,GO:0006796,GO:0006807,GO:0007049,GO:0007088,GO:0007093,GO:0007096,GO:0007154,GO:0007165,GO:0007346,GO:0008104,GO:0008144,GO:0008150,GO:…	Protein kinase, core|Serine/threonine protein kinase-related|Tyrosine protein kinase|Serine/threonine protein kinase|Protein kinase, core|Serine/threonine protein kinase, active site|Protein kinase-like		ko:K08286					ko00000,ko01000				NA
142178	-1.31744	0.00698271	Posttranslational modification, protein turnover, chaperones	Aminotransferase class I and II	GO:0002178,GO:0003674,GO:0003824,GO:0004758,GO:0005575,GO:0005622,GO:0005623,GO:0005737,GO:0005783,GO:0005789,GO:0006629,GO:0006643,GO:0006665,GO:0006807,GO:0008150,GO:0008152,GO:0008610,GO:0009058,GO:0009987,GO:0012505,GO:0016020,GO:0016408,GO:0016409,GO:0016454,GO:0016740,GO:0016746,GO:0016747,GO:0017059,GO:0030148,GO:0031211,GO:0031984,GO:0032991,GO:0035339,GO:0042175,GO:0043226,GO:0043227,GO:…	Aminotransferase, class I and II|Aminotransferase, class-II, pyridoxal-phosphate binding site|Pyridoxal phosphate-dependent transferase, major region	2.3.1.50	ko:K00654	ko00600,ko01100,ko04071,ko04138,map00600,map01100,map04071,map04138	M00094,M00099	R01281	RC00004,RC02725,RC02849	ko00000,ko00001,ko00002,ko01000,ko01007			iMM904.YDR062W,iND750.YDR062W	NA
143643	-1.09155	0.0482371	Cell wall/membrane/envelope biogenesis	Chitin synthase		Fungal chitin synthase											NA
144994	-2.08313	0.0455893	Function Unknown	SCP / Tpx-1 / Ag5 / PR-1 / Sc7 family of extracellular domains.		Allergen V5/Tpx-1 related|Allergen V5/Tpx-1 related|SCP-like extracellular|Allergen V5/Tpx-1 related|TonB box, conserved site|Allergen V5/Tpx-1 related|Allergen V5/Tpx-1 related|SCP-like extracellular											0.998
146097	-1.07742	0.0330446	Intracellular trafficking, secretion, and vesicular transport	GTP-binding Protein		Ras GTPase|Ras|Ras small GTPase, Ras type|Ras small GTPase, Rho type|Ras small GTPase, Rab type|Ran GTPase|Small GTP-binding protein											NA
146320	-1.19327	0.0217234	Function Unknown	SNARE associated Golgi protein		SNARE associated Golgi protein											0.998
147439	-1.18471	0.0229526	Function Unknown	GTP binding		Ras GTPase|Ras|Ras small GTPase, Ras type|Ras small GTPase, Rho type|Ras small GTPase, Rab type|Small GTP-binding protein											NA
147543	-2.40449	0.0331116	Signal transduction mechanisms	Protein kinase C conserved region 1 (C1) domains (Cysteine-rich domains)	GO:0000003,GO:0000399,GO:0000749,GO:0000750,GO:0001403,GO:0003674,GO:0005096,GO:0005575,GO:0005622,GO:0005623,GO:0005737,GO:0005856,GO:0005933,GO:0005935,GO:0005938,GO:0006996,GO:0007010,GO:0007015,GO:0007114,GO:0007117,GO:0007118,GO:0007119,GO:0007124,GO:0007154,GO:0007163,GO:0007165,GO:0007186,GO:0007264,GO:0008047,GO:0008104,GO:0008150,GO:0008360,GO:0008361,GO:0009987,GO:0010033,GO:0016043,GO:…	RhoGAP|RhoGAP|RhoGAP|Rho GTPase activation protein		ko:K16733,ko:K19839	ko04011,map04011				ko00000,ko00001,ko03036,ko04131				NA
148187	-1.52051	0.0211127	Function Unknown	Lytic transglycolase		Rare lipoprotein A|Barwin-related endoglucanase											NA
148649	-1.0494	0.044886	Signal transduction mechanisms	GTPase-activator protein for Rho-like GTPases	GO:0000003,GO:0000131,GO:0000278,GO:0000281,GO:0000746,GO:0000747,GO:0000755,GO:0000910,GO:0000917,GO:0003674,GO:0005096,GO:0005575,GO:0005622,GO:0005623,GO:0005737,GO:0005739,GO:0005933,GO:0005934,GO:0005935,GO:0005937,GO:0006109,GO:0006996,GO:0007010,GO:0007049,GO:0008047,GO:0008150,GO:0008360,GO:0009272,GO:0009889,GO:0009966,GO:0009968,GO:0009987,GO:0010556,GO:0010646,GO:0010648,GO:0010675,GO:…	Zinc finger, LIM-type|Zinc finger, LIM-type|RhoGAP|Zinc finger, LIM-type|RhoGAP|Zinc finger, LIM-type|RhoGAP|Zinc finger, LIM-type|Rho GTPase activation protein											NA
150480	-1.44166	0.0128859	Carbohydrate transport and metabolism	Transporter		Major facilitator superfamily MFS-1|Major facilitator superfamily|MFS general substrate transporter											NA
150506	-1.95068	0.0393672	Translation, ribosomal structure and biogenesis|Signal transduction mechanisms	RNA-binding protein involved in post-transcriptional regulation through transcript degradation. May be involved in vacuolar protein transport (By similarity)	GO:0000288,GO:0000289,GO:0000932,GO:0000956,GO:0003674,GO:0003676,GO:0003677,GO:0003723,GO:0003729,GO:0005488,GO:0005575,GO:0005622,GO:0005623,GO:0005634,GO:0005737,GO:0005829,GO:0006139,GO:0006401,GO:0006402,GO:0006417,GO:0006725,GO:0006807,GO:0008150,GO:0008152,GO:0009056,GO:0009057,GO:0009889,GO:0009890,GO:0009892,GO:0009893,GO:0009894,GO:0009987,GO:0010468,GO:0010556,GO:0010558,GO:0010604,GO:…	NA											NA
151082	-1.33462	0.0270197	Function Unknown	Rab5-interacting protein (Rab5ip)	GO:0000045,GO:0005575,GO:0005622,GO:0005623,GO:0005737,GO:0005783,GO:0005789,GO:0006457,GO:0006914,GO:0006996,GO:0007033,GO:0008150,GO:0008152,GO:0009056,GO:0009987,GO:0012505,GO:0016020,GO:0016021,GO:0016043,GO:0016236,GO:0022406,GO:0022607,GO:0030176,GO:0031224,GO:0031227,GO:0031984,GO:0032991,GO:0034975,GO:0042175,GO:0043226,GO:0043227,GO:0043229,GO:0043231,GO:0044085,GO:0044237,GO:0044248,GO:…	Protein of unknown function DUF786											NA
151287	-1.2926	0.0468656	Energy production and conversion	Aldehyde dehydrogenase family		Aldehyde dehydrogenase|Aldehyde dehydrogenase NAD(P)-dependent|Aldehyde dehydrogenase, conserved site|Aldehyde dehydrogenase, conserved site|Aldehyde/histidinol dehydrogenase	1.2.1.3,1.2.1.5,1.2.1.82	ko:K00128,ko:K00129,ko:K17819	ko00010,ko00053,ko00071,ko00280,ko00310,ko00330,ko00340,ko00350,ko00360,ko00380,ko00410,ko00561,ko00620,ko00625,ko00903,ko00906,ko00980,ko00981,ko00982,ko01100,ko01110,ko01120,ko01130,ko05204,map00010,map00053,map00071,map00280,map00310,map00330,map00340,map00350,map00360,map00380,map00410,map00561,map00620,map00625,map00903,map00906,map00980,map00981,map00982,map01100,map01110,map01120,map01130,…	M00135	R00264,R00631,R00710,R00711,R00904,R01752,R01986,R02536,R02537,R02549,R02678,R02695,R02697,R02940,R02957,R03283,R03300,R03302,R03869,R04065,R04506,R04882,R04883,R04888,R04889,R04891,R04892,R04903,R04996,R05050,R05237,R05238,R05286,R06366,R07104,R08146,R08282,R08283,R08307,R09783	RC00047,RC00071,RC00080,RC00186,RC00218,RC00242,RC00254,RC00816,RC01500,RC01735	ko00000,ko00001,ko00002,ko01000				NA
151364	-1.44547	0.0326924	Function Unknown	Anp1	GO:0000030,GO:0000032,GO:0000136,GO:0000137,GO:0000139,GO:0003674,GO:0003824,GO:0005575,GO:0005622,GO:0005623,GO:0005737,GO:0005794,GO:0005795,GO:0006056,GO:0006057,GO:0006464,GO:0006486,GO:0006487,GO:0006807,GO:0008150,GO:0008152,GO:0009058,GO:0009059,GO:0009100,GO:0009101,GO:0009987,GO:0012505,GO:0016020,GO:0016021,GO:0016740,GO:0016757,GO:0016758,GO:0019538,GO:0030173,GO:0031090,GO:0031224,GO:…	Anp1		ko:K05533	ko00513,ko01100,map00513,map01100	M00074			ko00000,ko00001,ko00002,ko01000		GT62		NA
152885	-1.22074	0.0403215	Cell cycle control, cell division, chromosome partitioning|Posttranslational modification, protein turnover, chaperones	Caspase domain	GO:0003674,GO:0003824,GO:0004175,GO:0004197,GO:0004198,GO:0005575,GO:0005622,GO:0005623,GO:0005634,GO:0005737,GO:0005829,GO:0006508,GO:0006515,GO:0006807,GO:0006915,GO:0008150,GO:0008152,GO:0008219,GO:0008233,GO:0008234,GO:0009056,GO:0009057,GO:0009987,GO:0012501,GO:0016787,GO:0019538,GO:0030163,GO:0043170,GO:0043226,GO:0043227,GO:0043229,GO:0043231,GO:0044237,GO:0044238,GO:0044248,GO:0044257,GO:…	Peptidase C14, caspase catalytic											NA
153241	-1.04645	0.0499273	Cell wall/membrane/envelope biogenesis|Cell motility	Myosin. Large ATPases.	GO:0005575,GO:0005622,GO:0005623,GO:0005737,GO:0005886,GO:0012506,GO:0016020,GO:0030659,GO:0031090,GO:0031410,GO:0031982,GO:0043226,GO:0043227,GO:0043229,GO:0044422,GO:0044424,GO:0044433,GO:0044444,GO:0044446,GO:0044464,GO:0071944,GO:0097708	Myosin head, motor region|Myosin head, motor region|Cytochrome b5|Fungal chitin synthase|DEK C terminal|Myosin head, motor region|Cytochrome b5|RNA polymerase sigma factor 54, interaction|Cytochrome b5	2.4.1.16	ko:K00698	ko00520,map00520		R02335	RC00005	ko00000,ko00001,ko01000,ko01003		GT2		NA
153280	-2.73434	0.0355778	Energy production and conversion	NADH:flavin oxidoreductase / NADH oxidase family		NADH:flavin oxidoreductase/NADH oxidase, N-terminal	1.6.99.1	ko:K00354			R00282	RC00001	ko00000,ko01000				NA
153842	-1.04533	0.0404415	Inorganic ion transport and metabolism	Mortierella verticillata NRRL 6337	GO:0000041,GO:0003674,GO:0005215,GO:0005381,GO:0005575,GO:0005623,GO:0005886,GO:0005887,GO:0006810,GO:0006811,GO:0006812,GO:0006820,GO:0006826,GO:0006873,GO:0006875,GO:0006879,GO:0006950,GO:0007154,GO:0008150,GO:0008324,GO:0009267,GO:0009605,GO:0009987,GO:0009991,GO:0010106,GO:0015075,GO:0015093,GO:0015318,GO:0015684,GO:0016020,GO:0016021,GO:0019725,GO:0022857,GO:0022890,GO:0030001,GO:0030003,GO:…	Iron permease FTR1|MFS general substrate transporter		ko:K07243					ko00000,ko02000	2.A.108.1,2.A.108.2			NA
154244	-1.33903	0.0449882	Signal transduction mechanisms	Secreted protein acidic and rich in cysteine Ca binding region	GO:0000003,GO:0000212,GO:0000226,GO:0000278,GO:0000280,GO:0000935,GO:0003006,GO:0003674,GO:0005488,GO:0005509,GO:0005575,GO:0005622,GO:0005623,GO:0005737,GO:0005815,GO:0005816,GO:0005823,GO:0005856,GO:0005937,GO:0006996,GO:0007010,GO:0007017,GO:0007049,GO:0007051,GO:0007052,GO:0008104,GO:0008150,GO:0009653,GO:0009987,GO:0010927,GO:0015629,GO:0015630,GO:0016043,GO:0016459,GO:0016461,GO:0019953,GO:…	Calcium-binding EF-hand|Calcium-binding EF-hand|Calcium-binding EF-hand|Calcium-binding EF-hand|Calcium-binding EF-hand		ko:K02183	ko04014,ko04015,ko04016,ko04020,ko04022,ko04024,ko04070,ko04114,ko04218,ko04261,ko04270,ko04371,ko04626,ko04713,ko04720,ko04722,ko04728,ko04740,ko04744,ko04745,ko04750,ko04910,ko04912,ko04915,ko04916,ko04921,ko04922,ko04924,ko04925,ko04970,ko04971,ko05010,ko05031,ko05034,ko05133,ko05152,ko05167,ko05200,ko05214,ko05418,map04014,map04015,map04016,map04020,map04022,map04024,map04070,map04114,map0421…				ko00000,ko00001,ko01009,ko03036,ko04131,ko04147				NA
154599	-1.33927	0.0270197	Cytoskeleton	Gelsolin homology domain		Gelsolin|Gelsolin region|Gelsolin		ko:K05768	ko04666,ko04810,ko05203,map04666,map04810,map05203				ko00000,ko00001,ko04147,ko04812				NA
154647	-1.54603	0.0330446	Intracellular trafficking, secretion, and vesicular transport	Major Facilitator Superfamily		Major facilitator superfamily MFS-1|MFS general substrate transporter											NA
154666	-1.7234	0.0186824	Translation, ribosomal structure and biogenesis	Zn-dependent hydrolase oxidoreductase family protein	GO:0003674,GO:0003824,GO:0004620,GO:0005575,GO:0005622,GO:0005623,GO:0005737,GO:0005739,GO:0005740,GO:0005743,GO:0006066,GO:0006576,GO:0006629,GO:0006644,GO:0006650,GO:0006793,GO:0006796,GO:0006807,GO:0008081,GO:0008150,GO:0008152,GO:0009308,GO:0009987,GO:0016020,GO:0016021,GO:0016298,GO:0016787,GO:0016788,GO:0019637,GO:0019866,GO:0031090,GO:0031224,GO:0031300,GO:0031301,GO:0031304,GO:0031305,GO:…	NA	3.1.4.54	ko:K13985	ko04723,map04723				ko00000,ko00001,ko01000				NA
154668	-1.37073	0.00790959	Amino acid transport and metabolism	Aminotransferase class I and II	GO:0003674,GO:0003824,GO:0005575,GO:0005622,GO:0005623,GO:0005737,GO:0005739,GO:0006082,GO:0006520,GO:0006725,GO:0006807,GO:0008150,GO:0008152,GO:0008483,GO:0009058,GO:0009987,GO:0016053,GO:0016212,GO:0016740,GO:0016769,GO:0017144,GO:0018130,GO:0019438,GO:0019752,GO:0032787,GO:0034275,GO:0034276,GO:0036137,GO:0042180,GO:0042537,GO:0043226,GO:0043227,GO:0043229,GO:0043231,GO:0043436,GO:0044237,GO:…	Aminotransferase, class I and II|Pyridoxal phosphate-dependent transferase, major region	2.6.1.7	ko:K14264	ko00380,ko01100,map00380,map01100		R01956,R04171	RC00006	ko00000,ko00001,ko01000,ko01007			iMM904.YJL060W	NA
154681	-1.71652	0.0196438	Function Unknown	NA	NA	NA	NA	NA	NA	NA	NA	NA	NA	NA	NA	NA	NA
154699	-3.45512	0.0383309	Function Unknown			NA											NA
154709	-1.68875	0.038908	Function Unknown	NA	NA	NA	NA	NA	NA	NA	NA	NA	NA	NA	NA	NA	NA
154711	-2.03877	0.0399376	Function Unknown	Mortierella verticillata NRRL 6337		Rare lipoprotein A|Barwin-related endoglucanase											0.997
154720	-1.09952	0.0147484	Function Unknown	Beta-flanking protein		NA											NA
154807	-1.25573	0.00790959	Intracellular trafficking, secretion, and vesicular transport	BAR adaptor protein	GO:0000003,GO:0000278,GO:0000281,GO:0000746,GO:0000747,GO:0000910,GO:0000912,GO:0000915,GO:0003674,GO:0005085,GO:0005088,GO:0005089,GO:0005488,GO:0005515,GO:0005575,GO:0005622,GO:0005623,GO:0005737,GO:0005829,GO:0005856,GO:0005937,GO:0005938,GO:0006810,GO:0006897,GO:0006950,GO:0006970,GO:0006996,GO:0007009,GO:0007010,GO:0007015,GO:0007049,GO:0007154,GO:0007165,GO:0007264,GO:0008092,GO:0008150,GO:…	BAR|BAR|BAR		ko:K20120					ko00000,ko04131				NA
154808	-1.49488	0.00751473	Chromatin structure and dynamics	Mortierella verticillata NRRL 6337 histone H3 (137 aa)	GO:0000003,GO:0000075,GO:0000228,GO:0000278,GO:0000775,GO:0000785,GO:0000786,GO:0000788,GO:0000790,GO:0000792,GO:0001672,GO:0003006,GO:0003674,GO:0003676,GO:0003677,GO:0003682,GO:0005488,GO:0005575,GO:0005622,GO:0005623,GO:0005634,GO:0005657,GO:0005694,GO:0005720,GO:0005721,GO:0006139,GO:0006259,GO:0006281,GO:0006289,GO:0006323,GO:0006325,GO:0006333,GO:0006334,GO:0006351,GO:0006725,GO:0006807,GO:…	Histone H3|Histone core|Histone H3|Histone H3|Histone H3|Histone-fold		ko:K11253	ko05034,ko05202,ko05322,map05034,map05202,map05322				ko00000,ko00001,ko03036,ko04147				NA
154810	-1.17055	0.00797733	Chromatin structure and dynamics	Histone 2A	GO:0000070,GO:0000122,GO:0000228,GO:0000278,GO:0000280,GO:0000775,GO:0000781,GO:0000784,GO:0000785,GO:0000786,GO:0000788,GO:0000790,GO:0000792,GO:0000819,GO:0003674,GO:0003676,GO:0003677,GO:0005488,GO:0005575,GO:0005622,GO:0005623,GO:0005634,GO:0005657,GO:0005694,GO:0005720,GO:0005721,GO:0005724,GO:0006139,GO:0006259,GO:0006281,GO:0006282,GO:0006323,GO:0006325,GO:0006333,GO:0006342,GO:0006355,GO:…	Histone H2A|Histone H2A|Histone core|Histone H2A|Histone H2A|Histone-fold		ko:K11251	ko04217,ko05034,ko05322,map04217,map05034,map05322				ko00000,ko00001,ko03036,ko04147				NA
154812	-1.22533	0.0128859	Chromatin structure and dynamics	Histone H2B	GO:0000122,GO:0000228,GO:0000785,GO:0000786,GO:0000788,GO:0000790,GO:0003674,GO:0003676,GO:0003677,GO:0005488,GO:0005575,GO:0005622,GO:0005623,GO:0005634,GO:0005657,GO:0005694,GO:0006139,GO:0006259,GO:0006281,GO:0006301,GO:0006325,GO:0006333,GO:0006355,GO:0006357,GO:0006725,GO:0006807,GO:0006950,GO:0006974,GO:0006996,GO:0008150,GO:0008152,GO:0009889,GO:0009890,GO:0009892,GO:0009987,GO:0010468,GO:…	Histone H2B|Histone H2B|Histone core|Histone H2B|Histone H2B|Histone-fold		ko:K11252	ko05034,ko05203,ko05322,map05034,map05203,map05322				ko00000,ko00001,ko03036,ko04147				NA
154867	-1.5871	0.0340353	Cytoskeleton	Dynamitin		Dynamitin		ko:K18599					ko00000,ko04812				NA
154885	-1.29512	0.0209868	Energy production and conversion|Coenzyme transport and metabolism	FAD binding domain		Aromatic-ring hydroxylase|Monooxygenase, FAD-binding											NA
154886	-1.31694	0.00804152	Energy production and conversion|Coenzyme transport and metabolism	FAD binding domain		Intermediate filament protein|Thioredoxin-like fold											NA
155087	-3.18466	0.0348948	Carbohydrate transport and metabolism	Specific in hydrolyzing the terminal glycosidic bond of polygalacturonic acid and oligogalacturonates		Glycoside hydrolase, family 28|Parallel beta-helix repeat|Pectin lyase fold/virulence factor	3.2.1.67	ko:K01213	ko00040,ko01100,map00040,map01100	M00081	R01982,R07413	RC00049	ko00000,ko00001,ko00002,ko01000				1
155148	-2.49489	0.0101346	Function Unknown	BTB/POZ domain	GO:0000003,GO:0000746,GO:0000747,GO:0003006,GO:0005575,GO:0005622,GO:0005623,GO:0005737,GO:0007049,GO:0007154,GO:0007165,GO:0007264,GO:0007265,GO:0007266,GO:0008150,GO:0009653,GO:0009987,GO:0010570,GO:0010810,GO:0010811,GO:0019953,GO:0022402,GO:0022413,GO:0022414,GO:0023052,GO:0030154,GO:0030155,GO:0030435,GO:0030437,GO:0031136,GO:0031137,GO:0031139,GO:0032005,GO:0032488,GO:0032502,GO:0032505,GO:…	NA											NA
155350	-1.16685	0.0280975	Intracellular trafficking, secretion, and vesicular transport	ARF-like small GTPases; ARF, ADP-ribosylation factor	GO:0000139,GO:0000166,GO:0000278,GO:0000281,GO:0000282,GO:0000910,GO:0000935,GO:0001558,GO:0001882,GO:0001883,GO:0003674,GO:0003676,GO:0003723,GO:0003729,GO:0003824,GO:0003924,GO:0005488,GO:0005525,GO:0005575,GO:0005622,GO:0005623,GO:0005737,GO:0005794,GO:0005829,GO:0005933,GO:0005934,GO:0005935,GO:0005938,GO:0006810,GO:0006886,GO:0006888,GO:0006897,GO:0006996,GO:0007010,GO:0007015,GO:0007049,GO:…	ARF/SAR superfamily|Ras GTPase|ARF/SAR superfamily|Ras small GTPase, Rab type|ADP-ribosylation factor|GTP-binding protein SAR1|Small GTP-binding protein|ADP-ribosylation factor		ko:K07941	ko04014,ko04072,ko04144,ko04666,map04014,map04072,map04144,map04666				ko00000,ko00001,ko04031,ko04131,ko04147				NA
155403	-1.02013	0.0270691	Function Unknown			NA											1
155404	-1.3271	0.0403215	Function Unknown	Glycosyl hydrolases family 8		Glycoside hydrolase, family 8|Blue (type 1) copper domain|Six-hairpin glycosidase-like											NA
155455	-1.48579	0.00751473	Signal transduction mechanisms	Protein tyrosine kinase	GO:0001932,GO:0001934,GO:0003674,GO:0003824,GO:0004672,GO:0004674,GO:0005575,GO:0005622,GO:0005623,GO:0005737,GO:0006464,GO:0006468,GO:0006793,GO:0006796,GO:0006807,GO:0006950,GO:0007154,GO:0007165,GO:0007346,GO:0008150,GO:0008152,GO:0009893,GO:0009987,GO:0010562,GO:0010604,GO:0010941,GO:0016301,GO:0016310,GO:0016740,GO:0016772,GO:0016773,GO:0019220,GO:0019222,GO:0019538,GO:0023014,GO:0023052,GO:…	Protein kinase, core|Serine/threonine protein kinase-related|Tyrosine protein kinase|Serine/threonine protein kinase|Protein kinase, core|Protein kinase ATP binding, conserved site|Serine/threonine protein kinase, active site|Protein kinase-like											NA
155464	-2.22527	0.00835972	Transcription	helix loop helix domain		Basic helix-loop-helix dimerisation region bHLH|Basic helix-loop-helix dimerisation region bHLH|Basic helix-loop-helix dimerisation region bHLH|Helix-loop-helix DNA-binding											NA
155487	-1.07215	0.0325152	Signal transduction mechanisms	EF-hand domain	GO:0000278,GO:0000281,GO:0000910,GO:0000912,GO:0000915,GO:0003674,GO:0005488,GO:0005515,GO:0005575,GO:0005622,GO:0005623,GO:0005737,GO:0005826,GO:0005856,GO:0005933,GO:0005934,GO:0005935,GO:0005938,GO:0006810,GO:0006903,GO:0006996,GO:0007010,GO:0007015,GO:0007049,GO:0008092,GO:0008104,GO:0008150,GO:0009987,GO:0015629,GO:0016043,GO:0016192,GO:0016459,GO:0016460,GO:0017022,GO:0022402,GO:0022607,GO:…	Calcium-binding EF-hand|Calcium-binding EF-hand|Calcium-binding EF-hand|Calcium-binding EF-hand											NA
155650	-1.34814	0.0123369	Function Unknown			NA											0.998
155672	-1.22841	0.0400064	Function Unknown	Mortierella verticillata NRRL 6337		CD9/CD37/CD63 antigen|Tetraspanin											NA
155704	-1.6044	0.023992	Function Unknown	Broad-Complex, Tramtrack and Bric a brac	GO:0000003,GO:0000746,GO:0000747,GO:0003006,GO:0005575,GO:0005622,GO:0005623,GO:0005737,GO:0007049,GO:0007154,GO:0007165,GO:0007264,GO:0007265,GO:0007266,GO:0008150,GO:0009653,GO:0009987,GO:0010570,GO:0010810,GO:0010811,GO:0019953,GO:0022402,GO:0022413,GO:0022414,GO:0023052,GO:0030154,GO:0030155,GO:0030435,GO:0030437,GO:0031136,GO:0031137,GO:0031139,GO:0032005,GO:0032488,GO:0032502,GO:0032505,GO:…	BTB/POZ|BTB/POZ-like|BTB/POZ-like|BTB/POZ fold											NA
155849	-1.46883	0.0223239	Function Unknown	Life-span regulatory factor		NA											NA
155853	-2.01679	0.00790959	Function Unknown			NA											0.984
155862	-2.0308	0.0156476	Function Unknown			NA											NA
155984	-1.87397	0.0191914	Function Unknown	Life-span regulatory factor		NA											NA
156010	-1.15533	0.00835972	Function Unknown			NA											0.999
156013	-1.0145	0.0454779	Carbohydrate transport and metabolism	UAA transporter family	GO:0000139,GO:0000271,GO:0003674,GO:0005215,GO:0005338,GO:0005457,GO:0005462,GO:0005464,GO:0005575,GO:0005622,GO:0005623,GO:0005737,GO:0005783,GO:0005789,GO:0005794,GO:0005975,GO:0005976,GO:0006022,GO:0006023,GO:0006030,GO:0006031,GO:0006037,GO:0006038,GO:0006040,GO:0006807,GO:0006810,GO:0006811,GO:0006820,GO:0008150,GO:0008152,GO:0008509,GO:0008514,GO:0009058,GO:0009059,GO:0009272,GO:0009987,GO:…	UAA transporter|UDP-galactose transporter		ko:K15278					ko00000,ko02000	2.A.7.10			0.504
156027	-1.08896	0.0241828	Function Unknown			Methyltransferase type 11											NA
156048	-1.54576	0.0167617	Intracellular trafficking, secretion, and vesicular transport	Clathrin is the major protein of the polyhedral coat of coated pits and vesicles	GO:0003674,GO:0005198,GO:0005488,GO:0005515,GO:0005575,GO:0005622,GO:0005623,GO:0005737,GO:0005768,GO:0005794,GO:0005802,GO:0005856,GO:0005938,GO:0006810,GO:0006886,GO:0006887,GO:0006897,GO:0006898,GO:0008104,GO:0008150,GO:0009987,GO:0012505,GO:0012506,GO:0015031,GO:0015629,GO:0015833,GO:0016020,GO:0016043,GO:0016192,GO:0022607,GO:0030100,GO:0030117,GO:0030118,GO:0030120,GO:0030125,GO:0030135,GO:…	Clathrin light chain											NA
156049	-2.34237	0.00751473	Transcription	helix loop helix domain		Basic helix-loop-helix dimerisation region bHLH|Basic helix-loop-helix dimerisation region bHLH|Basic helix-loop-helix dimerisation region bHLH|Helix-loop-helix DNA-binding											NA
156083	-1.63208	0.0262242	Carbohydrate transport and metabolism	Major Facilitator Superfamily		MFS general substrate transporter											NA
156084	-1.48635	0.0350194	Carbohydrate transport and metabolism	Major Facilitator Superfamily		Major facilitator superfamily MFS-1|Major facilitator superfamily|MFS general substrate transporter											NA
156095	-1.74573	0.0333638	Function Unknown	Reticulon		Reticulon|Reticulon											NA
156153	-1.13938	0.00790959	Chromatin structure and dynamics	Histone 2A	GO:0000070,GO:0000122,GO:0000228,GO:0000278,GO:0000280,GO:0000775,GO:0000781,GO:0000784,GO:0000785,GO:0000786,GO:0000788,GO:0000790,GO:0000792,GO:0000819,GO:0003674,GO:0003676,GO:0003677,GO:0005488,GO:0005575,GO:0005622,GO:0005623,GO:0005634,GO:0005657,GO:0005694,GO:0005720,GO:0005721,GO:0005724,GO:0006139,GO:0006259,GO:0006281,GO:0006282,GO:0006323,GO:0006325,GO:0006333,GO:0006342,GO:0006355,GO:…	Histone H2A|Histone H2A|Histone core|Histone H2A|Histone H2A|Histone-fold		ko:K11251	ko04217,ko05034,ko05322,map04217,map05034,map05322				ko00000,ko00001,ko03036,ko04147				NA
156156	-1.27176	0.00790959	Chromatin structure and dynamics	Mortierella verticillata NRRL 6337 histone H3 (137 aa)	GO:0000003,GO:0000075,GO:0000228,GO:0000278,GO:0000775,GO:0000785,GO:0000786,GO:0000788,GO:0000790,GO:0000792,GO:0001672,GO:0003006,GO:0003674,GO:0003676,GO:0003677,GO:0003682,GO:0005488,GO:0005575,GO:0005622,GO:0005623,GO:0005634,GO:0005657,GO:0005694,GO:0005720,GO:0005721,GO:0006139,GO:0006259,GO:0006281,GO:0006289,GO:0006323,GO:0006325,GO:0006333,GO:0006334,GO:0006351,GO:0006725,GO:0006807,GO:…	Histone H3|Histone core|Histone H3|Histone H3|Histone H3|Histone-fold		ko:K11253	ko05034,ko05202,ko05322,map05034,map05202,map05322				ko00000,ko00001,ko03036,ko04147				NA
156157	-1.221	0.00698271	Chromatin structure and dynamics	Histone 2A	GO:0000070,GO:0000122,GO:0000228,GO:0000278,GO:0000280,GO:0000775,GO:0000781,GO:0000784,GO:0000785,GO:0000786,GO:0000788,GO:0000790,GO:0000792,GO:0000819,GO:0003674,GO:0003676,GO:0003677,GO:0005488,GO:0005575,GO:0005622,GO:0005623,GO:0005634,GO:0005657,GO:0005694,GO:0005720,GO:0005721,GO:0005724,GO:0006139,GO:0006259,GO:0006281,GO:0006282,GO:0006323,GO:0006325,GO:0006333,GO:0006342,GO:0006355,GO:…	Histone H2A|Histone H2A|Histone core|Histone H2A|Histone H2A|Histone-fold		ko:K11251	ko04217,ko05034,ko05322,map04217,map05034,map05322				ko00000,ko00001,ko03036,ko04147				NA
156159	-2.01913	0.0122537	Transcription	helix loop helix domain		NA											NA
156169	-1.52806	0.027655	Signal transduction mechanisms	Kinase-like	GO:0000075,GO:0000166,GO:0000278,GO:0001100,GO:0003674,GO:0003824,GO:0004672,GO:0004674,GO:0005488,GO:0005524,GO:0005575,GO:0005622,GO:0005623,GO:0005634,GO:0005737,GO:0005815,GO:0005816,GO:0005856,GO:0005933,GO:0005935,GO:0005938,GO:0006464,GO:0006468,GO:0006793,GO:0006796,GO:0006807,GO:0007049,GO:0007088,GO:0007093,GO:0007096,GO:0007154,GO:0007165,GO:0007346,GO:0008104,GO:0008144,GO:0008150,GO:…	NA		ko:K08286					ko00000,ko01000				NA
156193	-1.12602	0.025079	Function Unknown	NA	NA	NA	NA	NA	NA	NA	NA	NA	NA	NA	NA	NA	NA
156205	-1.13962	0.0137252	Function Unknown			NA											1
156218	-1.22153	0.0336645	Function Unknown	Hydrophobic surface binding protein		NA											0.999
156342	-1.54301	0.0346374	Function Unknown			NA											1
156345	-1.33774	0.0390258	Defense mechanisms	Dual specificity phosphatase, catalytic domain		Protein-tyrosine phosphatase, dual specificity|Protein-tyrosine phosphatase, dual specificity|Protein-tyrosine phosphatase|Protein-tyrosine phosphatase, active site											NA
156381	-1.42726	0.038962	Posttranslational modification, protein turnover, chaperones	C-terminal domain of 1-Cys peroxiredoxin	GO:0000075,GO:0000077,GO:0000302,GO:0001302,GO:0003674,GO:0003824,GO:0004601,GO:0005488,GO:0005515,GO:0005575,GO:0005622,GO:0005623,GO:0005737,GO:0005829,GO:0005844,GO:0006109,GO:0006111,GO:0006139,GO:0006259,GO:0006355,GO:0006357,GO:0006457,GO:0006725,GO:0006807,GO:0006950,GO:0006974,GO:0006979,GO:0007154,GO:0007568,GO:0007569,GO:0008150,GO:0008152,GO:0008379,GO:0009056,GO:0009605,GO:0009636,GO:…	Alkyl hydroperoxide reductase/ Thiol specific antioxidant/ Mal allergen|Thioredoxin-like fold	1.11.1.15	ko:K03386	ko04214,map04214				ko00000,ko00001,ko01000,ko04147			iMM904.YDR453C	NA
156408	-2.09285	0.0213757	Function Unknown			NA											0.905
156419	-1.48502	0.0356418	Function Unknown			NA											NA
156437	-1.30632	0.0492892	Intracellular trafficking, secretion, and vesicular transport	Belongs to the small GTPase superfamily. Rho family	GO:0000166,GO:0000226,GO:0001882,GO:0001883,GO:0003674,GO:0003824,GO:0003924,GO:0005488,GO:0005525,GO:0005575,GO:0005622,GO:0005623,GO:0005737,GO:0005829,GO:0005886,GO:0005933,GO:0006996,GO:0007010,GO:0007017,GO:0007154,GO:0007163,GO:0007165,GO:0007264,GO:0008150,GO:0008360,GO:0009987,GO:0010590,GO:0010638,GO:0016020,GO:0016043,GO:0016462,GO:0016787,GO:0016817,GO:0016818,GO:0017076,GO:0017111,GO:…	Ras GTPase|Ras|Ras small GTPase, Ras type|Ras small GTPase, Rho type|Ras small GTPase, Rab type|Small GTP-binding protein		ko:K07975					ko00000,ko04031				NA
156462	-1.41422	0.0344433	Function Unknown			Methyltransferase type 11|UbiE/COQ5 methyltransferase											NA
156496	-2.09448	0.0351286	Function Unknown			NA											NA
156514	-2.01575	0.0323274	Function Unknown	Gtpase activating protein		NA											NA
156632	-1.29143	0.044886	Cell wall/membrane/envelope biogenesis	Choline/ethanolamine kinase	GO:0003674,GO:0003824,GO:0004103,GO:0004305,GO:0005575,GO:0005622,GO:0005623,GO:0005737,GO:0006629,GO:0006644,GO:0006646,GO:0006650,GO:0006656,GO:0006657,GO:0006793,GO:0006796,GO:0006807,GO:0008150,GO:0008152,GO:0008610,GO:0008654,GO:0009058,GO:0009987,GO:0016301,GO:0016310,GO:0016740,GO:0016772,GO:0016773,GO:0019637,GO:0044237,GO:0044238,GO:0044249,GO:0044255,GO:0044424,GO:0044464,GO:0045017,GO:…	Choline/ethanolamine kinase|Protein kinase-like	2.7.1.32,2.7.1.82	ko:K00866,ko:K00894	ko00564,ko01100,map00564,map01100	M00090,M00092	R01021,R01468	RC00002,RC00017	ko00000,ko00001,ko00002,ko01000				NA
156638	-1.12728	0.0348948	Intracellular trafficking, secretion, and vesicular transport	Signal peptidase subunit	GO:0003674,GO:0003824,GO:0005575,GO:0005622,GO:0005623,GO:0005737,GO:0005783,GO:0005787,GO:0005789,GO:0006465,GO:0006508,GO:0006518,GO:0006605,GO:0006807,GO:0006810,GO:0006886,GO:0008104,GO:0008150,GO:0008152,GO:0008233,GO:0009987,GO:0010467,GO:0012505,GO:0015031,GO:0015833,GO:0016020,GO:0016485,GO:0016787,GO:0019538,GO:0031984,GO:0032991,GO:0033036,GO:0033365,GO:0034613,GO:0034641,GO:0042175,GO:…	Signal peptidase 22 kDa subunit|Signal peptidase 22 kDa subunit|TonB box, conserved site		ko:K12948	ko03060,map03060				ko00000,ko00001,ko01000				0.061
156689	-1.68669	0.0378293	Function Unknown	Ricin-type beta-trefoil		Ricin B lectin|Ricin B lectin|Ricin B lectin|Ricin B-related lectin											NA
156690	-2.64683	0.0336048	Carbohydrate transport and metabolism	Lipase (class 3)		NA											NA
156704	-1.53308	0.00698271	Function Unknown			NA											1
156710	-1.69711	0.0112735	Transcription	helix loop helix domain		Basic helix-loop-helix dimerisation region bHLH|Basic helix-loop-helix dimerisation region bHLH|Basic helix-loop-helix dimerisation region bHLH|Helix-loop-helix DNA-binding											NA
156719	-2.17832	0.023992	Function Unknown	NA	NA	NA	NA	NA	NA	NA	NA	NA	NA	NA	NA	NA	0.97
156743	-1.57412	0.0386349	Function Unknown	Glycine-rich domain-containing protein-like		NA											NA
156758	-1.85425	0.0122537	Function Unknown	NA	NA	NA	NA	NA	NA	NA	NA	NA	NA	NA	NA	NA	NA
156760	-1.32016	0.0258298	Intracellular trafficking, secretion, and vesicular transport	GTP-binding Protein	GO:0000003,GO:0000166,GO:0000212,GO:0000226,GO:0000278,GO:0000281,GO:0000910,GO:0000922,GO:0001882,GO:0001883,GO:0003674,GO:0003824,GO:0003924,GO:0005488,GO:0005525,GO:0005575,GO:0005622,GO:0005623,GO:0005628,GO:0005737,GO:0005739,GO:0005740,GO:0005741,GO:0005768,GO:0005794,GO:0005802,GO:0005819,GO:0005856,GO:0005933,GO:0005935,GO:0005938,GO:0006810,GO:0006886,GO:0006887,GO:0006996,GO:0007010,GO:…	Ras GTPase|Ras|Ras small GTPase, Ras type|Ras small GTPase, Rho type|Ras small GTPase, Rab type|Ran GTPase|Small GTP-binding protein		ko:K07904,ko:K07905	ko04144,ko04152,ko04961,ko04962,ko04972,map04144,map04152,map04961,map04962,map04972				ko00000,ko00001,ko04031,ko04131,ko04147				NA
156800	-1.79063	0.0489492	Signal transduction mechanisms	Guanine nucleotide exchange factor for Ras-like GTPases; N-terminal motif		Guanine-nucleotide dissociation stimulator CDC25|Guanine-nucleotide dissociation stimulator CDC25|Guanine-nucleotide dissociation stimulator CDC25|Guanine-nucleotide dissociation stimulator CDC25|Ras guanine nucleotide exchange factor		ko:K03099	ko01521,ko01522,ko04010,ko04012,ko04013,ko04014,ko04062,ko04068,ko04072,ko04150,ko04151,ko04320,ko04510,ko04540,ko04630,ko04650,ko04660,ko04662,ko04664,ko04714,ko04722,ko04810,ko04910,ko04912,ko04915,ko04917,ko04926,ko05034,ko05160,ko05165,ko05200,ko05205,ko05206,ko05210,ko05211,ko05213,ko05214,ko05215,ko05220,ko05221,ko05223,ko05224,ko05225,ko05226,ko05231,map01521,map01522,map04010,map04012,map…				ko00000,ko00001				NA
156810	-1.58277	0.0461732	Function Unknown	Lysin motif		Peptidoglycan-binding LysM|Peptidoglycan-binding LysM											1
156848	-1.58564	0.0338779	Function Unknown			NA											NA
156893	-1.50653	0.0261695	Function Unknown			NA											0.997
156965	-1.18241	0.0116944	Cell cycle control, cell division, chromosome partitioning|Transcription	zinc finger	GO:0000976,GO:0000977,GO:0000978,GO:0000981,GO:0000982,GO:0000987,GO:0000988,GO:0000989,GO:0001012,GO:0001067,GO:0001076,GO:0003674,GO:0003676,GO:0003677,GO:0003690,GO:0003700,GO:0005488,GO:0005575,GO:0005622,GO:0005623,GO:0005634,GO:0005737,GO:0006355,GO:0006357,GO:0008150,GO:0008361,GO:0009889,GO:0009891,GO:0009893,GO:0009987,GO:0010468,GO:0010556,GO:0010557,GO:0010604,GO:0010628,GO:0016043,GO:…	Zinc finger, C2H2-type|Zinc finger, C2H2-like|Zinc finger, C2H2-type|Zinc finger, C2H2-type		ko:K19487					ko00000,ko03000				NA
156980	-1.24867	0.0452682	Function Unknown	Membrane-associating domain		NA											NA
157001	-1.1089	0.0327373	Function Unknown	Domain of unknown function (DUF4203)		NA											NA
157027	-1.86051	0.00707617	Transcription	helix loop helix domain		Basic helix-loop-helix dimerisation region bHLH|Basic helix-loop-helix dimerisation region bHLH|Basic helix-loop-helix dimerisation region bHLH|Helix-loop-helix DNA-binding											NA
157084	-1.30747	0.0333136	Cytoskeleton	Tubulin is the major constituent of microtubules. It binds two moles of GTP, one at an exchangeable site on the beta chain and one at a non-exchangeable site on the alpha chain	GO:0000003,GO:0000070,GO:0000226,GO:0000235,GO:0000278,GO:0000280,GO:0000819,GO:0000922,GO:0003674,GO:0005198,GO:0005200,GO:0005575,GO:0005622,GO:0005623,GO:0005634,GO:0005737,GO:0005815,GO:0005816,GO:0005818,GO:0005819,GO:0005827,GO:0005828,GO:0005856,GO:0005874,GO:0005876,GO:0005880,GO:0005881,GO:0006810,GO:0006928,GO:0006996,GO:0007005,GO:0007010,GO:0007017,GO:0007018,GO:0007049,GO:0007051,GO:…	Tubulin|Alpha tubulin|Tubulin/FtsZ, GTPase|Tubulin/FtsZ, C-terminal|Tubulin|Beta tubulin, autoregulation binding site|Tubulin/FtsZ, GTPase|Tubulin/FtsZ, C-terminal		ko:K07374	ko04145,ko04210,ko04530,ko04540,ko05130,map04145,map04210,map04530,map04540,map05130				ko00000,ko00001,ko03019,ko03036,ko04147,ko04812				NA
157122	-1.09745	0.0388637	Function Unknown	SWIRM domain	GO:0000003,GO:0000118,GO:0000123,GO:0000228,GO:0000785,GO:0000790,GO:0003006,GO:0003674,GO:0003676,GO:0003677,GO:0003682,GO:0003700,GO:0003712,GO:0003713,GO:0005488,GO:0005575,GO:0005622,GO:0005623,GO:0005634,GO:0005654,GO:0005694,GO:0006325,GO:0006338,GO:0006355,GO:0006357,GO:0006464,GO:0006476,GO:0006807,GO:0006996,GO:0007049,GO:0008150,GO:0008152,GO:0009653,GO:0009889,GO:0009891,GO:0009893,GO:…	SWIRM											NA
157145	-1.35297	0.0162447	Posttranslational modification, protein turnover, chaperones	Eukaryotic aspartyl protease		Peptidase A1|Peptidase A1|Peptidase aspartic, catalytic											1
157154	-1.54814	0.0146665	Cytoskeleton	CLIP1 zinc knuckle		NA											NA
157172	-1.42677	0.034	Function Unknown	Lytic transglycolase		Rare lipoprotein A|Barwin-related endoglucanase											1
157182	-1.25063	0.0223239	Amino acid transport and metabolism	Amino acid permease		Amino acid permease-associated region|Amino acid/polyamine transporter I											NA
157196	-1.0026	0.023992	Transcription	Homeodomain		NA											NA
157225	-1.81951	0.0132155	Function Unknown			NA											NA
157293	-1.0409	0.014447	Intracellular trafficking, secretion, and vesicular transport	Mortierella verticillata NRRL 6337	GO:0000166,GO:0001882,GO:0001883,GO:0003674,GO:0003824,GO:0003924,GO:0005488,GO:0005525,GO:0005575,GO:0005622,GO:0005623,GO:0005737,GO:0005794,GO:0005829,GO:0006810,GO:0006886,GO:0006888,GO:0006892,GO:0006893,GO:0006914,GO:0008104,GO:0008150,GO:0008152,GO:0009056,GO:0009987,GO:0012505,GO:0015031,GO:0015833,GO:0016192,GO:0016236,GO:0016462,GO:0016787,GO:0016817,GO:0016818,GO:0017076,GO:0017111,GO:…	ARF/SAR superfamily|Ras GTPase|ARF/SAR superfamily|Ras small GTPase, Rab type|ADP-ribosylation factor|GTP-binding protein SAR1|Small GTP-binding protein|ADP-ribosylation factor		ko:K07937,ko:K07977	ko04072,ko04144,ko05110,ko05134,map04072,map04144,map05110,map05134				ko00000,ko00001,ko04031,ko04131,ko04147				NA
157312	-1.5453	0.0133471	Function Unknown	NA	NA	NA	NA	NA	NA	NA	NA	NA	NA	NA	NA	NA	0.986
157324	-1.98073	0.00751473	Function Unknown			Ricin B lectin|Ricin B-related lectin											NA
157326	-1.04228	0.023992	Function Unknown	Mitogen-activated protein kinase kinase 1 interacting		Mitogen-activated protein kinase kinase 1 interacting|Mitogen-activated protein kinase kinase 1 interacting											NA
157414	-1.35884	0.0403215	Transcription	CCAAT-Binding transcription Factor	GO:0000429,GO:0000436,GO:0000976,GO:0000977,GO:0000978,GO:0000979,GO:0000981,GO:0000982,GO:0000987,GO:0001012,GO:0001046,GO:0001047,GO:0001067,GO:0001077,GO:0001228,GO:0003674,GO:0003676,GO:0003677,GO:0003690,GO:0003700,GO:0005488,GO:0005575,GO:0005622,GO:0005623,GO:0005634,GO:0005667,GO:0006109,GO:0006139,GO:0006351,GO:0006355,GO:0006357,GO:0006366,GO:0006725,GO:0006807,GO:0006873,GO:0006875,GO:…	CCAAT-binding transcription factor, subunit B|CCAAT-binding transcription factor, subunit B|CCAAT-binding transcription factor, subunit B|CCAAT-binding transcription factor, subunit B|CCAAT-binding transcription factor, subunit B											NA
157488	-1.4187	0.00797733	Function Unknown			NA											0.999
157490	-1.34418	0.00698271	Coenzyme transport and metabolism	Transaldolase is important for the balance of metabolites in the pentose-phosphate pathway	GO:0001300,GO:0003674,GO:0003824,GO:0004801,GO:0005575,GO:0005622,GO:0005623,GO:0005634,GO:0005654,GO:0005737,GO:0005829,GO:0005975,GO:0005996,GO:0005997,GO:0005999,GO:0006081,GO:0006098,GO:0006139,GO:0006725,GO:0006732,GO:0006733,GO:0006739,GO:0006753,GO:0006793,GO:0006796,GO:0006807,GO:0006950,GO:0006979,GO:0007154,GO:0007165,GO:0007166,GO:0007568,GO:0007569,GO:0008150,GO:0008152,GO:0009052,GO:…	Transaldolase|Transaldolase AB|Transaldolase|Transaldolase	2.2.1.2	ko:K00616	ko00030,ko01100,ko01110,ko01120,ko01130,ko01200,ko01230,map00030,map01100,map01110,map01120,map01130,map01200,map01230	M00004,M00007	R01827	RC00439,RC00604	ko00000,ko00001,ko00002,ko01000				NA
158639	-1.33728	0.0414435	Carbohydrate transport and metabolism	Glycosyltransferase family 10 (fucosyltransferase) C-term		Glycosyl transferase, family 10											NA
159312	-1.66385	0.0196438	Lipid transport and metabolism	PLD-like domain		Phospholipase D/Transphosphatidylase|Phospholipase D/Transphosphatidylase|Phospholipase D/Transphosphatidylase|Immunoglobulin E-set	3.1.4.4	ko:K01115	ko00564,ko00565,ko01100,ko01110,ko04014,ko04024,ko04071,ko04072,ko04144,ko04666,ko04724,ko04912,ko05231,map00564,map00565,map01100,map01110,map04014,map04024,map04071,map04072,map04144,map04666,map04724,map04912,map05231		R01310,R02051,R07385	RC00017,RC00425	ko00000,ko00001,ko01000,ko04131				NA
159631	-1.17307	0.0433592	Function Unknown			NA											NA
159692	-1.27195	0.0280975	Function Unknown			NA											NA
159837	-1.28351	0.014447	Signal transduction mechanisms	BAR domain	GO:0003674,GO:0005085,GO:0005086,GO:0005488,GO:0005515,GO:0005516,GO:0005575,GO:0005622,GO:0005623,GO:0005737,GO:0005794,GO:0005802,GO:0005826,GO:0005829,GO:0005856,GO:0005937,GO:0005938,GO:0006810,GO:0006897,GO:0006950,GO:0006974,GO:0007009,GO:0007163,GO:0008064,GO:0008092,GO:0008150,GO:0008360,GO:0009405,GO:0009607,GO:0009987,GO:0010256,GO:0012505,GO:0015629,GO:0016043,GO:0016192,GO:0019899,GO:…	Src homology-3|Src homology-3|Src homology-3|BAR|Src homology-3|BAR|Src homology-3|BAR|Src homology-3		ko:K12562	ko04144,ko04666,map04144,map04666				ko00000,ko00001,ko04131				NA
160053	-1.25916	0.0116944	Translation, ribosomal structure and biogenesis	RasGEF domain		Guanine-nucleotide dissociation stimulator CDC25|Ataxin-2, C-terminal|Guanine-nucleotide dissociation stimulator CDC25|Guanine-nucleotide dissociation stimulator CDC25|Ras guanine nucleotide exchange factor											NA
161620	-2.59958	0.0114632	Function Unknown			NA											NA
16228	-2.0627	0.0291117	Signal transduction mechanisms	Serine/Threonine protein kinases, catalytic domain	GO:0000003,GO:0000166,GO:0003006,GO:0003674,GO:0003824,GO:0004672,GO:0004674,GO:0005488,GO:0005524,GO:0005575,GO:0005622,GO:0005623,GO:0005634,GO:0005737,GO:0006464,GO:0006468,GO:0006793,GO:0006796,GO:0006807,GO:0007049,GO:0007154,GO:0007165,GO:0008144,GO:0008150,GO:0008152,GO:0009653,GO:0009987,GO:0010468,GO:0010564,GO:0016301,GO:0016310,GO:0016740,GO:0016772,GO:0016773,GO:0017076,GO:0019222,GO:…	Protein kinase, core|Serine/threonine protein kinase-related|Tyrosine protein kinase|Serine/threonine protein kinase|Protein kinase, core|Protein kinase ATP binding, conserved site|Serine/threonine protein kinase, active site|Protein kinase-like	2.7.11.1	ko:K12765	ko04113,map04113				ko00000,ko00001,ko01000,ko01001				NA
162634	-1.67963	0.038962	Function Unknown	Domain of unknown function (DUF4061)		NA											NA
162662	-2.03768	0.047679	Function Unknown	NA	NA	NA	NA	NA	NA	NA	NA	NA	NA	NA	NA	NA	NA
162825	-1.26184	0.0333689	Function Unknown	RhoGEF domain		Dbl homology (DH) domain|ATPase, F1/V1/A1 complex, alpha/beta subunit, nucleotide-binding|Dbl homology (DH) domain											NA
163046	-1.10032	0.00835972	Chromatin structure and dynamics	Histone H2B	GO:0000122,GO:0000228,GO:0000785,GO:0000786,GO:0000788,GO:0000790,GO:0003674,GO:0003676,GO:0003677,GO:0005488,GO:0005575,GO:0005622,GO:0005623,GO:0005634,GO:0005657,GO:0005694,GO:0006139,GO:0006259,GO:0006281,GO:0006301,GO:0006325,GO:0006333,GO:0006355,GO:0006357,GO:0006725,GO:0006807,GO:0006950,GO:0006974,GO:0006996,GO:0008150,GO:0008152,GO:0009889,GO:0009890,GO:0009892,GO:0009987,GO:0010468,GO:…	Histone H2B|Histone H2B|Histone core|Histone H2B|Histone H2B|Histone-fold		ko:K11252	ko05034,ko05203,ko05322,map05034,map05203,map05322				ko00000,ko00001,ko03036,ko04147				NA
163219	-2.16565	0.00804152	Function Unknown			NAD(P)-binding											NA
164064	-1.16557	0.0325152	Signal transduction mechanisms	Guanine nucleotide exchange factor for Ras-like GTPases; N-terminal motif		NA		ko:K03099	ko01521,ko01522,ko04010,ko04012,ko04013,ko04014,ko04062,ko04068,ko04072,ko04150,ko04151,ko04320,ko04510,ko04540,ko04630,ko04650,ko04660,ko04662,ko04664,ko04714,ko04722,ko04810,ko04910,ko04912,ko04915,ko04917,ko04926,ko05034,ko05160,ko05165,ko05200,ko05205,ko05206,ko05210,ko05211,ko05213,ko05214,ko05215,ko05220,ko05221,ko05223,ko05224,ko05225,ko05226,ko05231,map01521,map01522,map04010,map04012,map…				ko00000,ko00001				NA
164398	-1.35911	0.0489639	Function Unknown	Zinc finger, C2H2 type	GO:0000228,GO:0000429,GO:0000436,GO:0000785,GO:0000790,GO:0000981,GO:0003674,GO:0003676,GO:0003677,GO:0003700,GO:0005488,GO:0005575,GO:0005622,GO:0005623,GO:0005634,GO:0005694,GO:0005737,GO:0005829,GO:0006355,GO:0006357,GO:0006950,GO:0006970,GO:0007154,GO:0007155,GO:0007584,GO:0008150,GO:0009605,GO:0009607,GO:0009628,GO:0009651,GO:0009889,GO:0009891,GO:0009893,GO:0009987,GO:0009991,GO:0010468,GO:…	Zinc finger, C2H2-type|Zinc finger, C2H2-like|Zinc finger, C2H2-type|Zinc finger, C2H2-type		ko:K21544					ko00000,ko03000				NA
164446	-2.0894	0.0196438	Amino acid transport and metabolism	NDT80 / PhoG like DNA-binding family		NDT80/PhoG like DNA-binding|p53-like transcription factor, DNA-binding		ko:K12769	ko04113,map04113				ko00000,ko00001,ko03000				NA
165153	-3.24846	0.0455893	Function Unknown	NA	NA	NA	NA	NA	NA	NA	NA	NA	NA	NA	NA	NA	NA
165545	-1.02457	0.0403215	Function Unknown			NA											NA
165625	-1.19252	0.0400064	Function Unknown	F/Y-rich N-terminus		FY-rich, N-terminal|FY-rich, C-terminal|FY-rich, N-terminal											NA
166012	-1.02558	0.0403388	Carbohydrate transport and metabolism	Glycosyl-transferase for dystroglycan		NA											NA
166514	-1.36182	0.0196438	Function Unknown	Cooperates with the reticulon proteins and tubule- shaping DP1 family proteins to generate and maintain the structure of the tubular endoplasmic reticulum network. Has GTPase activity, which is required for its function in ER organization	GO:0000166,GO:0001882,GO:0001883,GO:0003674,GO:0003824,GO:0003924,GO:0005488,GO:0005525,GO:0005575,GO:0005622,GO:0005623,GO:0005737,GO:0005783,GO:0005933,GO:0005938,GO:0006810,GO:0006996,GO:0007029,GO:0008150,GO:0008643,GO:0008645,GO:0009405,GO:0009987,GO:0010256,GO:0012505,GO:0015749,GO:0016020,GO:0016021,GO:0016043,GO:0016192,GO:0016320,GO:0016462,GO:0016787,GO:0016817,GO:0016818,GO:0017076,GO:…	Root hair defective 3 GTP-binding											NA
166534	-1.36326	0.0213757	Function Unknown	Kelch motif		Kelch repeat type 1|Kelch repeat type 2|Galactose oxidase/kelch, beta-propeller											0.999
167825	-1.5352	0.0404415	Function Unknown			NA											0.959
168154	-1.07292	0.0199391	Function Unknown	Anp1	GO:0000030,GO:0000032,GO:0000136,GO:0000137,GO:0000139,GO:0003674,GO:0003824,GO:0005575,GO:0005622,GO:0005623,GO:0005737,GO:0005794,GO:0005795,GO:0006056,GO:0006057,GO:0006464,GO:0006486,GO:0006487,GO:0006807,GO:0008150,GO:0008152,GO:0009058,GO:0009059,GO:0009100,GO:0009101,GO:0009987,GO:0012505,GO:0016020,GO:0016021,GO:0016740,GO:0016757,GO:0016758,GO:0019538,GO:0030173,GO:0031090,GO:0031224,GO:…	Anp1		ko:K05533	ko00513,ko01100,map00513,map01100	M00074			ko00000,ko00001,ko00002,ko01000		GT62		NA
168219	-1.51655	0.0316543	Cytoskeleton	CAP_GLY		Cytoskeleton-associated protein, CAP-Gly|Cytoskeleton-associated protein, CAP-Gly|Cytoskeleton-associated protein, CAP-Gly											NA
170328	-1.8419	0.0325152	Energy production and conversion	Essential component of the vacuolar proton pump (V- ATPase), a multimeric enzyme that catalyzes the translocation of protons across the membranes. Required for assembly and activity of the V-ATPase	GO:0000166,GO:0000220,GO:0000322,GO:0000323,GO:0000324,GO:0000329,GO:0003674,GO:0003824,GO:0005215,GO:0005488,GO:0005515,GO:0005524,GO:0005575,GO:0005622,GO:0005623,GO:0005737,GO:0005768,GO:0005770,GO:0005773,GO:0005774,GO:0005794,GO:0006082,GO:0006139,GO:0006163,GO:0006164,GO:0006725,GO:0006753,GO:0006754,GO:0006793,GO:0006796,GO:0006797,GO:0006807,GO:0006810,GO:0006811,GO:0006812,GO:0006873,GO:…	ATPase, V0/A0 complex, 116-kDa subunit		ko:K02154	ko00190,ko01100,ko04142,ko04145,ko04721,ko04966,ko05110,ko05120,ko05152,ko05165,ko05323,map00190,map01100,map04142,map04145,map04721,map04966,map05110,map05120,map05152,map05165,map05323	M00160			ko00000,ko00001,ko00002,ko04147	3.A.2.2			NA
170604	-1.02806	0.0280515	Function Unknown	Glycosyl transferase family 21		Glycosyl transferase, family 2											NA
17136	-2.17597	0.0162447	Lipid transport and metabolism	Emopamil binding protein		Emopamil-binding											NA
171372	-1.29543	0.0265454	Replication, recombination and repair	Fibronectin type 3 domain	GO:0000003,GO:0000746,GO:0000747,GO:0005575,GO:0005622,GO:0005623,GO:0005737,GO:0005768,GO:0005769,GO:0005794,GO:0005798,GO:0005802,GO:0006139,GO:0006259,GO:0006260,GO:0006261,GO:0006270,GO:0006725,GO:0006807,GO:0006810,GO:0006892,GO:0006893,GO:0006895,GO:0006896,GO:0007034,GO:0008150,GO:0008152,GO:0009058,GO:0009059,GO:0009987,GO:0012505,GO:0016192,GO:0016482,GO:0019953,GO:0022414,GO:0030133,GO:…	Fibronectin, type III|BRCT|BRCT|BRCT|Fibronectin, type III|Fibronectin, type III-like fold|BRCT		ko:K19877					ko00000,ko04131				NA
171764	-1.59642	0.0149047	Signal transduction mechanisms	Pleckstrin homology domain	GO:0000003,GO:0000131,GO:0000278,GO:0000281,GO:0000282,GO:0000746,GO:0000747,GO:0000753,GO:0000767,GO:0000902,GO:0000910,GO:0000935,GO:0003006,GO:0003674,GO:0005085,GO:0005088,GO:0005089,GO:0005488,GO:0005515,GO:0005575,GO:0005622,GO:0005623,GO:0005634,GO:0005737,GO:0005819,GO:0005856,GO:0005886,GO:0005933,GO:0005934,GO:0005935,GO:0005937,GO:0005938,GO:0006996,GO:0007010,GO:0007049,GO:0007088,GO:…	Octicosapeptide/Phox/Bem1p|Dbl homology (DH) domain|CDC24 calponin|Pleckstrin-like|Dbl homology (DH) domain|Octicosapeptide/Phox/Bem1p|Pleckstrin-like|Dbl homology (DH) domain|Guanine-nucleotide dissociation stimulator, CDC24, conserved site|Calponin-homology|Dbl homology (DH) domain		ko:K11236	ko04011,map04011				ko00000,ko00001				NA
172598	-1.08062	0.0404415	Function Unknown	Protein of unknown function (DUF3808)		NA											NA
174255	-1.22673	0.0285949	Signal transduction mechanisms	Serine/Threonine protein kinases, catalytic domain	GO:0000166,GO:0000749,GO:0003674,GO:0003824,GO:0004672,GO:0004674,GO:0005488,GO:0005524,GO:0005575,GO:0005622,GO:0005623,GO:0005634,GO:0005737,GO:0005886,GO:0005937,GO:0006464,GO:0006468,GO:0006793,GO:0006796,GO:0006807,GO:0006810,GO:0006811,GO:0006820,GO:0006869,GO:0007154,GO:0007165,GO:0008144,GO:0008150,GO:0008152,GO:0009987,GO:0010033,GO:0010876,GO:0015711,GO:0015748,GO:0015914,GO:0016020,GO:…	Protein kinase, core|Serine/threonine protein kinase-related|Tyrosine protein kinase|Serine/threonine protein kinase|Protein kinase, core|Protein kinase-like		ko:K08286					ko00000,ko01000				NA
175021	-1.34036	0.019462	Intracellular trafficking, secretion, and vesicular transport	Legume-like lectin family	GO:0006810,GO:0006888,GO:0008150,GO:0016192,GO:0046907,GO:0048193,GO:0051179,GO:0051234,GO:0051641,GO:0051649	Legume-like lectin|Concanavalin A-like lectin/glucanase		ko:K10082	ko04141,map04141				ko00000,ko00001,ko04091,ko04131				NA
175612	-1.6291	0.0403388	Intracellular trafficking, secretion, and vesicular transport	Golgi membrane protein involved in vesicular trafficking	GO:0000139,GO:0002790,GO:0005575,GO:0005622,GO:0005623,GO:0005737,GO:0005794,GO:0006810,GO:0008104,GO:0008150,GO:0009306,GO:0009987,GO:0012505,GO:0015031,GO:0015833,GO:0016020,GO:0016021,GO:0016192,GO:0030173,GO:0031090,GO:0031224,GO:0031228,GO:0031300,GO:0031301,GO:0031984,GO:0032940,GO:0033036,GO:0042886,GO:0043226,GO:0043227,GO:0043229,GO:0043231,GO:0044422,GO:0044424,GO:0044425,GO:0044431,GO:…	Protein of unknown function DUF846, eukaryotic											NA
176054	-1.96914	0.0479259	Cell cycle control, cell division, chromosome partitioning|Signal transduction mechanisms	G protein alpha subunit	GO:0000003,GO:0000165,GO:0000746,GO:0000747,GO:0000749,GO:0000750,GO:0001664,GO:0003674,GO:0003824,GO:0003924,GO:0005102,GO:0005488,GO:0005515,GO:0005575,GO:0005622,GO:0005623,GO:0005737,GO:0005834,GO:0005886,GO:0005938,GO:0006464,GO:0006468,GO:0006793,GO:0006796,GO:0006807,GO:0007154,GO:0007165,GO:0007186,GO:0007187,GO:0007188,GO:0008150,GO:0008152,GO:0008277,GO:0009898,GO:0009966,GO:0009968,GO:…	NA		ko:K04630,ko:K04640	ko04015,ko04022,ko04024,ko04062,ko04071,ko04261,ko04360,ko04371,ko04540,ko04611,ko04670,ko04713,ko04723,ko04724,ko04725,ko04726,ko04727,ko04728,ko04730,ko04914,ko04915,ko04916,ko04921,ko04923,ko04924,ko04926,ko04934,ko04971,ko05012,ko05030,ko05032,ko05034,ko05133,ko05142,ko05145,ko05200,map04015,map04022,map04024,map04062,map04071,map04261,map04360,map04371,map04540,map04611,map04670,map04713,map…	M00695			ko00000,ko00001,ko00002,ko04031,ko04147				NA
176847	-1.03434	0.0403215	Energy production and conversion	Subunit of the peripheral V1 complex of vacuolar ATPase essential for assembly or catalytic function. V-ATPase is responsible for acidifying a variety of intracellular compartments in eukaryotic cells	GO:0000221,GO:0000322,GO:0000323,GO:0000324,GO:0000329,GO:0003674,GO:0003824,GO:0005215,GO:0005575,GO:0005622,GO:0005623,GO:0005737,GO:0005773,GO:0005774,GO:0006810,GO:0006811,GO:0006812,GO:0006873,GO:0006885,GO:0007035,GO:0008150,GO:0008324,GO:0009987,GO:0015075,GO:0015077,GO:0015078,GO:0015318,GO:0015399,GO:0015405,GO:0015672,GO:0015988,GO:0015991,GO:0016020,GO:0016021,GO:0016462,GO:0016469,GO:…	ATPase, V1/A1 complex, subunit F|ATPase, V1 complex, subunit F, eukaryotic|ATPase, V1 complex, subunit F, eukaryotic		ko:K02151	ko00190,ko01100,ko04145,ko04150,ko04721,ko04966,ko05110,ko05120,ko05323,map00190,map01100,map04145,map04150,map04721,map04966,map05110,map05120,map05323	M00160			ko00000,ko00001,ko00002	3.A.2.2		iMM904.YGR020C,iND750.YGR020C	NA
177085	-1.71166	0.0156549	Function Unknown	WD domain, G-beta repeat	GO:0000429,GO:0000430,GO:0000433,GO:0000749,GO:0000750,GO:0001403,GO:0001678,GO:0003674,GO:0005198,GO:0005488,GO:0005515,GO:0005575,GO:0005622,GO:0005623,GO:0005834,GO:0005886,GO:0005937,GO:0006355,GO:0006357,GO:0007154,GO:0007165,GO:0007186,GO:0007187,GO:0007188,GO:0007189,GO:0007584,GO:0008150,GO:0008277,GO:0009605,GO:0009606,GO:0009743,GO:0009746,GO:0009749,GO:0009756,GO:0009757,GO:0009889,GO:…	WD40 repeat|G-protein, beta subunit|WD40 repeat|WD40 repeat|Guanine nucleotide-binding protein, beta subunit|WD40 repeat|WD40 repeat|WD40 repeat|WD40 repeat|WD40 repeat-like		ko:K04536	ko04011,ko04014,ko04062,ko04151,ko04371,ko04713,ko04723,ko04724,ko04725,ko04726,ko04727,ko04728,ko04740,ko04744,ko04926,ko05032,ko05034,ko05167,ko05200,map04011,map04014,map04062,map04151,map04371,map04713,map04723,map04724,map04725,map04726,map04727,map04728,map04740,map04744,map04926,map05032,map05034,map05167,map05200				ko00000,ko00001,ko04031,ko04147				NA
177396	-1.46838	0.0289272	Cell wall/membrane/envelope biogenesis	C2 domain	GO:0003674,GO:0005488,GO:0005543,GO:0005575,GO:0005622,GO:0005623,GO:0005737,GO:0005739,GO:0005783,GO:0005794,GO:0005886,GO:0005933,GO:0005938,GO:0006996,GO:0007029,GO:0008150,GO:0008289,GO:0009987,GO:0010256,GO:0012505,GO:0016020,GO:0016043,GO:0019216,GO:0019220,GO:0019222,GO:0022406,GO:0031323,GO:0031410,GO:0031982,GO:0031984,GO:0032541,GO:0035303,GO:0043167,GO:0043168,GO:0043226,GO:0043227,GO:…	C2 calcium-dependent membrane targeting|C2 calcium-dependent membrane targeting|C2 calcium-dependent membrane targeting|C2 calcium-dependent membrane targeting|C2 calcium/lipid-binding region, CaLB											NA
179580	-1.69242	0.0254164	Function Unknown	ChAPs (Chs5p-Arf1p-binding proteins)	GO:0000271,GO:0000278,GO:0000281,GO:0000282,GO:0000910,GO:0003674,GO:0005488,GO:0005515,GO:0005575,GO:0005622,GO:0005623,GO:0005634,GO:0005737,GO:0005794,GO:0005798,GO:0005975,GO:0005976,GO:0006022,GO:0006023,GO:0006030,GO:0006031,GO:0006037,GO:0006038,GO:0006040,GO:0006807,GO:0006810,GO:0006892,GO:0006893,GO:0006896,GO:0007034,GO:0007049,GO:0007163,GO:0008104,GO:0008150,GO:0008152,GO:0009058,GO:…	Chs5p-Arf1p binding|Tetratricopeptide region		ko:K19881					ko00000,ko04131				NA
183757	-1.07915	0.0354329	Cell wall/membrane/envelope biogenesis	Mortierella verticillata NRRL 6337	GO:0003674,GO:0003824,GO:0003977,GO:0005575,GO:0005622,GO:0005623,GO:0005634,GO:0005737,GO:0005829,GO:0006040,GO:0006047,GO:0006048,GO:0006139,GO:0006725,GO:0006793,GO:0006807,GO:0008150,GO:0008152,GO:0009058,GO:0009225,GO:0009226,GO:0009987,GO:0016740,GO:0016772,GO:0016779,GO:0018130,GO:0019438,GO:0034641,GO:0034654,GO:0043226,GO:0043227,GO:0043229,GO:0043231,GO:0044237,GO:0044238,GO:0044249,GO:…	UTP--glucose-1-phosphate uridylyltransferase	2.7.7.23,2.7.7.83	ko:K00972	ko00520,ko01100,ko01130,map00520,map01100,map01130	M00361,M00362	R00416	RC00002	ko00000,ko00001,ko00002,ko01000				NA
184024	-1.58798	0.022804	Function Unknown	Ras subfamily of RAS small GTPases	GO:0000003,GO:0000278,GO:0000281,GO:0000282,GO:0000746,GO:0000747,GO:0000755,GO:0000910,GO:0003674,GO:0003824,GO:0003924,GO:0005575,GO:0005622,GO:0005623,GO:0005737,GO:0005783,GO:0005886,GO:0005933,GO:0005935,GO:0007049,GO:0007114,GO:0007120,GO:0007121,GO:0007154,GO:0007163,GO:0007165,GO:0007264,GO:0008104,GO:0008150,GO:0009987,GO:0012505,GO:0016020,GO:0016462,GO:0016787,GO:0016817,GO:0016818,GO:…	Ras GTPase|Ras|Ras small GTPase, Ras type|Ras small GTPase, Rho type|Ras small GTPase, Rab type|Ran GTPase|Small GTP-binding protein		ko:K04353,ko:K07836,ko:K07837	ko04010,ko04014,ko04015,ko04024,ko04062,ko04510,ko04530,ko04611,ko04670,ko04720,ko04722,ko04934,ko04972,ko05211,map04010,map04014,map04015,map04024,map04062,map04510,map04530,map04611,map04670,map04720,map04722,map04934,map04972,map05211				ko00000,ko00001,ko04031,ko04147				NA
184200	-1.92019	0.0247028	Function Unknown			Heat shock protein DnaJ, N-terminal											NA
184251	-2.01299	0.0484844	Function Unknown	GAL4-like Zn(II)2Cys6 (or C6 zinc) binuclear cluster DNA-binding domain		Fungal transcriptional regulatory protein, N-terminal|Fungal transcriptional regulatory protein, N-terminal|Fungal transcriptional regulatory protein, N-terminal|Fungal transcriptional regulatory protein, N-terminal											NA
185005	-1.36501	0.0262782	Function Unknown	NA	NA	Cyclin-like F-box	NA	NA	NA	NA	NA	NA	NA	NA	NA	NA	NA
186942	-1.61402	0.0206601	Cytoskeleton	Kinesin protein 1B		Kinesin, motor region|Pleckstrin-like|Kinesin, motor region|Forkhead-associated|Kinesin, motor region|Pleckstrin-like|Forkhead-associated|Pleckstrin-like|Forkhead-associated|Kinesin, motor region|Kinesin, motor region|SMAD/FHA domain		ko:K10392					ko00000,ko04812				NA
187060	-1.54751	0.0139626	Inorganic ion transport and metabolism	Alkaline phosphatase homologues	GO:0000322,GO:0000323,GO:0000324,GO:0000329,GO:0003674,GO:0003824,GO:0004035,GO:0005575,GO:0005622,GO:0005623,GO:0005737,GO:0005773,GO:0005774,GO:0006139,GO:0006464,GO:0006470,GO:0006725,GO:0006732,GO:0006733,GO:0006753,GO:0006793,GO:0006796,GO:0006807,GO:0008150,GO:0008152,GO:0009117,GO:0009987,GO:0016020,GO:0016311,GO:0016787,GO:0016788,GO:0016791,GO:0019362,GO:0019538,GO:0019637,GO:0031090,GO:…	Alkaline phosphatase|Alkaline phosphatase|Alkaline phosphatase|Alkaline phosphatase|Alkaline-phosphatase-like, core domain	3.1.3.1	ko:K01077	ko00730,ko00790,ko01100,ko02020,map00730,map00790,map01100,map02020	M00126	R02135,R04620	RC00017	ko00000,ko00001,ko00002,ko00537,ko01000,ko04147				NA
187228	-1.38403	0.0163355	Carbohydrate transport and metabolism	Mortierella verticillata NRRL 6337		Hexokinase|Hexokinase|Hexokinase|Hexokinase											NA
189752	-1.54079	0.038962	Intracellular trafficking, secretion, and vesicular transport	Major Facilitator Superfamily		Major facilitator superfamily MFS-1|MFS general substrate transporter											NA
190162	-1.83824	0.0128859	Function Unknown			NA											NA
190174	-1.00741	0.0163355	Function Unknown	Phosphate-induced protein 1 conserved region		NA											1
191327	-1.06207	0.00974224	Function Unknown	Protein of unknown function (DUF3808)		NA											NA
23309	-1.80087	0.04476	Intracellular trafficking, secretion, and vesicular transport	Putative serine esterase (DUF676)		PGAP1-like|Lipase, active site											NA
23994	-1.36054	0.0390258	Function Unknown			NA											NA
35169	-2.27348	0.0460954	Function Unknown	fungal protein	GO:0003674,GO:0005215,GO:0006810,GO:0008150,GO:0022857,GO:0051179,GO:0051234,GO:0055085	NA											NA
36468	-1.32913	0.047679	Posttranslational modification, protein turnover, chaperones|Inorganic ion transport and metabolism|Intracellular trafficking, secretion, and vesicular transport	VTC domain		Protein of unknown function DUF202|SPX, N-terminal											NA
38049	-1.27009	0.0212566	Function Unknown	Rgs domain protein	GO:0000278,GO:0000281,GO:0000282,GO:0000322,GO:0000323,GO:0000324,GO:0000910,GO:0005575,GO:0005622,GO:0005623,GO:0005737,GO:0005773,GO:0005886,GO:0005933,GO:0005935,GO:0007049,GO:0007163,GO:0008104,GO:0008150,GO:0009987,GO:0016020,GO:0016021,GO:0022402,GO:0030010,GO:0030427,GO:0031224,GO:0033036,GO:0043226,GO:0043227,GO:0043229,GO:0043231,GO:0044424,GO:0044425,GO:0044444,GO:0044464,GO:0051179,GO:…	Regulator of G protein signalling|Regulator of G protein signalling superfamily											NA
39266	-1.32773	0.0393672	Function Unknown	Presenilin, signal peptide peptidase, family	GO:0000323,GO:0003674,GO:0003824,GO:0004175,GO:0004190,GO:0005575,GO:0005622,GO:0005623,GO:0005737,GO:0005764,GO:0005765,GO:0005773,GO:0005774,GO:0005783,GO:0005789,GO:0005798,GO:0006508,GO:0006511,GO:0006807,GO:0006950,GO:0007154,GO:0008150,GO:0008152,GO:0008233,GO:0009056,GO:0009057,GO:0009267,GO:0009605,GO:0009987,GO:0009991,GO:0010033,GO:0010243,GO:0010498,GO:0012505,GO:0016020,GO:0016021,GO:…	Peptidase A22B, signal peptide peptidase|Peptidase A22, presenilin signal peptide		ko:K09595					ko00000,ko01000,ko01002				NA
43544	-1.68328	0.0264158	Posttranslational modification, protein turnover, chaperones	Subtilase family		Peptidase S8 and S53, subtilisin, kexin, sedolisin|Peptidase S8 and S53, subtilisin, kexin, sedolisin|Peptidase S8 and S53, subtilisin, kexin, sedolisin|Peptidase S8 and S53, subtilisin, kexin, sedolisin|Peptidase S8 and S53, subtilisin, kexin, sedolisin|Peptidase aspartic, active site|Peptidase S8 and S53, subtilisin, kexin, sedolisin											NA
46224	-1.01463	0.0344433	Transcription	high mobility group	GO:0000228,GO:0000785,GO:0000790,GO:0001192,GO:0001195,GO:0003674,GO:0003676,GO:0003677,GO:0003682,GO:0005488,GO:0005575,GO:0005622,GO:0005623,GO:0005634,GO:0005694,GO:0006139,GO:0006259,GO:0006281,GO:0006298,GO:0006323,GO:0006325,GO:0006333,GO:0006334,GO:0006338,GO:0006351,GO:0006352,GO:0006354,GO:0006355,GO:0006357,GO:0006366,GO:0006367,GO:0006383,GO:0006384,GO:0006385,GO:0006725,GO:0006807,GO:…	High mobility group box, HMG1/HMG2|High mobility group box, HMG1/HMG2|High mobility group box, HMG1/HMG2|High mobility group box, HMG											NA
51349	-1.01593	0.0243799	Signal transduction mechanisms	Translation initiation factor IF-2, N-terminal region	GO:0000003,GO:0000935,GO:0003006,GO:0003674,GO:0003824,GO:0005488,GO:0005543,GO:0005575,GO:0005622,GO:0005623,GO:0005634,GO:0005886,GO:0006629,GO:0006644,GO:0006650,GO:0006793,GO:0006796,GO:0007049,GO:0008150,GO:0008152,GO:0008289,GO:0009653,GO:0009987,GO:0010927,GO:0016020,GO:0016043,GO:0016301,GO:0016307,GO:0016308,GO:0016310,GO:0016740,GO:0016772,GO:0016773,GO:0019637,GO:0019953,GO:0022402,GO:…	Phosphatidylinositol-4-phosphate 5-kinase, core|Phosphatidylinositol-4-phosphate 5-kinase, core, subgroup	2.7.1.68	ko:K00889	ko00562,ko01100,ko04011,ko04070,ko04072,ko04139,ko04144,ko04666,ko04810,ko05231,map00562,map01100,map04011,map04070,map04072,map04139,map04144,map04666,map04810,map05231	M00130	R03469	RC00002,RC00078	ko00000,ko00001,ko00002,ko01000,ko04131				NA
72002	-2.69065	0.028614	Secondary metabolites biosynthesis, transport and catabolism	short chain dehydrogenase reductase		Short-chain dehydrogenase/reductase SDR|Glucose/ribitol dehydrogenase|Short-chain dehydrogenase/reductase SDR|Short-chain dehydrogenase/reductase SDR|NAD(P)-binding											NA
77082	-1.52549	0.014447	Amino acid transport and metabolism	NDT80 / PhoG like DNA-binding family		NDT80/PhoG like DNA-binding|p53-like transcription factor, DNA-binding		ko:K12769	ko04113,map04113				ko00000,ko00001,ko03000				NA
78586	-1.3209	0.0139626	Posttranslational modification, protein turnover, chaperones	Gaa1-like, GPI transamidase component	GO:0005575,GO:0005622,GO:0005623,GO:0005737,GO:0005783,GO:0005789,GO:0006464,GO:0006497,GO:0006505,GO:0006506,GO:0006629,GO:0006643,GO:0006644,GO:0006650,GO:0006661,GO:0006664,GO:0006793,GO:0006796,GO:0006807,GO:0008150,GO:0008152,GO:0008610,GO:0008654,GO:0009058,GO:0009059,GO:0009247,GO:0009987,GO:0012505,GO:0016020,GO:0016021,GO:0016255,GO:0019538,GO:0019637,GO:0030176,GO:0031224,GO:0031227,GO:…	Gaa1-like, GPI transamidase component		ko:K05289	ko00563,ko01100,map00563,map01100				ko00000,ko00001				NA
79024	-2.13042	0.0334406	Function Unknown	Transcription factor Opi1	GO:0000122,GO:0003674,GO:0003712,GO:0003714,GO:0005488,GO:0005543,GO:0005575,GO:0005622,GO:0005623,GO:0005634,GO:0005635,GO:0005654,GO:0005737,GO:0005783,GO:0006355,GO:0006357,GO:0006629,GO:0006644,GO:0006793,GO:0006796,GO:0006950,GO:0006986,GO:0007154,GO:0007165,GO:0008150,GO:0008152,GO:0008289,GO:0008610,GO:0008654,GO:0009058,GO:0009889,GO:0009890,GO:0009891,GO:0009892,GO:0009893,GO:0009987,GO:…	Transcription factor Opi1		ko:K21642					ko00000,ko03000				NA
79871	-1.63219	0.0186824	Function Unknown			NA											NA
80751	-2.17682	0.0258298	Function Unknown	Protein of unknown function (DUF3808)	GO:0005575,GO:0005622,GO:0005623,GO:0005634,GO:0005737,GO:0005739,GO:0005740,GO:0005741,GO:0006950,GO:0008150,GO:0009987,GO:0010033,GO:0016020,GO:0019867,GO:0031090,GO:0031966,GO:0031967,GO:0031968,GO:0031975,GO:0033554,GO:0035966,GO:0035967,GO:0042221,GO:0043226,GO:0043227,GO:0043229,GO:0043231,GO:0044422,GO:0044424,GO:0044429,GO:0044444,GO:0044446,GO:0044464,GO:0050896,GO:0051716,GO:0051788,GO:…	NA											NA
80886	-1.43123	0.0354329	Function Unknown			NA											0.968
81230	-1.98654	0.0128142	Inorganic ion transport and metabolism	Divalent cation transporter		MgtE integral membrane region		ko:K15122					ko00000,ko02000	1.A.26.2			NA
83093	-1.93989	0.0417622	Function Unknown	RhoGEF domain		Pleckstrin-like|Dbl homology (DH) domain|Pleckstrin-like|Dbl homology (DH) domain|Pleckstrin-like|Dbl homology (DH) domain|Dbl homology (DH) domain											NA
83143	-1.51907	0.0101346	Transcription	Homeodomain		Homeobox|Homeobox|Homeobox|Homeobox|Homeobox|Homeobox|Homeodomain-like											NA
83961	-1.33639	0.03618	Function Unknown	NA	NA	NA	NA	NA	NA	NA	NA	NA	NA	NA	NA	NA	NA
84216	-2.05776	0.0198909	Inorganic ion transport and metabolism	Ferroportin1 (FPN1)		Ferroportin1|MFS general substrate transporter		ko:K14685	ko04216,ko04978,map04216,map04978				ko00000,ko00001,ko02000	2.A.100.1			NA
84688	-1.37227	0.039308	Function Unknown			NA											NA
85600	-1.66661	0.0128859	Function Unknown			Zinc finger, GATA-type|Zinc finger, GATA-type											NA
86060	-1.16755	0.0258298	Signal transduction mechanisms	Serine/Threonine protein kinases, catalytic domain	GO:0000003,GO:0003006,GO:0003674,GO:0003824,GO:0004672,GO:0004674,GO:0004712,GO:0004713,GO:0005575,GO:0005622,GO:0005623,GO:0005737,GO:0006464,GO:0006468,GO:0006508,GO:0006793,GO:0006796,GO:0006807,GO:0006950,GO:0006970,GO:0007049,GO:0007088,GO:0007346,GO:0008150,GO:0008152,GO:0009266,GO:0009408,GO:0009628,GO:0009651,GO:0009653,GO:0009894,GO:0009987,GO:0010564,GO:0016301,GO:0016310,GO:0016740,GO:…	Protein kinase, core|Serine/threonine protein kinase-related|Tyrosine protein kinase|Serine/threonine protein kinase|Protein kinase, core|Protein kinase ATP binding, conserved site|Serine/threonine protein kinase, active site|Protein kinase-like	2.7.11.1,2.7.11.26	ko:K03083,ko:K08282,ko:K12766	ko01521,ko04012,ko04062,ko04110,ko04113,ko04150,ko04151,ko04310,ko04340,ko04341,ko04360,ko04390,ko04510,ko04550,ko04657,ko04660,ko04662,ko04711,ko04722,ko04728,ko04910,ko04916,ko04917,ko04919,ko04931,ko04932,ko04934,ko05010,ko05160,ko05162,ko05164,ko05165,ko05166,ko05167,ko05169,ko05200,ko05210,ko05213,ko05215,ko05217,ko05224,ko05225,ko05226,map01521,map04012,map04062,map04110,map04113,map04150,m…	M00677			ko00000,ko00001,ko00002,ko01000,ko01001,ko03036				NA
86091	-1.01235	0.00804152	Function Unknown			NA											NA
86179	-1.59406	0.0252633	Function Unknown			NA											1
86240	-2.29337	0.0356534	Function Unknown			Claudin											NA
87831	-1.23439	0.0209716	Signal transduction mechanisms	Protein tyrosine kinase	GO:0001932,GO:0001934,GO:0003674,GO:0003824,GO:0004672,GO:0004674,GO:0005575,GO:0005622,GO:0005623,GO:0005737,GO:0006464,GO:0006468,GO:0006793,GO:0006796,GO:0006807,GO:0006950,GO:0007154,GO:0007165,GO:0007346,GO:0008150,GO:0008152,GO:0009893,GO:0009987,GO:0010562,GO:0010604,GO:0010941,GO:0016301,GO:0016310,GO:0016740,GO:0016772,GO:0016773,GO:0019220,GO:0019222,GO:0019538,GO:0023014,GO:0023052,GO:…	Protein kinase, core|Serine/threonine protein kinase-related|Tyrosine protein kinase|Serine/threonine protein kinase|Protein kinase, core|Protein kinase ATP binding, conserved site|Serine/threonine protein kinase, active site|Protein kinase-like											NA
88516	-1.80069	0.0249382	Carbohydrate transport and metabolism	Polysaccharide deacetylase	GO:0000003,GO:0003006,GO:0003674,GO:0003824,GO:0004099,GO:0005575,GO:0005618,GO:0005619,GO:0005623,GO:0005628,GO:0005631,GO:0007049,GO:0008150,GO:0009272,GO:0009277,GO:0009653,GO:0009987,GO:0010927,GO:0016020,GO:0016043,GO:0016787,GO:0016810,GO:0016811,GO:0019213,GO:0019953,GO:0022402,GO:0022413,GO:0022414,GO:0022607,GO:0030154,GO:0030312,GO:0030435,GO:0030437,GO:0030476,GO:0031160,GO:0031505,GO:…	Polysaccharide deacetylase|Glycoside hydrolase/deacetylase, beta/alpha-barrel	3.5.1.41	ko:K01452	ko00520,ko01100,map00520,map01100		R02333	RC00166,RC00300	ko00000,ko00001,ko01000				0.999
88531	-1.40611	0.0310357	Signal transduction mechanisms	Guanine nucleotide exchange factor for Ras-like small GTPases		Ras guanine nucleotide exchange factor											NA
91282	-1.58446	0.0403215	Function Unknown			NA											NA
94625	-1.10668	0.0291117	Carbohydrate transport and metabolism	Nucleotide-diphospho-sugar transferase		NA											NA
95127	-3.96049	0.0217234	Posttranslational modification, protein turnover, chaperones	ATP-dependent protease La (LON) substrate-binding domain		NA											NA
