# Supplementary material for: A Mucoralean White Collar-1 Photoreceptor Controls Virulence by Regulating an Intricate Gene-Network during Host Interactions.
Source: Preprints.org preprint supplement (doi:10.20944/preprints202012.0804.v1), 2020-12-31
Supplement: Supplementary file 5 [file tableS3.xlsx]

## Sheet: cluster2
GeneID	logFC_WC1aM.R7BM	adj_pvalue	KOG.Class	KOG.def	GOs	iprDesc	EC	KEGG_ko	KEGG_Pathway	KEGG_Module	KEGG_Reaction	KEGG_rclass	BRITE	KEGG_TC	CAZy	BiGG_Reaction	hmm_signalpep_probability
104250	1.47488	0.0228665	Function Unknown			NA											NA
104299	1.33227	0.0470981	Function Unknown	NA	NA	NA	NA	NA	NA	NA	NA	NA	NA	NA	NA	NA	NA
104920	2.21184	0.0164781	Function Unknown			NA											NA
105379	1.8336	0.0323274	Energy production and conversion	L-lactate permease		L-lactate permease|L-lactate permease											NA
105510	1.02734	0.023992	Function Unknown	corpus callosum morphogenesis		NA											NA
106110	1.75685	0.0100202	Function Unknown			p53, tetramerisation											NA
106234	2.47154	0.00905257	Lipid transport and metabolism	Catalyzes the formation of phosphatidylethanolamine (PtdEtn) from phosphatidylserine (PtdSer). Plays a central role in phospholipid metabolism and in the interorganelle trafficking of phosphatidylserine		Phosphatidylserine decarboxylase-related|Phosphatidylserine decarboxylase											NA
107235	1.12482	0.0378442	Function Unknown	NA	NA	NA	NA	NA	NA	NA	NA	NA	NA	NA	NA	NA	NA
108028	1.10611	0.0325152	Function Unknown	NA	NA	NA	NA	NA	NA	NA	NA	NA	NA	NA	NA	NA	NA
108202	1.47717	0.0249745	Function Unknown	NA	NA	NA	NA	NA	NA	NA	NA	NA	NA	NA	NA	NA	NA
108277	2.75855	0.0110687	Inorganic ion transport and metabolism	Thiamine pyrophosphate enzyme, N-terminal TPP binding domain	GO:0000947,GO:0000949,GO:0000955,GO:0003674,GO:0003824,GO:0004737,GO:0005575,GO:0005622,GO:0005623,GO:0005975,GO:0005996,GO:0006006,GO:0006066,GO:0006067,GO:0006082,GO:0006090,GO:0006091,GO:0006113,GO:0006115,GO:0006139,GO:0006163,GO:0006520,GO:0006558,GO:0006559,GO:0006568,GO:0006569,GO:0006576,GO:0006586,GO:0006725,GO:0006732,GO:0006733,GO:0006753,GO:0006793,GO:0006796,GO:0006807,GO:0008150,GO:…	Thiamine pyrophosphate enzyme, central region|Thiamine pyrophosphate enzyme, C-terminal TPP-binding|Thiamine pyrophosphate enzyme, N-terminal TPP binding region|Pyruvate decarboxylase/indolepyruvate decarboxylase	4.1.1.1	ko:K01568	ko00010,ko01100,ko01110,ko01130,map00010,map01100,map01110,map01130		R00014,R00755	RC00027,RC00375,RC02744	ko00000,ko00001,ko01000				NA
108494	1.02587	0.0449882	Transcription	helix loop helix domain		Basic helix-loop-helix dimerisation region bHLH|Basic helix-loop-helix dimerisation region bHLH|Basic helix-loop-helix dimerisation region bHLH|Helix-loop-helix DNA-binding											NA
108793	2.30537	0.022804	Function Unknown	Zinc-finger of C2H2 type		NA											NA
109156	1.01583	0.00903075	Signal transduction mechanisms	Domain found in Dishevelled, Egl-10, and Pleckstrin (DEP)	GO:0000131,GO:0000920,GO:0003674,GO:0005085,GO:0005088,GO:0005089,GO:0005488,GO:0005515,GO:0005575,GO:0005622,GO:0005623,GO:0005737,GO:0005826,GO:0005856,GO:0005933,GO:0005935,GO:0005938,GO:0006109,GO:0007154,GO:0007165,GO:0008150,GO:0009889,GO:0009966,GO:0009987,GO:0010556,GO:0010590,GO:0010646,GO:0010675,GO:0010962,GO:0010981,GO:0015629,GO:0016043,GO:0017016,GO:0017048,GO:0019222,GO:0019899,GO:…	Dbl homology (DH) domain|Citron-like|Citron-like|Pleckstrin-like|Dbl homology (DH) domain|Dbl homology (DH) domain|GPCR, rhodopsin-like|Dbl homology (DH) domain		ko:K19842,ko:K19843	ko04011,map04011				ko00000,ko00001				NA
109531	1.12187	0.0218092	Function Unknown	NA	NA	NA	NA	NA	NA	NA	NA	NA	NA	NA	NA	NA	NA
109541	1.0058	0.0211127	Function Unknown			NA											NA
109696	1.67969	0.0250685	Lipid transport and metabolism	Acetyl-CoA carboxylase, central region	GO:0000166,GO:0001676,GO:0003674,GO:0003824,GO:0003989,GO:0004075,GO:0005488,GO:0005524,GO:0005575,GO:0005622,GO:0005623,GO:0005737,GO:0005739,GO:0005783,GO:0005789,GO:0005829,GO:0006082,GO:0006606,GO:0006629,GO:0006631,GO:0006633,GO:0006810,GO:0006886,GO:0006913,GO:0006996,GO:0006997,GO:0006998,GO:0008104,GO:0008144,GO:0008150,GO:0008152,GO:0008610,GO:0009058,GO:0009987,GO:0010256,GO:0012505,GO:…	Carbamoyl phosphate synthase, large subunit, N-terminal|Biotin/lipoyl attachment|Carboxyl transferase|Biotin carboxylase, C-terminal|Carbamoyl phosphate synthetase, large subunit, ATP-binding|Acetyl-CoA carboxylase, central region|Biotin/lipoyl attachment|ATP-grasp fold|Biotin carboxylation region|Acetyl-coenzyme A carboxyltransferase, N-terminal|Acetyl-coenzyme A carboxyltransferase, C-terminal|…	2.1.3.15,6.3.4.14,6.4.1.2	ko:K11262	ko00061,ko00254,ko00620,ko00640,ko01100,ko01110,ko01212,ko04152,ko04910,ko04922,map00061,map00254,map00620,map00640,map01100,map01110,map01212,map04152,map04910,map04922	M00082	R00742,R04385,R04386	RC00040,RC00253,RC00367	ko00000,ko00001,ko00002,ko01000				NA
109894	2.07233	0.0498226	Function Unknown	Duf1212 domain membrane protein	GO:0003333,GO:0003674,GO:0005215,GO:0005342,GO:0005575,GO:0005622,GO:0005623,GO:0005737,GO:0005783,GO:0006810,GO:0006811,GO:0006820,GO:0006865,GO:0008150,GO:0008509,GO:0008514,GO:0012505,GO:0015075,GO:0015171,GO:0015318,GO:0015711,GO:0015849,GO:0016020,GO:0016021,GO:0022857,GO:0031224,GO:0034220,GO:0043226,GO:0043227,GO:0043229,GO:0043231,GO:0044424,GO:0044425,GO:0044444,GO:0044464,GO:0046942,GO:…	Protein of unknown function DUF1212											NA
110151	3.05669	0.0406761	Secondary metabolites biosynthesis, transport and catabolism	KR domain	GO:0003674,GO:0003824,GO:0003857,GO:0006082,GO:0006629,GO:0006631,GO:0008150,GO:0008152,GO:0009987,GO:0016491,GO:0016614,GO:0016616,GO:0019752,GO:0032787,GO:0043436,GO:0044237,GO:0044238,GO:0044255,GO:0044281,GO:0055114,GO:0071704	Short-chain dehydrogenase/reductase SDR|Glucose/ribitol dehydrogenase|Short-chain dehydrogenase/reductase SDR|Short-chain dehydrogenase/reductase SDR|NAD(P)-binding											NA
110504	1.18047	0.0112544	Coenzyme transport and metabolism	Elongator protein 3, MiaB family, Radical SAM		Radical SAM|HemN, C-terminal|Elongator protein 3/MiaB/NifB|Putative oxygen-independent coproporphyrinogen III oxidase											NA
110991	1.00581	0.0329334	Secondary metabolites biosynthesis, transport and catabolism	Cytochrome P450		Cytochrome P450|Cytochrome P450, E-class, group I|Cytochrome P450|Cytochrome P450|Cytochrome P450											NA
111958	1.02899	0.0423163	Function Unknown			Cyclin-like F-box|Cyclin-like F-box|Cyclin-like F-box											NA
113027	1.74755	0.0167617	Function Unknown	NA	NA	Zinc finger, C2H2-type|Zinc finger, C2H2-type|Zinc finger, C2H2-type	NA	NA	NA	NA	NA	NA	NA	NA	NA	NA	NA
113466	1.27344	0.0363009	Posttranslational modification, protein turnover, chaperones	Xylanase inhibitor N-terminal		Peptidase A1|Peptidase A1|Peptidase aspartic, active site|Peptidase aspartic, catalytic											1
113723	1.16238	0.0229749	Function Unknown	MIZ/SP-RING zinc finger		Zinc finger, MIZ-type|Zinc finger, MIZ-type											NA
114454	2.55512	0.0116944	Posttranslational modification, protein turnover, chaperones	to Saccharomyces cerevisiae YBR014C and YDL010W	GO:0000322,GO:0000323,GO:0000324,GO:0003674,GO:0003824,GO:0004362,GO:0005488,GO:0005506,GO:0005515,GO:0005575,GO:0005622,GO:0005623,GO:0005737,GO:0005773,GO:0005783,GO:0005789,GO:0005794,GO:0005796,GO:0005801,GO:0006950,GO:0006979,GO:0008150,GO:0008152,GO:0009636,GO:0009987,GO:0012505,GO:0015036,GO:0015037,GO:0015038,GO:0016020,GO:0016021,GO:0016209,GO:0016491,GO:0016651,GO:0016667,GO:0016668,GO:…	Glutaredoxin subgroup|Glutaredoxin|Glutaredoxin, eukaryotic and viruses|Glutaredoxin active site|Thioredoxin-like fold		ko:K03676					ko00000,ko03110				NA
114540	1.72941	0.0382847	Posttranslational modification, protein turnover, chaperones	FtsH Extracellular	GO:0000166,GO:0001302,GO:0002181,GO:0003674,GO:0003824,GO:0005488,GO:0005524,GO:0005575,GO:0005622,GO:0005623,GO:0005737,GO:0005739,GO:0005740,GO:0005743,GO:0005745,GO:0006412,GO:0006465,GO:0006508,GO:0006518,GO:0006605,GO:0006626,GO:0006807,GO:0006810,GO:0006839,GO:0006886,GO:0006996,GO:0007005,GO:0007568,GO:0007569,GO:0008104,GO:0008144,GO:0008150,GO:0008152,GO:0008233,GO:0008237,GO:0009058,GO:…	AAA ATPase, core|Peptidase M41|Peptidase M41, FtsH extracellular|AAA+ ATPase, core|Peptidase M41, FtsH|AAA ATPase, conserved site		ko:K08956					ko00000,ko01000,ko01002,ko03110				NA
115033	1.46058	0.0201786	Function Unknown			NA											NA
115592	1.01094	0.0344433	Function Unknown			NA											NA
115687	1.47124	0.00835972	Function Unknown			NA											NA
115708	1.16083	0.0472149	Function Unknown			NA											NA
115786	1.51832	0.0280515	RNA processing and modification	2OG-Fe(II) oxygenase superfamily	GO:0000228,GO:0000785,GO:0000790,GO:0000791,GO:0003674,GO:0003824,GO:0005488,GO:0005506,GO:0005575,GO:0005622,GO:0005623,GO:0005634,GO:0005694,GO:0005719,GO:0005737,GO:0005739,GO:0006139,GO:0006259,GO:0006281,GO:0006304,GO:0006396,GO:0006399,GO:0006400,GO:0006725,GO:0006807,GO:0006950,GO:0006974,GO:0008033,GO:0008150,GO:0008152,GO:0008198,GO:0009451,GO:0009987,GO:0010467,GO:0016070,GO:0016491,GO:…	NA	3.5.1.4,4.2.99.18	ko:K01426,ko:K10765	ko00330,ko00360,ko00380,ko00627,ko00643,ko01120,map00330,map00360,map00380,map00627,map00643,map01120		R02540,R03096,R03180,R03909,R05551,R05590	RC00010,RC00100,RC00950,RC01025	ko00000,ko00001,ko01000				NA
117651	1.36671	0.0164415	Amino acid transport and metabolism|Translation, ribosomal structure and biogenesis	Mortierella verticillata NRRL 6337		ABC transporter-like|ABC transporter-like|AAA+ ATPase, core|ABC transporter-like|ABC transporter-like		ko:K06158					ko00000,ko03012				NA
117736	1.52545	0.0245663	Inorganic ion transport and metabolism	Sodium/hydrogen exchanger family	GO:0003674,GO:0005215,GO:0005451,GO:0005575,GO:0005622,GO:0005623,GO:0005628,GO:0005737,GO:0005783,GO:0005886,GO:0005887,GO:0006810,GO:0006811,GO:0006812,GO:0006813,GO:0006814,GO:0006873,GO:0006875,GO:0006883,GO:0006885,GO:0006950,GO:0006970,GO:0008150,GO:0008324,GO:0009628,GO:0009987,GO:0012505,GO:0015075,GO:0015077,GO:0015078,GO:0015081,GO:0015291,GO:0015297,GO:0015298,GO:0015299,GO:0015318,GO:…	Sodium/hydrogen exchanger		ko:K03316					ko00000	2.A.36			NA
117981	1.55664	0.0318708	Intracellular trafficking, secretion, and vesicular transport	Mortierella verticillata NRRL 6337	GO:0000041,GO:0003674,GO:0005215,GO:0005575,GO:0005623,GO:0005886,GO:0005887,GO:0006810,GO:0006811,GO:0006812,GO:0006820,GO:0006826,GO:0006873,GO:0006875,GO:0006879,GO:0006950,GO:0007154,GO:0008150,GO:0008509,GO:0008514,GO:0009267,GO:0009605,GO:0009987,GO:0009991,GO:0010106,GO:0015075,GO:0015318,GO:0015343,GO:0015688,GO:0015711,GO:0015850,GO:0015891,GO:0016020,GO:0016021,GO:0019725,GO:0022857,GO:…	Major facilitator superfamily MFS-1|Major facilitator superfamily|MFS general substrate transporter											0.913
121605	3.40095	0.0428943	Function Unknown	A Receptor for Ubiquitination Targets		WD40 repeat|WD40 repeat|WD40 repeat|WD40 repeat|WD40 repeat|WD40 repeat|WD40 repeat|WD40 repeat-like		ko:K03362	ko04114,ko04120,ko04218,ko04310,ko04340,ko04341,ko04390,ko04624,ko04710,ko05131,map04114,map04120,map04218,map04310,map04340,map04341,map04390,map04624,map04710,map05131	M00380			ko00000,ko00001,ko00002,ko03036,ko04121				NA
136013	1.27565	0.0162447	Posttranslational modification, protein turnover, chaperones|Inorganic ion transport and metabolism|Intracellular trafficking, secretion, and vesicular transport	Domain of unknown function (DUF202)	GO:0000322,GO:0000323,GO:0000324,GO:0000329,GO:0005575,GO:0005622,GO:0005623,GO:0005737,GO:0005773,GO:0005774,GO:0005783,GO:0005794,GO:0005886,GO:0006082,GO:0006793,GO:0006797,GO:0006810,GO:0006914,GO:0006996,GO:0007033,GO:0007034,GO:0008104,GO:0008150,GO:0008152,GO:0009056,GO:0009987,GO:0012505,GO:0016020,GO:0016021,GO:0016043,GO:0016237,GO:0031090,GO:0031224,GO:0032991,GO:0033036,GO:0033254,GO:…	SPX, N-terminal											NA
136103	1.82255	0.0403215	Energy production and conversion	Aldo/keto reductase family		Aldo/keto reductase|Aldo/keto reductase|Aldo/keto reductase|Aldo/keto reductase											NA
136835	1.02097	0.044886	Inorganic ion transport and metabolism	Cation transporter/ATPase, N-terminus		ATPase, P-type, K/Mg/Cd/Cu/Zn/Na/Ca/Na/H-transporter|E1-E2 ATPase-associated region|ATPase, P-type cation-transporter, C-terminal|ATPase, P-type cation-transporter, N-terminal|Haloacid dehalogenase-like hydrolase|ATPase, P-type, K/Mg/Cd/Cu/Zn/Na/Ca/Na/H-transporter|ATPase, P-type, K/Mg/Cd/Cu/Zn/Na/Ca/Na/H-transporter											NA
137463	1.57811	0.0344433	Inorganic ion transport and metabolism	Mortierella verticillata NRRL 6337		General substrate transporter|Major facilitator superfamily|Pyridoxal phosphate-dependent decarboxylase|MFS general substrate transporter											NA
141423	1.45777	0.0323274	Chromatin structure and dynamics	RNA binding activity-knot of a chromodomain	GO:0000123,GO:0000183,GO:0000228,GO:0000775,GO:0000785,GO:0000790,GO:0000792,GO:0001207,GO:0001672,GO:0003674,GO:0003824,GO:0004402,GO:0005575,GO:0005622,GO:0005623,GO:0005634,GO:0005654,GO:0005694,GO:0005720,GO:0005721,GO:0006139,GO:0006259,GO:0006260,GO:0006261,GO:0006275,GO:0006281,GO:0006302,GO:0006325,GO:0006342,GO:0006351,GO:0006354,GO:0006355,GO:0006357,GO:0006464,GO:0006473,GO:0006475,GO:…	MOZ/SAS-like protein|Acyl-CoA N-acyltransferase	2.3.1.48	ko:K11304	ko05166,map05166				ko00000,ko00001,ko01000,ko03036				NA
141666	1.04714	0.023992	Function Unknown	Domain of unknown function DUF21	GO:0000322,GO:0000323,GO:0000324,GO:0000329,GO:0005575,GO:0005622,GO:0005623,GO:0005737,GO:0005773,GO:0005774,GO:0005783,GO:0006873,GO:0006875,GO:0006996,GO:0007005,GO:0008150,GO:0009987,GO:0012505,GO:0016020,GO:0016021,GO:0016043,GO:0019725,GO:0030003,GO:0030026,GO:0031090,GO:0031224,GO:0042592,GO:0043226,GO:0043227,GO:0043229,GO:0043231,GO:0044422,GO:0044424,GO:0044425,GO:0044437,GO:0044444,GO:…	Cystathionine beta-synthase, core|Protein of unknown function DUF21		ko:K16302					ko00000,ko02000	9.A.40.3			NA
143091	1.14479	0.0416452	Function Unknown	Yeast mitochondrial distribution and morphology (MDM) proteins	GO:0000001,GO:0005575,GO:0005622,GO:0005623,GO:0005634,GO:0005737,GO:0005739,GO:0005740,GO:0005743,GO:0006873,GO:0006996,GO:0007005,GO:0008150,GO:0009987,GO:0016020,GO:0016043,GO:0019216,GO:0019220,GO:0019222,GO:0019725,GO:0019866,GO:0031090,GO:0031323,GO:0031966,GO:0031967,GO:0031975,GO:0042592,GO:0043226,GO:0043227,GO:0043229,GO:0043231,GO:0044422,GO:0044424,GO:0044429,GO:0044444,GO:0044446,GO:…	Mitochondrial distribution and morphology protein family 31/32, fungi		ko:K17979					ko00000,ko03029				NA
144949	1.28374	0.028338	Function Unknown	Repeated motif present between transmembrane helices in cystinosin, yeast ERS1p, mannose-P-dolichol utilization defect 1, and other hypothetical proteins.	GO:0000322,GO:0000323,GO:0000324,GO:0000329,GO:0003333,GO:0003674,GO:0005215,GO:0005342,GO:0005575,GO:0005622,GO:0005623,GO:0005737,GO:0005739,GO:0005773,GO:0005774,GO:0005783,GO:0006810,GO:0006811,GO:0006820,GO:0006865,GO:0007034,GO:0008150,GO:0008509,GO:0008514,GO:0012505,GO:0015075,GO:0015171,GO:0015174,GO:0015318,GO:0015711,GO:0015802,GO:0015849,GO:0016020,GO:0016021,GO:0022857,GO:0031090,GO:…	Cystinosin/ERS1p repeat|Cystinosin/ERS1p repeat|ABC transporter-like											NA
145224	2.30361	0.0105011	Secondary metabolites biosynthesis, transport and catabolism	Belongs to the short-chain dehydrogenases reductases (SDR) family	GO:0003674,GO:0003824,GO:0008150,GO:0008152,GO:0016491,GO:0055114	Short-chain dehydrogenase/reductase SDR|Glucose/ribitol dehydrogenase|Short-chain dehydrogenase/reductase SDR|Short-chain dehydrogenase/reductase SDR|NAD(P)-binding											NA
145801	1.10132	0.0211804	Signal transduction mechanisms	Protein tyrosine kinase	GO:0000122,GO:0000166,GO:0003674,GO:0003824,GO:0004672,GO:0004674,GO:0005488,GO:0005524,GO:0005575,GO:0005622,GO:0005623,GO:0005634,GO:0005737,GO:0006355,GO:0006357,GO:0006464,GO:0006468,GO:0006793,GO:0006796,GO:0006807,GO:0006808,GO:0006873,GO:0007154,GO:0007165,GO:0008144,GO:0008150,GO:0008152,GO:0009889,GO:0009890,GO:0009892,GO:0009987,GO:0010468,GO:0010556,GO:0010558,GO:0010605,GO:0010629,GO:…	Protein kinase, core|Serine/threonine protein kinase-related|Tyrosine protein kinase|Serine/threonine protein kinase|Protein kinase, core|Protein kinase ATP binding, conserved site|Serine/threonine protein kinase, active site|Protein kinase-like											NA
145983	1.34838	0.0291117	Carbohydrate transport and metabolism	Catalyzes the rate-limiting step of the oxidative pentose-phosphate pathway, which represents a route for the dissimilation of carbohydrates besides glycolysis	GO:0000166,GO:0000302,GO:0002262,GO:0002376,GO:0002520,GO:0003674,GO:0003824,GO:0004345,GO:0005488,GO:0005515,GO:0005536,GO:0005575,GO:0005622,GO:0005623,GO:0005737,GO:0005829,GO:0005886,GO:0005975,GO:0005996,GO:0006066,GO:0006081,GO:0006091,GO:0006098,GO:0006139,GO:0006518,GO:0006575,GO:0006629,GO:0006694,GO:0006695,GO:0006725,GO:0006732,GO:0006733,GO:0006739,GO:0006740,GO:0006749,GO:0006753,GO:…	Glucose-6-phosphate dehydrogenase|Glucose-6-phosphate dehydrogenase|Glucose-6-phosphate dehydrogenase|Glucose-6-phosphate dehydrogenase|Glucose-6-phosphate dehydrogenase|Glucose-6-phosphate dehydrogenase|Glucose-6-phosphate dehydrogenase|NAD(P)-binding	1.1.1.363,1.1.1.49	ko:K00036	ko00030,ko00480,ko01100,ko01110,ko01120,ko01130,ko01200,ko05230,map00030,map00480,map01100,map01110,map01120,map01130,map01200,map05230	M00004,M00006,M00008	R00835,R02736,R10907	RC00001,RC00066	ko00000,ko00001,ko00002,ko01000,ko04147				NA
148410	1.23721	0.04476	Function Unknown	Protein of unknown function (DUF1264)		Protein of unknown function DUF1264											NA
148482	2.40513	0.014447	Amino acid transport and metabolism	Amino acid transporter	GO:0000322,GO:0000323,GO:0000324,GO:0000329,GO:0003333,GO:0003674,GO:0005215,GO:0005302,GO:0005342,GO:0005575,GO:0005622,GO:0005623,GO:0005737,GO:0005773,GO:0005774,GO:0006810,GO:0006811,GO:0006812,GO:0006820,GO:0006855,GO:0006865,GO:0006868,GO:0007034,GO:0008150,GO:0008324,GO:0008509,GO:0008514,GO:0015075,GO:0015171,GO:0015173,GO:0015175,GO:0015179,GO:0015186,GO:0015188,GO:0015238,GO:0015318,GO:…	Amino acid transporter, transmembrane		ko:K15015	ko04721,ko04723,ko04727,ko05032,ko05033,map04721,map04723,map04727,map05032,map05033				ko00000,ko00001,ko02000	2.A.18.5		iMM904.YJR001W	NA
149114	1.15697	0.00905257	Replication, recombination and repair	DUF1771	GO:0003674,GO:0005488,GO:0005515,GO:0032182,GO:0043130	Smr protein/MutS2 C-terminal|Smr protein/MutS2 C-terminal|Smr protein/MutS2 C-terminal											NA
151626	1.71107	0.00835972	Inorganic ion transport and metabolism	Mortierella verticillata NRRL 6337	GO:0001406,GO:0001407,GO:0003674,GO:0005215,GO:0005575,GO:0005623,GO:0005886,GO:0005887,GO:0006810,GO:0006811,GO:0006820,GO:0008150,GO:0008509,GO:0008514,GO:0015075,GO:0015605,GO:0015711,GO:0015748,GO:0016020,GO:0016021,GO:0022857,GO:0031224,GO:0031226,GO:0034220,GO:0044425,GO:0044459,GO:0044464,GO:0051179,GO:0051234,GO:0055085,GO:0071702,GO:0071944,GO:0098656	General substrate transporter|Major facilitator superfamily|Sugar transporter, conserved site|MFS general substrate transporter											NA
152044	1.21081	0.00880422	Inorganic ion transport and metabolism	Ammonium Transporter Family	GO:0001403,GO:0003674,GO:0005215,GO:0005275,GO:0005575,GO:0005622,GO:0005623,GO:0005737,GO:0005783,GO:0005886,GO:0005887,GO:0006810,GO:0006811,GO:0006812,GO:0007124,GO:0008150,GO:0008324,GO:0008519,GO:0009987,GO:0012505,GO:0015075,GO:0015101,GO:0015200,GO:0015291,GO:0015398,GO:0015695,GO:0015696,GO:0015837,GO:0015843,GO:0016020,GO:0016021,GO:0016049,GO:0019740,GO:0019755,GO:0022804,GO:0022857,GO:…	Rh-like protein/ammonium transporter|Ammonium transporter|Ammonium transporter|Rh-like protein/ammonium transporter		ko:K03320					ko00000,ko02000	1.A.11		iMM904.YPR138C,iND750.YPR138C	NA
152775	1.3588	0.00751473	Energy production and conversion	FAD linked oxidases, C-terminal domain	GO:0003674,GO:0003824,GO:0004457,GO:0004458,GO:0005575,GO:0005622,GO:0005623,GO:0005737,GO:0005739,GO:0005740,GO:0005743,GO:0005759,GO:0006082,GO:0006089,GO:0008150,GO:0008152,GO:0009056,GO:0009987,GO:0016020,GO:0016054,GO:0016491,GO:0016614,GO:0016898,GO:0019752,GO:0019866,GO:0031090,GO:0031966,GO:0031967,GO:0031974,GO:0031975,GO:0032787,GO:0043226,GO:0043227,GO:0043229,GO:0043231,GO:0043233,GO:…	FAD linked oxidase, N-terminal|FAD-linked oxidase, C-terminal|FAD-linked oxidase-like, C-terminal|FAD-binding, type 2	1.1.2.4	ko:K00102	ko00620,map00620		R00197	RC00044	ko00000,ko00001,ko01000			iMM904.YDL174C,iND750.YDL174C	NA
152855	3.30642	0.0196438	Secondary metabolites biosynthesis, transport and catabolism	Alcohol dehydrogenase GroES-like domain	GO:0006950,GO:0008150,GO:0009636,GO:0009987,GO:0033554,GO:0042221,GO:0050896,GO:0051409,GO:0051410,GO:0051716,GO:0070458,GO:0070887,GO:0071500,GO:0097237,GO:0098754,GO:1901698,GO:1990748	Alcohol dehydrogenase, zinc-binding|Alcohol dehydrogenase GroES-like|Alcohol dehydrogenase, zinc-containing, conserved site|GroES-like|NAD(P)-binding											NA
153445	1.11682	0.0258298	Function Unknown	Yeast mitochondrial distribution and morphology (MDM) proteins	GO:0000001,GO:0005575,GO:0005622,GO:0005623,GO:0005634,GO:0005737,GO:0005739,GO:0005740,GO:0005743,GO:0006873,GO:0006996,GO:0007005,GO:0008150,GO:0009987,GO:0016020,GO:0016043,GO:0019216,GO:0019220,GO:0019222,GO:0019725,GO:0019866,GO:0031090,GO:0031323,GO:0031966,GO:0031967,GO:0031975,GO:0042592,GO:0043226,GO:0043227,GO:0043229,GO:0043231,GO:0044422,GO:0044424,GO:0044429,GO:0044444,GO:0044446,GO:…	Mitochondrial distribution and morphology protein family 31/32, fungi		ko:K17979					ko00000,ko03029				NA
154017	1.02813	0.0209868	Amino acid transport and metabolism	NAT, N-acetyltransferase, of N-acetylglutamate synthase	GO:0003674,GO:0003824,GO:0004042,GO:0005488,GO:0005575,GO:0005622,GO:0005623,GO:0005737,GO:0005739,GO:0005759,GO:0006082,GO:0006520,GO:0006525,GO:0006526,GO:0006536,GO:0006591,GO:0006592,GO:0006807,GO:0008080,GO:0008150,GO:0008152,GO:0008652,GO:0009058,GO:0009064,GO:0009084,GO:0009987,GO:0016053,GO:0016407,GO:0016410,GO:0016597,GO:0016740,GO:0016746,GO:0016747,GO:0019752,GO:0031406,GO:0031974,GO:…	Protein of unknown function DUF619	2.3.1.1	ko:K00618	ko00220,ko01100,ko01110,ko01130,ko01210,ko01230,map00220,map01100,map01110,map01130,map01210,map01230	M00028	R00259	RC00004,RC00064	ko00000,ko00001,ko00002,ko01000				NA
154703	3.54874	0.00835972	Function Unknown	NA	NA	NA	NA	NA	NA	NA	NA	NA	NA	NA	NA	NA	NA
154888	2.31498	0.0217234	Function Unknown	helix-loop-helix DNA-binding domain-containing protein		Basic helix-loop-helix dimerisation region bHLH|Basic helix-loop-helix dimerisation region bHLH|Basic helix-loop-helix dimerisation region bHLH|Helix-loop-helix DNA-binding											NA
154971	1.0065	0.0080245	Translation, ribosomal structure and biogenesis	Ribosomal protein S5, C-terminal domain	GO:0002181,GO:0003674,GO:0003676,GO:0003723,GO:0003735,GO:0005198,GO:0005488,GO:0005575,GO:0005622,GO:0005623,GO:0005737,GO:0005829,GO:0005840,GO:0006403,GO:0006405,GO:0006407,GO:0006412,GO:0006417,GO:0006450,GO:0006518,GO:0006611,GO:0006807,GO:0006810,GO:0006886,GO:0006913,GO:0008104,GO:0008150,GO:0008152,GO:0009058,GO:0009059,GO:0009889,GO:0009891,GO:0009893,GO:0009987,GO:0010467,GO:0010468,GO:…	Ribosomal protein S5, N-terminal|Ribosomal protein S5, C-terminal|Ribosomal protein S5, eukaryotic/archaeal|Ribosomal protein S5, N-terminal|Ribosomal protein S5, N-terminal		ko:K02981	ko03010,map03010	M00177			br01610,ko00000,ko00001,ko00002,ko03011				NA
154994	1.14539	0.00751473	Translation, ribosomal structure and biogenesis	Ribosomal protein L1p/L10e family	GO:0000470,GO:0002181,GO:0003674,GO:0003676,GO:0003723,GO:0003735,GO:0005198,GO:0005488,GO:0005575,GO:0005622,GO:0005623,GO:0005737,GO:0005829,GO:0005840,GO:0006139,GO:0006364,GO:0006396,GO:0006412,GO:0006518,GO:0006725,GO:0006807,GO:0008150,GO:0008152,GO:0009058,GO:0009059,GO:0009987,GO:0010467,GO:0015934,GO:0016070,GO:0016072,GO:0019538,GO:0022613,GO:0022625,GO:0022626,GO:0030684,GO:0030687,GO:…	Ribosomal protein L1|Ribosomal protein L1|Ribosomal protein L1|Ribosomal protein L1|Ribosomal protein L1		ko:K02865	ko03010,map03010	M00177			br01610,ko00000,ko00001,ko00002,ko03011				NA
155128	1.85847	0.0484844	Function Unknown	FR47-like protein		GCN5-related N-acetyltransferase|GCN5-related N-acetyltransferase|Basic-leucine zipper (bZIP) transcription factor|Acyl-CoA N-acyltransferase											NA
155435	1.37303	0.0259087	Function Unknown	SUR7/PalI family		NA											0.006
155528	1.23332	0.019462	Amino acid transport and metabolism	Beta-eliminating lyase	GO:0001505,GO:0003674,GO:0003824,GO:0004793,GO:0005575,GO:0005622,GO:0005623,GO:0005737,GO:0005829,GO:0006082,GO:0006520,GO:0006544,GO:0006545,GO:0006566,GO:0006567,GO:0006807,GO:0008150,GO:0008152,GO:0008652,GO:0008732,GO:0009056,GO:0009058,GO:0009063,GO:0009066,GO:0009068,GO:0009069,GO:0009070,GO:0009987,GO:0016053,GO:0016054,GO:0016829,GO:0016830,GO:0016832,GO:0017144,GO:0019752,GO:0042133,GO:…	Aromatic amino acid beta-eliminating lyase/threonine aldolase|Pyridoxal phosphate-dependent transferase, major region	4.1.2.48	ko:K01620	ko00260,ko01100,ko01110,ko01120,ko01130,ko01230,map00260,map01100,map01110,map01120,map01130,map01230		R00751,R06171	RC00312,RC00372	ko00000,ko00001,ko01000			iMM904.YEL046C,iND750.YEL046C	NA
155717	1.11052	0.00905257	Function Unknown			NA											NA
155831	1.43404	0.0223239	Lipid transport and metabolism	Alpha/beta hydrolase family		Alpha/beta hydrolase|Epoxide hydrolase-like|Alpha/beta hydrolase fold-1	3.1.3.76,3.3.2.10	ko:K08726	ko00590,ko00625,ko01100,ko01120,ko04146,map00590,map00625,map01100,map01120,map04146		R05842,R07108,R07109,R07110,R07111	RC01477,RC01757	ko00000,ko00001,ko01000,ko01002,ko01009				NA
156168	1.10035	0.0270197	Function Unknown			NA											NA
156212	1.12367	0.0146135	Transcription	helix loop helix domain		Basic helix-loop-helix dimerisation region bHLH|Basic helix-loop-helix dimerisation region bHLH|Basic helix-loop-helix dimerisation region bHLH|Helix-loop-helix DNA-binding											NA
156290	1.03456	0.0492818	Function Unknown	Ser-Thr-rich glycosyl-phosphatidyl-inositol-anchored membrane family		NA											1
156343	1.53426	0.00698271	Amino acid transport and metabolism|Translation, ribosomal structure and biogenesis	Mortierella verticillata NRRL 6337	GO:0000166,GO:0002181,GO:0002182,GO:0003674,GO:0003676,GO:0003723,GO:0003746,GO:0003824,GO:0003924,GO:0005488,GO:0005524,GO:0005575,GO:0005618,GO:0005622,GO:0005623,GO:0005737,GO:0005829,GO:0005840,GO:0005886,GO:0006412,GO:0006414,GO:0006415,GO:0006518,GO:0006807,GO:0008135,GO:0008144,GO:0008150,GO:0008152,GO:0009058,GO:0009059,GO:0009277,GO:0009986,GO:0009987,GO:0010467,GO:0010494,GO:0016020,GO:…	ABC transporter-like|ABC transporter-like|ABC transporter-like		ko:K03235					ko00000,ko03012				NA
156359	1.08008	0.0292335	Amino acid transport and metabolism	Catalytic LigB subunit of aromatic ring-opening dioxygenase		Extradiol ring-cleavage dioxygenase, class III enzyme, subunit B|Extradiol aromatic ring-opening dioxygenase, DODA type|Extradiol ring-cleavage dioxygenase, class III enzyme, subunit B		ko:K15777	ko00965,map00965		R08836	RC00387	ko00000,ko00001,ko01000				NA
156377	2.01028	0.0139626	Function Unknown	Zinc finger, C2H2 type	GO:0000228,GO:0000429,GO:0000436,GO:0000785,GO:0000790,GO:0000981,GO:0003674,GO:0003676,GO:0003677,GO:0003700,GO:0005488,GO:0005575,GO:0005622,GO:0005623,GO:0005634,GO:0005694,GO:0005737,GO:0005829,GO:0006355,GO:0006357,GO:0006950,GO:0006970,GO:0007154,GO:0007155,GO:0007584,GO:0008150,GO:0009605,GO:0009607,GO:0009628,GO:0009651,GO:0009889,GO:0009891,GO:0009893,GO:0009987,GO:0009991,GO:0010468,GO:…	Zinc finger, C2H2-type|Zinc finger, C2H2-like|Zinc finger, C2H2-type|Zinc finger, C2H2-type		ko:K21544					ko00000,ko03000				NA
157017	1.41961	0.0489242	Function Unknown			NA											NA
157047	1.48691	0.0403215	Function Unknown	Putative Phosphatase		HAD-superfamily hydrolase, subfamily IB, hypothetical 1|HAD-superfamily hydrolase, subfamily IB, PSPase-like|HAD-superfamily hydrolase, subfamily IB, hypothetical 1	3.1.3.74	ko:K13248	ko00750,ko01100,map00750,map01100		R00173,R01911,R02494	RC00017	ko00000,ko00001,ko01000,ko01009				NA
157256	1.36842	0.0291117	Chromatin structure and dynamics	Chromatin organization modifier domain	GO:0000166,GO:0003674,GO:0003676,GO:0003723,GO:0003729,GO:0003824,GO:0005488,GO:0005524,GO:0005575,GO:0005622,GO:0005623,GO:0005737,GO:0005739,GO:0005844,GO:0006403,GO:0006405,GO:0006406,GO:0006611,GO:0006810,GO:0006886,GO:0006913,GO:0008104,GO:0008144,GO:0008150,GO:0008152,GO:0010467,GO:0015031,GO:0015833,GO:0015931,GO:0016462,GO:0016787,GO:0016817,GO:0016818,GO:0016887,GO:0016973,GO:0017076,GO:…	ABC transporter-like|ABC transporter-like|Chromo domain|Chromo domain|AAA+ ATPase, core|Chromo domain|ABC transporter-like|ABC transporter-like|Chromo domain-like		ko:K03235					ko00000,ko03012				NA
157439	1.76998	0.028338	Secondary metabolites biosynthesis, transport and catabolism	alcohol dehydrogenase		Alcohol dehydrogenase, zinc-binding|Alcohol dehydrogenase GroES-like|Alcohol dehydrogenase, zinc-containing, conserved site|GroES-like|NAD(P)-binding											NA
157442	1.06673	0.0472149	Function Unknown			NA											NA
157449	1.28279	0.044886	Function Unknown			NA											NA
159240	1.59001	0.0133471	Inorganic ion transport and metabolism	Sugar (and other) transporter	GO:0000322,GO:0000323,GO:0000324,GO:0000329,GO:0005575,GO:0005622,GO:0005623,GO:0005737,GO:0005773,GO:0005774,GO:0006810,GO:0008150,GO:0016020,GO:0016021,GO:0031090,GO:0031224,GO:0043226,GO:0043227,GO:0043229,GO:0043231,GO:0044422,GO:0044424,GO:0044425,GO:0044437,GO:0044444,GO:0044446,GO:0044464,GO:0051179,GO:0051234,GO:0055085,GO:0098588,GO:0098805,GO:0098852	Sugar transporter|General substrate transporter|Sugar transporter|Major facilitator superfamily|Sugar transporter, conserved site|Sugar transporter, conserved site|MFS general substrate transporter											0.914
159747	3.486	0.014447	Function Unknown	NA	NA	NA	NA	NA	NA	NA	NA	NA	NA	NA	NA	NA	1
159856	1.10806	0.00974224	Function Unknown	ACT domain		Uncharacterised conserved protein UCP008459											NA
160045	2.01945	0.0167617	Transcription	YEATS family	GO:0000123,GO:0000228,GO:0000428,GO:0000785,GO:0000790,GO:0000988,GO:0000990,GO:0000991,GO:0001109,GO:0001111,GO:0001173,GO:0001174,GO:0003674,GO:0005488,GO:0005515,GO:0005575,GO:0005622,GO:0005623,GO:0005634,GO:0005654,GO:0005667,GO:0005669,GO:0005674,GO:0005694,GO:0006139,GO:0006325,GO:0006338,GO:0006351,GO:0006352,GO:0006354,GO:0006355,GO:0006357,GO:0006366,GO:0006367,GO:0006368,GO:0006464,GO:…	YEATS|YEATS		ko:K03140,ko:K15306	ko03022,ko05166,ko05203,map03022,map05166,map05203				ko00000,ko00001,ko03021,ko03036				NA
160463	2.75231	0.0344433	Function Unknown			NA											NA
161753	2.22163	0.0168041	Function Unknown	NA	NA	NA	NA	NA	NA	NA	NA	NA	NA	NA	NA	NA	NA
163333	3.42091	0.0156549	Function Unknown			Pleckstrin-like|Pleckstrin-like|Pleckstrin-like											NA
163852	1.22743	0.0344433	Function Unknown	CotH kinase protein		Spore coat protein CotH											1
165136	2.42264	0.00698271	Transcription|Replication, recombination and repair	von Willebrand factor type A domain	GO:0000109,GO:0000112,GO:0000428,GO:0000439,GO:0000988,GO:0000990,GO:0000991,GO:0003674,GO:0003676,GO:0003824,GO:0004842,GO:0005488,GO:0005575,GO:0005622,GO:0005623,GO:0005634,GO:0005654,GO:0005667,GO:0005675,GO:0006139,GO:0006259,GO:0006281,GO:0006289,GO:0006351,GO:0006352,GO:0006355,GO:0006357,GO:0006366,GO:0006367,GO:0006464,GO:0006468,GO:0006725,GO:0006793,GO:0006796,GO:0006807,GO:0006950,GO:…	NA		ko:K03142	ko03022,ko03420,ko05203,map03022,map03420,map05203	M00290			ko00000,ko00001,ko00002,ko03021,ko03400				NA
165306	1.26759	0.0415493	Inorganic ion transport and metabolism	Sugar (and other) transporter		Sugar transporter|General substrate transporter|Sugar transporter|Major facilitator superfamily|Sugar transporter, conserved site|MFS general substrate transporter	1.8.1.4	ko:K00382	ko00010,ko00020,ko00260,ko00280,ko00620,ko00630,ko00640,ko01100,ko01110,ko01120,ko01130,ko01200,map00010,map00020,map00260,map00280,map00620,map00630,map00640,map01100,map01110,map01120,map01130,map01200	M00009,M00011,M00036,M00307,M00532	R00209,R01221,R01698,R03815,R07618,R08549	RC00004,RC00022,RC00583,RC02742,RC02833,RC02834	br01601,ko00000,ko00001,ko00002,ko01000,ko04147				NA
165310	1.36479	0.0468656	Function Unknown	NA	NA	NA	NA	NA	NA	NA	NA	NA	NA	NA	NA	NA	NA
165312	1.36601	0.0291117	Function Unknown	Ser-Thr-rich glycosyl-phosphatidyl-inositol-anchored membrane family		NA											1
166553	2.44655	0.0141533	Intracellular trafficking, secretion, and vesicular transport	Protein kinase C conserved region 2 (CalB)	GO:0003674,GO:0005488,GO:0005543,GO:0005575,GO:0005622,GO:0005623,GO:0005737,GO:0005783,GO:0005886,GO:0005938,GO:0008150,GO:0008289,GO:0009987,GO:0012505,GO:0016020,GO:0022406,GO:0031984,GO:0032541,GO:0043167,GO:0043168,GO:0043226,GO:0043227,GO:0043229,GO:0043231,GO:0044422,GO:0044424,GO:0044432,GO:0044444,GO:0044446,GO:0044448,GO:0044464,GO:0051179,GO:0051640,GO:0051641,GO:0051643,GO:0061817,GO:…	C2 calcium-dependent membrane targeting|C2 calcium-dependent membrane targeting|C2 calcium-dependent membrane targeting|C2 calcium/lipid-binding region, CaLB											0.912
166554	3.27391	0.0451687	Function Unknown	NA	NA	NA	NA	NA	NA	NA	NA	NA	NA	NA	NA	NA	NA
174063	1.18962	0.00695195	Translation, ribosomal structure and biogenesis	Ribosomal protein S8e	GO:0000460,GO:0000463,GO:0000466,GO:0000470,GO:0005575,GO:0005622,GO:0005623,GO:0005634,GO:0005730,GO:0006139,GO:0006364,GO:0006396,GO:0006725,GO:0006807,GO:0008150,GO:0008152,GO:0009987,GO:0010467,GO:0016070,GO:0016072,GO:0022613,GO:0030684,GO:0030687,GO:0031974,GO:0031981,GO:0032991,GO:0034470,GO:0034641,GO:0034660,GO:0042254,GO:0042273,GO:0043170,GO:0043226,GO:0043227,GO:0043228,GO:0043229,GO:…	Ribosomal protein S8e|Ribosomal protein S8e		ko:K14842					ko00000,ko03009				NA
182326	1.34949	0.00958189	Function Unknown	Protein required for hyphal anastomosis	GO:0000075,GO:0000077,GO:0000138,GO:0000278,GO:0000320,GO:0000321,GO:0000749,GO:0000754,GO:0000910,GO:0005575,GO:0005622,GO:0005623,GO:0005634,GO:0005635,GO:0005737,GO:0005783,GO:0005794,GO:0005795,GO:0005815,GO:0005816,GO:0005829,GO:0005856,GO:0006950,GO:0006974,GO:0007049,GO:0007088,GO:0007093,GO:0007096,GO:0007346,GO:0008104,GO:0008150,GO:0009893,GO:0009894,GO:0009896,GO:0009966,GO:0009968,GO:…	Armadillo-type fold											NA
182772	1.15152	0.0310357	Secondary metabolites biosynthesis, transport and catabolism	Methionine biosynthesis protein MetW		Methyltransferase type 12											NA
183142	2.01616	0.00905257	Function Unknown			NA											NA
186155	2.02163	0.00835972	Function Unknown	Polysaccharide deacetylase		Polysaccharide deacetylase|Glycoside hydrolase/deacetylase, beta/alpha-barrel											1
187985	1.27472	0.0209868	Posttranslational modification, protein turnover, chaperones	DnaJ molecular chaperone homology domain		Heat shock protein DnaJ|Heat shock protein DnaJ, N-terminal|Heat shock protein DnaJ, N-terminal|Heat shock protein DnaJ, N-terminal|Heat shock protein DnaJ, N-terminal|Heat shock protein DnaJ, N-terminal											NA
188136	1.59005	0.0284257	Function Unknown	Tetratricopeptide repeats		Tetratricopeptide TPR-1|Tetratricopeptide TPR2|Tetratricopeptide region|Tetratricopeptide region|Tetratricopeptide region		ko:K13342	ko04146,map04146				ko00000,ko00001,ko04131	3.A.20.1			NA
189480	1.27533	0.0383309	RNA processing and modification	RNA recognition motif		RNA recognition motif, RNP-1|RNA recognition motif, RNP-1|RNA recognition motif, RNP-1											NA
190864	2.12807	0.0161008	Function Unknown	NA	NA	NA	NA	NA	NA	NA	NA	NA	NA	NA	NA	NA	NA
21116	1.76792	0.0141533	Function Unknown	Major Facilitator Superfamily		Major facilitator superfamily MFS-1|Major facilitator superfamily|MFS general substrate transporter											NA
33890	1.17185	0.0196691	Lipid transport and metabolism	Hydroxymethylglutaryl-coenzyme A reductase	GO:0000502,GO:0003674,GO:0003824,GO:0004420,GO:0005575,GO:0005622,GO:0005623,GO:0005634,GO:0005635,GO:0005737,GO:0005777,GO:0005778,GO:0005783,GO:0005789,GO:0006066,GO:0006084,GO:0006139,GO:0006163,GO:0006629,GO:0006637,GO:0006644,GO:0006694,GO:0006696,GO:0006720,GO:0006721,GO:0006725,GO:0006732,GO:0006753,GO:0006790,GO:0006793,GO:0006796,GO:0006807,GO:0008150,GO:0008152,GO:0008202,GO:0008204,GO:…	NA	1.1.1.34	ko:K00021	ko00900,ko01100,ko01110,ko01130,ko04152,ko04976,map00900,map01100,map01110,map01130,map04152,map04976	M00095	R02082	RC00004,RC00644	ko00000,ko00001,ko00002,ko01000			iMM904.YML075C,iND750.YML075C	NA
34313	3.60592	0.00698271	Signal transduction mechanisms	Camk camkl pask protein kinase		Protein kinase, core|Serine/threonine protein kinase-related|Tyrosine protein kinase|Serine/threonine protein kinase|Protein kinase, core|Protein kinase ATP binding, conserved site|Serine/threonine protein kinase, active site|Protein kinase-like	2.7.11.1	ko:K08801					ko00000,ko01000,ko01001				NA
40924	1.53413	0.0196438	Signal transduction mechanisms	Serine-threonine protein phosphatase N-terminal domain	GO:0000322,GO:0000323,GO:0000324,GO:0003674,GO:0003824,GO:0004721,GO:0004722,GO:0005575,GO:0005622,GO:0005623,GO:0005634,GO:0005737,GO:0005773,GO:0005886,GO:0006464,GO:0006470,GO:0006793,GO:0006796,GO:0006807,GO:0006873,GO:0006875,GO:0006883,GO:0007154,GO:0007165,GO:0008104,GO:0008150,GO:0008152,GO:0009987,GO:0016020,GO:0016311,GO:0016787,GO:0016788,GO:0016791,GO:0019538,GO:0019725,GO:0019897,GO:…	Serine/threonine-specific protein phosphatase and bis(5-nucleosyl)-tetraphosphatase|Serine/threonine-specific protein phosphatase and bis(5-nucleosyl)-tetraphosphatase|Metallophosphoesterase|Serine/threonine-specific protein phosphatase and bis(5-nucleosyl)-tetraphosphatase|Serine/threonine-specific protein phosphatase and bis(5-nucleosyl)-tetraphosphatase	3.1.3.16	ko:K06269	ko03015,ko04022,ko04024,ko04113,ko04114,ko04218,ko04261,ko04270,ko04390,ko04510,ko04611,ko04720,ko04728,ko04750,ko04810,ko04910,ko04921,ko04931,ko05031,ko05034,ko05168,ko05205,map03015,map04022,map04024,map04113,map04114,map04218,map04261,map04270,map04390,map04510,map04611,map04720,map04728,map04750,map04810,map04910,map04921,map04931,map05031,map05034,map05168,map05205				ko00000,ko00001,ko01000,ko01009,ko03019,ko03021,ko03041				NA
43667	1.07512	0.0383309	Carbohydrate transport and metabolism	N-terminal barrel of NtMGAM and CtMGAM, maltase-glucoamylase	GO:0000272,GO:0003674,GO:0003824,GO:0004553,GO:0004558,GO:0005975,GO:0005976,GO:0008150,GO:0008152,GO:0008422,GO:0009056,GO:0009057,GO:0009251,GO:0015926,GO:0016052,GO:0016787,GO:0016798,GO:0043170,GO:0044042,GO:0044238,GO:0071704,GO:0090599,GO:1901575	Glycoside hydrolase, family 31|Glycoside hydrolase, family 31|Glycoside hydrolase, family 31|Glycoside hydrolase, catalytic core	3.2.1.20	ko:K01187	ko00052,ko00500,ko01100,map00052,map00500,map01100		R00028,R00801,R00802,R06087,R06088	RC00028,RC00049,RC00077	ko00000,ko00001,ko01000		GH31		NA
74380	1.03117	0.0377921	Signal transduction mechanisms	Protein phosphatase 2A homologues, catalytic domain.	GO:0000082,GO:0000278,GO:0000749,GO:0000754,GO:0003674,GO:0003824,GO:0004721,GO:0004722,GO:0004723,GO:0005575,GO:0005622,GO:0005623,GO:0005737,GO:0005826,GO:0005856,GO:0005938,GO:0005955,GO:0006464,GO:0006470,GO:0006793,GO:0006796,GO:0006807,GO:0006873,GO:0007049,GO:0007154,GO:0007165,GO:0008150,GO:0008152,GO:0008287,GO:0009966,GO:0009987,GO:0010033,GO:0010035,GO:0010038,GO:0010522,GO:0010523,GO:…	Serine/threonine-specific protein phosphatase and bis(5-nucleosyl)-tetraphosphatase|Serine/threonine-specific protein phosphatase and bis(5-nucleosyl)-tetraphosphatase|Metallophosphoesterase|Serine/threonine-specific protein phosphatase and bis(5-nucleosyl)-tetraphosphatase|Serine/threonine-specific protein phosphatase and bis(5-nucleosyl)-tetraphosphatase	3.1.3.16	ko:K04348	ko04010,ko04020,ko04022,ko04114,ko04218,ko04310,ko04360,ko04370,ko04380,ko04650,ko04658,ko04659,ko04660,ko04662,ko04720,ko04724,ko04728,ko04921,ko04922,ko04924,ko05010,ko05014,ko05031,ko05152,ko05166,ko05167,map04010,map04020,map04022,map04114,map04218,map04310,map04360,map04370,map04380,map04650,map04658,map04659,map04660,map04662,map04720,map04724,map04728,map04921,map04922,map04924,map05010,ma…				ko00000,ko00001,ko01000,ko01009				NA
77098	1.58984	0.00797733	Function Unknown			NA											NA
78039	1.3267	0.012899	Cell wall/membrane/envelope biogenesis|Extracellular structures	Four repeated domains in the Fasciclin I family of proteins, present in many other contexts.		Beta-Ig-H3/fasciclin|Beta-Ig-H3/fasciclin|Beta-Ig-H3/fasciclin|Beta-Ig-H3/fasciclin											0.999
81349	1.09028	0.0451054	Carbohydrate transport and metabolism	response to abiotic stimulus		Ankyrin|Vacuolar sorting protein 9|Vacuolar sorting protein 9, subgroup|Ankyrin|Ankyrin|Ankyrin|Vacuolar sorting protein 9|Ankyrin|Phox-like											NA
82954	1.16364	0.0440971	Carbohydrate transport and metabolism	UDP-glucose:Glycoprotein Glucosyltransferase	GO:0000271,GO:0003674,GO:0003824,GO:0003980,GO:0005488,GO:0005509,GO:0005515,GO:0005537,GO:0005575,GO:0005622,GO:0005623,GO:0005737,GO:0005783,GO:0005788,GO:0005975,GO:0005976,GO:0006011,GO:0006073,GO:0006139,GO:0006457,GO:0006458,GO:0006464,GO:0006486,GO:0006487,GO:0006491,GO:0006508,GO:0006515,GO:0006725,GO:0006793,GO:0006807,GO:0006950,GO:0006986,GO:0007154,GO:0007165,GO:0008150,GO:0008152,GO:…	Cyclin-like F-box|Homeodomain-like		ko:K11718	ko04141,map04141				ko00000,ko00001,ko01000,ko01003		GT24		NA
82957	1.11444	0.0198079	Function Unknown	WD domain, G-beta repeat	GO:0005575,GO:0032991	WD40 repeat|WD40 repeat|WD40 repeat|WD40 repeat|WD40 repeat-like		ko:K20241					ko00000,ko04131				NA
83347	1.05757	0.0291117	Cell cycle control, cell division, chromosome partitioning	microtubule binding		Cytoskeleton-associated protein, CAP-Gly|Cytoskeleton-associated protein, CAP-Gly											NA
83965	1.03518	0.047679	Function Unknown			NA											NA
84529	2.90159	0.00751473	Posttranslational modification, protein turnover, chaperones	GDSL-like Lipase/Acylhydrolase		Lipase, GDSL|Esterase, SGNH hydrolase-type											1
85331	1.21624	0.00905257	Cytoskeleton	Tubulin is the major constituent of microtubules. It binds two moles of GTP, one at an exchangeable site on the beta chain and one at a non-exchangeable site on the alpha chain	GO:0000003,GO:0000070,GO:0000166,GO:0000226,GO:0000235,GO:0000278,GO:0000280,GO:0000819,GO:0001882,GO:0001883,GO:0003674,GO:0003824,GO:0003924,GO:0005198,GO:0005200,GO:0005488,GO:0005525,GO:0005575,GO:0005622,GO:0005623,GO:0005634,GO:0005737,GO:0005815,GO:0005816,GO:0005818,GO:0005819,GO:0005828,GO:0005856,GO:0005874,GO:0005876,GO:0005880,GO:0005881,GO:0006810,GO:0006928,GO:0006996,GO:0007005,GO:…	Tubulin|Beta tubulin|Tubulin/FtsZ, GTPase|Tubulin/FtsZ, C-terminal|Tubulin|Beta tubulin, autoregulation binding site|Tubulin/FtsZ, GTPase|Tubulin/FtsZ, C-terminal		ko:K07375	ko04145,ko04540,ko05130,map04145,map04540,map05130				ko00000,ko00001,ko03036,ko04147,ko04812				NA
85571	1.31405	0.0389155	Function Unknown			RhoGAP|Endoplasmic reticulum, protein ERp29, C-terminal|Rho GTPase activation protein											NA
85659	1.39686	0.0123369	Carbohydrate transport and metabolism	glycoside hydrolase family 16 protein		Beta-glucanase|Glycoside hydrolase, family 16|Concanavalin A-like lectin/glucanase											NA
86859	1.04293	0.0249747	Function Unknown	NA	NA	NA	NA	NA	NA	NA	NA	NA	NA	NA	NA	NA	NA
