# Supplementary material for: A Mucoralean White Collar-1 Photoreceptor Controls Virulence by Regulating an Intricate Gene-Network during Host Interactions.
Source: Preprints.org preprint supplement (doi:10.20944/preprints202012.0804.v1), 2020-12-31
Supplement: Supplementary file 7 [file tableS4.xlsx]

## Sheet: cluster3
GeneID	log2FC_WC1aM.R7BM	adj_pvalue	KOG.Class	KOG.def	GOs	iprDesc	EC	KEGG_ko	KEGG_Pathway	KEGG_Module	KEGG_Reaction	KEGG_rclass	BRITE	KEGG_TC	CAZy	BiGG_Reaction	hmm_signalpep_probability
105608	-2.07895	0.0363009	Function Unknown	Domain of unkown function (DUF1775)		GLE1, N-terminal, bacteria											0.994
105940	-2.31796	0.0261024	Carbohydrate transport and metabolism	Transporter		Major facilitator superfamily MFS-1|Major facilitator superfamily|MFS general substrate transporter											NA
106321	-1.18871	0.0417622	Function Unknown	Regulator of G protein signaling domain		Regulator of G protein signalling|Regulator of G protein signalling superfamily											NA
109599	-1.37385	0.0438943	Function Unknown	NADH-ubiquinone reductase complex 1 MLRQ subunit		NA											0.997
110900	-1.36445	0.0217234	Function Unknown	Uncharacterised protein family (UPF0014)		Conserved hypothetical protein CHP00245											NA
111191	-2.04205	0.0156549	Carbohydrate transport and metabolism	Arginase family	GO:0006082,GO:0006520,GO:0006525,GO:0006576,GO:0006595,GO:0006596,GO:0006807,GO:0008150,GO:0008152,GO:0009058,GO:0009064,GO:0009308,GO:0009309,GO:0009445,GO:0009446,GO:0009987,GO:0019752,GO:0033388,GO:0034641,GO:0042401,GO:0043436,GO:0044106,GO:0044237,GO:0044238,GO:0044249,GO:0044271,GO:0044281,GO:0071704,GO:0097164,GO:1901564,GO:1901566,GO:1901576,GO:1901605	Arginase|Ureohydrolase|Putative agmatinase|Ureohydrolase|Ureohydrolase	3.5.3.11	ko:K01480	ko00330,ko01100,map00330,map01100	M00133	R01157	RC00024,RC00329	ko00000,ko00001,ko00002,ko01000				0.999
114189	-1.82364	0.00905257	Signal transduction mechanisms	mhyt domain		MHYT|MHYT											NA
116920	-1.70909	0.028338	Inorganic ion transport and metabolism	haloacid dehalogenase-like hydrolase		ATPase, P-type, K/Mg/Cd/Cu/Zn/Na/Ca/Na/H-transporter|E1-E2 ATPase-associated region|Haloacid dehalogenase-like hydrolase|ATPase, P-type, K/Mg/Cd/Cu/Zn/Na/Ca/Na/H-transporter											NA
122705	-1.8665	0.0191464	Function Unknown	AN1-like Zinc finger		Zinc finger, AN1-type|Zinc finger, AN1-type											NA
134260	-3.18968	0.0262319	Function Unknown	C2H2-type zinc finger	GO:0000003,GO:0000271,GO:0000278,GO:0000281,GO:0000282,GO:0000902,GO:0000910,GO:0000976,GO:0000981,GO:0000982,GO:0000987,GO:0001067,GO:0001077,GO:0001228,GO:0002028,GO:0002831,GO:0002833,GO:0003674,GO:0003676,GO:0003677,GO:0003690,GO:0003700,GO:0005488,GO:0005575,GO:0005622,GO:0005623,GO:0005634,GO:0005737,GO:0005975,GO:0005976,GO:0006022,GO:0006023,GO:0006030,GO:0006031,GO:0006037,GO:0006038,GO:…	Zinc finger, C2H2-type|Zinc finger, C2H2-type|Zinc finger, C2H2-like|Zinc finger, C2H2-type|Zinc finger, C2H2-type		ko:K21543					ko00000,ko03000				NA
154524	-1.31298	0.0243799	Replication, recombination and repair	galactose oxidase		Kelch repeat type 1|Kelch repeat type 2|Kelch repeat type 1|Galactose oxidase/kelch, beta-propeller											NA
155506	-1.30267	0.0393383	Function Unknown	NA	NA	NA	NA	NA	NA	NA	NA	NA	NA	NA	NA	NA	NA
155551	-1.21028	0.0214049	Transcription	KilA-N	GO:0000003,GO:0000122,GO:0000128,GO:0000228,GO:0000785,GO:0000790,GO:0000902,GO:0000905,GO:0001410,GO:0001558,GO:0002831,GO:0002833,GO:0003006,GO:0003674,GO:0003676,GO:0003677,GO:0003700,GO:0005488,GO:0005575,GO:0005622,GO:0005623,GO:0005634,GO:0005694,GO:0005737,GO:0005829,GO:0006355,GO:0006357,GO:0006928,GO:0006950,GO:0007124,GO:0007154,GO:0007155,GO:0007275,GO:0008150,GO:0009267,GO:0009268,GO:…	DNA-binding, yeast|Mlu1-box-binding protein, DNA-binding		ko:K12763	ko04113,map04113				ko00000,ko00001,ko03000				0.145
155630	-1.41491	0.0128859	Function Unknown	Polysaccharide deacetylase		Polysaccharide deacetylase|Glycoside hydrolase/deacetylase, beta/alpha-barrel											0.958
156070	-1.47514	0.0223271	Function Unknown			NA											NA
156269	-2.11097	0.0391115	Posttranslational modification, protein turnover, chaperones	Eukaryotic aspartyl protease		Peptidase A1|Peptidase A1|Peptidase aspartic, active site|Peptidase aspartic, catalytic											0.999
156611	-1.46031	0.0476925	Function Unknown	palmitoyl-(protein) hydrolase activity		NA											1
156678	-1.02758	0.0351286	Function Unknown			NA											NA
157335	-1.20607	0.0344433	Energy production and conversion	Aldo/keto reductase family	GO:0003674,GO:0003824,GO:0008150,GO:0008152,GO:0009058,GO:0009987,GO:0016491,GO:0016614,GO:0016616,GO:0018130,GO:0044237,GO:0044249,GO:0045290,GO:0046483,GO:0051186,GO:0051188,GO:0055114,GO:0070484,GO:0070485,GO:0071704,GO:1901334,GO:1901336,GO:1901360,GO:1901362,GO:1901576	Aldo/keto reductase|Aldo/keto reductase|Aldo/keto reductase|Aldo/keto reductase	1.1.1.116	ko:K00062					ko00000,ko01000				NA
157498	-1.84375	0.0139626	Function Unknown	Protein of unknown function (DUF1688)		Protein of unknown function DUF1688											NA
159135	-1.49543	0.0393874	Function Unknown	NA	NA	NA	NA	NA	NA	NA	NA	NA	NA	NA	NA	NA	1
164510	-2.08812	0.0317583	Amino acid transport and metabolism	Mortierella verticillata NRRL 6337		Amino acid transporter, transmembrane											NA
165083	-1.44956	0.0423163	Function Unknown	NA	NA	NA	NA	NA	NA	NA	NA	NA	NA	NA	NA	NA	NA
165980	-1.95294	0.0148349	Posttranslational modification, protein turnover, chaperones	Pyridine nucleotide-disulphide oxidoreductase	GO:0000302,GO:0000303,GO:0000305,GO:0003674,GO:0003824,GO:0004791,GO:0005488,GO:0005506,GO:0005575,GO:0005622,GO:0005623,GO:0005737,GO:0005739,GO:0005740,GO:0005758,GO:0005829,GO:0006801,GO:0006950,GO:0006979,GO:0008150,GO:0008152,GO:0008198,GO:0009636,GO:0009987,GO:0010035,GO:0015036,GO:0016209,GO:0016491,GO:0016651,GO:0016667,GO:0016668,GO:0019430,GO:0019725,GO:0031967,GO:0031970,GO:0031974,GO:…	Pyridine nucleotide-disulphide oxidoreductase, NAD-binding region|FAD-dependent pyridine nucleotide-disulphide oxidoreductase|Adrenodoxin reductase|Pyridine nucleotide-disulphide oxidoreductase, class-II|Pyridine nucleotide-disulphide oxidoreductase, NAD-binding region|FAD-dependent pyridine nucleotide-disulphide oxidoreductase|Thioredoxin reductase|Pyridine nucleotide-disulphide oxidoreductase, …	1.6.5.5,1.8.1.9	ko:K00344,ko:K00384	ko00450,map00450		R02016,R03596,R09372	RC00013,RC02518,RC02873	ko00000,ko00001,ko01000				NA
168092	-2.28736	0.0270197	Secondary metabolites biosynthesis, transport and catabolism	ParB-like nuclease domain	GO:0003674,GO:0003824,GO:0005575,GO:0005622,GO:0005623,GO:0005634,GO:0005737,GO:0006950,GO:0006979,GO:0008104,GO:0008150,GO:0008152,GO:0009636,GO:0009987,GO:0016209,GO:0016491,GO:0016667,GO:0032542,GO:0033036,GO:0033554,GO:0034599,GO:0034613,GO:0042221,GO:0043226,GO:0043227,GO:0043229,GO:0043231,GO:0044424,GO:0044464,GO:0050896,GO:0051179,GO:0051641,GO:0051716,GO:0055114,GO:0070727,GO:0070887,GO:…	Sulfiredoxin|ParB-like nuclease|ParB-like nuclease	1.8.98.2	ko:K12260					ko00000,ko01000				NA
174448	-2.98657	0.0223239	Signal transduction mechanisms	Mortierella verticillata NRRL 6337 OPT family small oligopeptide transporter		Anaerobic c4-dicarboxylate membrane transporter|Oligopeptide transporter OPT superfamily|Tetrapeptide transporter, OPT1/isp4|Oligopeptide transporter OPT superfamily											0.991
174921	-1.84375	0.0139626	Function Unknown	Protein of unknown function (DUF1688)		Protein of unknown function DUF1688											NA
180692	-2.56648	0.0330446	Coenzyme transport and metabolism	Polyprenyl synthetase		Polyprenyl synthetase|Polyprenyl synthetase|Polyprenyl synthetase|Terpenoid synthase	2.5.1.1,2.5.1.10,2.5.1.29	ko:K00804	ko00900,ko01100,ko01110,ko01130,map00900,map01100,map01110,map01130	M00367	R01658,R02003,R02061	RC00279	ko00000,ko00001,ko00002,ko01000,ko01006				NA
185590	-1.71671	0.023992	Function Unknown	Methyltransferase domain		Methyltransferase type 11											NA
185761	-1.5698	0.0204526	Function Unknown	Cyclin-dependent protein kinase		Cyclin-like											NA
185910	-1.13858	0.0325152	Energy production and conversion	iron ion binding		Cytochrome P450, E-class, group I|Cytochrome P450|Cytochrome P450|Cytochrome P450	2.1.1.317	ko:K14999,ko:K20238					ko00000,ko00199,ko01000				NA
188832	-1.25244	0.0344433	Function Unknown			NA											NA
32486	-1.3929	0.0399376	Amino acid transport and metabolism	POT family	GO:0000322,GO:0000323,GO:0000324,GO:0003674,GO:0005215,GO:0005575,GO:0005622,GO:0005623,GO:0005737,GO:0005773,GO:0005886,GO:0005887,GO:0006810,GO:0006857,GO:0008150,GO:0015833,GO:0016020,GO:0016021,GO:0022857,GO:0031224,GO:0031226,GO:0031520,GO:0032153,GO:0035442,GO:0035443,GO:0035672,GO:0035673,GO:0042886,GO:0042887,GO:0042937,GO:0042938,GO:0042939,GO:0043226,GO:0043227,GO:0043229,GO:0043231,GO:…	TGF-beta receptor, type I/II extracellular region|TGF-beta receptor, type I/II extracellular region|TGF-beta receptor, type I/II extracellular region|MFS general substrate transporter		ko:K03305					ko00000	2.A.17			NA
34232	-2.15511	0.0208528	Amino acid transport and metabolism	Amino acid permease		Amino acid permease-associated region|Amino acid/polyamine transporter I											NA
39960	-1.6055	0.0481321	Inorganic ion transport and metabolism	Mortierella verticillata NRRL 6337	GO:0003674,GO:0005215,GO:0005451,GO:0005575,GO:0005622,GO:0005623,GO:0005737,GO:0005739,GO:0005783,GO:0005794,GO:0005886,GO:0006810,GO:0006811,GO:0006812,GO:0006813,GO:0006873,GO:0006875,GO:0008150,GO:0008324,GO:0009987,GO:0012505,GO:0015075,GO:0015077,GO:0015078,GO:0015079,GO:0015291,GO:0015297,GO:0015298,GO:0015299,GO:0015318,GO:0015386,GO:0015491,GO:0015672,GO:0016020,GO:0016021,GO:0019725,GO:…	Sodium/hydrogen exchanger											NA
78434	-1.47324	0.0209868	Function Unknown	Leucine-rich repeat - CC (cysteine-containing) subfamily		Leucine-rich repeat|Cyclin-like F-box|Leucine-rich repeat, cysteine-containing subtype|Cyclin-like F-box											NA
81735	-1.03342	0.0436473	Function Unknown			NA											NA
83365	-1.10422	0.0361748	Function Unknown	Mortierella verticillata NRRL 6337		GPCR, family 2, secretin-like											NA
84447	-1.15062	0.028614	Function Unknown	NA	NA	NA	NA	NA	NA	NA	NA	NA	NA	NA	NA	NA	NA
