# Supplementary material for: A Mucoralean White Collar-1 Photoreceptor Controls Virulence by Regulating an Intricate Gene-Network during Host Interactions.
Source: Preprints.org preprint supplement (doi:10.20944/preprints202012.0804.v1), 2020-12-31
Supplement: Supplementary file 9 [file tableS5.xlsx]

## Sheet: cluster4
GeneID	log2FC_WC1aM.R7BM	adj_pvalue	KOG.Class	KOG.def	GOs	iprDesc	EC	KEGG_ko	KEGG_Pathway	KEGG_Module	KEGG_Reaction	KEGG_rclass	BRITE	KEGG_TC	CAZy	BiGG_Reaction	hmm_signalpep_probability
106064	1.0463	0.0325152	Function Unknown	ATP dependent DNA ligase domain		ATP dependent DNA ligase, central|Nucleic acid-binding, OB-fold-like	6.5.1.1,6.5.1.6,6.5.1.7	ko:K10747	ko03030,ko03410,ko03420,ko03430,map03030,map03410,map03420,map03430		R00381,R00382,R10822,R10823	RC00005	ko00000,ko00001,ko01000,ko03032,ko03400				NA
106231	1.70322	0.00835972	Function Unknown	NA	NA	NA	NA	NA	NA	NA	NA	NA	NA	NA	NA	NA	NA
106239	2.54227	0.00790959	Function Unknown	NA	NA	NA	NA	NA	NA	NA	NA	NA	NA	NA	NA	NA	NA
106240	2.26611	0.00751473	Function Unknown			NA											NA
106243	1.6421	0.00695195	Lipid transport and metabolism	SacI homology domain	GO:0000139,GO:0002178,GO:0003674,GO:0003824,GO:0004438,GO:0005575,GO:0005622,GO:0005623,GO:0005737,GO:0005739,GO:0005740,GO:0005741,GO:0005783,GO:0005789,GO:0005794,GO:0005795,GO:0005797,GO:0005938,GO:0006629,GO:0006644,GO:0006650,GO:0006661,GO:0006793,GO:0006796,GO:0008150,GO:0008152,GO:0008610,GO:0008654,GO:0009058,GO:0009987,GO:0012505,GO:0016020,GO:0016021,GO:0016311,GO:0016787,GO:0016788,GO:…	Synaptojanin, N-terminal|Synaptojanin, N-terminal		ko:K21797	ko00562,ko01100,ko04070,map00562,map01100,map04070		R11680	RC00078	ko00000,ko00001,ko01000				NA
106254	2.50021	0.00790959	Function Unknown	NA	NA	NA	NA	NA	NA	NA	NA	NA	NA	NA	NA	NA	NA
107923	1.51908	0.0128859	Function Unknown	NA	NA	NA	NA	NA	NA	NA	NA	NA	NA	NA	NA	NA	NA
108920	2.64844	0.0100202	Amino acid transport and metabolism	Gamma-glutamyltranspeptidase	GO:0000322,GO:0000323,GO:0000324,GO:0003674,GO:0003824,GO:0005575,GO:0005622,GO:0005623,GO:0005737,GO:0005773,GO:0006508,GO:0006518,GO:0006575,GO:0006749,GO:0006751,GO:0006790,GO:0006805,GO:0006807,GO:0008150,GO:0008152,GO:0008233,GO:0008238,GO:0008242,GO:0009056,GO:0009410,GO:0009636,GO:0009987,GO:0016787,GO:0019538,GO:0034641,GO:0036374,GO:0042219,GO:0042221,GO:0043170,GO:0043171,GO:0043226,GO:…	Gamma-glutamyltranspeptidase|Gamma-glutamyltranspeptidase|Gamma-glutamyltranspeptidase	2.3.2.2,3.4.19.13,3.4.19.14	ko:K00681,ko:K18592	ko00430,ko00460,ko00480,ko00590,ko01100,map00430,map00460,map00480,map00590,map01100		R00494,R01262,R01687,R03867,R03916,R03970,R03971,R04935,R09875	RC00064,RC00090,RC00096	ko00000,ko00001,ko01000,ko01002,ko04090				0.994
109594	1.02267	0.0245903	Function Unknown	to Saccharomyces cerevisiae SPO22 (YIL073C)	GO:0005575,GO:0005622,GO:0005623,GO:0005634,GO:0008150,GO:0009893,GO:0010564,GO:0010604,GO:0019222,GO:0031323,GO:0031325,GO:0031399,GO:0031401,GO:0032268,GO:0032270,GO:0033043,GO:0033044,GO:0033233,GO:0033235,GO:0040020,GO:0043226,GO:0043227,GO:0043229,GO:0043231,GO:0044087,GO:0044424,GO:0044464,GO:0048518,GO:0048522,GO:0050789,GO:0050794,GO:0051128,GO:0051171,GO:0051173,GO:0051246,GO:0051247,GO:…	NA											NA
110983	1.53381	0.0128859	Function Unknown	NA	NA	NA	NA	NA	NA	NA	NA	NA	NA	NA	NA	NA	NA
111487	2.02787	0.0324973	Function Unknown	NA	NA	NA	NA	NA	NA	NA	NA	NA	NA	NA	NA	NA	NA
111511	1.03925	0.0143576	Transcription	zinc finger binding to DNA consensus sequence [AT]GATA[AG]		Zinc finger, GATA-type|Zinc finger, GATA-type|Zinc finger, GATA-type|Zinc finger, GATA-type											NA
111983	1.97252	0.0101073	Function Unknown	PH domain		Pleckstrin-like|Pleckstrin-like|Pleckstrin-like											NA
113162	1.00001	0.0100492	Function Unknown	NA	NA	NA	NA	NA	NA	NA	NA	NA	NA	NA	NA	NA	NA
114537	1.1073	0.0234785	Translation, ribosomal structure and biogenesis	RF-1 domain	GO:0003674,GO:0003676,GO:0003723,GO:0003747,GO:0003824,GO:0004045,GO:0005488,GO:0006412,GO:0006414,GO:0006415,GO:0006417,GO:0006518,GO:0006807,GO:0008079,GO:0008135,GO:0008150,GO:0008152,GO:0009058,GO:0009059,GO:0009889,GO:0009987,GO:0010467,GO:0010468,GO:0010556,GO:0010608,GO:0016043,GO:0016150,GO:0016787,GO:0016788,GO:0019222,GO:0019538,GO:0022411,GO:0031323,GO:0031326,GO:0032268,GO:0032543,GO:…	Class I peptide chain release factor|Class I peptide chain release factor	3.1.1.29	ko:K15033					ko00000,ko01000,ko03012				NA
115252	1.41364	0.0341332	Function Unknown	NA	NA	NA	NA	NA	NA	NA	NA	NA	NA	NA	NA	NA	NA
116215	1.22086	0.0435837	Function Unknown	Essential protein Yae1, N terminal		NA											NA
116261	1.6312	0.00826411	Function Unknown	NA	NA	NA	NA	NA	NA	NA	NA	NA	NA	NA	NA	NA	NA
116306	1.47523	0.0162499	Function Unknown	NA	NA	NA	NA	NA	NA	NA	NA	NA	NA	NA	NA	NA	NA
120498	2.42088	0.0268107	Cell cycle control, cell division, chromosome partitioning|Cytoskeleton	Btb domain and ankyrin repeat protein	GO:0000151,GO:0005575,GO:0005622,GO:0005623,GO:0006464,GO:0006807,GO:0008150,GO:0008152,GO:0009987,GO:0019538,GO:0032991,GO:0036211,GO:0043170,GO:0043412,GO:0044237,GO:0044238,GO:0044260,GO:0044267,GO:0044424,GO:0044464,GO:0070647,GO:0071704,GO:1901564,GO:1902494,GO:1990234	Regulator of chromosome condensation, RCC1|Ankyrin|Ankyrin|Regulator of chromosome condensation, RCC1|Ankyrin|Ankyrin|Regulator of chromosome condensation/beta-lactamase-inhibitor protein II											NA
122340	10.345	0.00240915	Posttranslational modification, protein turnover, chaperones	chitin deacetylase		Polysaccharide deacetylase|Glycoside hydrolase/deacetylase, beta/alpha-barrel	3.5.1.41	ko:K01452	ko00520,ko01100,map00520,map01100		R02333	RC00166,RC00300	ko00000,ko00001,ko01000				NA
125572	1.31686	0.0337277	Function Unknown	DNL zinc finger	GO:0003674,GO:0005488,GO:0005515,GO:0005575,GO:0005622,GO:0005623,GO:0005737,GO:0005739,GO:0005740,GO:0005743,GO:0005744,GO:0005759,GO:0006457,GO:0006605,GO:0006626,GO:0006810,GO:0006839,GO:0006886,GO:0006950,GO:0006986,GO:0006996,GO:0007005,GO:0008104,GO:0008150,GO:0009987,GO:0010033,GO:0015031,GO:0015833,GO:0016020,GO:0016043,GO:0017038,GO:0019866,GO:0030150,GO:0031090,GO:0031647,GO:0031966,GO:…	Zinc finger, Zim17-type		ko:K17808					ko00000,ko03029				NA
137477	1.52164	0.0325152	Coenzyme transport and metabolism	Fumble	GO:0003674,GO:0003824,GO:0004594,GO:0005575,GO:0005622,GO:0005623,GO:0005634,GO:0005737,GO:0006139,GO:0006163,GO:0006164,GO:0006725,GO:0006732,GO:0006753,GO:0006793,GO:0006796,GO:0006807,GO:0008150,GO:0008152,GO:0009058,GO:0009108,GO:0009117,GO:0009150,GO:0009152,GO:0009165,GO:0009259,GO:0009260,GO:0009987,GO:0015936,GO:0015937,GO:0016301,GO:0016310,GO:0016740,GO:0016772,GO:0016773,GO:0018130,GO:…	Fumble|Eukaryotic pantothenate kinase	2.7.1.33	ko:K09680	ko00770,ko01100,map00770,map01100	M00120	R02971,R03018,R04391	RC00002,RC00017	ko00000,ko00001,ko00002,ko01000				NA
137874	2.26696	0.00386244	Function Unknown	von Willebrand factor (vWF) type A domain		ATPase associated with various cellular activities, AAA-5|von Willebrand factor, type A											NA
139070	1.227	0.0456869	Replication, recombination and repair	DNA mismatch repair protein, C-terminal domain		ATP-binding region, ATPase-like|DNA mismatch repair, conserved site|ATP-binding region, ATPase-like											NA
146523	1.12008	0.0249745	Cell cycle control, cell division, chromosome partitioning|Intracellular trafficking, secretion, and vesicular transport|Cytoskeleton	Septin	GO:0000144,GO:0000166,GO:0000278,GO:0000281,GO:0000399,GO:0000910,GO:0000921,GO:0001882,GO:0001883,GO:0001932,GO:0001934,GO:0003674,GO:0003824,GO:0003924,GO:0005198,GO:0005488,GO:0005515,GO:0005525,GO:0005543,GO:0005575,GO:0005618,GO:0005621,GO:0005622,GO:0005623,GO:0005628,GO:0005737,GO:0005826,GO:0005856,GO:0005933,GO:0005935,GO:0005937,GO:0005938,GO:0005940,GO:0006996,GO:0007010,GO:0007049,GO:…	Cell division/GTP binding protein|Cell division/GTP binding protein|Septin		ko:K16948					ko00000,ko04812				NA
154372	1.48311	0.00930226	Cell wall/membrane/envelope biogenesis	GDP-mannose 4,6 dehydratase		NAD-dependent epimerase/dehydratase|UDP-glucose 4-epimerase|NAD(P)-binding											NA
154973	1.09545	0.014447	Secondary metabolites biosynthesis, transport and catabolism	Chromatin organization modifier domain	GO:0000166,GO:0002181,GO:0002182,GO:0003674,GO:0003676,GO:0003723,GO:0003746,GO:0003824,GO:0003924,GO:0005488,GO:0005524,GO:0005575,GO:0005618,GO:0005622,GO:0005623,GO:0005737,GO:0005829,GO:0005840,GO:0005886,GO:0006412,GO:0006414,GO:0006415,GO:0006518,GO:0006807,GO:0008135,GO:0008144,GO:0008150,GO:0008152,GO:0009058,GO:0009059,GO:0009277,GO:0009986,GO:0009987,GO:0010467,GO:0010494,GO:0016020,GO:…	ABC transporter-like|ABC transporter-like|ABC transporter-like		ko:K03235					ko00000,ko03012				NA
155012	1.98794	0.019462	Amino acid transport and metabolism	D-isomer specific 2-hydroxyacid dehydrogenase, catalytic domain	GO:0003674,GO:0003824,GO:0004617,GO:0005575,GO:0005622,GO:0005623,GO:0005737,GO:0006082,GO:0006520,GO:0006563,GO:0006564,GO:0006807,GO:0008150,GO:0008152,GO:0008652,GO:0009058,GO:0009069,GO:0009070,GO:0009987,GO:0016053,GO:0016491,GO:0016614,GO:0016616,GO:0019752,GO:0043436,GO:0044237,GO:0044238,GO:0044249,GO:0044281,GO:0044283,GO:0044424,GO:0044464,GO:0046394,GO:0047545,GO:0055114,GO:0061759,GO:…	D-isomer specific 2-hydroxyacid dehydrogenase, catalytic region|Amino acid-binding ACT|D-isomer specific 2-hydroxyacid dehydrogenase, NAD-binding|D-isomer specific 2-hydroxyacid dehydrogenase, NAD-binding|NAD(P)-binding	1.1.1.399,1.1.1.95	ko:K00058	ko00260,ko00680,ko01100,ko01120,ko01130,ko01200,ko01230,map00260,map00680,map01100,map01120,map01130,map01200,map01230	M00020	R01513	RC00031	ko00000,ko00001,ko00002,ko01000,ko04147				NA
155129	2.04898	0.00698271	Coenzyme transport and metabolism	Delta-aminolevulinic acid dehydratase	GO:0003674,GO:0003824,GO:0004655,GO:0005488,GO:0005575,GO:0005622,GO:0005623,GO:0005634,GO:0005737,GO:0005829,GO:0006725,GO:0006778,GO:0006779,GO:0006783,GO:0006807,GO:0008150,GO:0008152,GO:0008270,GO:0009058,GO:0009987,GO:0016829,GO:0016835,GO:0016836,GO:0018130,GO:0019438,GO:0033013,GO:0033014,GO:0034641,GO:0042168,GO:0042440,GO:0043167,GO:0043169,GO:0043226,GO:0043227,GO:0043229,GO:0043231,GO:…	Tetrapyrrole biosynthesis, porphobilinogen synthase|Tetrapyrrole biosynthesis, porphobilinogen synthase|Tetrapyrrole biosynthesis, porphobilinogen synthase|Tetrapyrrole biosynthesis, porphobilinogen synthase|Tetrapyrrole biosynthesis, porphobilinogen synthase	4.2.1.24	ko:K01698	ko00860,ko01100,ko01110,ko01120,map00860,map01100,map01110,map01120	M00121	R00036	RC00918,RC01781	ko00000,ko00001,ko00002,ko01000,ko04147				NA
155243	1.06429	0.0403374	Coenzyme transport and metabolism	Serine hydroxymethyltransferase	GO:0003674,GO:0003824,GO:0004372,GO:0005575,GO:0005622,GO:0005623,GO:0005737,GO:0005739,GO:0006082,GO:0006520,GO:0006730,GO:0006807,GO:0008150,GO:0008152,GO:0008652,GO:0009058,GO:0009069,GO:0009070,GO:0009987,GO:0016053,GO:0016740,GO:0016741,GO:0016742,GO:0019752,GO:0043226,GO:0043227,GO:0043229,GO:0043231,GO:0043436,GO:0044237,GO:0044238,GO:0044249,GO:0044281,GO:0044283,GO:0044424,GO:0044444,GO:…	Glycine hydroxymethyltransferase|Glycine hydroxymethyltransferase|Glycine hydroxymethyltransferase|Pyridoxal phosphate-dependent transferase, major region	2.1.2.1	ko:K00600	ko00260,ko00460,ko00630,ko00670,ko00680,ko01100,ko01110,ko01120,ko01130,ko01200,ko01230,ko01523,map00260,map00460,map00630,map00670,map00680,map01100,map01110,map01120,map01130,map01200,map01230,map01523	M00140,M00141,M00346,M00532	R00945,R09099	RC00022,RC00112,RC01583,RC02958	ko00000,ko00001,ko00002,ko01000			iMM904.YBR263W,iND750.YBR263W	NA
155334	1.05556	0.0291117	Amino acid transport and metabolism	Catalyzes the NADPH-dependent reduction of ketopantoate into pantoic acid	GO:0003674,GO:0003824,GO:0005575,GO:0005622,GO:0005623,GO:0005737,GO:0006082,GO:0006520,GO:0006573,GO:0006575,GO:0006732,GO:0006766,GO:0006767,GO:0006807,GO:0008150,GO:0008152,GO:0008677,GO:0009058,GO:0009081,GO:0009108,GO:0009110,GO:0009987,GO:0015939,GO:0015940,GO:0016053,GO:0016491,GO:0016614,GO:0016616,GO:0019752,GO:0032787,GO:0033317,GO:0034641,GO:0042364,GO:0042398,GO:0043436,GO:0043603,GO:…	Ketopantoate reductase ApbA/PanE, N-terminal|Ketopantoate reductase ApbA/PanE, C-terminal|6-phosphogluconate dehydrogenase, C-terminal-like|NAD(P)-binding	1.1.1.169,1.14.14.17	ko:K00077,ko:K00511	ko00100,ko00770,ko00909,ko01100,ko01110,ko01130,map00100,map00770,map00909,map01100,map01110,map01130	M00119	R02472,R02874	RC00201,RC00726	ko00000,ko00001,ko00002,ko01000				NA
156075	9.99169	0.00240915	Transcription	helix loop helix domain		NA											NA
156240	1.20195	0.0186824	Intracellular trafficking, secretion, and vesicular transport	Protein kinase C conserved region 2 (CalB)	GO:0003674,GO:0005488,GO:0005543,GO:0005575,GO:0005622,GO:0005623,GO:0005737,GO:0005783,GO:0005886,GO:0005938,GO:0008150,GO:0008289,GO:0009987,GO:0012505,GO:0016020,GO:0022406,GO:0031984,GO:0032541,GO:0043167,GO:0043168,GO:0043226,GO:0043227,GO:0043229,GO:0043231,GO:0044422,GO:0044424,GO:0044432,GO:0044444,GO:0044446,GO:0044448,GO:0044464,GO:0051179,GO:0051640,GO:0051641,GO:0051643,GO:0061817,GO:…	NA											NA
156241	1.2028	0.0217234	Energy production and conversion	Pyridine nucleotide-disulphide oxidoreductase	GO:0000166,GO:0003674,GO:0003824,GO:0005488,GO:0005575,GO:0005622,GO:0005623,GO:0005737,GO:0005739,GO:0006518,GO:0006575,GO:0006749,GO:0006750,GO:0006790,GO:0006807,GO:0006873,GO:0006950,GO:0008150,GO:0008152,GO:0009058,GO:0009636,GO:0009987,GO:0010035,GO:0010038,GO:0016491,GO:0016667,GO:0016672,GO:0019184,GO:0019222,GO:0019725,GO:0019748,GO:0030002,GO:0030320,GO:0031323,GO:0034641,GO:0036094,GO:…	FAD-dependent pyridine nucleotide-disulphide oxidoreductase|FAD-dependent pyridine nucleotide-disulphide oxidoreductase	1.8.5.8	ko:K22470	ko00920,map00920		R11929	RC02313	ko00000,ko00001,ko01000				NA
158341	1.24605	0.0403215	Function Unknown	NA	NA	Cyclin-like F-box|Cyclin-like F-box|Cyclin-like F-box	NA	NA	NA	NA	NA	NA	NA	NA	NA	NA	NA
159414	2.4522	0.0100492	Function Unknown			NA											NA
159417	1.73257	0.00698271	Function Unknown	NA	NA	NA	NA	NA	NA	NA	NA	NA	NA	NA	NA	NA	NA
159420	1.40345	0.0317583	Intracellular trafficking, secretion, and vesicular transport	Cortical protein marker for cell polarity	GO:0000278,GO:0000281,GO:0000282,GO:0000910,GO:0005575,GO:0005618,GO:0005621,GO:0005622,GO:0005623,GO:0005737,GO:0005739,GO:0005783,GO:0005886,GO:0005933,GO:0005935,GO:0006996,GO:0007010,GO:0007015,GO:0007049,GO:0007163,GO:0008150,GO:0008360,GO:0009277,GO:0009898,GO:0009987,GO:0012505,GO:0016020,GO:0016043,GO:0022402,GO:0022603,GO:0022604,GO:0030010,GO:0030029,GO:0030036,GO:0030312,GO:0030427,GO:…	Src homology-3|Src homology-3|Src homology-3|Src homology-3|Src homology-3|Galactose oxidase/kelch, beta-propeller											NA
161836	1.62086	0.0462972	Chromatin structure and dynamics	Integrase core domain		Chromo domain|Chromo domain|Chromo domain-like|Cellulosome enzyme, dockerin type I											NA
166447	1.44117	0.0451751	Transcription	WRKY DNA -binding domain		DNA-binding WRKY											NA
18272	2.20153	0.00958189	Signal transduction mechanisms	GTPase-activator protein for Rho-like GTPases		RhoGAP|RhoGAP|RhoGAP|Rho GTPase activation protein											NA
182750	2.04303	0.00698271	Function Unknown			NA											NA
183442	1.43233	0.0433227	Nucleotide transport and metabolism	Phosphoribosylglycinamide synthetase, C domain	GO:0003674,GO:0003824,GO:0004637,GO:0004641,GO:0005575,GO:0005622,GO:0005623,GO:0005737,GO:0006139,GO:0006144,GO:0006725,GO:0006807,GO:0008150,GO:0008152,GO:0009112,GO:0009987,GO:0016874,GO:0016879,GO:0016882,GO:0034641,GO:0044237,GO:0044238,GO:0044281,GO:0044424,GO:0044464,GO:0046483,GO:0055086,GO:0071704,GO:0072521,GO:1901360,GO:1901564	AIR synthase related protein|Phosphoribosylglycinamide synthetase|AIR synthase related protein, C-terminal|Phosphoribosylglycinamide synthetase|Phosphoribosylglycinamide synthetase|Phosphoribosylglycinamide synthetase|Phosphoribosylformylglycinamidine cyclo-ligase|ATP-grasp fold|Phosphoribosylglycinamide synthetase|Rudiment single hybrid motif|PreATP-grasp-like fold|PurM, N-terminal-like|AIR synt…	6.3.3.1,6.3.4.13	ko:K11788	ko00230,ko01100,ko01110,ko01130,map00230,map01100,map01110,map01130	M00048	R04144,R04208	RC00090,RC00166,RC01100	ko00000,ko00001,ko00002,ko01000			iMM904.YGL234W,iND750.YGL234W	NA
35230	1.96386	0.00958189	Intracellular trafficking, secretion, and vesicular transport	Domain in Tre-2, BUB2p, and Cdc16p. Probable Rab-GAPs.	GO:0003674,GO:0005096,GO:0005488,GO:0005515,GO:0005575,GO:0005622,GO:0005623,GO:0005737,GO:0005739,GO:0005794,GO:0006810,GO:0006886,GO:0008047,GO:0008104,GO:0008150,GO:0012505,GO:0015031,GO:0015833,GO:0016192,GO:0017016,GO:0017137,GO:0019899,GO:0030234,GO:0030695,GO:0031267,GO:0031338,GO:0032879,GO:0033036,GO:0033043,GO:0034613,GO:0042886,GO:0043085,GO:0043087,GO:0043226,GO:0043227,GO:0043229,GO:…	RabGAP/TBC|RabGAP/TBC|RabGAP/TBC|RabGAP/TBC		ko:K20360					ko00000,ko04131				NA
38860	1.35334	0.00835972	Function Unknown	Nuclear chaperone required for maturation and nuclear export of pre-60S ribosome subunits	GO:0000027,GO:0003674,GO:0003824,GO:0005488,GO:0005509,GO:0005575,GO:0005622,GO:0005623,GO:0005634,GO:0005654,GO:0005737,GO:0005739,GO:0006139,GO:0006364,GO:0006396,GO:0006725,GO:0006807,GO:0006996,GO:0008150,GO:0008152,GO:0009987,GO:0010467,GO:0016043,GO:0016070,GO:0016072,GO:0016462,GO:0016787,GO:0016817,GO:0016818,GO:0016887,GO:0017111,GO:0022607,GO:0022613,GO:0022618,GO:0030684,GO:0030687,GO:…	S-adenosylmethionine synthetase|ATPase associated with various cellular activities, AAA-5|AAA+ ATPase, core|RNA polymerase sigma factor 54, interaction		ko:K14572	ko03008,map03008				ko00000,ko00001,ko03009				NA
46661	1.07586	0.0217234	Carbohydrate transport and metabolism	N-terminal domain of ribose phosphate pyrophosphokinase	GO:0002189,GO:0003674,GO:0003824,GO:0004749,GO:0005575,GO:0005622,GO:0005623,GO:0005737,GO:0006015,GO:0006793,GO:0006796,GO:0008150,GO:0008152,GO:0008361,GO:0009058,GO:0009987,GO:0016043,GO:0016740,GO:0016772,GO:0016778,GO:0019637,GO:0019693,GO:0031505,GO:0032535,GO:0032991,GO:0044237,GO:0044424,GO:0044464,GO:0045229,GO:0046390,GO:0046391,GO:0061695,GO:0065007,GO:0065008,GO:0071554,GO:0071555,GO:…	Phosphoribosyltransferase|Phosphoribosyl pyrophosphokinase|Phosphoribosyl pyrophosphate synthetase, conserved site	2.7.6.1	ko:K00948	ko00030,ko00230,ko01100,ko01110,ko01120,ko01130,ko01200,ko01230,map00030,map00230,map01100,map01110,map01120,map01130,map01200,map01230	M00005	R01049	RC00002,RC00078	ko00000,ko00001,ko00002,ko01000				NA
47802	2.31177	0.0122537	Amino acid transport and metabolism	Amino acid permease		NA											NA
76993	1.72622	0.0404593	Posttranslational modification, protein turnover, chaperones	Eukaryotic aspartyl protease		Peptidase A1|Peptidase A1|Peptidase aspartic, active site|Peptidase aspartic, catalytic											0.986
79225	1.81349	0.00835972	Function Unknown	NA	NA	Cyclin-like F-box|Cyclin-like F-box|Cyclin-like F-box	NA	NA	NA	NA	NA	NA	NA	NA	NA	NA	NA
81676	1.10716	0.0399376	Nucleotide transport and metabolism	CobB/CobQ-like glutamine amidotransferase domain	GO:0003674,GO:0003824,GO:0004642,GO:0005575,GO:0005622,GO:0005623,GO:0005737,GO:0006139,GO:0006163,GO:0006164,GO:0006188,GO:0006189,GO:0006725,GO:0006753,GO:0006793,GO:0006796,GO:0006807,GO:0008150,GO:0008152,GO:0009058,GO:0009117,GO:0009123,GO:0009124,GO:0009126,GO:0009127,GO:0009150,GO:0009152,GO:0009156,GO:0009161,GO:0009165,GO:0009167,GO:0009168,GO:0009259,GO:0009260,GO:0009987,GO:0016874,GO:…	AIR synthase related protein|AIR synthase related protein, C-terminal|Phosphoribosylformylglycinamidine synthase, eukaryotes and proteobacteria|PurM, N-terminal-like|AIR synthase related protein, C-terminal	6.3.5.3	ko:K01952	ko00230,ko01100,ko01110,ko01130,map00230,map01100,map01110,map01130	M00048	R04463	RC00010,RC01160	ko00000,ko00001,ko00002,ko01000				NA
81764	1.20527	0.0493342	Transcription	Homeodomain		Homeobox|Homeobox|Homeobox|Homeobox|Homeobox|Homeodomain-like											NA
83154	1.45649	0.0228339	Lipid transport and metabolism	PLD-like domain		NA											NA
89138	1.9887	0.0133471	Function Unknown	NA	NA	NA	NA	NA	NA	NA	NA	NA	NA	NA	NA	NA	NA
